# Supplementary material for: Evaluation of NTRK3 mutation and a mutation-based gene set as biomarkers for immunotherapy outcomes in multiple cancers
Source: Research Square preprint supplement (doi:10.21203/rs.3.rs-7437970/v1), 2025-11-24
Supplement: Supplementary file 1 [file 176c1eb66bb6c34b247e1afa.docx]

| **Table 2: Univariate and multivariate logistic analyses of clincal characteristics, NTRK3 status and immunotherapy response in discovery and validation cohorts.** | | | | | |
| --- | --- | --- | --- | --- | --- |
| **Univariate Results:** | |  |  |  |  |
| **Characteristics** | | **Response** | | | |
| Discovery Cohort | | Validation Cohort | |
| OR(95%CI) | p.value | OR(95%CI) | p.value |
| **Age** | ≥ 65 | Reference |  | Reference |  |
|  | < 65 | 1.79 (1.09-2.97) | 0.022 | 0.77 (0.42-1.43) | 0.410 |
| **Gender** | Female | Reference |  | Reference |  |
|  | Male | 0.83 (0.50-1.39) | 0.492 | 1.17 (0.63-2.17) | 0.609 |
| **Drug** **type** | Anti-CTLA-4 | Reference |  |  |  |
|  | Anti-PD-1/PD-L1 | 0.33 (0.17-0.60) | <0.001 | Reference |  |
|  | Anti-PD-1/PD-L1+CTLA-4 | 0.35 (0.17-0.70) | 0.003 | 0.63 (0.27-1.61) | 0.309 |
| **Cancer** **type** | Melanoma | Reference |  |  |  |
|  | Non-small cell lung cancer | 0.66 (0.38-1.13) | 0.132 | Reference |  |
|  | Other | 0.89 (0.43-1.90) | 0.751 | 0.70 (0.33-1.58) | 0.372 |
| **NTRK3** | Wild | Reference |  | Reference |  |
|  | Mut | 0.38 (0.14-1.00) | 0.047 | 0.24 (0.07-0.81) | 0.019 |
|  |  |  |  |  |  |
|  |  |  |  |  |  |
|  |  |  |  |  |  |
| **Multivariate Results:** | |  |  |  |  |
| **Characteristics** | | **Response** | | | |
| Discovery Cohort | | Validation Cohort | |
| OR(95%CI) | p.value | HR(95%CI) | p.value |
| **Age** | ≥ 65 | Reference |  | / | / |
|  | < 65 | 2.11 (1.24-3.60) | 0.006 | / | / |
| **Drug type** | Anti-CTLA-4 | Reference |  | / | / |
|  | Anti-PD-1/PD-L1 | 0.28 (0.15-0.53) | <0.001 | / | / |
|  | Anti-PD-1/PD-L1+CTLA-4 | 0.37 (0.18-0.77) | 0.008 | / | / |
| **NTRK3** | Wild | Reference |  | Reference |  |
|  | Mut | 0.34 (0.12-0.92) | 0.031 | 0.24 (0.07-0.81) | 0.019 |
