# Supplementary material for: Evaluation of NTRK3 mutation and a mutation-based gene set as biomarkers for immunotherapy outcomes in multiple cancers
Source: Research Square preprint supplement (doi:10.21203/rs.3.rs-7437970/v1), 2025-11-24
Supplement: Supplementary file 2 [file 1cd5d8615455303ffe6cf818.docx]

| **Table 1. Patient characteristics in the discovery and validation cohort** | | |
| --- | --- | --- |
| **Characteristics** | **Discovery cohort** | **Validation cohort** |
| **No. of patients** | 642 | 1572 |
| **Age, years n (%)** |  |  |
| < 65 | 188 (29.3) | 871 (55.4) |
| >=65 | 148 (23.1) | 700 (44.5) |
| **Sex, n (%)** |  |  |
| Male | 347 (54.0) | 989 (62.9) |
| Female | 227 (35.4) | 583 (37.1) |
| **Cancer type, n (%)** |  |  |
| Non-small cell lung cancer | 131 (20.4) | 350 (22.3) |
| Melanoma | 437 (68.1) | 320 (20.4) |
| Other | 74 (11.5) | 902 (57.4) |
| **Drug, n (%)** |  |  |
| PD-(L)1 | 376 (58.6) | 1230 (78.2) |
| CTLA4 | 182 (28.3) | 98 (6.2) |
| PD-(L)1 + CTLA4 | 84 (13.1) | 244 (15.5) |
| **Treatment best response, n (%)** |  |  |
| CR/PR | 191 (29.8) | 52 (3.3) |
| PD/SD | 414 (64.5) | 195 (12.4) |
| **Durable clinical benefit, n (%)** |  |  |
| Benefit | 266 (41.4) | 119 (7.6) |
| Non-benefit | 339 (52.8) | 128 (8.1) |
| **Tumor mutational burden, n (%)** |  |  |
| ≤10 | 357 (55.6) | 1137 (72.3) |
| >10 | 217 (33.8) | 435 (27.7) |
| **NTRK3 status, n (%)** |  |  |
| Wild type | 592 (92.2) | 1503 (95.6) |
| Mutant | 50 (7.8) | 69 (4.4) |
