# Supplementary material for: Evaluation of NTRK3 mutation and a mutation-based gene set as biomarkers for immunotherapy outcomes in multiple cancers
Source: Research Square preprint supplement (doi:10.21203/rs.3.rs-7437970/v1), 2025-11-24
Supplement: Supplementary file 3 [file 8138a637dc4da33e6b91b5d5.xlsx]

## Sheet: Table S1
Table S1: The clinical data for each sample used in the discovery cohort.
Sample.ID	Cohort	Cancer_type	NTRK3	Drug_type	Age	Gender	Overall.survival	Survival.status	Progression.free.survival	Progression..status	Best.treatment.response	TMB_NONSYNONYMOUS
Pt16	Hugo et al. (PMID 26997480)	Melanoma	Wild	Anti-PD-1/PD-L1	19	Male	6.2	1	NA	NA	PD	18.7
Pt14	Hugo et al. (PMID 26997480)	Melanoma	Wild	Anti-PD-1/PD-L1	27	Female	1.8	0	NA	NA	PD	40.9
Pt11	Hugo et al. (PMID 26997480)	Melanoma	Wild	Anti-PD-1/PD-L1	37	Male	15.5667	1	NA	NA	PD	8.66667
Pt34	Hugo et al. (PMID 26997480)	Melanoma	Wild	Anti-PD-1/PD-L1	42	Male	13.9333	0	NA	NA	CR	3.83333
Pt19	Hugo et al. (PMID 26997480)	Melanoma	Wild	Anti-PD-1/PD-L1	45	Male	35.3333	0	NA	NA	PR	22.5333
Pt32	Hugo et al. (PMID 26997480)	Melanoma	Wild	Anti-PD-1/PD-L1	47	Male	5.7	1	NA	NA	PD	5.8
Pt31	Hugo et al. (PMID 26997480)	Melanoma	Wild	Anti-PD-1/PD-L1	47	Male	23.4667	0	NA	NA	PD	19.1
Pt6	Hugo et al. (PMID 26997480)	Melanoma	Wild	Anti-PD-1/PD-L1	51	Male	29.4	0	NA	NA	PR	8.26667
Pt13	Hugo et al. (PMID 26997480)	Melanoma	Wild	Anti-PD-1/PD-L1	53	Female	30.5667	0	NA	NA	CR	16.5333
Pt22	Hugo et al. (PMID 26997480)	Melanoma	Wild	Anti-PD-1/PD-L1	55	Male	6.06667	1	NA	NA	PD	8.3
Pt7	Hugo et al. (PMID 26997480)	Melanoma	Wild	Anti-PD-1/PD-L1	55	Female	22.0667	1	NA	NA	PD	41.7
Pt2	Hugo et al. (PMID 26997480)	Melanoma	Wild	Anti-PD-1/PD-L1	55	Male	30.9	0	NA	NA	PR	68.3667
Pt38	Hugo et al. (PMID 26997480)	Melanoma	Wild	Anti-PD-1/PD-L1	57	Female	14.9333	0	NA	NA	PR	4.66667
Pt3	Hugo et al. (PMID 26997480)	Melanoma	Wild	Anti-PD-1/PD-L1	58	Male	23.0333	1	NA	NA	PR	27.8
Pt12	Hugo et al. (PMID 26997480)	Melanoma	Wild	Anti-PD-1/PD-L1	59	Male	10.9	1	NA	NA	PD	4.5
Pt21	Hugo et al. (PMID 26997480)	Melanoma	Wild	Anti-PD-1/PD-L1	60	Male	31.5	1	NA	NA	PR	3.56667
Pt10	Hugo et al. (PMID 26997480)	Melanoma	Wild	Anti-PD-1/PD-L1	60	Male	12.9	0	NA	NA	PD	8.26667
Pt36	Hugo et al. (PMID 26997480)	Melanoma	Wild	Anti-PD-1/PD-L1	61	Female	27.9	1	NA	NA	PD	3.46667
Pt5	Hugo et al. (PMID 26997480)	Melanoma	Wild	Anti-PD-1/PD-L1	61	Male	14.6333	0	NA	NA	PR	11.3333
Pt4	Hugo et al. (PMID 26997480)	Melanoma	Wild	Anti-PD-1/PD-L1	62	Male	31.6	0	NA	NA	PR	136.833
Pt23	Hugo et al. (PMID 26997480)	Melanoma	Wild	Anti-PD-1/PD-L1	63	Male	3.43333	1	NA	NA	PD	10.4
Pt20	Hugo et al. (PMID 26997480)	Melanoma	Wild	Anti-PD-1/PD-L1	63	Female	11.2333	1	NA	NA	PD	22.7333
Pt18	Hugo et al. (PMID 26997480)	Melanoma	Wild	Anti-PD-1/PD-L1	64	Male	36.0333	0	NA	NA	PR	6.33333
Pt35	Hugo et al. (PMID 26997480)	Melanoma	Wild	Anti-PD-1/PD-L1	65	Female	14.2333	0	NA	NA	PR	8.03333
Pt1	Hugo et al. (PMID 26997480)	Melanoma	Wild	Anti-PD-1/PD-L1	66	Female	20.2333	1	NA	NA	PD	63
Pt17	Hugo et al. (PMID 26997480)	Melanoma	Wild	Anti-PD-1/PD-L1	67	Male	31.7667	1	NA	NA	PD	22.7
Pt9	Hugo et al. (PMID 26997480)	Melanoma	Wild	Anti-PD-1/PD-L1	68	Male	35.1333	0	NA	NA	CR	19.4
Pt24	Hugo et al. (PMID 26997480)	Melanoma	Wild	Anti-PD-1/PD-L1	70	Male	32.4667	1	NA	NA	PR	12.7333
Pt37	Hugo et al. (PMID 26997480)	Melanoma	Wild	Anti-PD-1/PD-L1	70	Female	12.1333	0	NA	NA	PR	15.7
Pt15	Hugo et al. (PMID 26997480)	Melanoma	Wild	Anti-PD-1/PD-L1	70	Male	32.6667	1	NA	NA	PR	26.7667
Pt26	Hugo et al. (PMID 26997480)	Melanoma	Wild	Anti-PD-1/PD-L1	71	Male	44.5333	0	NA	NA	CR	41.7
Pt25	Hugo et al. (PMID 26997480)	Melanoma	Wild	Anti-PD-1/PD-L1	74	Male	8.73333	1	NA	NA	PD	5.1
Pt30	Hugo et al. (PMID 26997480)	Melanoma	Wild	Anti-PD-1/PD-L1	80	Female	3.33333	1	NA	NA	PD	18.5667
Pt33	Hugo et al. (PMID 26997480)	Melanoma	Wild	Anti-PD-1/PD-L1	80	Female	72.5667	0	NA	NA	CR	23.6333
Pt28	Hugo et al. (PMID 26997480)	Melanoma	Wild	Anti-PD-1/PD-L1	82	Male	14.6333	1	NA	NA	PR	30.0333
Pt27	Hugo et al. (PMID 26997480)	Melanoma	Wild	Anti-PD-1/PD-L1	83	Male	18.2667	0	NA	NA	CR	37.8667
Pt29	Hugo et al. (PMID 26997480)	Melanoma	Wild	Anti-PD-1/PD-L1	84	Male	8.96667	1	NA	NA	PD	10
Patient33	Liu et al. (PMID 31792460)	Melanoma	Wild	Anti-PD-1/PD-L1	NA	Female	55.9667	0	55.9667	0	PR	0.3
Patient166	Liu et al. (PMID 31792460)	Melanoma	Wild	Anti-PD-1/PD-L1	NA	Female	6.83333	1	6.83333	0	PR	0.333333
Patient39	Liu et al. (PMID 31792460)	Melanoma	Wild	Anti-PD-1/PD-L1	NA	Male	31.2333	0	31.2333	0	SD	0.366667
Patient56	Liu et al. (PMID 31792460)	Melanoma	Wild	Anti-PD-1/PD-L1	NA	Male	4.06667	1	2.36667	1	PD	0.566667
Patient34	Liu et al. (PMID 31792460)	Melanoma	Wild	Anti-PD-1/PD-L1	NA	Male	56.3667	0	8	1	PR	0.6
Patient1	Liu et al. (PMID 31792460)	Melanoma	Wild	Anti-PD-1/PD-L1	NA	Female	9.43333	1	3.1	1	PD	0.666667
Patient188	Liu et al. (PMID 31792460)	Melanoma	Wild	Anti-PD-1/PD-L1	NA	Male	2.46667	1	0.766667	1	PD	0.733333
Patient150	Liu et al. (PMID 31792460)	Melanoma	Wild	Anti-PD-1/PD-L1	NA	Male	22.8333	0	22.8333	0	PR	0.8
Patient48	Liu et al. (PMID 31792460)	Melanoma	Wild	Anti-PD-1/PD-L1	NA	Female	1.76667	1	1.66667	1	PD	0.933333
Patient14	Liu et al. (PMID 31792460)	Melanoma	Wild	Anti-PD-1/PD-L1	NA	Female	6.2	1	2.53333	1	PD	1
Patient168	Liu et al. (PMID 31792460)	Melanoma	Wild	Anti-PD-1/PD-L1	NA	Male	20.7667	0	19.3333	0	PR	1.06667
Patient117	Liu et al. (PMID 31792460)	Melanoma	Wild	Anti-PD-1/PD-L1	NA	Female	9.83333	1	3.33333	1	PD	1.13333
Patient80	Liu et al. (PMID 31792460)	Melanoma	Wild	Anti-PD-1/PD-L1	NA	Male	16.7333	1	2.56667	1	PD	1.13333
Patient88	Liu et al. (PMID 31792460)	Melanoma	Wild	Anti-PD-1/PD-L1	NA	Male	2.46667	1	2.3	1	PD	1.23333
Patient38	Liu et al. (PMID 31792460)	Melanoma	Wild	Anti-PD-1/PD-L1	NA	Male	11.4333	1	3.26667	1	PD	1.26667
Patient35	Liu et al. (PMID 31792460)	Melanoma	Wild	Anti-PD-1/PD-L1	NA	Male	32.2667	1	6.03333	1	SD	1.3
Patient37	Liu et al. (PMID 31792460)	Melanoma	Wild	Anti-PD-1/PD-L1	NA	Male	9.16667	1	2.56667	1	PD	1.33333
Patient167	Liu et al. (PMID 31792460)	Melanoma	Wild	Anti-PD-1/PD-L1	NA	Female	9.4	1	1.9	1	PD	1.4
Patient78	Liu et al. (PMID 31792460)	Melanoma	Wild	Anti-PD-1/PD-L1	NA	Female	11.8667	1	2.86667	1	PD	1.43333
Patient108	Liu et al. (PMID 31792460)	Melanoma	Wild	Anti-PD-1/PD-L1	NA	Male	5.5	1	2.56667	1	PD	1.46667
Patient142	Liu et al. (PMID 31792460)	Melanoma	Wild	Anti-PD-1/PD-L1	NA	Female	33.2	0	33.2	0	SD	1.63333
Patient159	Liu et al. (PMID 31792460)	Melanoma	Wild	Anti-PD-1/PD-L1	NA	Female	9.6	0	7.2	1	SD	1.63333
Patient84	Liu et al. (PMID 31792460)	Melanoma	Wild	Anti-PD-1/PD-L1	NA	Female	5.46667	1	2.76667	1	PD	1.63333
Patient189	Liu et al. (PMID 31792460)	Melanoma	Wild	Anti-PD-1/PD-L1	NA	Female	23.9333	0	13.5333	1	PR	1.66667
Patient125	Liu et al. (PMID 31792460)	Melanoma	Wild	Anti-PD-1/PD-L1	NA	Male	32.6	0	32.6	0	CR	1.86667
Patient170	Liu et al. (PMID 31792460)	Melanoma	Wild	Anti-PD-1/PD-L1	NA	Male	11.5667	0	11.5667	0	SD	1.9
Patient22	Liu et al. (PMID 31792460)	Melanoma	Wild	Anti-PD-1/PD-L1	NA	Male	8.43333	1	3.03333	1	PD	1.9
Patient197	Liu et al. (PMID 31792460)	Melanoma	Wild	Anti-PD-1/PD-L1	NA	Female	32	0	2.96667	1	PR	2
Patient201	Liu et al. (PMID 31792460)	Melanoma	Wild	Anti-PD-1/PD-L1	NA	Male	5.56667	1	2.3	1	PD	2
Patient141	Liu et al. (PMID 31792460)	Melanoma	Wild	Anti-PD-1/PD-L1	NA	Female	29.1667	0	29.1667	0	PR	2.03333
Patient44	Liu et al. (PMID 31792460)	Melanoma	Wild	Anti-PD-1/PD-L1	NA	Male	30.7333	0	30.7333	0	PR	2.16667
Patient10	Liu et al. (PMID 31792460)	Melanoma	Wild	Anti-PD-1/PD-L1	NA	Female	37.9667	1	5.63333	1	PR	2.36667
Patient154	Liu et al. (PMID 31792460)	Melanoma	XMut	Anti-PD-1/PD-L1	NA	Female	21.1667	0	8.36667	1	SD	2.36667
Patient203	Liu et al. (PMID 31792460)	Melanoma	Wild	Anti-PD-1/PD-L1	NA	Male	20.8667	1	3.3	1	PD	2.36667
Patient173	Liu et al. (PMID 31792460)	Melanoma	Wild	Anti-PD-1/PD-L1	NA	Female	1.4	1	0.533333	1	PD	2.4
Patient67	Liu et al. (PMID 31792460)	Melanoma	Wild	Anti-PD-1/PD-L1	NA	Female	4.53333	1	3.13333	1	PD	2.43333
Patient7	Liu et al. (PMID 31792460)	Melanoma	Wild	Anti-PD-1/PD-L1	NA	Male	8.96667	1	7.23333	1	SD	2.53333
Patient119	Liu et al. (PMID 31792460)	Melanoma	XMut	Anti-PD-1/PD-L1	NA	Female	8.66667	1	2.46667	1	PD	2.7
Patient43	Liu et al. (PMID 31792460)	Melanoma	XMut	Anti-PD-1/PD-L1	NA	Male	30.8333	0	25	1	PR	2.8
Patient63	Liu et al. (PMID 31792460)	Melanoma	Wild	Anti-PD-1/PD-L1	NA	Female	5.93333	1	2.96667	1	PD	2.9
Patient87	Liu et al. (PMID 31792460)	Melanoma	Wild	Anti-PD-1/PD-L1	NA	Female	42.1	0	38.0667	1	PR	2.9
Patient73	Liu et al. (PMID 31792460)	Melanoma	Wild	Anti-PD-1/PD-L1	NA	Male	28.2	1	2.83333	1	PD	3
Patient77	Liu et al. (PMID 31792460)	Melanoma	Wild	Anti-PD-1/PD-L1	NA	Female	14.8	1	3.16667	1	PD	3.03333
Patient58	Liu et al. (PMID 31792460)	Melanoma	XMut	Anti-PD-1/PD-L1	NA	Male	10.1	1	2.56667	1	PD	3.06667
Patient104	Liu et al. (PMID 31792460)	Melanoma	Wild	Anti-PD-1/PD-L1	NA	Female	26.3	0	26.3	0	PR	3.2
Patient21	Liu et al. (PMID 31792460)	Melanoma	Wild	Anti-PD-1/PD-L1	NA	Female	30.2	0	30.2	0	PR	3.46667
Patient72	Liu et al. (PMID 31792460)	Melanoma	Wild	Anti-PD-1/PD-L1	NA	Male	13.1667	0	2.23333	1	PD	4.03333
Patient100	Liu et al. (PMID 31792460)	Melanoma	Wild	Anti-PD-1/PD-L1	NA	Female	31.2667	1	30.7333	0	PR	4.2
Patient105	Liu et al. (PMID 31792460)	Melanoma	Wild	Anti-PD-1/PD-L1	NA	Female	17.3667	1	12.6	0	NA	4.2
Patient23	Liu et al. (PMID 31792460)	Melanoma	Wild	Anti-PD-1/PD-L1	NA	Male	32.5	0	2.56667	1	PD	4.36667
Patient187	Liu et al. (PMID 31792460)	Melanoma	XMut	Anti-PD-1/PD-L1	NA	Female	20.5667	0	20.5667	0	CR	4.43333
Patient185	Liu et al. (PMID 31792460)	Melanoma	Wild	Anti-PD-1/PD-L1	NA	Male	6.76667	0	6.76667	0	SD	5.26667
Patient107	Liu et al. (PMID 31792460)	Melanoma	Wild	Anti-PD-1/PD-L1	NA	Male	1.56667	1	1.56667	1	PR	5.3
Patient30	Liu et al. (PMID 31792460)	Melanoma	Wild	Anti-PD-1/PD-L1	NA	Female	7.1	1	4.43333	1	SD	5.33333
Patient31	Liu et al. (PMID 31792460)	Melanoma	Wild	Anti-PD-1/PD-L1	NA	Male	14.2	1	2.83333	1	PD	5.53333
Patient11	Liu et al. (PMID 31792460)	Melanoma	Wild	Anti-PD-1/PD-L1	NA	Female	5.33333	1	2.83333	1	PD	5.66667
Patient182	Liu et al. (PMID 31792460)	Melanoma	Wild	Anti-PD-1/PD-L1	NA	Female	24.9333	1	2.8	1	PD	5.73333
Patient15	Liu et al. (PMID 31792460)	Melanoma	Wild	Anti-PD-1/PD-L1	NA	Female	4.96667	1	3.5	1	PR	6
Patient36	Liu et al. (PMID 31792460)	Melanoma	Wild	Anti-PD-1/PD-L1	NA	Male	15.0333	1	2.1	1	PD	6.03333
Patient8	Liu et al. (PMID 31792460)	Melanoma	Wild	Anti-PD-1/PD-L1	NA	Male	33.5	1	31.8333	1	SD	6.36667
Patient83	Liu et al. (PMID 31792460)	Melanoma	Wild	Anti-PD-1/PD-L1	NA	Male	2.36667	1	2.36667	1	PD	6.5
Patient50	Liu et al. (PMID 31792460)	Melanoma	Wild	Anti-PD-1/PD-L1	NA	Female	5.83333	1	3.5	1	NA	6.56667
Patient156	Liu et al. (PMID 31792460)	Melanoma	Wild	Anti-PD-1/PD-L1	NA	Male	2.9	1	2.66667	1	PD	6.73333
Patient163	Liu et al. (PMID 31792460)	Melanoma	Wild	Anti-PD-1/PD-L1	NA	Male	5.76667	1	1.6	1	PD	6.73333
Patient79	Liu et al. (PMID 31792460)	Melanoma	Wild	Anti-PD-1/PD-L1	NA	Female	28.3	0	2.8	1	PD	6.73333
Patient149	Liu et al. (PMID 31792460)	Melanoma	Wild	Anti-PD-1/PD-L1	NA	Male	16.5667	1	7	1	SD	7.33333
Patient27	Liu et al. (PMID 31792460)	Melanoma	Wild	Anti-PD-1/PD-L1	NA	Male	14.3667	1	3.13333	1	PD	7.33333
Patient118	Liu et al. (PMID 31792460)	Melanoma	Wild	Anti-PD-1/PD-L1	NA	Female	43.8667	0	43.8667	0	PR	7.36667
Patient116	Liu et al. (PMID 31792460)	Melanoma	Wild	Anti-PD-1/PD-L1	NA	Female	3.93333	1	2.13333	1	PD	7.66667
Patient112	Liu et al. (PMID 31792460)	Melanoma	Wild	Anti-PD-1/PD-L1	NA	Female	17.3667	1	3.03333	1	PD	8.03333
Patient102	Liu et al. (PMID 31792460)	Melanoma	Wild	Anti-PD-1/PD-L1	NA	Male	26.1667	0	5.86667	1	NA	8.2
Patient106	Liu et al. (PMID 31792460)	Melanoma	Wild	Anti-PD-1/PD-L1	NA	Female	26	0	26	0	CR	8.23333
Patient155	Liu et al. (PMID 31792460)	Melanoma	Wild	Anti-PD-1/PD-L1	NA	Male	15.8333	0	3.76667	1	PD	8.46667
Patient94	Liu et al. (PMID 31792460)	Melanoma	Wild	Anti-PD-1/PD-L1	NA	Female	1.33333	1	1.33333	1	PD	8.9
Patient32	Liu et al. (PMID 31792460)	Melanoma	Wild	Anti-PD-1/PD-L1	NA	Female	1.76667	1	1.63333	1	PD	9.03333
Patient181	Liu et al. (PMID 31792460)	Melanoma	Wild	Anti-PD-1/PD-L1	NA	Female	15.8667	0	15.8667	0	CR	9.16667
Patient24	Liu et al. (PMID 31792460)	Melanoma	Wild	Anti-PD-1/PD-L1	NA	Male	4.56667	1	1.03333	1	PD	9.23333
Patient86	Liu et al. (PMID 31792460)	Melanoma	Wild	Anti-PD-1/PD-L1	NA	Male	44.2333	0	44.2333	1	SD	9.23333
Patient130	Liu et al. (PMID 31792460)	Melanoma	Wild	Anti-PD-1/PD-L1	NA	Female	6.4	1	4.13333	1	PD	9.4
Patient45	Liu et al. (PMID 31792460)	Melanoma	Wild	Anti-PD-1/PD-L1	NA	Male	55.5333	0	55.5333	0	PR	9.56667
Patient54	Liu et al. (PMID 31792460)	Melanoma	Wild	Anti-PD-1/PD-L1	NA	Male	33.9	1	14.3	1	NA	9.56667
Patient145	Liu et al. (PMID 31792460)	Melanoma	Wild	Anti-PD-1/PD-L1	NA	Male	27.7667	0	27.7667	0	CR	9.7
Patient98	Liu et al. (PMID 31792460)	Melanoma	Wild	Anti-PD-1/PD-L1	NA	Female	22.7667	1	2.43333	1	PD	10.0667
Patient131	Liu et al. (PMID 31792460)	Melanoma	Wild	Anti-PD-1/PD-L1	NA	Male	27.7667	0	27.7667	0	PR	10.3333
Patient59	Liu et al. (PMID 31792460)	Melanoma	Wild	Anti-PD-1/PD-L1	NA	Male	6.36667	1	2.73333	1	PD	10.5
Patient148	Liu et al. (PMID 31792460)	Melanoma	Wild	Anti-PD-1/PD-L1	NA	Female	26.4	0	26.4	0	PR	10.8333
Patient183	Liu et al. (PMID 31792460)	Melanoma	Wild	Anti-PD-1/PD-L1	NA	Male	19.0667	1	2.8	1	PD	10.9
Patient25	Liu et al. (PMID 31792460)	Melanoma	Wild	Anti-PD-1/PD-L1	NA	Male	36.5333	0	25.0667	1	PR	10.9
Patient134	Liu et al. (PMID 31792460)	Melanoma	Wild	Anti-PD-1/PD-L1	NA	Male	19.6667	1	2.1	1	PD	10.9333
Patient143	Liu et al. (PMID 31792460)	Melanoma	Wild	Anti-PD-1/PD-L1	NA	Male	21	0	5.1	1	PD	11.1
Patient133	Liu et al. (PMID 31792460)	Melanoma	Wild	Anti-PD-1/PD-L1	NA	Male	12.3333	1	2.1	1	PD	11.3667
Patient18	Liu et al. (PMID 31792460)	Melanoma	Wild	Anti-PD-1/PD-L1	NA	Male	4.33333	1	2.86667	1	PD	11.4
Patient17	Liu et al. (PMID 31792460)	Melanoma	Wild	Anti-PD-1/PD-L1	NA	Male	22.8667	1	6.73333	1	SD	12.2
Patient146	Liu et al. (PMID 31792460)	Melanoma	Wild	Anti-PD-1/PD-L1	NA	Female	20.4	0	20.4	0	CR	12.4
Patient4	Liu et al. (PMID 31792460)	Melanoma	XMut	Anti-PD-1/PD-L1	NA	Male	20	1	19.1333	1	CR	12.7667
Patient135	Liu et al. (PMID 31792460)	Melanoma	Wild	Anti-PD-1/PD-L1	NA	Male	20.9333	0	20.9333	0	CR	12.8
Patient20	Liu et al. (PMID 31792460)	Melanoma	XMut	Anti-PD-1/PD-L1	NA	Female	8.06667	1	2.8	1	PD	13
Patient60	Liu et al. (PMID 31792460)	Melanoma	Wild	Anti-PD-1/PD-L1	NA	Male	22.0667	1	5.83333	1	SD	13.0333
Patient127	Liu et al. (PMID 31792460)	Melanoma	Wild	Anti-PD-1/PD-L1	NA	Male	28.8667	0	28.8667	0	CR	13.7333
Patient157	Liu et al. (PMID 31792460)	Melanoma	Wild	Anti-PD-1/PD-L1	NA	Male	4.76667	0	2.76667	1	PD	14.6667
Patient192	Liu et al. (PMID 31792460)	Melanoma	XMut	Anti-PD-1/PD-L1	NA	Female	9.66667	0	8.3	1	PR	15.2333
Patient179	Liu et al. (PMID 31792460)	Melanoma	Wild	Anti-PD-1/PD-L1	NA	Female	21.7667	0	11.2	1	PR	15.9333
Patient55	Liu et al. (PMID 31792460)	Melanoma	Wild	Anti-PD-1/PD-L1	NA	Male	50.1	0	50.1	0	PR	15.9667
Patient42	Liu et al. (PMID 31792460)	Melanoma	Wild	Anti-PD-1/PD-L1	NA	Male	34.2333	0	34.2333	0	CR	16.8667
Patient147	Liu et al. (PMID 31792460)	Melanoma	XMut	Anti-PD-1/PD-L1	NA	Male	32	0	32	0	CR	18.1
Patient205	Liu et al. (PMID 31792460)	Melanoma	XMut	Anti-PD-1/PD-L1	NA	Female	13.0667	1	6.33333	1	PD	18.9
Patient136	Liu et al. (PMID 31792460)	Melanoma	Wild	Anti-PD-1/PD-L1	NA	Male	23.2667	0	2.06667	1	PD	19.0333
Patient193	Liu et al. (PMID 31792460)	Melanoma	Wild	Anti-PD-1/PD-L1	NA	Female	21.9667	0	15.8667	1	SD	19.2
Patient180	Liu et al. (PMID 31792460)	Melanoma	Wild	Anti-PD-1/PD-L1	NA	Male	12.6667	1	11.4333	1	SD	19.3667
Patient13	Liu et al. (PMID 31792460)	Melanoma	Wild	Anti-PD-1/PD-L1	NA	Male	1.93333	1	1.46667	1	PD	19.6
Patient132	Liu et al. (PMID 31792460)	Melanoma	Wild	Anti-PD-1/PD-L1	NA	Male	24.6333	0	12.9667	1	CR	21
Patient165	Liu et al. (PMID 31792460)	Melanoma	Wild	Anti-PD-1/PD-L1	NA	Male	2.5	0	0.433333	1	PD	21.4667
Patient96	Liu et al. (PMID 31792460)	Melanoma	Wild	Anti-PD-1/PD-L1	NA	Male	30.4333	0	30.4333	0	CR	21.4667
Patient126	Liu et al. (PMID 31792460)	Melanoma	Wild	Anti-PD-1/PD-L1	NA	Male	33.0667	0	24.7333	1	PR	21.6667
Patient9	Liu et al. (PMID 31792460)	Melanoma	Wild	Anti-PD-1/PD-L1	NA	Female	32.1	0	0.7	1	PD	21.8
Patient172	Liu et al. (PMID 31792460)	Melanoma	Wild	Anti-PD-1/PD-L1	NA	Male	9.06667	0	9.06667	1	SD	22.6667
Patient200	Liu et al. (PMID 31792460)	Melanoma	Wild	Anti-PD-1/PD-L1	NA	Male	17.0667	1	3.6	1	PD	24.3
Patient75	Liu et al. (PMID 31792460)	Melanoma	XMut	Anti-PD-1/PD-L1	NA	Male	29.7	0	29.7	1	PR	24.3333
Patient47	Liu et al. (PMID 31792460)	Melanoma	Wild	Anti-PD-1/PD-L1	NA	Female	31.2333	0	2.46667	1	PD	25.2667
Patient121	Liu et al. (PMID 31792460)	Melanoma	Wild	Anti-PD-1/PD-L1	NA	Female	43.5333	0	40.9333	1	PR	25.5667
Patient144	Liu et al. (PMID 31792460)	Melanoma	Wild	Anti-PD-1/PD-L1	NA	Male	22.0667	0	22.0667	0	PR	27.4333
Patient46	Liu et al. (PMID 31792460)	Melanoma	Wild	Anti-PD-1/PD-L1	NA	Male	29.8667	0	29.8667	0	SD	27.8667
Patient137	Liu et al. (PMID 31792460)	Melanoma	Wild	Anti-PD-1/PD-L1	NA	Female	25.7333	0	25.7333	0	CR	28.6
Patient99	Liu et al. (PMID 31792460)	Melanoma	Wild	Anti-PD-1/PD-L1	NA	Male	30.7	0	10.6333	1	PR	30.2
Patient6	Liu et al. (PMID 31792460)	Melanoma	Wild	Anti-PD-1/PD-L1	NA	Female	22.9	1	4.13333	1	SD	31
Patient110	Liu et al. (PMID 31792460)	Melanoma	XMut	Anti-PD-1/PD-L1	NA	Female	16.8667	0	3.13333	1	PD	33.5
Patient120	Liu et al. (PMID 31792460)	Melanoma	Wild	Anti-PD-1/PD-L1	NA	Female	43.7	0	43.7	0	CR	36.1667
Patient51	Liu et al. (PMID 31792460)	Melanoma	Wild	Anti-PD-1/PD-L1	NA	Male	51.5667	0	15.7	1	PR	37.7333
Patient169	Liu et al. (PMID 31792460)	Melanoma	Wild	Anti-PD-1/PD-L1	NA	Male	18.1	0	18.1	0	PR	45.8
Patient82	Liu et al. (PMID 31792460)	Melanoma	XMut	Anti-PD-1/PD-L1	NA	Male	4.36667	1	2.96667	1	PD	49.2667
Patient162	Liu et al. (PMID 31792460)	Melanoma	Wild	Anti-PD-1/PD-L1	NA	Male	6.7	1	1.76667	1	PD	52.2333
Patient49	Liu et al. (PMID 31792460)	Melanoma	Wild	Anti-PD-1/PD-L1	NA	Female	54.5	0	9.33333	1	PR	53.8333
Patient196	Liu et al. (PMID 31792460)	Melanoma	Wild	Anti-PD-1/PD-L1	NA	Male	2.7	1	2.7	1	PD	57.7667
Patient204	Liu et al. (PMID 31792460)	Melanoma	XMut	Anti-PD-1/PD-L1	NA	Male	27.3	0	21	0	CR	58.8667
Patient195	Liu et al. (PMID 31792460)	Melanoma	Wild	Anti-PD-1/PD-L1	NA	Male	29.8333	0	29.8333	0	PR	65.5
Patient184	Liu et al. (PMID 31792460)	Melanoma	Wild	Anti-PD-1/PD-L1	NA	Male	17.1	0	12.4	0	CR	66.1
Patient140	Liu et al. (PMID 31792460)	Melanoma	Wild	Anti-PD-1/PD-L1	NA	Male	11.7	1	2.23333	1	PD	69.2
Patient61	Liu et al. (PMID 31792460)	Melanoma	XMut	Anti-PD-1/PD-L1	NA	Female	32.9	0	32.9	0	SD	70.4333
Patient158	Liu et al. (PMID 31792460)	Melanoma	Wild	Anti-PD-1/PD-L1	NA	Male	6.46667	0	5.4	1	PR	76.6333
Patient191	Liu et al. (PMID 31792460)	Melanoma	XMut	Anti-PD-1/PD-L1	NA	Male	21.9333	0	21.9333	0	PR	140.633
Patient206	Liu et al. (PMID 31792460)	Melanoma	Wild	Anti-PD-1/PD-L1	NA	Male	3	1	1.4	1	PD	180.3
Patient40	Liu et al. (PMID 31792460)	Melanoma	XMut	Anti-PD-1/PD-L1	NA	Female	15.6	1	2.1	1	PD	202.833
Patient62	Liu et al. (PMID 31792460)	Melanoma	XMut	Anti-PD-1/PD-L1	NA	Female	33.3667	0	33.3667	0	PR	208.167
Patient41	Liu et al. (PMID 31792460)	Melanoma	XMut	Anti-PD-1/PD-L1	NA	Male	56.1667	0	3.53333	1	PR	328.167
RCC_85-Tumor-SM-A46EQ	Miao et la. (PMID 29301960)	Renal cell carcinoma	Wild	Anti-PD-1/PD-L1	36	Male	23.7333	1	1.4	0	SD	1.76667
RCC_62-Tumor-SM-A46FI	Miao et la. (PMID 29301960)	Renal cell carcinoma	Wild	Anti-PD-1/PD-L1	48	Female	3.53333	0	2.9	1	SD	2.7
RCC_1-Tumor-SM-A46EX	Miao et la. (PMID 29301960)	Renal cell carcinoma	Wild	Anti-PD-1/PD-L1	49	Male	1.43333	0	1.26667	1	PD	1.96667
RCC_11-Tumor-SM-A46F1	Miao et la. (PMID 29301960)	Renal cell carcinoma	Wild	Anti-PD-1/PD-L1	50	Male	34.1333	0	4.06667	1	SD	1.93333
RCC_99-Tumor-SM-A46F7	Miao et la. (PMID 29301960)	Renal cell carcinoma	Wild	Anti-PD-1/PD-L1	50	Male	1.36667	1	1.36667	1	PD	3.4
RCC_97-Tumor-SM-A46EW	Miao et la. (PMID 29301960)	Renal cell carcinoma	Wild	Anti-PD-1/PD-L1	54	Male	29.0333	0	1.23333	1	PD	2.6
RCC_90-Tumor-SM-A46F3	Miao et la. (PMID 29301960)	Renal cell carcinoma	Wild	Anti-PD-1/PD-L1	54	Male	16.6333	1	1.2	1	PD	3.33333
RCC_58-Tumor-SM-A46FJ	Miao et la. (PMID 29301960)	Renal cell carcinoma	Wild	Anti-PD-1/PD-L1	55	Female	32.9333	0	22.9	0	PR	2
RCC_84-Tumor-SM-A46FL	Miao et la. (PMID 29301960)	Renal cell carcinoma	Wild	Anti-PD-1/PD-L1	55	Female	22.6667	1	2.93333	1	SD	2.83333
RCC_114-Tumor-SM-A46FO	Miao et la. (PMID 29301960)	Renal cell carcinoma	Wild	Anti-PD-1/PD-L1	57	Female	11.3333	0	6.93333	1	PR	1.9
RCC_117-Tumor-SM-A46FP	Miao et la. (PMID 29301960)	Renal cell carcinoma	Wild	Anti-PD-1/PD-L1	58	Male	2.13333	0	1.26667	0	SD	2.03333
RCC_14-Tumor-SM-A46F5	Miao et la. (PMID 29301960)	Renal cell carcinoma	XMut	Anti-PD-1/PD-L1	59	Male	34.1667	0	18.0333	1	PR	2.83333
RCC_27-Tumor-SM-A46ES	Miao et la. (PMID 29301960)	Renal cell carcinoma	Wild	Anti-PD-1/PD-L1	59	Male	32.2667	0	1.16667	1	PD	3.13333
RCC_115-Tumor-SM-A46FY	Miao et la. (PMID 29301960)	Renal cell carcinoma	Wild	Anti-PD-1/PD-L1	60	Male	12.2	0	2.9	1	SD	2.03333
RCC_79-Tumor-SM-A46ER	Miao et la. (PMID 29301960)	Renal cell carcinoma	Wild	Anti-PD-1/PD-L1	61	Female	29.1	0	4.33333	1	SD	1.76667
RCC_106-Tumor-SM-A46FT	Miao et la. (PMID 29301960)	Renal cell carcinoma	Wild	Anti-PD-1/PD-L1	61	Female	29	0	27.3667	0	PR	2.3
RCC_56-Tumor-SM-A46EJ	Miao et la. (PMID 29301960)	Renal cell carcinoma	Wild	Anti-PD-1/PD-L1	62	Female	33.0667	0	2.7	1	SD	3.23333
RCC_52-Tumor-SM-A46EU	Miao et la. (PMID 29301960)	Renal cell carcinoma	Wild	Anti-PD-1/PD-L1	63	Female	33.1667	0	8.2	1	SD	2.93333
RCC_50-Tumor-SM-A46EK	Miao et la. (PMID 29301960)	Renal cell carcinoma	Wild	Anti-PD-1/PD-L1	63	Female	32.7333	0	2.86667	1	SD	4.13333
RCC_21-Tumor-SM-A46FB	Miao et la. (PMID 29301960)	Renal cell carcinoma	Wild	Anti-PD-1/PD-L1	64	Male	11.6333	0	1.43333	0	SD	2.76667
RCC_10-Tumor-SM-A46EN	Miao et la. (PMID 29301960)	Renal cell carcinoma	Wild	Anti-PD-1/PD-L1	64	Female	35.2667	0	5.76667	0	SD	2.83333
RCC_93-Tumor-SM-A46F8	Miao et la. (PMID 29301960)	Renal cell carcinoma	Wild	Anti-PD-1/PD-L1	64	Male	22.8	1	16.6667	1	PR	3
RCC_105-Tumor-SM-A46FA	Miao et la. (PMID 29301960)	Renal cell carcinoma	Wild	Anti-PD-1/PD-L1	64	Male	3.93333	1	1.5	1	PD	3.46667
RCC_102-Tumor-SM-A46FM	Miao et la. (PMID 29301960)	Renal cell carcinoma	Wild	Anti-PD-1/PD-L1	64	Male	5.5	0	3.6	1	SD	3.63333
RCC_32-Tumor-SM-A46FH	Miao et la. (PMID 29301960)	Renal cell carcinoma	Wild	Anti-PD-1/PD-L1	65	Male	8	1	7.1	0	SD	2.8
RCC_41-Tumor-SM-A46FE	Miao et la. (PMID 29301960)	Renal cell carcinoma	Wild	Anti-PD-1/PD-L1	66	Male	6.5	0	1.4	1	PD	2.43333
RCC_18-Tumor-SM-A46EL	Miao et la. (PMID 29301960)	Renal cell carcinoma	Wild	Anti-PD-1/PD-L1	68	Male	3.7	0	1.43333	1	PD	1.96667
RCC_68-Tumor-SM-A46FC	Miao et la. (PMID 29301960)	Renal cell carcinoma	Wild	Anti-PD-1/PD-L1	69	Male	24.6667	1	1.3	1	PD	3.36667
RCC_119-Tumor-SM-A46FX	Miao et la. (PMID 29301960)	Renal cell carcinoma	Wild	Anti-PD-1/PD-L1	72	Male	25.7667	0	13.8	1	PR	2
RCC_39-Tumor-SM-A46EP	Miao et la. (PMID 29301960)	Renal cell carcinoma	Wild	Anti-PD-1/PD-L1	72	Male	10.2	1	1.23333	1	PD	2.76667
RCC_25-Tumor-SM-A46EF	Miao et la. (PMID 29301960)	Renal cell carcinoma	Wild	Anti-PD-1/PD-L1	72	Female	5.56667	1	1.3	1	PD	3.7
RCC_15-Tumor-SM-A46EE	Miao et la. (PMID 29301960)	Renal cell carcinoma	Wild	Anti-PD-1/PD-L1	73	Female	33.7667	1	22.1	1	SD	2.43333
RCC_96-Tumor-SM-A46FW	Miao et la. (PMID 29301960)	Renal cell carcinoma	Wild	Anti-PD-1/PD-L1	75	Female	19.4	0	1.23333	1	PD	5.36667
RCC_20-Tumor-SM-A46EG	Miao et la. (PMID 29301960)	Renal cell carcinoma	Wild	Anti-PD-1/PD-L1	76	Male	35.5	0	34.0667	0	CR	1.63333
RCC_73-Tumor-SM-A46FG	Miao et la. (PMID 29301960)	Renal cell carcinoma	Wild	Anti-PD-1/PD-L1	77	Male	5.93333	1	1.93333	1	PD	1.46667
MEL-IPI_Pat129-Tumor-SM-5X2R7	Miao et la. (PMID 30150660)	Melanoma	Wild	Anti-CTLA-4	18	Male	17.73	0	2.24	0	PD	3.83333
MEL-IPI_Pat83-Tumor-SM-53U2W	Miao et la. (PMID 30150660)	Melanoma	Wild	Anti-CTLA-4	22	Male	33.78	0	3.52	1	PD	1.9
MEL-IPI_Pat77-Tumor-SM-4DK33	Miao et la. (PMID 30150660)	Melanoma	Wild	Anti-CTLA-4	22	Male	33.85	0	7.93	0	PR	12.4667
MEL-IPI_Pat127-Tumor-SM-5X2R5	Miao et la. (PMID 30150660)	Melanoma	Wild	Anti-CTLA-4	24	Female	10.92	1	3.95	1	PD	3.96667
MEL-IPI_Pat135-Tumor-SM-7A152	Miao et la. (PMID 30150660)	Melanoma	Wild	Anti-CTLA-4	29	Female	2.66	1	2.4	1	PD	6.1
MEL-IPI_Pat128-Tumor-SM-5X2R6	Miao et la. (PMID 30150660)	Melanoma	Wild	Anti-CTLA-4	30	Male	3.72	1	2.66	1	PD	2.76667
MEL-IPI_Pat166-Tumor-SM-7A15G	Miao et la. (PMID 30150660)	Melanoma	Wild	Anti-CTLA-4	31	Male	2.53	1	2.5	1	NA	1.26667
MEL-IPI_Pat15-Tumor-SM-4DK1B	Miao et la. (PMID 30150660)	Melanoma	Wild	Anti-CTLA-4	32	Male	1.64	1	1.02	1	PD	8.46667
MEL-IPI_Pat06-Tumor-SM-4DK12	Miao et la. (PMID 30150660)	Melanoma	Wild	Anti-CTLA-4	33	Male	5.3	1	2.53	1	PD	5.06667
MEL-IPI_Pat07-Tumor-SM-4DK13	Miao et la. (PMID 30150660)	Melanoma	Wild	Anti-CTLA-4	35	Male	34.54	0	23.72	0	SD	5.8
MEL-IPI_Pat99-Tumor-SM-4CU6M	Miao et la. (PMID 30150660)	Melanoma	Wild	Anti-CTLA-4	36	Female	11.58	1	2.7	1	PD	0.866667
MEL-IPI_Pat148-Tumor-SM-5VWJQ	Miao et la. (PMID 30150660)	Melanoma	Wild	Anti-CTLA-4	36	Female	2.76	1	1.58	1	PD	8.53333
MEL-IPI_Pat59-Tumor-SM-4DK2K	Miao et la. (PMID 30150660)	Melanoma	Wild	Anti-CTLA-4	36	Male	7.37	1	2.5	1	PD	9.06667
MEL-IPI_Pat49-Tumor-SM-4DK2A	Miao et la. (PMID 30150660)	Melanoma	Wild	Anti-CTLA-4	36	Male	34.01	0	5.36	1	SD	22.5333
MEL-IPI_Pat46-Tumor-SM-53U48	Miao et la. (PMID 30150660)	Melanoma	Wild	Anti-CTLA-4	37	Female	5.26	1	1.18	1	PD	9.63333
MEL-IPI_Pat138-Tumor-SM-7A155	Miao et la. (PMID 30150660)	Melanoma	Wild	Anti-CTLA-4	39	Female	48.62	1	19.11	1	SD	196.633
MEL-IPI_Pat67-Tumor-SM-4DK2S	Miao et la. (PMID 30150660)	Melanoma	Wild	Anti-CTLA-4	40	Male	2.6	1	2.6	1	PD	1
MEL-IPI_Pat12-Tumor-SM-7459O	Miao et la. (PMID 30150660)	Melanoma	Wild	Anti-CTLA-4	41	Male	9.54	1	2.76	1	PD	3.36667
MEL-IPI_Pat105-Tumor-SM-4CU6S	Miao et la. (PMID 30150660)	Melanoma	Wild	Anti-CTLA-4	41	Male	34.44	0	22.7	0	PR	4.8
NI9507	Miao et la. (PMID 30150660)	Non-small cell lung cancer	Wild	Anti-PD-1/PD-L1	41	Female	1.88	0	1.88	1	PD	2.5
MEL-IPI_Pat02-Tumor-SM-4DJZX	Miao et la. (PMID 30150660)	Melanoma	Wild	Anti-CTLA-4	42	Female	53.68	0	41.25	0	SD	7
MEL-IPI_Pat106-Tumor-SM-4CU6T	Miao et la. (PMID 30150660)	Melanoma	Wild	Anti-CTLA-4	43	Female	8.22	1	4.51	1	PD	0.766667
MEL-IPI_Pat118-Tumor-SM-5X2QV	Miao et la. (PMID 30150660)	Melanoma	Wild	Anti-CTLA-4	43	Female	10.3	1	3.95	1	PD	4.03333
SU2C_Lung-SU2C-DFCI-LUAD-1020-Tumor-SM-AOL3C	Miao et la. (PMID 30150660)	Non-small cell lung cancer	Wild	Anti-PD-1/PD-L1	43	Female	29.51	0	29.51	0	PR	3.86667
MEL-IPI_Pat17-Tumor-SM-4DK1D	Miao et la. (PMID 30150660)	Melanoma	Wild	Anti-CTLA-4	44	Male	6.74	1	2.8	1	PD	7.16667
MEL-IPI_Pat66-Tumor-SM-4DK2R	Miao et la. (PMID 30150660)	Melanoma	Wild	Anti-CTLA-4	44	Female	21.48	0	19.67	1	SD	10.9
MEL-IPI_Pat104-Tumor-SM-4CU6R	Miao et la. (PMID 30150660)	Melanoma	Wild	Anti-CTLA-4	45	Female	7.8	1	7.8	1	SD	1.23333
MEL-IPI_Pat115-Tumor-SM-5X2QS	Miao et la. (PMID 30150660)	Melanoma	Wild	Anti-CTLA-4	46	Male	4.77	1	2.43	1	PD	2.4
MEL-IPI_Pat87-Tumor-SM-4DK3D	Miao et la. (PMID 30150660)	Melanoma	Wild	Anti-CTLA-4	47	Male	35.95	0	4.97	1	PD	1.33333
MEL-IPI_Pat14-Tumor-SM-53U3C	Miao et la. (PMID 30150660)	Melanoma	Wild	Anti-CTLA-4	47	Female	5.36	1	2.76	1	PD	1.7
MEL-IPI_Pat121-Tumor-SM-7459K	Miao et la. (PMID 30150660)	Melanoma	Wild	Anti-CTLA-4	47	Male	4.01	1	2.76	1	PD	3.7
MEL-IPI_Pat80-Tumor-SM-4DK36	Miao et la. (PMID 30150660)	Melanoma	Wild	Anti-CTLA-4	47	Male	23.82	1	5.99	1	SD	7.4
MEL-IPI_Pat170-Tumor-SM-5VOAZ	Miao et la. (PMID 30150660)	Melanoma	Wild	Anti-CTLA-4	48	Male	3.55	1	3.19	1	PD	7.46667
MEL-IPI_Pat123-Tumor-SM-5X2R1	Miao et la. (PMID 30150660)	Melanoma	Wild	Anti-CTLA-4	49	Female	28.06	1	17.89	1	SD	17.7
WA7899	Miao et la. (PMID 30150660)	Non-small cell lung cancer	Wild	Anti-PD-1/PD-L1	49	Male	1.88	0	1.88	1	PD	4.06667
MEL-IPI_Pat167-Tumor-SM-7A15H	Miao et la. (PMID 30150660)	Melanoma	Wild	Anti-CTLA-4	50	Male	13.42	1	2.76	1	PD	2.03333
SU2C_Lung-SU2C-DFCI-LUAD-1002-Tumor-SM-AOL41	Miao et la. (PMID 30150660)	Non-small cell lung cancer	Wild	Anti-PD-1/PD-L1	50	Female	15.95	0	1.91	1	PD	1.8
DM123062	Miao et la. (PMID 30150660)	Non-small cell lung cancer	Wild	Anti-PD-1/PD-L1	50	Male	1.88	0	1.88	1	PD	3.53333
SR070761	Miao et la. (PMID 30150660)	Non-small cell lung cancer	Wild	Anti-PD-1/PD-L1	51	Female	3.39	0	3.39	1	PD	3.6
MEL-IPI_Pat159-Tumor-SM-5VWK2	Miao et la. (PMID 30150660)	Melanoma	Wild	Anti-CTLA-4	52	Male	27.7	0	3.29	0	PD	19.3333
SU2C_Lung-SU2C-DFCI-LUAD-1018-Tumor-SM-AOL9H	Miao et la. (PMID 30150660)	Non-small cell lung cancer	Wild	Anti-PD-1/PD-L1	52	Female	3.16	1	1.15	1	PD	2.96667
MEL-IPI_Pat86-Tumor-SM-4DK3C	Miao et la. (PMID 30150660)	Melanoma	Wild	Anti-CTLA-4	54	Male	9.64	1	5.03	1	SD	2.66667
MEL-IPI_Pat81-Tumor-SM-4DK37	Miao et la. (PMID 30150660)	Melanoma	Wild	Anti-CTLA-4	54	Female	20.66	1	2.5	1	PD	3.6
MEL-IPI_Pat163-Tumor-SM-5VWK6	Miao et la. (PMID 30150660)	Melanoma	XMut	Anti-CTLA-4	54	Male	24.64	0	2.5	0	PD	3.8
MEL-IPI_Pat82-Tumor-SM-4DK38	Miao et la. (PMID 30150660)	Melanoma	Wild	Anti-CTLA-4	54	Female	3.42	1	2.47	1	PD	14.5667
SU2C_Lung-SU2C-DFCI-LUAD-1017-Tumor-SM-AOL99	Miao et la. (PMID 30150660)	Non-small cell lung cancer	Wild	Anti-PD-1/PD-L1	54	Female	14.24	0	14.24	0	PR	39.5333
MEL-IPI_Pat18-Tumor-SM-4DK1E	Miao et la. (PMID 30150660)	Melanoma	Wild	Anti-CTLA-4	55	Female	37.3	0	3.68	1	PD	1.3
MEL-IPI_Pat162-Tumor-SM-7A15D	Miao et la. (PMID 30150660)	Melanoma	Wild	Anti-CTLA-4	55	Female	6.94	1	2.57	1	PD	2.6
BLCA-IM04-Tumor-SM-79XDB	Miao et la. (PMID 30150660)	Urothelial cancer	XMut	Anti-PD-1/PD-L1	55	Female	6.41	1	5.59	1	SD	2.96667
BLCA-IM07-Tumor-SM-79XDD	Miao et la. (PMID 30150660)	Urothelial cancer	Wild	Anti-PD-1/PD-L1	55	Male	16.32	0	16.32	1	PR	9.23333
LO5004	Miao et la. (PMID 30150660)	Non-small cell lung cancer	Wild	Anti-PD-1/PD-L1	56	Female	6.28	0	6.28	1	SD	1.5
MA7027	Miao et la. (PMID 30150660)	Non-small cell lung cancer	Wild	Anti-PD-1/PD-L1	56	Male	1.78	0	1.78	1	PD	7.86667
MEL-IPI_Pat98-Tumor-SM-4CU6L	Miao et la. (PMID 30150660)	Melanoma	Wild	Anti-CTLA-4	57	Female	4.61	1	2.53	1	PD	2.33333
MEL-IPI_Pat174-Tumor-SM-5VOB4	Miao et la. (PMID 30150660)	Melanoma	Wild	Anti-CTLA-4	57	Female	22.63	0	4.41	0	PR	22.1
CA9903	Miao et la. (PMID 30150660)	Non-small cell lung cancer	Wild	Anti-PD-1/PD-L1	57	Male	14.51	0	14.51	1	PR	10.9
CU9061	Miao et la. (PMID 30150660)	Non-small cell lung cancer	Wild	Anti-PD-1/PD-L1	57	Male	3.98	0	3.98	0	SD	11.4667
Lung-DFCI-11-104-009-Tumor-SM-5YS7O	Miao et la. (PMID 30150660)	Non-small cell lung cancer	XMut	Anti-PD-1/PD-L1	57	Male	21.71	0	21.71	0	CR	47.7667
BLADDER-15330_CCPM_0700691-Tumor-SM-AVI13	Miao et la. (PMID 30150660)	Urothelial cancer	Wild	Anti-PD-1/PD-L1	57	Male	5.72	1	4.05	1	SD	5.53333
MEL-IPI_Pat139-Tumor-SM-5VWJH	Miao et la. (PMID 30150660)	Melanoma	Wild	Anti-CTLA-4	58	Male	3.26	1	1.51	1	PD	46.4667
BLCA-IM06-Tumor-SM-79XDL	Miao et la. (PMID 30150660)	Urothelial cancer	Wild	Anti-PD-1/PD-L1	58	Female	24.01	0	1.91	1	PD	3.46667
MEL-IPI_Pat90-Tumor-SM-4DK3G	Miao et la. (PMID 30150660)	Melanoma	Wild	Anti-CTLA-4	59	Male	33.06	0	22.01	0	PR	7.5
MEL-IPI_Pat58-Tumor-SM-4DK2J	Miao et la. (PMID 30150660)	Melanoma	Wild	Anti-CTLA-4	59	Female	21.45	1	3.26	1	PD	91.0667
GR4788	Miao et la. (PMID 30150660)	Non-small cell lung cancer	Wild	Anti-PD-1/PD-L1	59	Male	1.88	0	1.88	1	PD	3.16667
AL4602	Miao et la. (PMID 30150660)	Non-small cell lung cancer	Wild	Anti-PD-1/PD-L1	59	Male	8.39	0	8.39	0	SD	5.3
SC6470	Miao et la. (PMID 30150660)	Non-small cell lung cancer	Wild	Anti-PD-1/PD-L1	59	Male	8.29	0	8.29	1	SD	7.13333
JB112852	Miao et la. (PMID 30150660)	Non-small cell lung cancer	Wild	Anti-PD-1/PD-L1	60	Male	3.29	0	3.29	1	PD	3.16667
RI1933	Miao et la. (PMID 30150660)	Non-small cell lung cancer	Wild	Anti-PD-1/PD-L1	60	Female	16.58	0	16.58	0	PR	16.3333
BLADDER-15330_CCPM_0700694-Tumor-SM-AVI16	Miao et la. (PMID 30150660)	Urothelial cancer	XMut	Anti-PD-1/PD-L1	60	Male	9.44	0	4.8	1	PR	16.0667
MEL-IPI_Pat27-Tumor-SM-4DK1N	Miao et la. (PMID 30150660)	Melanoma	Wild	Anti-CTLA-4	61	Male	45.36	0	4.57	1	PD	1.56667
MEL-IPI_Pat119-Tumor-SM-7459N	Miao et la. (PMID 30150660)	Melanoma	Wild	Anti-CTLA-4	61	Male	26.58	0	3.55	0	PD	10.1
MEL-IPI_Pat03-Tumor-SM-4DJZY	Miao et la. (PMID 30150660)	Melanoma	Wild	Anti-CTLA-4	61	Female	3.29	1	2.5	1	PD	14.9
SU2C_Lung-SU2C-DFCI-LUAD-1013-Tumor-SM-AOL7V	Miao et la. (PMID 30150660)	Non-small cell lung cancer	Wild	Anti-PD-1/PD-L1	61	Male	1.05	1	1.05	1	PD	3.66667
SU2C_Lung-SU2C-DFCI-LUAD-1004-Tumor-SM-AOL4P	Miao et la. (PMID 30150660)	Non-small cell lung cancer	Wild	Anti-PD-1/PD-L1	61	Male	11.94	1	3.65	1	SD	3.83333
DI6359	Miao et la. (PMID 30150660)	Non-small cell lung cancer	Wild	Anti-PD-1/PD-L1	61	Female	9.8	0	9.8	0	PR	8.53333
MEL-IPI_Pat140-Tumor-SM-5VWJI	Miao et la. (PMID 30150660)	Melanoma	Wild	Anti-CTLA-4	62	Male	16.18	1	3.75	1	PD	11.0667
LO3793	Miao et la. (PMID 30150660)	Non-small cell lung cancer	Wild	Anti-PD-1/PD-L1	62	Female	3.49	0	3.49	1	SD	2.7
MEL-IPI_Pat147-Tumor-SM-7A158	Miao et la. (PMID 30150660)	Melanoma	Wild	Anti-CTLA-4	63	Male	7.37	1	3.95	1	PD	19.4667
R7495	Miao et la. (PMID 30150660)	Non-small cell lung cancer	Wild	Anti-PD-1/PD-L1	63	Male	1.38	0	1.38	1	PD	2.53333
HE3202	Miao et la. (PMID 30150660)	Non-small cell lung cancer	Wild	Anti-PD-1/PD-L1	63	Female	14.7	0	14.7	0	PR	22.7333
SA9755	Miao et la. (PMID 30150660)	Non-small cell lung cancer	XMut	Anti-PD-1/PD-L1	63	Female	8.39	0	8.39	0	PR	40.9333
MEL-IPI_Pat41-Tumor-SM-4DK22	Miao et la. (PMID 30150660)	Melanoma	Wild	Anti-CTLA-4	64	Male	4.21	1	1.78	1	PD	11.9333
MEL-IPI_Pat71-Tumor-SM-4DK2W	Miao et la. (PMID 30150660)	Melanoma	Wild	Anti-CTLA-4	64	Male	4.51	1	3.22	1	PD	27.4333
AU5884	Miao et la. (PMID 30150660)	Non-small cell lung cancer	Wild	Anti-PD-1/PD-L1	64	Male	1.78	0	1.78	1	PD	3.23333
KA3947	Miao et la. (PMID 30150660)	Non-small cell lung cancer	Wild	Anti-PD-1/PD-L1	64	Female	8.09	0	8.09	1	SD	10.4
SC0899	Miao et la. (PMID 30150660)	Non-small cell lung cancer	Wild	Anti-PD-1/PD-L1	64	Female	12.6	0	12.6	0	PR	13.1
MEL-IPI_Pat144-Tumor-SM-7A157	Miao et la. (PMID 30150660)	Melanoma	Wild	Anti-CTLA-4	65	Male	28.62	1	24.05	1	PR	9.1
MEL-IPI_Pat52-Tumor-SM-4DK2D	Miao et la. (PMID 30150660)	Melanoma	Wild	Anti-CTLA-4	65	Male	6.22	1	2.24	1	PD	13.1
SU2C_Lung-SU2C-DFCI-LUAD-1010-Tumor-SM-AOL6S	Miao et la. (PMID 30150660)	Non-small cell lung cancer	Wild	Anti-PD-1/PD-L1	65	Male	9.93	1	3.91	1	SD	5.73333
FR9547	Miao et la. (PMID 30150660)	Non-small cell lung cancer	Wild	Anti-PD-1/PD-L1	65	Female	4.18	0	4.18	0	PR	8.93333
MEL-IPI_Pat171-Tumor-SM-7A15J	Miao et la. (PMID 30150660)	Melanoma	Wild	Anti-CTLA-4	66	Male	15.33	1	2.8	1	PD	2.96667
MEL-IPI_Pat175-Tumor-SM-7A15L	Miao et la. (PMID 30150660)	Melanoma	Wild	Anti-CTLA-4	66	Female	2.96	1	2.96	1	NA	3.66667
M4945	Miao et la. (PMID 30150660)	Non-small cell lung cancer	Wild	Anti-PD-1/PD-L1	66	Male	14.61	0	14.61	0	PR	9.43333
MEL-IPI_Pat39-Tumor-SM-4DK1Z	Miao et la. (PMID 30150660)	Melanoma	Wild	Anti-CTLA-4	67	Male	48.91	0	48.91	0	CR	2.6
MEL-IPI_Pat11-Tumor-SM-4DK17	Miao et la. (PMID 30150660)	Melanoma	Wild	Anti-CTLA-4	67	Male	25.99	0	4.14	1	PD	66.3
BLCA-IM01-Tumor-SM-79XD9	Miao et la. (PMID 30150660)	Urothelial cancer	Wild	Anti-PD-1/PD-L1	67	Male	7.01	1	2.8	1	PD	4.53333
MEL-IPI_Pat56-Tumor-SM-4DK2H	Miao et la. (PMID 30150660)	Melanoma	Wild	Anti-CTLA-4	68	Male	7.73	1	3.16	1	PD	1.83333
MEL-IPI_Pat113-Tumor-SM-53U2Q	Miao et la. (PMID 30150660)	Melanoma	Wild	Anti-CTLA-4	68	Male	9.9	1	1.71	1	PR	10.2
MEL-IPI_Pat16-Tumor-SM-53U3E	Miao et la. (PMID 30150660)	Melanoma	Wild	Anti-CTLA-4	68	Female	26.68	1	2.76	1	PD	63
MEL-IPI_Pat151-Tumor-SM-7A15A	Miao et la. (PMID 30150660)	Melanoma	XMut	Anti-CTLA-4	68	Male	6.71	1	3.49	1	PD	86.2333
Y2087	Miao et la. (PMID 30150660)	Non-small cell lung cancer	Wild	Anti-PD-1/PD-L1	68	Female	8.29	0	8.29	1	SD	3.56667
SB010944	Miao et la. (PMID 30150660)	Non-small cell lung cancer	Wild	Anti-PD-1/PD-L1	68	Male	27.3	0	27.3	0	PR	8.66667
BLADDER-15330_CCPM_0700692-Tumor-SM-AVI11	Miao et la. (PMID 30150660)	Urothelial cancer	Wild	Anti-PD-1/PD-L1	68	Male	8.95	1	3.91	1	SD	9.8
BLCA-IM11-Tumor-SM-79XDH	Miao et la. (PMID 30150660)	Urothelial cancer	Wild	Anti-PD-1/PD-L1	68	Male	13.52	1	5.59	1	PR	10.9
MEL-IPI_Pat57-Tumor-SM-4DK2I	Miao et la. (PMID 30150660)	Melanoma	Wild	Anti-CTLA-4	69	Male	8.22	1	2.24	1	PD	2.16667
MEL-IPI_Pat157-Tumor-SM-7A15B	Miao et la. (PMID 30150660)	Melanoma	Wild	Anti-CTLA-4	69	Female	2.83	1	1.74	1	NA	4.56667
MEL-IPI_Pat168-Tumor-SM-5VOAX	Miao et la. (PMID 30150660)	Melanoma	XMut	Anti-CTLA-4	69	Male	2.2	1	2.2	1	NA	8.96667
MEL-IPI_Pat79-Tumor-SM-53U2S	Miao et la. (PMID 30150660)	Melanoma	Wild	Anti-CTLA-4	69	Male	26.35	1	13.32	1	PR	10.2667
MEL-IPI_Pat45-Tumor-SM-4DK26	Miao et la. (PMID 30150660)	Melanoma	Wild	Anti-CTLA-4	69	Male	2.93	1	2.01	1	PD	30.7333
BLADDER-15330_CCPM_0700629-Tumor-SM-AVI1C	Miao et la. (PMID 30150660)	Urothelial cancer	Wild	Anti-PD-1/PD-L1	69	Male	3.49	0	1.78	0	PR	10.7333
MEL-IPI_Pat103-Tumor-SM-4CU6Q	Miao et la. (PMID 30150660)	Melanoma	XMut	Anti-CTLA-4	70	Male	34.47	1	31.88	1	PR	25.3
MEL-IPI_Pat73-Tumor-SM-4DK2Y	Miao et la. (PMID 30150660)	Melanoma	Wild	Anti-CTLA-4	71	Male	14.54	1	13.42	1	PR	7.73333
MEL-IPI_Pat04-Tumor-SM-4DJZZ	Miao et la. (PMID 30150660)	Melanoma	Wild	Anti-CTLA-4	71	Male	32.47	0	21.25	0	PR	13.8333
MEL-IPI_Pat55-Tumor-SM-4DK2G	Miao et la. (PMID 30150660)	Melanoma	Wild	Anti-CTLA-4	71	Female	6.35	1	2.57	1	PD	17.3
MEL-IPI_Pat100-Tumor-SM-53U2D	Miao et la. (PMID 30150660)	Melanoma	Wild	Anti-CTLA-4	71	Male	11.84	1	3.65	1	PD	18.4
MEL-IPI_Pat143-Tumor-SM-7A156	Miao et la. (PMID 30150660)	Melanoma	Wild	Anti-CTLA-4	71	Male	5.03	1	2.96	1	PD	31.5667
RO3338	Miao et la. (PMID 30150660)	Non-small cell lung cancer	Wild	Anti-PD-1/PD-L1	71	Male	2.07	0	2.07	1	PD	2.4
SU2C_Lung-SU2C-DFCI-LUAD-1005-Tumor-SM-AOL52	Miao et la. (PMID 30150660)	Non-small cell lung cancer	Wild	Anti-PD-1/PD-L1	72	Female	11.15	1	1.12	1	PD	3.06667
SU2C_Lung-SU2C-DFCI-LUAD-1016-Tumor-SM-AOL8W	Miao et la. (PMID 30150660)	Non-small cell lung cancer	Wild	Anti-PD-1/PD-L1	72	Female	14.77	0	7.57	1	SD	6.23333
BLCA-IM10-Tumor-SM-79XDG	Miao et la. (PMID 30150660)	Urothelial cancer	Wild	Anti-PD-1/PD-L1	72	Male	15.39	1	11.71	1	CR	12.5
MEL-IPI_Pat08-Tumor-SM-4DK14	Miao et la. (PMID 30150660)	Melanoma	Wild	Anti-CTLA-4	73	Male	4.61	1	2.4	1	PD	8.7
MEL-IPI_Pat134-Tumor-SM-5VWJC	Miao et la. (PMID 30150660)	Melanoma	Wild	Anti-CTLA-4	73	Male	9.93	1	2.37	1	PD	13.1667
MEL-IPI_Pat74-Tumor-SM-4DK2Z	Miao et la. (PMID 30150660)	Melanoma	Wild	Anti-CTLA-4	73	Male	6.35	1	2.63	1	PD	17.7
MEL-IPI_Pat32-Tumor-SM-53U3T	Miao et la. (PMID 30150660)	Melanoma	Wild	Anti-CTLA-4	73	Male	4.84	1	2.3	1	PD	24.0333
MEL-IPI_Pat54-Tumor-SM-4DK2F	Miao et la. (PMID 30150660)	Melanoma	Wild	Anti-CTLA-4	73	Male	6.84	1	2.66	1	PD	29.6
BL3403	Miao et la. (PMID 30150660)	Non-small cell lung cancer	Wild	Anti-PD-1/PD-L1	73	Female	6.48	0	6.48	1	SD	2.66667
MEL-IPI_Pat24-Tumor-SM-4DK1K	Miao et la. (PMID 30150660)	Melanoma	Wild	Anti-CTLA-4	74	Female	31.94	0	21.64	0	PR	1.26667
MEL-IPI_Pat76-Tumor-SM-4DK32	Miao et la. (PMID 30150660)	Melanoma	Wild	Anti-CTLA-4	74	Male	4.57	1	2.3	1	PD	7.06667
MEL-IPI_Pat117-Tumor-SM-5X2QU	Miao et la. (PMID 30150660)	Melanoma	Wild	Anti-CTLA-4	74	Male	30.07	0	5.99	0	PR	23.6333
SU2C_Lung-SU2C-DFCI-LUAD-1006-Tumor-SM-AOL5E	Miao et la. (PMID 30150660)	Non-small cell lung cancer	Wild	Anti-PD-1/PD-L1	74	Female	5.99	0	5.99	1	PD	3.56667
BLCA-IM09-Tumor-SM-79XDF	Miao et la. (PMID 30150660)	Urothelial cancer	Wild	Anti-PD-1/PD-L1	74	Female	21.81	1	14.51	1	PR	9.86667
MEL-IPI_Pat101-Tumor-SM-4CU6O	Miao et la. (PMID 30150660)	Melanoma	Wild	Anti-CTLA-4	75	Male	9.47	1	2.53	1	PD	2.46667
MEL-IPI_Pat43-Tumor-SM-4DK24	Miao et la. (PMID 30150660)	Melanoma	Wild	Anti-CTLA-4	75	Female	1.22	1	1.22	1	PD	7.36667
MEL-IPI_Pat133-Tumor-SM-7A14Z	Miao et la. (PMID 30150660)	Melanoma	Wild	Anti-CTLA-4	75	Male	17.83	1	4.41	1	PD	9.1
MEL-IPI_Pat62-Tumor-SM-4DK2N	Miao et la. (PMID 30150660)	Melanoma	Wild	Anti-CTLA-4	76	Male	19.8	1	2.53	1	PD	56.7333
MEL-IPI_Pat110-Tumor-SM-4CU6X	Miao et la. (PMID 30150660)	Melanoma	XMut	Anti-CTLA-4	76	Male	10.53	1	2.4	1	PD	216.733
SU2C_Lung-SU2C-DFCI-LUAD-1011-Tumor-SM-AOL75	Miao et la. (PMID 30150660)	Non-small cell lung cancer	Wild	Anti-PD-1/PD-L1	76	Male	5.82	1	1.84	1	PD	4.73333
MEL-IPI_Pat126-Tumor-SM-5X2R4	Miao et la. (PMID 30150660)	Melanoma	Wild	Anti-CTLA-4	77	Male	21.09	0	6.15	0	PR	14.2
MEL-IPI_Pat50-Tumor-SM-53U69	Miao et la. (PMID 30150660)	Melanoma	Wild	Anti-CTLA-4	77	Male	2.14	1	2.14	1	PD	14.8
SU2C_Lung-SU2C-DFCI-LUAD-1003-Tumor-SM-AOL4D	Miao et la. (PMID 30150660)	Non-small cell lung cancer	Wild	Anti-PD-1/PD-L1	77	Female	4.34	1	1.84	1	PD	4.1
MEL-IPI_Pat61-Tumor-SM-4DK2M	Miao et la. (PMID 30150660)	Melanoma	Wild	Anti-CTLA-4	78	Female	3.98	1	2.66	1	PD	0.433333
MEL-IPI_Pat13-Tumor-SM-4DK19	Miao et la. (PMID 30150660)	Melanoma	Wild	Anti-CTLA-4	78	Male	24.08	1	3.42	1	PD	4.3
MEL-IPI_Pat47-Tumor-SM-4DK28	Miao et la. (PMID 30150660)	Melanoma	Wild	Anti-CTLA-4	78	Male	36.38	0	36.38	0	CR	5.1
MEL-IPI_Pat124-Tumor-SM-7459L	Miao et la. (PMID 30150660)	Melanoma	Wild	Anti-CTLA-4	78	Male	4.8	1	2.2	1	PD	13.3667
RH090935	Miao et la. (PMID 30150660)	Non-small cell lung cancer	Wild	Anti-PD-1/PD-L1	78	Female	10.39	0	10.39	0	PR	4.06667
MEL-IPI_Pat160-Tumor-SM-5VWK3	Miao et la. (PMID 30150660)	Melanoma	Wild	Anti-CTLA-4	79	Male	5	1	2.66	1	PD	1.8
BLCA-IM12-Tumor-SM-9RN2L	Miao et la. (PMID 30150660)	Urothelial cancer	Wild	Anti-PD-1/PD-L1	79	Male	4.7	1	2.8	1	PD	5.5
MEL-IPI_Pat21-Tumor-SM-4DK1H	Miao et la. (PMID 30150660)	Melanoma	XMut	Anti-CTLA-4	81	Male	22.24	1	18.36	1	SD	47.6667
MEL-IPI_Pat132-Tumor-SM-5VWJA	Miao et la. (PMID 30150660)	Melanoma	Wild	Anti-CTLA-4	81	Male	22.24	0	6.15	0	PR	76.5
MEL-IPI_Pat85-Tumor-SM-53U2Y	Miao et la. (PMID 30150660)	Melanoma	Wild	Anti-CTLA-4	83	Male	15.07	1	2.73	1	PD	17.7
MEL-IPI_Pat64-Tumor-SM-4DK2P	Miao et la. (PMID 30150660)	Melanoma	Wild	Anti-CTLA-4	83	Male	3.49	1	2.27	1	PD	22.4
MEL-IPI_Pat111-Tumor-SM-4CU6Y	Miao et la. (PMID 30150660)	Melanoma	Wild	Anti-CTLA-4	84	Male	20.33	1	15.36	1	PD	46.2
MEL-IPI_Pat60-Tumor-SM-4DK2L	Miao et la. (PMID 30150660)	Melanoma	Wild	Anti-CTLA-4	86	Male	8.95	1	2.93	1	PD	25.9333
HNSCC-266-Tumor-SM-CK9YG	Miao et la. (PMID 30150660)	Head and neck cancer	Wild	Anti-PD-1/PD-L1	NA	Female	1.97	1	1.28	1	PD	1.23333
HNSCC-238-Tumor-SM-AXGF5	Miao et la. (PMID 30150660)	Head and neck cancer	Wild	Anti-PD-1/PD-L1	NA	Male	15.13	0	10.36	1	PR	1.33333
HNSCC-239-Tumor-SM-AXGCS	Miao et la. (PMID 30150660)	Head and neck cancer	Wild	Anti-PD-1/PD-L1	NA	Male	13.22	1	4.54	1	SD	1.73333
HNSCC-243-Tumor-SM-CLFNS	Miao et la. (PMID 30150660)	Head and neck cancer	Wild	Anti-PD-1/PD-L1+CTLA-4	NA	Male	3.72	0	1.81	1	PD	1.83333
HNSCC-186-Tumor-SM-AXGDN	Miao et la. (PMID 30150660)	Head and neck cancer	Wild	Anti-PD-1/PD-L1	NA	Male	20.39	1	19.61	1	SD	2.03333
HNSCC-306-Tumor-SM-CK9Y6	Miao et la. (PMID 30150660)	Head and neck cancer	Wild	Anti-PD-1/PD-L1+CTLA-4	NA	Male	5.56	0	2.76	1	PD	2.2
HNSCC-215-Tumor-SM-CK9VX	Miao et la. (PMID 30150660)	Head and neck cancer	Wild	Anti-PD-1/PD-L1	NA	Male	8.75	1	2.14	1	PD	3.26667
HNSCC-305-Tumor-SM-CK9XQ	Miao et la. (PMID 30150660)	Head and neck cancer	Wild	Anti-PD-1/PD-L1+CTLA-4	NA	Male	4.9	0	2.8	1	SD	4.06667
HNSCC-323-Tumor-SM-CK9WS	Miao et la. (PMID 30150660)	Head and neck cancer	Wild	Anti-PD-1/PD-L1	NA	Male	4.61	0	4.61	0	PR	7.46667
HNSCC-287-Tumor-SM-AXGEI	Miao et la. (PMID 30150660)	Head and neck cancer	Wild	Anti-PD-1/PD-L1+CTLA-4	NA	Male	2.34	1	1.84	1	PD	11.4
HNSCC-258-Tumor-SM-AXGAI	Miao et la. (PMID 30150660)	Head and neck cancer	Wild	Anti-PD-1/PD-L1	NA	Male	12.43	0	12.43	0	SD	12.5
HNSCC-296-Tumor-SM-CLFOB	Miao et la. (PMID 30150660)	Head and neck cancer	Wild	Anti-PD-1/PD-L1	NA	Male	1.51	1	1.41	1	SD	14.1667
NR9705_T	Miao et la. (PMID 30150660)	Melanoma	Wild	Anti-CTLA-4	NA	Female	14.41	0	6.68	0	PD	0.9
SD2051_T	Miao et la. (PMID 30150660)	Melanoma	Wild	Anti-CTLA-4	NA	Female	9.61	1	3.68	0	SD	1.13333
MEL-582186-Tumor-SM-CN21Q	Miao et la. (PMID 30150660)	Melanoma	Wild	Anti-PD-1/PD-L1+CTLA-4	NA	Female	13.65	0	10.63	1	PR	1.93333
DFCI_MM_1-Tumor-SM-BZRJ8	Miao et la. (PMID 30150660)	Melanoma	Wild	Anti-PD-1/PD-L1	NA	Female	19.74	0	18.03	1	CR	2.16667
SD5118_T	Miao et la. (PMID 30150660)	Melanoma	Wild	Anti-CTLA-4	NA	Female	32.42	1	5.53	0	SD	2.43333
NR9765_T	Miao et la. (PMID 30150660)	Melanoma	Wild	Anti-CTLA-4	NA	Female	25.21	0	5.07	0	PD	2.73333
NR1867_T	Miao et la. (PMID 30150660)	Melanoma	Wild	Anti-CTLA-4	NA	Male	18.01	0	5.3	0	PD	2.93333
PR4046_T	Miao et la. (PMID 30150660)	Melanoma	Wild	Anti-CTLA-4	NA	Male	25.33	0	25.33	0	PR	4.46667
NR4018_T	Miao et la. (PMID 30150660)	Melanoma	Wild	Anti-CTLA-4	NA	Male	3.6	0	2.53	0	PD	4.76667
SD2056_T	Miao et la. (PMID 30150660)	Melanoma	Wild	Anti-CTLA-4	NA	Female	47.89	0	47.89	0	SD	5
CR3665_T	Miao et la. (PMID 30150660)	Melanoma	Wild	Anti-CTLA-4	NA	Male	32.42	0	11.05	NA	CR	5.16667
SD5934_T	Miao et la. (PMID 30150660)	Melanoma	Wild	Anti-CTLA-4	NA	Male	19.21	1	3.22	0	SD	5.56667
LSD2057_T	Miao et la. (PMID 30150660)	Melanoma	Wild	Anti-CTLA-4	NA	Female	39.62	0	14.74	NA	SD	5.86667
MEL-587761-Tumor-SM-CN1ZV	Miao et la. (PMID 30150660)	Melanoma	Wild	Anti-PD-1/PD-L1+CTLA-4	NA	Male	19.21	0	6.12	1	SD	6.26667
LSD6819_T	Miao et la. (PMID 30150660)	Melanoma	Wild	Anti-CTLA-4	NA	Male	40.82	0	15.43	NA	SD	7.1
MEL-650366-Tumor-SM-CN221	Miao et la. (PMID 30150660)	Melanoma	Wild	Anti-PD-1/PD-L1+CTLA-4	NA	Female	26.12	0	1.38	1	PD	7.33333
NR9445_T	Miao et la. (PMID 30150660)	Melanoma	Wild	Anti-CTLA-4	NA	Male	2.4	0	1.84	0	PD	8.66667
CR0095_T	Miao et la. (PMID 30150660)	Melanoma	Wild	Anti-CTLA-4	NA	Male	68.44	0	14.97	NA	CR	9.06667
PR4091_T	Miao et la. (PMID 30150660)	Melanoma	Wild	Anti-CTLA-4	NA	Female	72.3	0	72.3	0	PR	9.06667
SD5038_T	Miao et la. (PMID 30150660)	Melanoma	Wild	Anti-CTLA-4	NA	Male	14.41	1	5.53	0	SD	9.33333
NR9449_T	Miao et la. (PMID 30150660)	Melanoma	XMut	Anti-CTLA-4	NA	Female	7.2	0	2.3	0	PD	9.7
NR4083_T	Miao et la. (PMID 30150660)	Melanoma	Wild	Anti-CTLA-4	NA	Male	2.76	0	2.76	0	PD	11.0667
SD6336_T	Miao et la. (PMID 30150660)	Melanoma	Wild	Anti-CTLA-4	NA	Male	83.13	0	83.13	0	SD	11.4333
CR22640_T	Miao et la. (PMID 30150660)	Melanoma	Wild	Anti-CTLA-4	NA	Male	51.63	0	49.74	NA	CR	11.5
NR4810_T	Miao et la. (PMID 30150660)	Melanoma	Wild	Anti-CTLA-4	NA	Female	4.8	0	2.76	0	PD	12.6
NR3549_T	Miao et la. (PMID 30150660)	Melanoma	Wild	Anti-CTLA-4	NA	Male	6	0	3.68	0	PD	13.4333
LSD0167_T	Miao et la. (PMID 30150660)	Melanoma	Wild	Anti-CTLA-4	NA	Male	32.42	0	32.24	NA	SD	14.0333
NR4045_T	Miao et la. (PMID 30150660)	Melanoma	Wild	Anti-CTLA-4	NA	Male	20.41	0	2.53	0	PD	14.6333
PR4035_T	Miao et la. (PMID 30150660)	Melanoma	Wild	Anti-CTLA-4	NA	Male	50.43	0	50.2	0	PR	17.5667
LSD3484_T	Miao et la. (PMID 30150660)	Melanoma	Wild	Anti-CTLA-4	NA	Male	35.46	0	35.46	NA	SD	17.7
SD0346_T	Miao et la. (PMID 30150660)	Melanoma	XMut	Anti-CTLA-4	NA	Female	34.82	1	15.66	0	SD	18.8333
CR1509_T	Miao et la. (PMID 30150660)	Melanoma	Wild	Anti-CTLA-4	NA	Female	54.03	0	16.58	NA	CR	19.1
CR6126_T	Miao et la. (PMID 30150660)	Melanoma	Wild	Anti-CTLA-4	NA	Female	23.26	0	23.26	NA	CR	19.1
NR4949_T	Miao et la. (PMID 30150660)	Melanoma	Wild	Anti-CTLA-4	NA	Female	8.4	0	5.3	0	PD	19.8
SD6494_T	Miao et la. (PMID 30150660)	Melanoma	Wild	Anti-CTLA-4	NA	Female	8.4	1	2.99	0	SD	20.8333
CR06670_T	Miao et la. (PMID 30150660)	Melanoma	Wild	Anti-CTLA-4	NA	Female	44.42	1	38.68	NA	CR	21.0667
NR2137_T	Miao et la. (PMID 30150660)	Melanoma	Wild	Anti-CTLA-4	NA	Male	9.61	0	1.84	0	PD	21.2667
CR6161_T	Miao et la. (PMID 30150660)	Melanoma	Wild	Anti-CTLA-4	NA	Male	31.32	1	31.32	NA	CR	27.9333
SD1494_T	Miao et la. (PMID 30150660)	Melanoma	Wild	Anti-CTLA-4	NA	Male	24.01	0	11.74	0	SD	30.8
MEL-682321-Tumor-SM-CN21G	Miao et la. (PMID 30150660)	Melanoma	XMut	Anti-PD-1/PD-L1+CTLA-4	NA	Female	14.7	0	14.7	0	PR	33.3667
NR9521_T	Miao et la. (PMID 30150660)	Melanoma	XMut	Anti-CTLA-4	NA	Male	32.42	0	2.76	0	PD	36.1
PR12117_T	Miao et la. (PMID 30150660)	Melanoma	Wild	Anti-CTLA-4	NA	Male	19.21	1	16.81	0	PR	37.4
LSD4744_T	Miao et la. (PMID 30150660)	Melanoma	Wild	Anti-CTLA-4	NA	Male	25.21	0	18.42	NA	SD	37.6667
DFCI_MM_2-Tumor-SM-BZRJA	Miao et la. (PMID 30150660)	Melanoma	XMut	Anti-PD-1/PD-L1	NA	Female	12.01	0	12.01	1	CR	38.3667
NR4631_T	Miao et la. (PMID 30150660)	Melanoma	Wild	Anti-CTLA-4	NA	Male	6	0	2.99	0	PD	38.6333
SD7357_T	Miao et la. (PMID 30150660)	Melanoma	XMut	Anti-CTLA-4	NA	Female	24.01	1	4.84	0	SD	40.5667
CR9699_T	Miao et la. (PMID 30150660)	Melanoma	Wild	Anti-CTLA-4	NA	Male	52.83	0	11.97	NA	CR	43.1333
CR9306_T	Miao et la. (PMID 30150660)	Melanoma	XMut	Anti-CTLA-4	NA	Male	63.63	0	9.67	NA	CR	47.6
NR8815_T	Miao et la. (PMID 30150660)	Melanoma	Wild	Anti-CTLA-4	NA	Female	14.41	0	2.07	0	PD	56.5667
PR4077_T	Miao et la. (PMID 30150660)	Melanoma	Wild	Anti-CTLA-4	NA	Male	73.24	0	72.76	0	PR	57.2333
CR04885_T	Miao et la. (PMID 30150660)	Melanoma	Wild	Anti-CTLA-4	NA	Female	25.21	0	19.57	NA	CR	66
PR4092_T	Miao et la. (PMID 30150660)	Melanoma	XMut	Anti-CTLA-4	NA	Female	73.24	0	72.53	0	PR	116.3
LUAD-BS-11-F1305-Tumor-SM-9J2XG	Miao et la. (PMID 30150660)	Non-small cell lung cancer	Wild	Anti-PD-1/PD-L1	NA	Female	3.91	1	1.15	1	SD	2.53333
LUAD-BS-12-X27523-Tumor-SM-9J2Y5	Miao et la. (PMID 30150660)	Non-small cell lung cancer	Wild	Anti-PD-1/PD-L1	NA	Female	10.72	1	4.11	1	SD	4.13333
LUAD-BS-13-N35728-Tumor-SM-9J2XI	Miao et la. (PMID 30150660)	Non-small cell lung cancer	Wild	Anti-PD-1/PD-L1	NA	Female	12.63	1	6.38	1	SD	4.2
LUAD-BS-14-N19784-Tumor-SM-9J2XW	Miao et la. (PMID 30150660)	Non-small cell lung cancer	Wild	Anti-PD-1/PD-L1	NA	Male	26.91	1	4.14	1	SD	4.56667
LUAD-BS-08-013532-Tumor-SM-9J2Y1	Miao et la. (PMID 30150660)	Non-small cell lung cancer	Wild	Anti-PD-1/PD-L1	NA	Female	7.99	1	7.99	1	PR	5.1
LUAD-BS-10-R22401-Tumor-SM-9J2XK	Miao et la. (PMID 30150660)	Non-small cell lung cancer	Wild	Anti-PD-1/PD-L1	NA	Male	3.91	1	1.71	1	SD	5.4
LUAD-BS-14-J45174-Tumor-SM-9J2YJ	Miao et la. (PMID 30150660)	Non-small cell lung cancer	Wild	Anti-PD-1/PD-L1	NA	Female	24.9	0	1.32	1	PD	5.7
LUAD-BS-13-F33496-Tumor-SM-9J2XU	Miao et la. (PMID 30150660)	Non-small cell lung cancer	Wild	Anti-PD-1/PD-L1	NA	Female	6.74	1	3.22	1	SD	6.16667
CANSEQU01-0100425-Tumor-SM-6ZL67	Miao et la. (PMID 30150660)	Non-small cell lung cancer	Wild	Anti-PD-1/PD-L1	NA	Female	24.18	0	6.81	1	PR	6.83333
LUAD-BS-11-R21845-Tumor-SM-9J2YH	Miao et la. (PMID 30150660)	Non-small cell lung cancer	Wild	Anti-PD-1/PD-L1	NA	Female	58.59	0	13.75	1	SD	6.9
LUAD-BS-10-J11656-Tumor-SM-9J2Y7	Miao et la. (PMID 30150660)	Non-small cell lung cancer	Wild	Anti-PD-1/PD-L1	NA	Male	4.47	1	4.24	1	SD	7.66667
LUAD-BS-12-R10269-Tumor-SM-9J2XO	Miao et la. (PMID 30150660)	Non-small cell lung cancer	Wild	Anti-PD-1/PD-L1	NA	Female	13.59	1	4.7	1	PR	11.7
LUAD-BS-13-J60666-Tumor-SM-9J2YL	Miao et la. (PMID 30150660)	Non-small cell lung cancer	Wild	Anti-PD-1/PD-L1	NA	Female	32.86	0	32.86	1	PR	13.1667
LUNG-2630-Tumor-SM-CLFOY	Miao et la. (PMID 30150660)	Non-small cell lung cancer	Wild	Anti-PD-1/PD-L1	NA	Male	15.53	1	7.66	1	SD	18.4667
LUAD-BS-13-X14864-Tumor-SM-9J2XQ	Miao et la. (PMID 30150660)	Non-small cell lung cancer	XMut	Anti-PD-1/PD-L1	NA	Male	5.79	1	5.59	1	SD	32.6
BLCA-014-Tumor-SM-CUCGO	Miao et la. (PMID 30150660)	Urothelial cancer	Wild	Anti-PD-1/PD-L1	NA	Female	11.84	0	1.97	1	PD	1.66667
BLCA-007-Tumor-SM-CUCGH	Miao et la. (PMID 30150660)	Urothelial cancer	Wild	Anti-PD-1/PD-L1	NA	Female	13.03	0	13.03	0	CR	2.23333
BLCA-006-Tumor-SM-CUCGF	Miao et la. (PMID 30150660)	Urothelial cancer	Wild	Anti-PD-1/PD-L1+CTLA-4	NA	Male	12.11	1	5.43	1	PR	3.56667
BLCA-001-Tumor-SM-CUCGA	Miao et la. (PMID 30150660)	Urothelial cancer	Wild	Anti-PD-1/PD-L1	NA	Male	3.16	1	1.05	1	PD	4.2
BLCA-003-Tumor-SM-CUCGC	Miao et la. (PMID 30150660)	Urothelial cancer	Wild	Anti-PD-1/PD-L1	NA	Male	2.43	1	0.95	1	PD	4.33333
BLCA-016-Tumor-SM-CUCGQ	Miao et la. (PMID 30150660)	Urothelial cancer	Wild	Anti-PD-1/PD-L1	NA	Female	24.47	0	24.47	0	PR	4.33333
BLCA-008-Tumor-SM-CUCGI	Miao et la. (PMID 30150660)	Urothelial cancer	Wild	Anti-PD-1/PD-L1	NA	Female	3.45	1	3.45	1	PD	5.23333
BLCA-002-Tumor-SM-CUCGB	Miao et la. (PMID 30150660)	Urothelial cancer	Wild	Anti-PD-1/PD-L1	NA	Male	16.71	0	16.71	0	SD	6.1
BLCA-005-Tumor-SM-CUCGE	Miao et la. (PMID 30150660)	Urothelial cancer	Wild	Anti-PD-1/PD-L1	NA	Female	16.55	0	16.55	0	PR	7.26667
BLCA-015-Tumor-SM-CUCGP	Miao et la. (PMID 30150660)	Urothelial cancer	Wild	Anti-PD-1/PD-L1	NA	Male	3.13	1	2.27	1	PD	9.8
BLCA-009-Tumor-SM-CUCGJ	Miao et la. (PMID 30150660)	Urothelial cancer	Wild	Anti-PD-1/PD-L1	NA	Male	4.67	1	4.05	1	PD	10.5
BLCA-011-Tumor-SM-CUCGL	Miao et la. (PMID 30150660)	Urothelial cancer	Wild	Anti-PD-1/PD-L1	NA	Male	5.56	1	2.07	1	PD	11
BLCA-010-Tumor-SM-CUCGK	Miao et la. (PMID 30150660)	Urothelial cancer	Wild	Anti-PD-1/PD-L1	NA	Male	16.12	0	16.12	0	PR	11.6667
DFCI_11-104_011-Tumor-SM-5PA3E	Miao et la. (PMID 30150660)	Urothelial cancer	Wild	Anti-PD-1/PD-L1	NA	Male	44.34	0	19.44	1	CR	16.8667
BLCA-012-Tumor-SM-CUCGM	Miao et la. (PMID 30150660)	Urothelial cancer	Wild	Anti-PD-1/PD-L1	NA	Male	16.58	0	15.76	1	PR	34.8
Pt10	Riaz et al. (PMID 29033130)	Melanoma	Wild	Anti-PD-1/PD-L1	NA	NA	8.53333	1	3.96667	1	SD
Pt100	Riaz et al. (PMID 29033130)	Melanoma	Wild	Anti-PD-1/PD-L1	NA	NA	28	1	1.66667	1	PD
Pt101	Riaz et al. (PMID 29033130)	Melanoma	Wild	Anti-PD-1/PD-L1	NA	NA	27.8	0	20.4	1	PR
Pt102	Riaz et al. (PMID 29033130)	Melanoma	Wild	Anti-PD-1/PD-L1	NA	NA	21.2	0	3.73333	1	SD
Pt103	Riaz et al. (PMID 29033130)	Melanoma	Wild	Anti-PD-1/PD-L1	NA	NA	16.1333	0	1.66667	1	PD
Pt104	Riaz et al. (PMID 29033130)	Melanoma	Wild	Anti-PD-1/PD-L1	NA	NA	27.2667	0	24.7333	0	PR
Pt106	Riaz et al. (PMID 29033130)	Melanoma	Wild	Anti-PD-1/PD-L1	NA	NA	3.03333	1	1.86667	1	PD
Pt108	Riaz et al. (PMID 29033130)	Melanoma	Wild	Anti-PD-1/PD-L1	NA	NA	30.4333	0	18.3	1	SD
Pt11	Riaz et al. (PMID 29033130)	Melanoma	Wild	Anti-PD-1/PD-L1	NA	NA	27.9	1	1.96667	1	PD
Pt13	Riaz et al. (PMID 29033130)	Melanoma	Wild	Anti-PD-1/PD-L1	NA	NA	9.33333	1	2.06667	1	PD
Pt17	Riaz et al. (PMID 29033130)	Melanoma	Wild	Anti-PD-1/PD-L1	NA	NA	1.9	1	1.6	1	PD
Pt18	Riaz et al. (PMID 29033130)	Melanoma	Wild	Anti-PD-1/PD-L1	NA	NA	35.7667	0	17.3	1	PR
Pt23	Riaz et al. (PMID 29033130)	Melanoma	Wild	Anti-PD-1/PD-L1	NA	NA	1.73333	1	1.73333	1	NA
Pt24	Riaz et al. (PMID 29033130)	Melanoma	Wild	Anti-PD-1/PD-L1	NA	NA	4.96667	0	1.66667	1	PD
Pt25	Riaz et al. (PMID 29033130)	Melanoma	Wild	Anti-PD-1/PD-L1	NA	NA	3.36667	1	0.8	1	PD
Pt26	Riaz et al. (PMID 29033130)	Melanoma	Wild	Anti-PD-1/PD-L1	NA	NA	31.7333	0	9.8	1	SD
Pt27	Riaz et al. (PMID 29033130)	Melanoma	Wild	Anti-PD-1/PD-L1	NA	NA	15.8333	1	1.66667	1	PD
Pt28	Riaz et al. (PMID 29033130)	Melanoma	Wild	Anti-PD-1/PD-L1	NA	NA	24.6667	1	2.03333	1	PD
Pt29	Riaz et al. (PMID 29033130)	Melanoma	Wild	Anti-PD-1/PD-L1	NA	NA	9.1	1	1.66667	1	PD
Pt3	Riaz et al. (PMID 29033130)	Melanoma	Wild	Anti-PD-1/PD-L1	NA	NA	38.1333	0	19.4333	1	PR
Pt30	Riaz et al. (PMID 29033130)	Melanoma	Wild	Anti-PD-1/PD-L1	NA	NA	35.1	0	20.1	1	CR
Pt31	Riaz et al. (PMID 29033130)	Melanoma	Wild	Anti-PD-1/PD-L1	NA	NA	32.0333	0	1.66667	1	PD
Pt32	Riaz et al. (PMID 29033130)	Melanoma	Wild	Anti-PD-1/PD-L1	NA	NA	3.8	0	1.9	1	PD
Pt34	Riaz et al. (PMID 29033130)	Melanoma	Wild	Anti-PD-1/PD-L1	NA	NA	27.8	0	27.8	0	PR
Pt36	Riaz et al. (PMID 29033130)	Melanoma	Wild	Anti-PD-1/PD-L1	NA	NA	36.0333	0	24.5667	0	SD
Pt37	Riaz et al. (PMID 29033130)	Melanoma	Wild	Anti-PD-1/PD-L1	NA	NA	21.5333	1	5.86667	1	SD
Pt38	Riaz et al. (PMID 29033130)	Melanoma	Wild	Anti-PD-1/PD-L1	NA	NA	5.56667	1	5.56667	1	SD
Pt4	Riaz et al. (PMID 29033130)	Melanoma	Wild	Anti-PD-1/PD-L1	NA	NA	21.1	1	5.83333	1	SD
Pt44	Riaz et al. (PMID 29033130)	Melanoma	Wild	Anti-PD-1/PD-L1	NA	NA	36.4333	0	18.6667	1	PR
Pt46	Riaz et al. (PMID 29033130)	Melanoma	Wild	Anti-PD-1/PD-L1	NA	NA	7.56667	1	1.7	1	PD
Pt47	Riaz et al. (PMID 29033130)	Melanoma	Wild	Anti-PD-1/PD-L1	NA	NA	23.9333	1	1.9	1	PD
Pt48	Riaz et al. (PMID 29033130)	Melanoma	Wild	Anti-PD-1/PD-L1	NA	NA	34.8667	0	34.8667	0	CR
Pt49	Riaz et al. (PMID 29033130)	Melanoma	Wild	Anti-PD-1/PD-L1	NA	NA	27.5667	0	27.5667	0	PR
Pt5	Riaz et al. (PMID 29033130)	Melanoma	Wild	Anti-PD-1/PD-L1	NA	NA	7.4	1	1.86667	1	PD
Pt51	Riaz et al. (PMID 29033130)	Melanoma	Wild	Anti-PD-1/PD-L1	NA	NA	1.9	0	1.56667	1	PD
Pt52	Riaz et al. (PMID 29033130)	Melanoma	Wild	Anti-PD-1/PD-L1	NA	NA	15.8667	1	1.9	1	PD
Pt53	Riaz et al. (PMID 29033130)	Melanoma	Wild	Anti-PD-1/PD-L1	NA	NA	14.4333	1	8.76667	0	PR
Pt54	Riaz et al. (PMID 29033130)	Melanoma	Wild	Anti-PD-1/PD-L1	NA	NA	28.8333	0	28.8333	0	PR
Pt58	Riaz et al. (PMID 29033130)	Melanoma	Wild	Anti-PD-1/PD-L1	NA	NA	16.6333	1	3.76667	1	SD
Pt59	Riaz et al. (PMID 29033130)	Melanoma	Wild	Anti-PD-1/PD-L1	NA	NA	23.6	1	3.7	1	SD
Pt60	Riaz et al. (PMID 29033130)	Melanoma	Wild	Anti-PD-1/PD-L1	NA	NA	24.6	0	1.7	1	PD
Pt65	Riaz et al. (PMID 29033130)	Melanoma	Wild	Anti-PD-1/PD-L1	NA	NA	23.0667	0	9.33333	0	SD
Pt66	Riaz et al. (PMID 29033130)	Melanoma	Wild	Anti-PD-1/PD-L1	NA	NA	18.0667	1	1.96667	1	PD
Pt67	Riaz et al. (PMID 29033130)	Melanoma	Wild	Anti-PD-1/PD-L1	NA	NA	34.4	0	9.36667	1	SD
Pt68	Riaz et al. (PMID 29033130)	Melanoma	Wild	Anti-PD-1/PD-L1	NA	NA	28.0667	0	25.3	0	PR
Pt7	Riaz et al. (PMID 29033130)	Melanoma	Wild	Anti-PD-1/PD-L1	NA	NA	38.3	0	14.8667	0	PR
Pt70	Riaz et al. (PMID 29033130)	Melanoma	Wild	Anti-PD-1/PD-L1	NA	NA	10.3667	1	3.53333	0	SD
Pt71	Riaz et al. (PMID 29033130)	Melanoma	Wild	Anti-PD-1/PD-L1	NA	NA	8.2	0	5.86667	0	SD
Pt72	Riaz et al. (PMID 29033130)	Melanoma	Wild	Anti-PD-1/PD-L1	NA	NA	25.6667	1	11.1	1	PR
Pt73	Riaz et al. (PMID 29033130)	Melanoma	Wild	Anti-PD-1/PD-L1	NA	NA	9.36667	0	5.6	1	SD
Pt74	Riaz et al. (PMID 29033130)	Melanoma	Wild	Anti-PD-1/PD-L1	NA	NA	0.666667	1	0.666667	1	NA
Pt76	Riaz et al. (PMID 29033130)	Melanoma	Wild	Anti-PD-1/PD-L1	NA	NA	0.333333	1	0.333333	1	NA
Pt77	Riaz et al. (PMID 29033130)	Melanoma	Wild	Anti-PD-1/PD-L1	NA	NA	15.7	1	5.43333	1	SD
Pt79	Riaz et al. (PMID 29033130)	Melanoma	Wild	Anti-PD-1/PD-L1	NA	NA	7.26667	1	5.7	1	SD
Pt8	Riaz et al. (PMID 29033130)	Melanoma	Wild	Anti-PD-1/PD-L1	NA	NA	8.63333	1	1.73333	1	PD
Pt82	Riaz et al. (PMID 29033130)	Melanoma	Wild	Anti-PD-1/PD-L1	NA	NA	14.3	1	7.33333	1	SD
Pt83	Riaz et al. (PMID 29033130)	Melanoma	Wild	Anti-PD-1/PD-L1	NA	NA	15.4	0	11.7	0	SD
Pt84	Riaz et al. (PMID 29033130)	Melanoma	Wild	Anti-PD-1/PD-L1	NA	NA	5.03333	1	1.66667	1	PD
Pt85	Riaz et al. (PMID 29033130)	Melanoma	Wild	Anti-PD-1/PD-L1	NA	NA	30.1333	0	1.63333	1	PD
Pt86	Riaz et al. (PMID 29033130)	Melanoma	Wild	Anti-PD-1/PD-L1	NA	NA	9.06667	1	2.56667	1	PD
Pt87	Riaz et al. (PMID 29033130)	Melanoma	Wild	Anti-PD-1/PD-L1	NA	NA	32.4667	0	3.6	1	SD
Pt89	Riaz et al. (PMID 29033130)	Melanoma	Wild	Anti-PD-1/PD-L1	NA	NA	28.1333	1	7.3	1	SD
Pt9	Riaz et al. (PMID 29033130)	Melanoma	Wild	Anti-PD-1/PD-L1	NA	NA	3.06667	1	2.2	1	PD
Pt90	Riaz et al. (PMID 29033130)	Melanoma	Wild	Anti-PD-1/PD-L1	NA	NA	5.8	1	1.46667	1	PD
Pt92	Riaz et al. (PMID 29033130)	Melanoma	Wild	Anti-PD-1/PD-L1	NA	NA	11.1	1	6.33333	1	SD
Pt93	Riaz et al. (PMID 29033130)	Melanoma	Wild	Anti-PD-1/PD-L1	NA	NA	28.3	0	1.7	1	PD
Pt94	Riaz et al. (PMID 29033130)	Melanoma	Wild	Anti-PD-1/PD-L1	NA	NA	32.7	0	24.3	0	CR
Pt98	Riaz et al. (PMID 29033130)	Melanoma	Wild	Anti-PD-1/PD-L1	NA	NA	24.9	1	13.6	1	SD
CRNR4941	Snyder et al. (PMID 25409260)	Melanoma	XMut	Anti-CTLA-4	40	Female	86.4	0	NA	NA	NA	4
LSDNR3086	Snyder et al. (PMID 25409260)	Melanoma	Wild	Anti-CTLA-4	43	Male	31.2	1	NA	NA	NA	1.96667
NR6689	Snyder et al. (PMID 25409260)	Melanoma	Wild	Anti-CTLA-4	46	Female	15	1	NA	NA	NA	0.2
CRNR0244	Snyder et al. (PMID 25409260)	Melanoma	Wild	Anti-CTLA-4	49	Male	25.2	0	NA	NA	NA	18.6667
NR5784	Snyder et al. (PMID 25409260)	Melanoma	Wild	Anti-CTLA-4	58	Female	5.49041	1	NA	NA	NA	1.43333
LSD4691	Snyder et al. (PMID 25409260)	Melanoma	Wild	Anti-CTLA-4	62	Male	87.6	0	NA	NA	NA	13.4333
CR7623	Snyder et al. (PMID 25409260)	Melanoma	Wild	Anti-CTLA-4	62	Male	64.8	0	NA	NA	NA	16.5333
CR4880	Snyder et al. (PMID 25409260)	Melanoma	Wild	Anti-CTLA-4	63	Male	64.3068	0	NA	NA	NA	83.8
NR6842	Snyder et al. (PMID 25409260)	Melanoma	Wild	Anti-CTLA-4	64	Male	9.8	1	NA	NA	NA	0.166667
NR6721	Snyder et al. (PMID 25409260)	Melanoma	Wild	Anti-CTLA-4	64	Male	9.6	1	NA	NA	NA	4.36667
NR3156	Snyder et al. (PMID 25409260)	Melanoma	Wild	Anti-CTLA-4	68	Female	12.6247	1	NA	NA	NA	0.2
LSDNR1120	Snyder et al. (PMID 25409260)	Melanoma	Wild	Anti-CTLA-4	68	Male	55.2	0	NA	NA	NA	18.5333
NR8727	Snyder et al. (PMID 25409260)	Melanoma	Wild	Anti-CTLA-4	69	Male	5.19452	1	NA	NA	NA	0.0333333
LSDNR1650	Snyder et al. (PMID 25409260)	Melanoma	Wild	Anti-CTLA-4	71	Female	32.4	1	NA	NA	NA	0.933333
CRNR2472	Snyder et al. (PMID 25409260)	Melanoma	Wild	Anti-CTLA-4	71	Male	20.4	0	NA	NA	NA	21.3667
NR9341	Snyder et al. (PMID 25409260)	Melanoma	Wild	Anti-CTLA-4	77	Male	12.1315	1	NA	NA	NA	10.5
LSDNR9298	Snyder et al. (PMID 25409260)	Melanoma	Wild	Anti-CTLA-4	82	Female	50	0	NA	NA	NA	43.8667
PR03803	Snyder et al. (PMID 25409260)	Melanoma	Wild	Anti-CTLA-4	90	Male	94.6	1	NA	NA	NA	9.5
Pat131	Van Allen et al. (PMID 26359337)	Melanoma	Wild	Anti-CTLA-4	32	Male	8.56667	1	6.5	1	SD	3.33333
Pat70	Van Allen et al. (PMID 26359337)	Melanoma	Wild	Anti-CTLA-4	38	Male	17.7333	1	0.5	1	PD	2.53333
Pat38	Van Allen et al. (PMID 26359337)	Melanoma	Wild	Anti-CTLA-4	45	Male	51.3	0	10.0667	1	PR	78.4667
Pat37	Van Allen et al. (PMID 26359337)	Melanoma	Wild	Anti-CTLA-4	47	Female	2.33333	1	0.766667	1	PD	3.4
Pat92	Van Allen et al. (PMID 26359337)	Melanoma	Wild	Anti-CTLA-4	49	Male	4.1	1	2.8	1	PD	1.26667
Pat165	Van Allen et al. (PMID 26359337)	Melanoma	Wild	Anti-CTLA-4	50	Female	3.83333	1	3.16667	1	PD	2.3
Pat36	Van Allen et al. (PMID 26359337)	Melanoma	Wild	Anti-CTLA-4	52	Female	1.8	1	1.36667	1	PD	0.366667
Pat44	Van Allen et al. (PMID 26359337)	Melanoma	Wild	Anti-CTLA-4	57	Female	9.03333	1	2.06667	1	PD	1.03333
Pat19	Van Allen et al. (PMID 26359337)	Melanoma	Wild	Anti-CTLA-4	59	Male	5.83333	1	0.7	1	PD	15.2333
Pat88	Van Allen et al. (PMID 26359337)	Melanoma	Wild	Anti-CTLA-4	60	Female	32.9667	0	22.1667	0	SD	51.9333
Pat33	Van Allen et al. (PMID 26359337)	Melanoma	Wild	Anti-CTLA-4	65	Male	7.03333	1	7.03333	1	PD	0.433333
Pat63	Van Allen et al. (PMID 26359337)	Melanoma	Wild	Anti-CTLA-4	65	Male	34.6333	0	23.9333	0	CR	6.93333
Pat25	Van Allen et al. (PMID 26359337)	Melanoma	Wild	Anti-CTLA-4	69	Male	10.8333	1	2.23333	1	PD	1.63333
Pat109	Van Allen et al. (PMID 26359337)	Melanoma	Wild	Anti-CTLA-4	69	Male	2.76667	1	0.633333	1	PD	9.2
Pat78	Van Allen et al. (PMID 26359337)	Melanoma	Wild	Anti-CTLA-4	71	Female	1.26667	1	1.26667	1	PD	5.1
Pat40	Van Allen et al. (PMID 26359337)	Melanoma	Wild	Anti-CTLA-4	74	Male	1.13333	1	1.13333	1	PD	3.5
Pat130	Van Allen et al. (PMID 26359337)	Melanoma	Wild	Anti-CTLA-4	76	Male	1.5	1	0.566667	1	PD	6.5
Pat28	Van Allen et al. (PMID 26359337)	Melanoma	Wild	Anti-CTLA-4	77	Male	39.4667	1	2.56667	1	PD	24.6667
Pat29	Van Allen et al. (PMID 26359337)	Melanoma	Wild	Anti-CTLA-4	82	Male	44.2	0	11.3667	1	NA	1.16667
nsclc_mskcc_2018s54	Hellmann et la.(PMID 29657128)	Non-small cell lung cancer	Wild	Anti-PD-1/PD-L1+CTLA-4	42	Female	NA	NA	5.1581	1	SD	12.6667
nsclc_mskcc_2018s74	Hellmann et la.(PMID 29657128)	Non-small cell lung cancer	Wild	Anti-PD-1/PD-L1+CTLA-4	42	Male	NA	NA	7.9836	1	SD	23.2667
nsclc_mskcc_2018s14	Hellmann et la.(PMID 29657128)	Non-small cell lung cancer	Wild	Anti-PD-1/PD-L1+CTLA-4	43	Female	NA	NA	1.6756	1	PD	1.9
nsclc_mskcc_2018s53	Hellmann et la.(PMID 29657128)	Non-small cell lung cancer	Wild	Anti-PD-1/PD-L1+CTLA-4	46	Female	NA	NA	1.3799	1	PD	8.66667
nsclc_mskcc_2018s72	Hellmann et la.(PMID 29657128)	Non-small cell lung cancer	Wild	Anti-PD-1/PD-L1+CTLA-4	47	Male	NA	NA	2.2998	1	PD	0.8
nsclc_mskcc_2018s32	Hellmann et la.(PMID 29657128)	Non-small cell lung cancer	XMut	Anti-PD-1/PD-L1+CTLA-4	50	Female	NA	NA	18.9897	0	CR	12.6
nsclc_mskcc_2018s29	Hellmann et la.(PMID 29657128)	Non-small cell lung cancer	XMut	Anti-PD-1/PD-L1+CTLA-4	50	Female	NA	NA	2.5955	1	PD	14.6333
nsclc_mskcc_2018s48	Hellmann et la.(PMID 29657128)	Non-small cell lung cancer	Wild	Anti-PD-1/PD-L1+CTLA-4	51	Male	NA	NA	2.2998	0	SD	4
nsclc_mskcc_2018s75	Hellmann et la.(PMID 29657128)	Non-small cell lung cancer	Wild	Anti-PD-1/PD-L1+CTLA-4	51	Female	NA	NA	14.883	0	CR	12.9667
nsclc_mskcc_2018s15	Hellmann et la.(PMID 29657128)	Non-small cell lung cancer	Wild	Anti-PD-1/PD-L1+CTLA-4	53	Female	NA	NA	0.0329	0	PD	7.5
nsclc_mskcc_2018s41	Hellmann et la.(PMID 29657128)	Non-small cell lung cancer	Wild	Anti-PD-1/PD-L1+CTLA-4	53	Male	NA	NA	13.5359	0	CR	30.0333
nsclc_mskcc_2018s20	Hellmann et la.(PMID 29657128)	Non-small cell lung cancer	Wild	Anti-PD-1/PD-L1+CTLA-4	54	Male	NA	NA	1.4456	1	PD	5.46667
nsclc_mskcc_2018s49	Hellmann et la.(PMID 29657128)	Non-small cell lung cancer	Wild	Anti-PD-1/PD-L1+CTLA-4	55	Female	NA	NA	11.6632	1	SD	3.53333
nsclc_mskcc_2018s27	Hellmann et la.(PMID 29657128)	Non-small cell lung cancer	Wild	Anti-PD-1/PD-L1+CTLA-4	55	Male	NA	NA	4.1068	1	SD	5.73333
nsclc_mskcc_2018s59	Hellmann et la.(PMID 29657128)	Non-small cell lung cancer	Wild	Anti-PD-1/PD-L1+CTLA-4	56	Female	NA	NA	2.3326	1	PD	1.66667
nsclc_mskcc_2018s45	Hellmann et la.(PMID 29657128)	Non-small cell lung cancer	XMut	Anti-PD-1/PD-L1+CTLA-4	56	Male	NA	NA	2.2341	1	NE	4.9
nsclc_mskcc_2018s58	Hellmann et la.(PMID 29657128)	Non-small cell lung cancer	Wild	Anti-PD-1/PD-L1+CTLA-4	56	Female	NA	NA	1.8727	1	NE	5.06667
nsclc_mskcc_2018s7	Hellmann et la.(PMID 29657128)	Non-small cell lung cancer	Wild	Anti-PD-1/PD-L1+CTLA-4	56	Male	NA	NA	38.6037	0	PR	8
nsclc_mskcc_2018s51	Hellmann et la.(PMID 29657128)	Non-small cell lung cancer	XMut	Anti-PD-1/PD-L1+CTLA-4	56	Female	NA	NA	29.9302	0	PR	46.0667
nsclc_mskcc_2018s5	Hellmann et la.(PMID 29657128)	Non-small cell lung cancer	Wild	Anti-PD-1/PD-L1+CTLA-4	57	Male	NA	NA	7.5565	1	SD	4.66667
nsclc_mskcc_2018s37	Hellmann et la.(PMID 29657128)	Non-small cell lung cancer	Wild	Anti-PD-1/PD-L1+CTLA-4	57	Female	NA	NA	19.0226	0	PR	6.36667
nsclc_mskcc_2018s73	Hellmann et la.(PMID 29657128)	Non-small cell lung cancer	Wild	Anti-PD-1/PD-L1+CTLA-4	57	Female	NA	NA	16.46	0	PR	39.6
nsclc_mskcc_2018s11	Hellmann et la.(PMID 29657128)	Non-small cell lung cancer	Wild	Anti-PD-1/PD-L1+CTLA-4	58	Female	NA	NA	7.8193	1	SD	1.06667
nsclc_mskcc_2018s8	Hellmann et la.(PMID 29657128)	Non-small cell lung cancer	Wild	Anti-PD-1/PD-L1+CTLA-4	58	Male	NA	NA	2.9897	1	SD	5.7
nsclc_mskcc_2018s43	Hellmann et la.(PMID 29657128)	Non-small cell lung cancer	Wild	Anti-PD-1/PD-L1+CTLA-4	58	Female	NA	NA	5.0924	1	SD	8.76667
nsclc_mskcc_2018s42	Hellmann et la.(PMID 29657128)	Non-small cell lung cancer	XMut	Anti-PD-1/PD-L1+CTLA-4	59	Male	NA	NA	3.9425	1	SD	0.6
nsclc_mskcc_2018s19	Hellmann et la.(PMID 29657128)	Non-small cell lung cancer	XMut	Anti-PD-1/PD-L1+CTLA-4	59	Male	NA	NA	28.7803	0	PR	25.0333
nsclc_mskcc_2018s26	Hellmann et la.(PMID 29657128)	Non-small cell lung cancer	Wild	Anti-PD-1/PD-L1+CTLA-4	60	Female	NA	NA	23	0	PR	43.3
nsclc_mskcc_2018s3	Hellmann et la.(PMID 29657128)	Non-small cell lung cancer	Wild	Anti-PD-1/PD-L1+CTLA-4	61	Female	NA	NA	1.4784	0	SD	0.366667
nsclc_mskcc_2018s57	Hellmann et la.(PMID 29657128)	Non-small cell lung cancer	Wild	Anti-PD-1/PD-L1+CTLA-4	61	Female	NA	NA	2.037	1	PD	4.43333
nsclc_mskcc_2018s68	Hellmann et la.(PMID 29657128)	Non-small cell lung cancer	Wild	Anti-PD-1/PD-L1+CTLA-4	61	Male	NA	NA	7.9507	1	SD	16.8333
nsclc_mskcc_2018s36	Hellmann et la.(PMID 29657128)	Non-small cell lung cancer	Wild	Anti-PD-1/PD-L1+CTLA-4	62	Female	NA	NA	13.3388	1	SD	3.26667
nsclc_mskcc_2018s44	Hellmann et la.(PMID 29657128)	Non-small cell lung cancer	Wild	Anti-PD-1/PD-L1+CTLA-4	63	Male	NA	NA	0.3285	1	NE	4.76667
nsclc_mskcc_2018s50	Hellmann et la.(PMID 29657128)	Non-small cell lung cancer	Wild	Anti-PD-1/PD-L1+CTLA-4	63	Male	NA	NA	10.6119	1	SD	5.73333
nsclc_mskcc_2018s56	Hellmann et la.(PMID 29657128)	Non-small cell lung cancer	XMut	Anti-PD-1/PD-L1+CTLA-4	63	Female	NA	NA	6.5051	1	SD	5.9
nsclc_mskcc_2018s4	Hellmann et la.(PMID 29657128)	Non-small cell lung cancer	Wild	Anti-PD-1/PD-L1+CTLA-4	64	Male	NA	NA	3.7782	1	SD	3.73333
nsclc_mskcc_2018s25	Hellmann et la.(PMID 29657128)	Non-small cell lung cancer	Wild	Anti-PD-1/PD-L1+CTLA-4	65	Male	NA	NA	22.1437	1	SD	11.2
nsclc_mskcc_2018s35	Hellmann et la.(PMID 29657128)	Non-small cell lung cancer	Wild	Anti-PD-1/PD-L1+CTLA-4	66	Female	NA	NA	2.3326	1	PD	2.7
nsclc_mskcc_2018s38	Hellmann et la.(PMID 29657128)	Non-small cell lung cancer	Wild	Anti-PD-1/PD-L1+CTLA-4	66	Male	NA	NA	7.8193	1	PR	4.7
nsclc_mskcc_2018s47	Hellmann et la.(PMID 29657128)	Non-small cell lung cancer	XMut	Anti-PD-1/PD-L1+CTLA-4	66	Male	NA	NA	2.1027	1	PD	23.2667
nsclc_mskcc_2018s16	Hellmann et la.(PMID 29657128)	Non-small cell lung cancer	Wild	Anti-PD-1/PD-L1+CTLA-4	67	Male	NA	NA	3.6468	1	SD	0.733333
nsclc_mskcc_2018s6	Hellmann et la.(PMID 29657128)	Non-small cell lung cancer	Wild	Anti-PD-1/PD-L1+CTLA-4	67	Female	NA	NA	3.7125	1	SD	1.86667
nsclc_mskcc_2018s69	Hellmann et la.(PMID 29657128)	Non-small cell lung cancer	Wild	Anti-PD-1/PD-L1+CTLA-4	67	Female	NA	NA	2.6283	1	PD	2.03333
nsclc_mskcc_2018s31	Hellmann et la.(PMID 29657128)	Non-small cell lung cancer	Wild	Anti-PD-1/PD-L1+CTLA-4	67	Female	NA	NA	2.3326	1	PD	5.7
nsclc_mskcc_2018s52	Hellmann et la.(PMID 29657128)	Non-small cell lung cancer	Wild	Anti-PD-1/PD-L1+CTLA-4	67	Male	NA	NA	30.3244	0	PR	5.93333
nsclc_mskcc_2018s39	Hellmann et la.(PMID 29657128)	Non-small cell lung cancer	Wild	Anti-PD-1/PD-L1+CTLA-4	68	Female	NA	NA	0.03	0	NE	0.366667
nsclc_mskcc_2018s17	Hellmann et la.(PMID 29657128)	Non-small cell lung cancer	Wild	Anti-PD-1/PD-L1+CTLA-4	68	Female	NA	NA	12.0903	1	SD	0.4
nsclc_mskcc_2018s9	Hellmann et la.(PMID 29657128)	Non-small cell lung cancer	Wild	Anti-PD-1/PD-L1+CTLA-4	68	Female	NA	NA	7.7536	1	SD	2.9
nsclc_mskcc_2018s65	Hellmann et la.(PMID 29657128)	Non-small cell lung cancer	Wild	Anti-PD-1/PD-L1+CTLA-4	69	Female	NA	NA	4.7639	0	SD	1.66667
nsclc_mskcc_2018s46	Hellmann et la.(PMID 29657128)	Non-small cell lung cancer	Wild	Anti-PD-1/PD-L1+CTLA-4	69	Male	NA	NA	3.3183	1	SD	11.5667
nsclc_mskcc_2018s18	Hellmann et la.(PMID 29657128)	Non-small cell lung cancer	Wild	Anti-PD-1/PD-L1+CTLA-4	69	Female	NA	NA	29.7331	0	PR	25.4
nsclc_mskcc_2018s1	Hellmann et la.(PMID 29657128)	Non-small cell lung cancer	Wild	Anti-PD-1/PD-L1+CTLA-4	70	Female	NA	NA	1.4127	1	PD	2.06667
nsclc_mskcc_2018s71	Hellmann et la.(PMID 29657128)	Non-small cell lung cancer	Wild	Anti-PD-1/PD-L1+CTLA-4	71	Female	NA	NA	3.5154	1	SD	0.866667
nsclc_mskcc_2018s67	Hellmann et la.(PMID 29657128)	Non-small cell lung cancer	Wild	Anti-PD-1/PD-L1+CTLA-4	71	Female	NA	NA	2.5298	1	PD	1.6
nsclc_mskcc_2018s55	Hellmann et la.(PMID 29657128)	Non-small cell lung cancer	Wild	Anti-PD-1/PD-L1+CTLA-4	71	Male	NA	NA	2.1027	1	PD	6.83333
nsclc_mskcc_2018s22	Hellmann et la.(PMID 29657128)	Non-small cell lung cancer	Wild	Anti-PD-1/PD-L1+CTLA-4	72	Male	NA	NA	2.4969	1	PD	4.46667
nsclc_mskcc_2018s2	Hellmann et la.(PMID 29657128)	Non-small cell lung cancer	Wild	Anti-PD-1/PD-L1+CTLA-4	72	Male	NA	NA	6.8008	1	PR	7.36667
nsclc_mskcc_2018s10	Hellmann et la.(PMID 29657128)	Non-small cell lung cancer	Wild	Anti-PD-1/PD-L1+CTLA-4	72	Male	NA	NA	5.4209	1	SD	8.96667
nsclc_mskcc_2018s61	Hellmann et la.(PMID 29657128)	Non-small cell lung cancer	XMut	Anti-PD-1/PD-L1+CTLA-4	72	Male	NA	NA	1.7084	1	NE	18.6333
nsclc_mskcc_2018s40	Hellmann et la.(PMID 29657128)	Non-small cell lung cancer	Wild	Anti-PD-1/PD-L1+CTLA-4	73	Male	NA	NA	8.115	1	PR	9.86667
nsclc_mskcc_2018s60	Hellmann et la.(PMID 29657128)	Non-small cell lung cancer	Wild	Anti-PD-1/PD-L1+CTLA-4	73	Female	NA	NA	24.3121	0	PR	49.1
nsclc_mskcc_2018s64	Hellmann et la.(PMID 29657128)	Non-small cell lung cancer	Wild	Anti-PD-1/PD-L1+CTLA-4	74	Female	NA	NA	20.0411	0	PR	0.866667
nsclc_mskcc_2018s21	Hellmann et la.(PMID 29657128)	Non-small cell lung cancer	Wild	Anti-PD-1/PD-L1+CTLA-4	74	Female	NA	NA	21.5852	0	CR	9.8
nsclc_mskcc_2018s33	Hellmann et la.(PMID 29657128)	Non-small cell lung cancer	Wild	Anti-PD-1/PD-L1+CTLA-4	74	Male	NA	NA	21.6181	0	PR	11.0667
nsclc_mskcc_2018s63	Hellmann et la.(PMID 29657128)	Non-small cell lung cancer	Wild	Anti-PD-1/PD-L1+CTLA-4	75	Male	NA	NA	21.8809	0	PR	0.566667
nsclc_mskcc_2018s30	Hellmann et la.(PMID 29657128)	Non-small cell lung cancer	Wild	Anti-PD-1/PD-L1+CTLA-4	75	Male	NA	NA	21.191	0	PR	6.8
nsclc_mskcc_2018s23	Hellmann et la.(PMID 29657128)	Non-small cell lung cancer	XMut	Anti-PD-1/PD-L1+CTLA-4	75	Female	NA	NA	7.9836	1	PR	7.13333
nsclc_mskcc_2018s34	Hellmann et la.(PMID 29657128)	Non-small cell lung cancer	Wild	Anti-PD-1/PD-L1+CTLA-4	76	Male	NA	NA	22.34	0	PR	1.16667
nsclc_mskcc_2018s13	Hellmann et la.(PMID 29657128)	Non-small cell lung cancer	Wild	Anti-PD-1/PD-L1+CTLA-4	76	Male	NA	NA	23.9507	1	SD	1.9
nsclc_mskcc_2018s66	Hellmann et la.(PMID 29657128)	Non-small cell lung cancer	Wild	Anti-PD-1/PD-L1+CTLA-4	76	Male	NA	NA	0.0329	0	NE	7.33333
nsclc_mskcc_2018s28	Hellmann et la.(PMID 29657128)	Non-small cell lung cancer	Wild	Anti-PD-1/PD-L1+CTLA-4	77	Female	NA	NA	17.0513	1	SD	5.7
nsclc_mskcc_2018s12	Hellmann et la.(PMID 29657128)	Non-small cell lung cancer	Wild	Anti-PD-1/PD-L1+CTLA-4	82	Male	NA	NA	26.152	0	PR	7.6
nsclc_mskcc_2018s70	Hellmann et la.(PMID 29657128)	Non-small cell lung cancer	Wild	Anti-PD-1/PD-L1+CTLA-4	83	Male	NA	NA	1.2813	1	NE	9.83333
nsclc_mskcc_2018s24	Hellmann et la.(PMID 29657128)	Non-small cell lung cancer	Wild	Anti-PD-1/PD-L1+CTLA-4	85	Female	NA	NA	2.2669	1	PD	1.46667
nsclc_mskcc_2018s62	Hellmann et la.(PMID 29657128)	Non-small cell lung cancer	Wild	Anti-PD-1/PD-L1+CTLA-4	87	Male	NA	NA	22.9979	1	PR	49.9

## Sheet: Table S2
Table S2: The clinical data for each sample used in the validation cohort.
PATIENT_ID	NTRK3	SEX	OS_MONTHS	OS_STATUS	AGE_GROUP	Drug_type	SAMPLE_ID	CANCER_TYPE	SAMPLE_TYPE	AGE_AT_SEQ_REPORT	TMB_NONSYNONYMOUS	Overall_survival	Survival_status	Progression_free_survival	Progression_status	Best_treatment_response
P-0003555	Wild	Male	33	0:LIVING	31-50	Anti-PD-1/PD-L1	P-0003555-T01-IM5	Bladder Cancer	Primary	32	68.5104	33	0	NA	NA	NA
P-0009263	Wild	Male	12	1:DECEASED	31-50	Anti-PD-1/PD-L1+CTLA-4	P-0009263-T01-IM5	Bladder Cancer	Primary	39	23.4893	12	1	NA	NA	NA
P-0016402	Wild	Male	3	1:DECEASED	31-50	Anti-PD-1/PD-L1	P-0016402-T01-IM6	Bladder Cancer	Metastasis	42	1.7294	3	1	NA	NA	NA
P-0003719	Wild	Female	15	1:DECEASED	31-50	Anti-PD-1/PD-L1	P-0003719-T01-IM5	Bladder Cancer	Metastasis	43	47.9573	15	1	NA	NA	NA
P-0015456	Wild	Female	10	0:LIVING	31-50	Anti-PD-1/PD-L1	P-0015456-T01-IM6	Bladder Cancer	Primary	43	6.05289	10	0	NA	NA	NA
P-0003051	Wild	Male	7	1:DECEASED	31-50	Anti-PD-1/PD-L1+CTLA-4	P-0003051-T01-IM5	Bladder Cancer	Metastasis	46	9.7872	7	1	NA	NA	NA
P-0014418	Wild	Male	5	1:DECEASED	31-50	Anti-PD-1/PD-L1	P-0014418-T01-IM6	Bladder Cancer	Primary	46	13.8352	5	1	NA	NA	NA
P-0022520	Wild	Male	6	0:LIVING	31-50	Anti-PD-1/PD-L1	P-0022520-T01-IM6	Bladder Cancer	Primary	48	68.3111	6	0	NA	NA	NA
P-0000268	Wild	Male	35	0:LIVING	31-50	Anti-PD-1/PD-L1	P-0000268-T01-IM3	Bladder Cancer	Metastasis	49	5.54578	35	0	NA	NA	NA
P-0013283	Wild	Male	2	1:DECEASED	31-50	Anti-PD-1/PD-L1	P-0013283-T01-IM5	Bladder Cancer	Metastasis	49	6.85104	2	1	NA	NA	NA
P-0003814	Wild	Female	5	0:LIVING	50-60	Anti-PD-1/PD-L1	P-0003814-T01-IM5	Bladder Cancer	Primary	50	2.93616	5	0	NA	NA	NA
P-0005489	Wild	Male	16	1:DECEASED	31-50	Anti-PD-1/PD-L1	P-0005489-T01-IM5	Bladder Cancer	Metastasis	50	11.7446	16	1	NA	NA	NA
P-0009152	XMut	Male	25	0:LIVING	31-50	Anti-PD-1/PD-L1	P-0009152-T01-IM5	Bladder Cancer	Metastasis	51	58.7232	25	0	NA	NA	NA
P-0005727	Wild	Male	11	1:DECEASED	50-60	Anti-PD-1/PD-L1+CTLA-4	P-0005727-T01-IM5	Bladder Cancer	Metastasis	51	1.95744	11	1	NA	NA	NA
P-0007484	Wild	Female	7	0:LIVING	50-60	Anti-PD-1/PD-L1	P-0007484-T01-IM5	Bladder Cancer	Primary	51	5.87232	7	0	NA	NA	NA
P-0010254	Wild	Female	3	1:DECEASED	50-60	Anti-PD-1/PD-L1	P-0010254-T03-IM5	Bladder Cancer	Primary	51	0.97872	3	1	NA	NA	NA
P-0022034	Wild	Male	2	1:DECEASED	31-50	Anti-PD-1/PD-L1	P-0022034-T01-IM6	Bladder Cancer	Metastasis	51	0.864698	2	1	NA	NA	NA
P-0004226	Wild	Male	18	0:LIVING	50-60	Anti-PD-1/PD-L1	P-0004226-T01-IM5	Bladder Cancer	Primary	52	5.87232	18	0	NA	NA	NA
P-0008718	Wild	Male	8	0:LIVING	50-60	Anti-PD-1/PD-L1	P-0008718-T01-IM5	Bladder Cancer	Primary	52	10.7659	8	0	NA	NA	NA
P-0008816	Wild	Female	3	1:DECEASED	50-60	Anti-PD-1/PD-L1	P-0008816-T01-IM5	Bladder Cancer	Primary	52	0.97872	3	1	NA	NA	NA
P-0019101	Wild	Female	4	0:LIVING	50-60	Anti-PD-1/PD-L1	P-0019101-T01-IM6	Bladder Cancer	Primary	52	15.5646	4	0	NA	NA	NA
P-0017044	Wild	Male	13	0:LIVING	50-60	Anti-PD-1/PD-L1	P-0017044-T01-IM6	Bladder Cancer	Primary	53	5.18819	13	0	NA	NA	NA
P-0004050	Wild	Male	43	0:LIVING	50-60	Anti-PD-1/PD-L1	P-0004050-T01-IM3	Bladder Cancer	Primary	54	12.2007	43	0	NA	NA	NA
P-0010094	Wild	Male	6	1:DECEASED	50-60	Anti-PD-1/PD-L1	P-0010094-T01-IM5	Bladder Cancer	Primary	54	2.93616	6	1	NA	NA	NA
P-0004983	Wild	Male	34	0:LIVING	50-60	Anti-PD-1/PD-L1+CTLA-4	P-0004983-T01-IM5	Bladder Cancer	Primary	55	1.95744	34	0	NA	NA	NA
P-0005731	Wild	Male	1	1:DECEASED	50-60	Anti-PD-1/PD-L1	P-0005731-T01-IM5	Bladder Cancer	Metastasis	55	23.4893	1	1	NA	NA	NA
P-0007274	Wild	Male	6	0:LIVING	50-60	Anti-PD-1/PD-L1	P-0007274-T01-IM5	Bladder Cancer	Metastasis	55	2.93616	6	0	NA	NA	NA
P-0015661	Wild	Male	10	0:LIVING	50-60	Anti-PD-1/PD-L1	P-0015661-T01-IM6	Bladder Cancer	Metastasis	55	3.45879	10	0	NA	NA	NA
P-0019771	Wild	Female	7	0:LIVING	50-60	Anti-PD-1/PD-L1	P-0019771-T01-IM6	Bladder Cancer	Primary	55	6.05289	7	0	NA	NA	NA
P-0002472	Wild	Male	18	1:DECEASED	50-60	Anti-PD-1/PD-L1	P-0002472-T01-IM3	Bladder Cancer	Primary	56	2.21831	18	1	NA	NA	NA
P-0010199	Wild	Male	17	0:LIVING	50-60	Anti-PD-1/PD-L1	P-0010199-T01-IM5	Bladder Cancer	Primary	56	16.6382	17	0	NA	NA	NA
P-0014507	Wild	Female	6	0:LIVING	50-60	Anti-PD-1/PD-L1+CTLA-4	P-0014507-T01-IM6	Bladder Cancer	Primary	56	7.78228	6	0	NA	NA	NA
P-0003507	Wild	Male	1	1:DECEASED	50-60	Anti-PD-1/PD-L1	P-0003507-T01-IM5	Bladder Cancer	Metastasis	57	3.91488	1	1	NA	NA	NA
P-0006535	Wild	Female	19	1:DECEASED	50-60	Anti-PD-1/PD-L1	P-0006535-T01-IM5	Bladder Cancer	Metastasis	57	4.8936	19	1	NA	NA	NA
P-0007656	Wild	Male	18	0:LIVING	50-60	Anti-PD-1/PD-L1	P-0007656-T01-IM5	Bladder Cancer	Primary	57	13.7021	18	0	NA	NA	NA
P-0001135	Wild	Male	27	1:DECEASED	50-60	Anti-PD-1/PD-L1	P-0001135-T02-IM3	Bladder Cancer	Primary	58	4.43662	27	1	NA	NA	NA
P-0002614	Wild	Male	2	1:DECEASED	50-60	Anti-PD-1/PD-L1	P-0002614-T01-IM3	Bladder Cancer	Metastasis	58	7.76409	2	1	NA	NA	NA
P-0009101	Wild	Male	20	0:LIVING	50-60	Anti-PD-1/PD-L1	P-0009101-T01-IM5	Bladder Cancer	Metastasis	58	8.80848	20	0	NA	NA	NA
P-0009414	Wild	Male	9	1:DECEASED	50-60	Anti-PD-1/PD-L1	P-0009414-T01-IM5	Bladder Cancer	Metastasis	58	2.93616	9	1	NA	NA	NA
P-0019036	Wild	Male	6	0:LIVING	50-60	Anti-PD-1/PD-L1	P-0019036-T01-IM6	Bladder Cancer	Primary	58	5.18819	6	0	NA	NA	NA
P-0023425	Wild	Male	6	1:DECEASED	50-60	Anti-PD-1/PD-L1	P-0023425-T01-IM6	Bladder Cancer	Metastasis	58	11.2411	6	1	NA	NA	NA
P-0026723	Wild	Male	1	0:LIVING	50-60	Anti-PD-1/PD-L1	P-0026723-T01-IM6	Bladder Cancer	Primary	58	6.91758	1	0	NA	NA	NA
P-0002311	Wild	Male	39	0:LIVING	50-60	Anti-PD-1/PD-L1+CTLA-4	P-0002311-T01-IM3	Bladder Cancer	Metastasis	59	17.7465	39	0	NA	NA	NA
P-0003131	Wild	Male	28	0:LIVING	50-60	Anti-PD-1/PD-L1	P-0003131-T01-IM5	Bladder Cancer	Primary	59	6.85104	28	0	NA	NA	NA
P-0004366	Wild	Female	9	0:LIVING	61-70	Anti-PD-1/PD-L1+CTLA-4	P-0004366-T01-IM5	Bladder Cancer	Primary	59	4.8936	9	0	NA	NA	NA
P-0025120	Wild	Female	4	0:LIVING	50-60	Anti-PD-1/PD-L1	P-0025120-T01-IM6	Bladder Cancer	Primary	59	3.45879	4	0	NA	NA	NA
P-0000184	Wild	Male	8	0:LIVING	61-70	Anti-PD-1/PD-L1	P-0000184-T01-IM3	Bladder Cancer	Primary	60	8.87324	8	0	NA	NA	NA
P-0001074	Wild	Male	19	1:DECEASED	50-60	Anti-PD-1/PD-L1	P-0001074-T01-IM3	Bladder Cancer	Metastasis	60	21.074	19	1	NA	NA	NA
P-0001871	Wild	Female	2	1:DECEASED	61-70	Anti-PD-1/PD-L1	P-0001871-T01-IM3	Bladder Cancer	Primary	60	5.54578	2	1	NA	NA	NA
P-0002748	Wild	Male	4	1:DECEASED	50-60	Anti-PD-1/PD-L1	P-0002748-T02-IM5	Bladder Cancer	Primary	60	16.6382	4	1	NA	NA	NA
P-0004137	Wild	Male	27	0:LIVING	50-60	Anti-PD-1/PD-L1+CTLA-4	P-0004137-T01-IM5	Bladder Cancer	Primary	60	25.4467	27	0	NA	NA	NA
P-0010826	Wild	Male	7	0:LIVING	50-60	Anti-PD-1/PD-L1	P-0010826-T01-IM5	Bladder Cancer	Primary	60	3.91488	7	0	NA	NA	NA
P-0011524	Wild	Female	0	1:DECEASED	50-60	Anti-PD-1/PD-L1	P-0011524-T01-IM5	Bladder Cancer	Metastasis	60	15.6595	0	1	NA	NA	NA
P-0017276	Wild	Male	18	1:DECEASED	50-60	Anti-PD-1/PD-L1	P-0017276-T01-IM6	Bladder Cancer	Primary	60	5.18819	18	1	NA	NA	NA
P-0021848	Wild	Male	4	1:DECEASED	50-60	Anti-PD-1/PD-L1	P-0021848-T01-IM6	Bladder Cancer	Metastasis	60	4.32349	4	1	NA	NA	NA
P-0000423	Wild	Male	39	0:LIVING	61-70	Anti-PD-1/PD-L1	P-0000423-T01-IM3	Bladder Cancer	Primary	61	18.8556	39	0	NA	NA	NA
P-0005054	Wild	Female	3	0:LIVING	61-70	Anti-PD-1/PD-L1	P-0005054-T01-IM5	Bladder Cancer	Primary	61	19.5744	3	0	NA	NA	NA
P-0006570	Wild	Male	11	1:DECEASED	61-70	Anti-PD-1/PD-L1	P-0006570-T01-IM5	Bladder Cancer	Primary	61	2.93616	11	1	NA	NA	NA
P-0013861	Wild	Male	7	0:LIVING	61-70	Anti-PD-1/PD-L1	P-0013861-T01-IM5	Bladder Cancer	Metastasis	61	2.93616	7	0	NA	NA	NA
P-0013873	Wild	Male	7	1:DECEASED	61-70	Anti-PD-1/PD-L1	P-0013873-T01-IM5	Bladder Cancer	Primary	61	3.91488	7	1	NA	NA	NA
P-0014815	Wild	Female	7	1:DECEASED	50-60	Anti-PD-1/PD-L1	P-0014815-T01-IM6	Bladder Cancer	Primary	61	5.18819	7	1	NA	NA	NA
P-0015344	Wild	Male	6	0:LIVING	50-60	Anti-PD-1/PD-L1	P-0015344-T01-IM6	Bladder Cancer	Metastasis	61	56.2054	6	0	NA	NA	NA
P-0000063	Wild	Male	42	0:LIVING	61-70	Anti-PD-1/PD-L1	P-0000063-T01-IM3	Bladder Cancer	Primary	62	15.5282	42	0	NA	NA	NA
P-0001268	Wild	Male	9	1:DECEASED	61-70	Anti-PD-1/PD-L1	P-0001268-T01-IM3	Bladder Cancer	Metastasis	62	4.43662	9	1	NA	NA	NA
P-0003524	Wild	Male	39	0:LIVING	50-60	Anti-PD-1/PD-L1	P-0003524-T01-IM5	Bladder Cancer	Primary	62	42.0849	39	0	NA	NA	NA
P-0005947	Wild	Female	2	0:LIVING	61-70	Anti-PD-1/PD-L1	P-0005947-T01-IM5	Bladder Cancer	Primary	62	27.4042	2	0	NA	NA	NA
P-0010921	Wild	Male	11	1:DECEASED	61-70	Anti-PD-1/PD-L1	P-0010921-T01-IM5	Bladder Cancer	Primary	62	45.9998	11	1	NA	NA	NA
P-0011440	Wild	Male	2	1:DECEASED	61-70	Anti-PD-1/PD-L1	P-0011440-T01-IM5	Bladder Cancer	Metastasis	62	27.4042	2	1	NA	NA	NA
P-0015644	Wild	Female	26	0:LIVING	50-60	Anti-PD-1/PD-L1+CTLA-4	P-0015644-T01-IM6	Bladder Cancer	Metastasis	62	3.45879	26	0	NA	NA	NA
P-0018216	Wild	Male	1	0:LIVING	61-70	Anti-PD-1/PD-L1	P-0018216-T01-IM6	Bladder Cancer	Primary	62	8.64698	1	0	NA	NA	NA
P-0026970	Wild	Male	4	0:LIVING	61-70	Anti-PD-1/PD-L1	P-0026970-T01-IM6	Bladder Cancer	Metastasis	62	25.9409	4	0	NA	NA	NA
P-0000088	Wild	Male	12	1:DECEASED	61-70	Anti-PD-1/PD-L1	P-0000088-T01-IM3	Bladder Cancer	Metastasis	63	12.2007	12	1	NA	NA	NA
P-0001223	Wild	Male	3	1:DECEASED	61-70	Anti-PD-1/PD-L1+CTLA-4	P-0001223-T01-IM3	Bladder Cancer	Metastasis	63	7.76409	3	1	NA	NA	NA
P-0003698	Wild	Male	34	0:LIVING	61-70	Anti-PD-1/PD-L1+CTLA-4	P-0003698-T02-IM5	Bladder Cancer	Primary	63	7.82976	34	0	NA	NA	NA
P-0006934	Wild	Male	20	0:LIVING	61-70	Anti-PD-1/PD-L1	P-0006934-T01-IM5	Bladder Cancer	Primary	63	4.8936	20	0	NA	NA	NA
P-0019717	Wild	Male	12	0:LIVING	61-70	Anti-PD-1/PD-L1	P-0019717-T01-IM6	Bladder Cancer	Metastasis	63	13.8352	12	0	NA	NA	NA
P-0020995	Wild	Male	5	1:DECEASED	61-70	Anti-PD-1/PD-L1+CTLA-4	P-0020995-T01-IM6	Bladder Cancer	Metastasis	63	5.18819	5	1	NA	NA	NA
P-0020122	XMut	Female	9	0:LIVING	61-70	Anti-PD-1/PD-L1	P-0020122-T01-IM6	Bladder Cancer	Primary	64	21.6175	9	0	NA	NA	NA
P-0000222	Wild	Male	8	1:DECEASED	61-70	Anti-PD-1/PD-L1	P-0000222-T01-IM3	Bladder Cancer	Primary	64	13.3099	8	1	NA	NA	NA
P-0003377	Wild	Male	23	0:LIVING	61-70	Anti-PD-1/PD-L1	P-0003377-T01-IM5	Bladder Cancer	Primary	64	12.7234	23	0	NA	NA	NA
P-0005842	Wild	Male	15	0:LIVING	61-70	Anti-PD-1/PD-L1	P-0005842-T01-IM5	Bladder Cancer	Metastasis	64	40.1275	15	0	NA	NA	NA
P-0007421	Wild	Male	27	0:LIVING	61-70	Anti-PD-1/PD-L1	P-0007421-T01-IM5	Bladder Cancer	Primary	64	1.95744	27	0	NA	NA	NA
P-0010236	Wild	Male	25	0:LIVING	61-70	Anti-PD-1/PD-L1+CTLA-4	P-0010236-T01-IM5	Bladder Cancer	Metastasis	64	12.7234	25	0	NA	NA	NA
P-0011245	Wild	Male	4	1:DECEASED	61-70	Anti-PD-1/PD-L1	P-0011245-T01-IM5	Bladder Cancer	Primary	64	1.95744	4	1	NA	NA	NA
P-0011523	Wild	Female	21	0:LIVING	61-70	Anti-PD-1/PD-L1	P-0011523-T01-IM5	Bladder Cancer	Primary	64	5.87232	21	0	NA	NA	NA
P-0025174	Wild	Female	6	0:LIVING	61-70	Anti-PD-1/PD-L1	P-0025174-T01-IM6	Bladder Cancer	Primary	64	3.45879	6	0	NA	NA	NA
P-0004056	Wild	Male	6	1:DECEASED	61-70	Anti-PD-1/PD-L1	P-0004056-T01-IM5	Bladder Cancer	Primary	65	13.7021	6	1	NA	NA	NA
P-0006628	Wild	Male	19	0:LIVING	61-70	Anti-PD-1/PD-L1	P-0006628-T01-IM5	Bladder Cancer	Primary	65	3.91488	19	0	NA	NA	NA
P-0016149	Wild	Male	7	0:LIVING	61-70	Anti-PD-1/PD-L1+CTLA-4	P-0016149-T01-IM6	Bladder Cancer	Primary	65	15.5646	7	0	NA	NA	NA
P-0020835	Wild	Male	8	0:LIVING	61-70	Anti-PD-1/PD-L1	P-0020835-T01-IM6	Bladder Cancer	Primary	65	6.91758	8	0	NA	NA	NA
P-0021255	Wild	Male	5	0:LIVING	61-70	Anti-PD-1/PD-L1	P-0021255-T01-IM6	Bladder Cancer	Metastasis	65	14.6999	5	0	NA	NA	NA
P-0021484	Wild	Male	9	0:LIVING	61-70	Anti-PD-1/PD-L1	P-0021484-T01-IM6	Bladder Cancer	Primary	65	12.1058	9	0	NA	NA	NA
P-0000071	Wild	Male	43	0:LIVING	61-70	Anti-PD-1/PD-L1	P-0000071-T01-IM3	Bladder Cancer	Primary	66	9.9824	43	0	NA	NA	NA
P-0000880	Wild	Female	0	1:DECEASED	61-70	Anti-PD-1/PD-L1	P-0000880-T01-IM3	Bladder Cancer	Metastasis	66	7.76409	0	1	NA	NA	NA
P-0016624	Wild	Male	14	0:LIVING	61-70	Anti-PD-1/PD-L1	P-0016624-T01-IM6	Bladder Cancer	Metastasis	66	8.64698	14	0	NA	NA	NA
P-0017208	Wild	Male	3	1:DECEASED	61-70	Anti-PD-1/PD-L1	P-0017208-T01-IM6	Bladder Cancer	Primary	66	16.4293	3	1	NA	NA	NA
P-0021471	Wild	Female	6	0:LIVING	61-70	Anti-PD-1/PD-L1	P-0021471-T01-IM6	Bladder Cancer	Primary	66	6.05289	6	0	NA	NA	NA
P-0002715	Wild	Male	40	0:LIVING	61-70	Anti-PD-1/PD-L1	P-0002715-T01-IM3	Bladder Cancer	Primary	67	15.5282	40	0	NA	NA	NA
P-0003596	Wild	Male	4	1:DECEASED	61-70	Anti-PD-1/PD-L1	P-0003596-T01-IM5	Bladder Cancer	Primary	67	11.7446	4	1	NA	NA	NA
P-0008575	Wild	Male	11	1:DECEASED	61-70	Anti-PD-1/PD-L1	P-0008575-T01-IM5	Bladder Cancer	Metastasis	67	1.95744	11	1	NA	NA	NA
P-0014402	Wild	Female	2	1:DECEASED	61-70	Anti-PD-1/PD-L1	P-0014402-T01-IM6	Bladder Cancer	Primary	67	8.64698	2	1	NA	NA	NA
P-0014648	Wild	Male	21	0:LIVING	61-70	Anti-PD-1/PD-L1	P-0014648-T01-IM6	Bladder Cancer	Primary	67	5.18819	21	0	NA	NA	NA
P-0014909	Wild	Male	4	1:DECEASED	61-70	Anti-PD-1/PD-L1	P-0014909-T01-IM6	Bladder Cancer	Primary	67	5.18819	4	1	NA	NA	NA
P-0005021	XMut	Male	25	0:LIVING	61-70	Anti-PD-1/PD-L1	P-0005021-T01-IM5	Bladder Cancer	Primary	68	207.489	25	0	NA	NA	NA
P-0005266	Wild	Male	7	0:LIVING	61-70	Anti-PD-1/PD-L1	P-0005266-T01-IM5	Bladder Cancer	Metastasis	68	5.87232	7	0	NA	NA	NA
P-0009743	Wild	Male	2	1:DECEASED	61-70	Anti-PD-1/PD-L1	P-0009743-T01-IM5	Bladder Cancer	Metastasis	68	0	2	1	NA	NA	NA
P-0016316	Wild	Female	22	0:LIVING	61-70	Anti-PD-1/PD-L1	P-0016316-T01-IM6	Bladder Cancer	Primary	68	3.45879	22	0	NA	NA	NA
P-0016855	Wild	Male	12	0:LIVING	61-70	Anti-PD-1/PD-L1	P-0016855-T01-IM6	Bladder Cancer	Primary	68	6.91758	12	0	NA	NA	NA
P-0002575	Wild	Male	8	1:DECEASED	61-70	Anti-PD-1/PD-L1+CTLA-4	P-0002575-T01-IM3	Bladder Cancer	Primary	69	6.65493	8	1	NA	NA	NA
P-0003000	Wild	Male	3	1:DECEASED	61-70	Anti-PD-1/PD-L1	P-0003000-T01-IM3	Bladder Cancer	Metastasis	69	5.54578	3	1	NA	NA	NA
P-0005627	Wild	Male	28	0:LIVING	61-70	Anti-PD-1/PD-L1	P-0005627-T02-IM5	Bladder Cancer	Primary	69	26.4254	28	0	NA	NA	NA
P-0008425	Wild	Male	7	1:DECEASED	61-70	Anti-PD-1/PD-L1	P-0008425-T01-IM5	Bladder Cancer	Primary	69	5.87232	7	1	NA	NA	NA
P-0011187	Wild	Male	9	1:DECEASED	61-70	Anti-PD-1/PD-L1	P-0011187-T01-IM5	Bladder Cancer	Metastasis	69	8.80848	9	1	NA	NA	NA
P-0015501	Wild	Male	14	1:DECEASED	61-70	Anti-PD-1/PD-L1	P-0015501-T01-IM6	Bladder Cancer	Primary	69	14.6999	14	1	NA	NA	NA
P-0016720	Wild	Male	14	0:LIVING	61-70	Anti-PD-1/PD-L1	P-0016720-T01-IM6	Bladder Cancer	Primary	69	5.18819	14	0	NA	NA	NA
P-0002292	Wild	Male	15	1:DECEASED	61-70	Anti-PD-1/PD-L1	P-0002292-T01-IM3	Bladder Cancer	Primary	70	13.3099	15	1	NA	NA	NA
P-0003911	Wild	Female	3	1:DECEASED	61-70	Anti-PD-1/PD-L1	P-0003911-T01-IM5	Bladder Cancer	Metastasis	70	4.8936	3	1	NA	NA	NA
P-0009910	Wild	Female	5	1:DECEASED	61-70	Anti-PD-1/PD-L1	P-0009910-T01-IM5	Bladder Cancer	Metastasis	70	13.7021	5	1	NA	NA	NA
P-0015615	Wild	Male	21	0:LIVING	61-70	Anti-PD-1/PD-L1	P-0015615-T01-IM6	Bladder Cancer	Metastasis	70	2.59409	21	0	NA	NA	NA
P-0015965	Wild	Female	6	1:DECEASED	61-70	Anti-PD-1/PD-L1	P-0015965-T01-IM6	Bladder Cancer	Metastasis	70	2.59409	6	1	NA	NA	NA
P-0017712	Wild	Male	2	1:DECEASED	61-70	Anti-PD-1/PD-L1	P-0017712-T01-IM6	Bladder Cancer	Metastasis	70	7.78228	2	1	NA	NA	NA
P-0024263	Wild	Male	3	0:LIVING	61-70	Anti-PD-1/PD-L1	P-0024263-T01-IM6	Bladder Cancer	Primary	70	6.05289	3	0	NA	NA	NA
P-0008532	Wild	Male	9	1:DECEASED	61-70	Anti-PD-1/PD-L1	P-0008532-T01-IM5	Bladder Cancer	Metastasis	71	2.93616	9	1	NA	NA	NA
P-0015660	Wild	Male	28	1:DECEASED	61-70	Anti-PD-1/PD-L1+CTLA-4	P-0015660-T01-IM6	Bladder Cancer	Metastasis	71	8.64698	28	1	NA	NA	NA
P-0015966	Wild	Male	15	0:LIVING	61-70	Anti-PD-1/PD-L1	P-0015966-T01-IM6	Bladder Cancer	Metastasis	71	22.4822	15	0	NA	NA	NA
P-0016925	Wild	Male	4	1:DECEASED	61-70	Anti-PD-1/PD-L1	P-0016925-T01-IM6	Bladder Cancer	Primary	71	23.3468	4	1	NA	NA	NA
P-0017241	Wild	Male	4	1:DECEASED	61-70	Anti-PD-1/PD-L1	P-0017241-T01-IM6	Bladder Cancer	Primary	71	4.32349	4	1	NA	NA	NA
P-0018229	Wild	Female	5	0:LIVING	61-70	Anti-PD-1/PD-L1	P-0018229-T01-IM6	Bladder Cancer	Metastasis	71	4.32349	5	0	NA	NA	NA
P-0020167	Wild	Male	2	1:DECEASED	61-70	Anti-PD-1/PD-L1	P-0020167-T01-IM6	Bladder Cancer	Metastasis	71	4.32349	2	1	NA	NA	NA
P-0025827	Wild	Male	4	0:LIVING	61-70	Anti-PD-1/PD-L1	P-0025827-T01-IM6	Bladder Cancer	Primary	71	7.78228	4	0	NA	NA	NA
P-0000746	Wild	Male	6	1:DECEASED	>71	Anti-PD-1/PD-L1	P-0000746-T01-IM3	Bladder Cancer	Primary	72	14.419	6	1	NA	NA	NA
P-0001904	Wild	Female	1	1:DECEASED	>71	Anti-PD-1/PD-L1	P-0001904-T01-IM3	Bladder Cancer	Metastasis	72	5.54578	1	1	NA	NA	NA
P-0002404	Wild	Male	1	1:DECEASED	>71	Anti-PD-1/PD-L1	P-0002404-T01-IM3	Bladder Cancer	Primary	72	3.32747	1	1	NA	NA	NA
P-0009005	Wild	Male	4	1:DECEASED	>71	Anti-PD-1/PD-L1	P-0009005-T01-IM5	Bladder Cancer	Metastasis	72	10.7659	4	1	NA	NA	NA
P-0010079	Wild	Male	15	0:LIVING	>71	Anti-PD-1/PD-L1	P-0010079-T01-IM5	Bladder Cancer	Metastasis	72	2.93616	15	0	NA	NA	NA
P-0012870	Wild	Male	11	1:DECEASED	>71	Anti-PD-1/PD-L1	P-0012870-T03-IM6	Bladder Cancer	Primary	72	8.64698	11	1	NA	NA	NA
P-0013304	Wild	Male	5	1:DECEASED	>71	Anti-PD-1/PD-L1	P-0013304-T01-IM5	Bladder Cancer	Metastasis	72	0.97872	5	1	NA	NA	NA
P-0015067	Wild	Male	14	0:LIVING	>71	Anti-PD-1/PD-L1	P-0015067-T01-IM6	Bladder Cancer	Metastasis	72	7.78228	14	0	NA	NA	NA
P-0017599	Wild	Male	7	1:DECEASED	61-70	Anti-PD-1/PD-L1	P-0017599-T01-IM5	Bladder Cancer	Metastasis	72	5.87232	7	1	NA	NA	NA
P-0018028	Wild	Male	3	1:DECEASED	>71	Anti-PD-1/PD-L1	P-0018028-T01-IM6	Bladder Cancer	Primary	72	7.78228	3	1	NA	NA	NA
P-0024795	Wild	Female	3	0:LIVING	>71	Anti-PD-1/PD-L1	P-0024795-T01-IM6	Bladder Cancer	Primary	72	11.2411	3	0	NA	NA	NA
P-0006270	Wild	Female	9	1:DECEASED	>71	Anti-PD-1/PD-L1	P-0006270-T01-IM5	Bladder Cancer	Primary	73	2.93616	9	1	NA	NA	NA
P-0016546	Wild	Male	11	1:DECEASED	>71	Anti-PD-1/PD-L1	P-0016546-T01-IM6	Bladder Cancer	Primary	73	21.6175	11	1	NA	NA	NA
P-0020065	Wild	Male	10	0:LIVING	>71	Anti-PD-1/PD-L1	P-0020065-T01-IM6	Bladder Cancer	Metastasis	73	16.4293	10	0	NA	NA	NA
P-0020542	Wild	Male	12	0:LIVING	>71	Anti-PD-1/PD-L1	P-0020542-T01-IM6	Bladder Cancer	Primary	73	4.32349	12	0	NA	NA	NA
P-0021503	Wild	Male	7	1:DECEASED	>71	Anti-PD-1/PD-L1	P-0021503-T01-IM6	Bladder Cancer	Metastasis	73	20.7528	7	1	NA	NA	NA
P-0002668	Wild	Male	41	0:LIVING	>71	Anti-PD-1/PD-L1	P-0002668-T01-IM3	Bladder Cancer	Primary	74	9.9824	41	0	NA	NA	NA
P-0003024	Wild	Male	2	1:DECEASED	>71	Anti-PD-1/PD-L1+CTLA-4	P-0003024-T01-IM3	Bladder Cancer	Metastasis	74	33.2747	2	1	NA	NA	NA
P-0008062	Wild	Female	18	0:LIVING	>71	Anti-PD-1/PD-L1	P-0008062-T01-IM5	Bladder Cancer	Metastasis	74	6.85104	18	0	NA	NA	NA
P-0014422	Wild	Female	11	0:LIVING	>71	Anti-PD-1/PD-L1	P-0014422-T01-IM6	Bladder Cancer	Metastasis	74	17.294	11	0	NA	NA	NA
P-0021622	Wild	Male	8	0:LIVING	>71	Anti-PD-1/PD-L1	P-0021622-T01-IM6	Bladder Cancer	Primary	74	7.78228	8	0	NA	NA	NA
P-0024827	Wild	Male	1	0:LIVING	>71	Anti-PD-1/PD-L1	P-0024827-T01-IM6	Bladder Cancer	Primary	74	6.91758	1	0	NA	NA	NA
P-0006281	XMut	Male	28	0:LIVING	>71	Anti-PD-1/PD-L1+CTLA-4	P-0006281-T01-IM5	Bladder Cancer	Metastasis	75	24.468	28	0	NA	NA	NA
P-0003955	Wild	Male	15	1:DECEASED	>71	Anti-PD-1/PD-L1	P-0003955-T01-IM3	Bladder Cancer	Primary	75	6.65493	15	1	NA	NA	NA
P-0005150	Wild	Male	1	0:LIVING	>71	Anti-PD-1/PD-L1	P-0005150-T01-IM5	Bladder Cancer	Primary	75	0.97872	1	0	NA	NA	NA
P-0008290	Wild	Male	23	0:LIVING	>71	Anti-PD-1/PD-L1	P-0008290-T01-IM5	Bladder Cancer	Metastasis	75	6.85104	23	0	NA	NA	NA
P-0015649	Wild	Male	24	1:DECEASED	>71	Anti-PD-1/PD-L1+CTLA-4	P-0015649-T01-IM6	Bladder Cancer	Metastasis	75	44.0996	24	1	NA	NA	NA
P-0015663	Wild	Female	5	0:LIVING	>71	Anti-PD-1/PD-L1+CTLA-4	P-0015663-T01-IM6	Bladder Cancer	Primary	75	4.32349	5	0	NA	NA	NA
P-0019417	Wild	Male	14	1:DECEASED	>71	Anti-PD-1/PD-L1	P-0019417-T01-IM6	Bladder Cancer	Metastasis	75	15.5646	14	1	NA	NA	NA
P-0020592	Wild	Male	9	0:LIVING	>71	Anti-PD-1/PD-L1	P-0020592-T01-IM6	Bladder Cancer	Primary	75	6.05289	9	0	NA	NA	NA
P-0000535	Wild	Female	21	0:LIVING	>71	Anti-PD-1/PD-L1	P-0000535-T01-IM3	Bladder Cancer	Primary	76	26.6197	21	0	NA	NA	NA
P-0004240	Wild	Female	4	1:DECEASED	>71	Anti-PD-1/PD-L1+CTLA-4	P-0004240-T01-IM5	Bladder Cancer	Primary	76	5.87232	4	1	NA	NA	NA
P-0006097	Wild	Male	10	0:LIVING	>71	Anti-PD-1/PD-L1	P-0006097-T01-IM5	Bladder Cancer	Primary	76	6.85104	10	0	NA	NA	NA
P-0011439	Wild	Male	3	1:DECEASED	>71	Anti-PD-1/PD-L1	P-0011439-T01-IM5	Bladder Cancer	Metastasis	76	21.5318	3	1	NA	NA	NA
P-0015186	Wild	Female	3	1:DECEASED	>71	Anti-PD-1/PD-L1	P-0015186-T01-IM6	Bladder Cancer	Metastasis	76	11.2411	3	1	NA	NA	NA
P-0015716	Wild	Male	15	0:LIVING	>71	Anti-PD-1/PD-L1	P-0015716-T01-IM6	Bladder Cancer	Metastasis	76	6.05289	15	0	NA	NA	NA
P-0017658	Wild	Male	3	0:LIVING	>71	Anti-PD-1/PD-L1	P-0017658-T01-IM5	Bladder Cancer	Metastasis	76	9.7872	3	0	NA	NA	NA
P-0020047	Wild	Female	12	0:LIVING	>71	Anti-PD-1/PD-L1	P-0020047-T01-IM6	Bladder Cancer	Metastasis	76	8.64698	12	0	NA	NA	NA
P-0023138	Wild	Male	8	1:DECEASED	>71	Anti-PD-1/PD-L1	P-0023138-T01-IM6	Bladder Cancer	Primary	76	10.3764	8	1	NA	NA	NA
P-0027346	Wild	Male	3	0:LIVING	>71	Anti-PD-1/PD-L1	P-0027346-T01-IM6	Bladder Cancer	Primary	76	6.05289	3	0	NA	NA	NA
P-0012037	XMut	Male	3	1:DECEASED	>71	Anti-PD-1/PD-L1	P-0012037-T01-IM5	Bladder Cancer	Primary	77	4.8936	3	1	NA	NA	NA
P-0003841	Wild	Male	0	0:LIVING	>71	Anti-PD-1/PD-L1	P-0003841-T01-IM5	Bladder Cancer	Metastasis	77	11.7446	0	0	NA	NA	NA
P-0005650	Wild	Male	8	1:DECEASED	>71	Anti-PD-1/PD-L1+CTLA-4	P-0005650-T01-IM5	Bladder Cancer	Metastasis	77	3.91488	8	1	NA	NA	NA
P-0009846	Wild	Male	1	1:DECEASED	>71	Anti-PD-1/PD-L1	P-0009846-T01-IM5	Bladder Cancer	Primary	77	11.7446	1	1	NA	NA	NA
P-0012183	Wild	Male	16	0:LIVING	>71	Anti-PD-1/PD-L1	P-0012183-T01-IM5	Bladder Cancer	Primary	77	7.82976	16	0	NA	NA	NA
P-0000872	Wild	Male	10	1:DECEASED	>71	Anti-PD-1/PD-L1	P-0000872-T01-IM3	Bladder Cancer	Primary	78	0	10	1	NA	NA	NA
P-0001578	Wild	Male	3	1:DECEASED	>71	Anti-PD-1/PD-L1	P-0001578-T01-IM3	Bladder Cancer	Primary	78	11.0916	3	1	NA	NA	NA
P-0002576	Wild	Male	22	1:DECEASED	>71	Anti-PD-1/PD-L1	P-0002576-T02-IM5	Bladder Cancer	Primary	78	2.93616	22	1	NA	NA	NA
P-0008168	Wild	Male	4	0:LIVING	>71	Anti-PD-1/PD-L1	P-0008168-T01-IM5	Bladder Cancer	Metastasis	78	6.85104	4	0	NA	NA	NA
P-0008595	Wild	Female	24	0:LIVING	>71	Anti-PD-1/PD-L1	P-0008595-T01-IM5	Bladder Cancer	Primary	78	20.5531	24	0	NA	NA	NA
P-0016915	Wild	Male	7	0:LIVING	>71	Anti-PD-1/PD-L1	P-0016915-T01-IM6	Bladder Cancer	Metastasis	79	8.64698	7	0	NA	NA	NA
P-0017313	Wild	Male	19	1:DECEASED	>71	Anti-PD-1/PD-L1	P-0017313-T01-IM6	Bladder Cancer	Primary	79	3.45879	19	1	NA	NA	NA
P-0018541	Wild	Male	3	0:LIVING	>71	Anti-PD-1/PD-L1	P-0018541-T01-IM6	Bladder Cancer	Primary	79	7.78228	3	0	NA	NA	NA
P-0020121	Wild	Female	8	0:LIVING	>71	Anti-PD-1/PD-L1	P-0020121-T01-IM6	Bladder Cancer	Primary	79	15.5646	8	0	NA	NA	NA
P-0021532	Wild	Female	7	0:LIVING	>71	Anti-PD-1/PD-L1	P-0021532-T01-IM6	Bladder Cancer	Primary	79	12.9705	7	0	NA	NA	NA
P-0024544	Wild	Female	16	0:LIVING	>71	Anti-PD-1/PD-L1	P-0024544-T01-IM6	Bladder Cancer	Primary	79	34.5879	16	0	NA	NA	NA
P-0000891	Wild	Male	11	1:DECEASED	>71	Anti-PD-1/PD-L1	P-0000891-T01-IM3	Bladder Cancer	Primary	80	11.0916	11	1	NA	NA	NA
P-0006800	Wild	Male	7	1:DECEASED	>71	Anti-PD-1/PD-L1	P-0006800-T01-IM5	Bladder Cancer	Metastasis	80	7.82976	7	1	NA	NA	NA
P-0012706	Wild	Male	22	0:LIVING	>71	Anti-PD-1/PD-L1	P-0012706-T01-IM5	Bladder Cancer	Metastasis	80	1.95744	22	0	NA	NA	NA
P-0014470	Wild	Male	16	0:LIVING	>71	Anti-PD-1/PD-L1	P-0014470-T01-IM6	Bladder Cancer	Metastasis	80	20.7528	16	0	NA	NA	NA
P-0015920	Wild	Male	15	0:LIVING	>71	Anti-PD-1/PD-L1	P-0015920-T01-IM6	Bladder Cancer	Metastasis	80	41.5055	15	0	NA	NA	NA
P-0017472	Wild	Male	6	0:LIVING	>71	Anti-PD-1/PD-L1	P-0017472-T01-IM6	Bladder Cancer	Primary	80	20.7528	6	0	NA	NA	NA
P-0020086	Wild	Female	10	0:LIVING	>71	Anti-PD-1/PD-L1	P-0020086-T01-IM6	Bladder Cancer	Metastasis	80	16.4293	10	0	NA	NA	NA
P-0025888	Wild	Female	8	0:LIVING	>71	Anti-PD-1/PD-L1	P-0025888-T01-IM6	Bladder Cancer	Primary	80	4.32349	8	0	NA	NA	NA
P-0026160	Wild	Male	1	0:LIVING	>71	Anti-PD-1/PD-L1	P-0026160-T01-IM6	Bladder Cancer	Primary	80	1.7294	1	0	NA	NA	NA
P-0004257	XMut	Female	6	0:LIVING	>71	Anti-PD-1/PD-L1	P-0004257-T01-IM5	Bladder Cancer	Primary	81	8.80848	6	0	NA	NA	NA
P-0000544	Wild	Male	5	1:DECEASED	>71	Anti-PD-1/PD-L1	P-0000544-T01-IM3	Bladder Cancer	Metastasis	81	0	5	1	NA	NA	NA
P-0012840	Wild	Male	15	1:DECEASED	>71	Anti-PD-1/PD-L1	P-0012840-T01-IM5	Bladder Cancer	Metastasis	81	5.87232	15	1	NA	NA	NA
P-0015137	Wild	Male	17	1:DECEASED	>71	Anti-PD-1/PD-L1	P-0015137-T01-IM6	Bladder Cancer	Metastasis	81	12.9705	17	1	NA	NA	NA
P-0016618	Wild	Female	10	0:LIVING	>71	Anti-PD-1/PD-L1	P-0016618-T01-IM6	Bladder Cancer	Metastasis	81	0.864698	10	0	NA	NA	NA
P-0021004	Wild	Male	5	0:LIVING	>71	Anti-PD-1/PD-L1	P-0021004-T01-IM6	Bladder Cancer	Primary	81	5.18819	5	0	NA	NA	NA
P-0003097	Wild	Female	13	1:DECEASED	>71	Anti-PD-1/PD-L1	P-0003097-T01-IM5	Bladder Cancer	Metastasis	82	5.87232	13	1	NA	NA	NA
P-0008439	Wild	Female	6	1:DECEASED	>71	Anti-PD-1/PD-L1	P-0008439-T01-IM5	Bladder Cancer	Metastasis	82	18.5957	6	1	NA	NA	NA
P-0015923	Wild	Male	38	0:LIVING	>71	Anti-PD-1/PD-L1	P-0015923-T01-IM6	Bladder Cancer	Primary	82	31.1291	38	0	NA	NA	NA
P-0025079	Wild	Male	6	0:LIVING	>71	Anti-PD-1/PD-L1	P-0025079-T01-IM6	Bladder Cancer	Primary	82	2.59409	6	0	NA	NA	NA
P-0014421	Wild	Male	35	0:LIVING	>71	Anti-PD-1/PD-L1+CTLA-4	P-0014421-T01-IM6	Bladder Cancer	Primary	83	4.32349	35	0	NA	NA	NA
P-0022068	Wild	Female	3	0:LIVING	>71	Anti-PD-1/PD-L1	P-0022068-T01-IM6	Bladder Cancer	Primary	83	6.91758	3	0	NA	NA	NA
P-0023450	Wild	Male	2	0:LIVING	>71	Anti-PD-1/PD-L1	P-0023450-T01-IM6	Bladder Cancer	Primary	83	16.4293	2	0	NA	NA	NA
P-0025313	Wild	Female	8	0:LIVING	>71	Anti-PD-1/PD-L1	P-0025313-T01-IM6	Bladder Cancer	Metastasis	83	4.32349	8	0	NA	NA	NA
P-0002568	Wild	Male	39	0:LIVING	>71	Anti-PD-1/PD-L1	P-0002568-T01-IM3	Bladder Cancer	Metastasis	84	2.21831	39	0	NA	NA	NA
P-0021644	Wild	Male	9	0:LIVING	>71	Anti-PD-1/PD-L1	P-0021644-T01-IM6	Bladder Cancer	Metastasis	84	0	9	0	NA	NA	NA
P-0004387	Wild	Male	6	1:DECEASED	>71	Anti-PD-1/PD-L1	P-0004387-T01-IM5	Bladder Cancer	Primary	85	1.95744	6	1	NA	NA	NA
P-0009898	Wild	Male	1	1:DECEASED	>71	Anti-PD-1/PD-L1	P-0009898-T01-IM5	Bladder Cancer	Primary	85	7.82976	1	1	NA	NA	NA
P-0021528	Wild	Male	11	0:LIVING	>71	Anti-PD-1/PD-L1	P-0021528-T01-IM6	Bladder Cancer	Metastasis	86	13.8352	11	0	NA	NA	NA
P-0026892	Wild	Male	3	0:LIVING	>71	Anti-PD-1/PD-L1	P-0026892-T01-IM6	Bladder Cancer	Metastasis	89	6.05289	3	0	NA	NA	NA
P-0005176	Wild	Female	5	1:DECEASED	31-50	Anti-CTLA-4	P-0005176-T01-IM5	Breast Cancer	Metastasis	31	1.95744	5	1	NA	NA	NA
P-0007349	Wild	Female	14	1:DECEASED	31-50	Anti-CTLA-4	P-0007349-T01-IM5	Breast Cancer	Primary	32	4.8936	14	1	NA	NA	NA
P-0015713	Wild	Female	9	0:LIVING	31-50	Anti-PD-1/PD-L1	P-0015713-T01-IM6	Breast Cancer	Metastasis	33	0.864698	9	0	NA	NA	NA
P-0000638	Wild	Female	1	1:DECEASED	31-50	Anti-CTLA-4	P-0000638-T01-IM3	Breast Cancer	Metastasis	35	0	1	1	NA	NA	NA
P-0000447	Wild	Female	12	1:DECEASED	31-50	Anti-PD-1/PD-L1+CTLA-4	P-0000447-T01-IM3	Breast Cancer	Primary	36	3.32747	12	1	NA	NA	NA
P-0012825	Wild	Female	14	0:LIVING	31-50	Anti-PD-1/PD-L1	P-0012825-T02-IM6	Breast Cancer	Metastasis	37	0.864698	14	0	NA	NA	NA
P-0003273	Wild	Female	6	1:DECEASED	31-50	Anti-CTLA-4	P-0003273-T01-IM5	Breast Cancer	Metastasis	39	0.97872	6	1	NA	NA	NA
P-0000392	Wild	Female	3	1:DECEASED	31-50	Anti-PD-1/PD-L1	P-0000392-T01-IM3	Breast Cancer	Metastasis	40	3.32747	3	1	NA	NA	NA
P-0009297	Wild	Female	14	1:DECEASED	31-50	Anti-PD-1/PD-L1	P-0009297-T01-IM5	Breast Cancer	Metastasis	40	8.80848	14	1	NA	NA	NA
P-0000057	Wild	Female	0	1:DECEASED	31-50	Anti-PD-1/PD-L1	P-0000057-T01-IM3	Breast Cancer	Primary	41	5.54578	0	1	NA	NA	NA
P-0001785	Wild	Female	13	0:LIVING	31-50	Anti-PD-1/PD-L1	P-0001785-T02-IM3	Breast Cancer	Primary	43	2.21831	13	0	NA	NA	NA
P-0002789	Wild	Female	9	1:DECEASED	31-50	Anti-CTLA-4	P-0002789-T01-IM3	Breast Cancer	Metastasis	43	2.21831	9	1	NA	NA	NA
P-0005712	Wild	Female	20	0:LIVING	31-50	Anti-CTLA-4	P-0005712-T01-IM5	Breast Cancer	Primary	43	3.91488	20	0	NA	NA	NA
P-0006227	Wild	Female	4	1:DECEASED	31-50	Anti-PD-1/PD-L1	P-0006227-T01-IM5	Breast Cancer	Metastasis	43	6.85104	4	1	NA	NA	NA
P-0006842	Wild	Female	9	1:DECEASED	31-50	Anti-PD-1/PD-L1+CTLA-4	P-0006842-T01-IM5	Breast Cancer	Metastasis	44	5.87232	9	1	NA	NA	NA
P-0007014	Wild	Female	5	1:DECEASED	31-50	Anti-CTLA-4	P-0007014-T01-IM5	Breast Cancer	Primary	44	2.93616	5	1	NA	NA	NA
P-0009727	Wild	Female	4	1:DECEASED	31-50	Anti-CTLA-4	P-0009727-T01-IM5	Breast Cancer	Primary	44	0.97872	4	1	NA	NA	NA
P-0000704	Wild	Female	1	1:DECEASED	31-50	Anti-CTLA-4	P-0000704-T01-IM3	Breast Cancer	Metastasis	49	9.9824	1	1	NA	NA	NA
P-0003241	Wild	Female	2	1:DECEASED	31-50	Anti-PD-1/PD-L1+CTLA-4	P-0003241-T01-IM5	Breast Cancer	Primary	49	2.93616	2	1	NA	NA	NA
P-0012803	XMut	Female	3	0:LIVING	31-50	Anti-CTLA-4	P-0012803-T01-IM5	Breast Cancer	Metastasis	50	4.8936	3	0	NA	NA	NA
P-0000247	Wild	Female	17	0:LIVING	50-60	Anti-PD-1/PD-L1+CTLA-4	P-0000247-T01-IM3	Breast Cancer	Metastasis	50	2.21831	17	0	NA	NA	NA
P-0008571	Wild	Female	15	0:LIVING	31-50	Anti-PD-1/PD-L1	P-0008571-T01-IM5	Breast Cancer	Metastasis	50	1.95744	15	0	NA	NA	NA
P-0000422	Wild	Female	1	1:DECEASED	50-60	Anti-CTLA-4	P-0000422-T01-IM3	Breast Cancer	Metastasis	52	6.65493	1	1	NA	NA	NA
P-0010994	Wild	Female	4	1:DECEASED	50-60	Anti-PD-1/PD-L1	P-0010994-T01-IM5	Breast Cancer	Metastasis	52	3.91488	4	1	NA	NA	NA
P-0015905	Wild	Female	1	1:DECEASED	50-60	Anti-PD-1/PD-L1	P-0015905-T01-IM6	Breast Cancer	Primary	52	4.32349	1	1	NA	NA	NA
P-0010252	Wild	Female	18	0:LIVING	50-60	Anti-PD-1/PD-L1	P-0010252-T01-IM5	Breast Cancer	Metastasis	53	4.8936	18	0	NA	NA	NA
P-0009498	Wild	Female	13	0:LIVING	50-60	Anti-PD-1/PD-L1	P-0009498-T01-IM5	Breast Cancer	Metastasis	54	4.8936	13	0	NA	NA	NA
P-0016226	Wild	Female	22	1:DECEASED	50-60	Anti-CTLA-4	P-0016226-T01-IM6	Breast Cancer	Metastasis	54	3.45879	22	1	NA	NA	NA
P-0005855	Wild	Female	3	1:DECEASED	50-60	Anti-CTLA-4	P-0005855-T01-IM5	Breast Cancer	Metastasis	57	5.87232	3	1	NA	NA	NA
P-0001312	Wild	Female	3	1:DECEASED	50-60	Anti-PD-1/PD-L1	P-0001312-T01-IM3	Breast Cancer	Metastasis	58	2.21831	3	1	NA	NA	NA
P-0003265	Wild	Female	19	1:DECEASED	50-60	Anti-CTLA-4	P-0003265-T01-IM5	Breast Cancer	Metastasis	58	3.91488	19	1	NA	NA	NA
P-0002626	Wild	Female	60	0:LIVING	50-60	Anti-CTLA-4	P-0002626-T01-IM3	Breast Cancer	Metastasis	59	0	60	0	NA	NA	NA
P-0013210	Wild	Female	3	1:DECEASED	50-60	Anti-PD-1/PD-L1	P-0013210-T01-IM5	Breast Cancer	Metastasis	59	2.93616	3	1	NA	NA	NA
P-0003224	Wild	Female	28	0:LIVING	50-60	Anti-CTLA-4	P-0003224-T01-IM5	Breast Cancer	Metastasis	60	14.6808	28	0	NA	NA	NA
P-0015445	Wild	Female	2	1:DECEASED	50-60	Anti-PD-1/PD-L1	P-0015445-T01-IM6	Breast Cancer	Primary	60	2.59409	2	1	NA	NA	NA
P-0000547	Wild	Female	3	1:DECEASED	61-70	Anti-PD-1/PD-L1	P-0000547-T01-IM3	Breast Cancer	Metastasis	62	6.65493	3	1	NA	NA	NA
P-0002041	Wild	Female	4	1:DECEASED	61-70	Anti-PD-1/PD-L1	P-0002041-T01-IM3	Breast Cancer	Metastasis	62	0	4	1	NA	NA	NA
P-0009364	Wild	Female	19	0:LIVING	61-70	Anti-PD-1/PD-L1	P-0009364-T01-IM5	Breast Cancer	Metastasis	63	28.3829	19	0	NA	NA	NA
P-0010800	Wild	Female	10	1:DECEASED	61-70	Anti-CTLA-4	P-0010800-T01-IM5	Breast Cancer	Metastasis	64	3.91488	10	1	NA	NA	NA
P-0010669	Wild	Female	2	0:LIVING	61-70	Anti-CTLA-4	P-0010669-T01-IM5	Breast Cancer	Primary	66	3.91488	2	0	NA	NA	NA
P-0005131	Wild	Female	5	1:DECEASED	61-70	Anti-CTLA-4	P-0005131-T01-IM5	Breast Cancer	Metastasis	68	1.95744	5	1	NA	NA	NA
P-0005274	Wild	Female	2	1:DECEASED	61-70	Anti-PD-1/PD-L1	P-0005274-T01-IM5	Breast Cancer	Metastasis	69	5.87232	2	1	NA	NA	NA
P-0007127	Wild	Female	15	1:DECEASED	>71	Anti-CTLA-4	P-0007127-T01-IM5	Breast Cancer	Metastasis	73	3.91488	15	1	NA	NA	NA
P-0011552	Wild	Female	4	1:DECEASED	>71	Anti-PD-1/PD-L1	P-0011552-T01-IM5	Breast Cancer	Metastasis	73	5.87232	4	1	NA	NA	NA
P-0002653	Wild	Female	3	1:DECEASED	<30	Anti-PD-1/PD-L1	P-0002653-T01-IM3	Colorectal Cancer	Primary	19	2.21831	3	1	NA	NA	NA
P-0009830	Wild	Male	30	0:LIVING	<30	Anti-PD-1/PD-L1	P-0009830-T01-IM5	Colorectal Cancer	Metastasis	25	44.0424	30	0	NA	NA	NA
P-0011144	Wild	Female	4	1:DECEASED	<30	Anti-PD-1/PD-L1	P-0011144-T01-IM5	Colorectal Cancer	Primary	26	4.8936	4	1	NA	NA	NA
P-0018277	Wild	Male	1	0:LIVING	<30	Anti-PD-1/PD-L1+CTLA-4	P-0018277-T01-IM6	Colorectal Cancer	Metastasis	27	8.64698	1	0	NA	NA	NA
P-0019949	Wild	Male	8	0:LIVING	<30	Anti-PD-1/PD-L1	P-0019949-T01-IM6	Colorectal Cancer	Metastasis	28	37.182	8	0	NA	NA	NA
P-0002049	Wild	Female	39	0:LIVING	31-50	Anti-PD-1/PD-L1	P-0002049-T01-IM3	Colorectal Cancer	Primary	33	54.3486	39	0	NA	NA	NA
P-0017986	Wild	Female	2	0:LIVING	31-50	Anti-PD-1/PD-L1	P-0017986-T01-IM6	Colorectal Cancer	Primary	33	60.5289	2	0	NA	NA	NA
P-0005634	Wild	Male	4	1:DECEASED	31-50	Anti-CTLA-4	P-0005634-T01-IM5	Colorectal Cancer	Metastasis	34	8.80848	4	1	NA	NA	NA
P-0006708	Wild	Female	4	1:DECEASED	31-50	Anti-PD-1/PD-L1	P-0006708-T01-IM5	Colorectal Cancer	Metastasis	34	9.7872	4	1	NA	NA	NA
P-0006743	Wild	Female	2	0:LIVING	31-50	Anti-PD-1/PD-L1	P-0006743-T01-IM5	Colorectal Cancer	Metastasis	34	5.87232	2	0	NA	NA	NA
P-0014010	Wild	Female	3	1:DECEASED	31-50	Anti-PD-1/PD-L1	P-0014010-T01-IM5	Colorectal Cancer	Metastasis	36	6.85104	3	1	NA	NA	NA
P-0003285	Wild	Female	3	0:LIVING	31-50	Anti-PD-1/PD-L1	P-0003285-T01-IM5	Colorectal Cancer	Metastasis	37	4.8936	3	0	NA	NA	NA
P-0005151	Wild	Male	30	0:LIVING	31-50	Anti-PD-1/PD-L1	P-0005151-T01-IM5	Colorectal Cancer	Primary	37	65.5742	30	0	NA	NA	NA
P-0013096	Wild	Male	19	0:LIVING	31-50	Anti-PD-1/PD-L1	P-0013096-T01-IM5	Colorectal Cancer	Primary	37	2.93616	19	0	NA	NA	NA
P-0004362	Wild	Male	34	1:DECEASED	31-50	Anti-PD-1/PD-L1	P-0004362-T01-IM5	Colorectal Cancer	Primary	38	68.5104	34	1	NA	NA	NA
P-0007410	Wild	Male	29	0:LIVING	31-50	Anti-PD-1/PD-L1	P-0007410-T01-IM5	Colorectal Cancer	Metastasis	38	1.95744	29	0	NA	NA	NA
P-0011195	Wild	Female	5	1:DECEASED	31-50	Anti-PD-1/PD-L1	P-0011195-T01-IM5	Colorectal Cancer	Metastasis	38	2.93616	5	1	NA	NA	NA
P-0012133	Wild	Male	12	1:DECEASED	31-50	Anti-PD-1/PD-L1+CTLA-4	P-0012133-T01-IM5	Colorectal Cancer	Metastasis	39	3.91488	12	1	NA	NA	NA
P-0012281	Wild	Male	10	0:LIVING	31-50	Anti-PD-1/PD-L1	P-0012281-T01-IM5	Colorectal Cancer	Metastasis	39	2.93616	10	0	NA	NA	NA
P-0001531	Wild	Male	12	0:LIVING	31-50	Anti-PD-1/PD-L1	P-0001531-T01-IM3	Colorectal Cancer	Primary	40	4.43662	12	0	NA	NA	NA
P-0005762	Wild	Male	10	0:LIVING	31-50	Anti-PD-1/PD-L1	P-0005762-T01-IM5	Colorectal Cancer	Metastasis	41	1.95744	10	0	NA	NA	NA
P-0018580	Wild	Female	5	1:DECEASED	31-50	Anti-PD-1/PD-L1	P-0018580-T01-IM6	Colorectal Cancer	Primary	41	4.32349	5	1	NA	NA	NA
P-0000699	Wild	Male	3	0:LIVING	31-50	Anti-PD-1/PD-L1+CTLA-4	P-0000699-T01-IM3	Colorectal Cancer	Primary	43	5.54578	3	0	NA	NA	NA
P-0004783	Wild	Male	21	0:LIVING	31-50	Anti-PD-1/PD-L1+CTLA-4	P-0004783-T01-IM5	Colorectal Cancer	Primary	43	46.9785	21	0	NA	NA	NA
P-0001771	Wild	Female	10	1:DECEASED	31-50	Anti-PD-1/PD-L1	P-0001771-T01-IM3	Colorectal Cancer	Primary	44	4.43662	10	1	NA	NA	NA
P-0005998	Wild	Male	9	1:DECEASED	31-50	Anti-PD-1/PD-L1	P-0005998-T01-IM5	Colorectal Cancer	Metastasis	44	3.91488	9	1	NA	NA	NA
P-0023128	Wild	Male	11	0:LIVING	31-50	Anti-PD-1/PD-L1	P-0023128-T01-IM6	Colorectal Cancer	Primary	44	12.1058	11	0	NA	NA	NA
P-0002855	Wild	Female	2	1:DECEASED	31-50	Anti-PD-1/PD-L1+CTLA-4	P-0002855-T01-IM3	Colorectal Cancer	Primary	45	5.54578	2	1	NA	NA	NA
P-0001371	Wild	Male	10	1:DECEASED	31-50	Anti-PD-1/PD-L1	P-0001371-T01-IM3	Colorectal Cancer	Metastasis	46	0	10	1	NA	NA	NA
P-0020878	Wild	Male	18	0:LIVING	31-50	Anti-PD-1/PD-L1	P-0020878-T01-IM6	Colorectal Cancer	Metastasis	46	2.59409	18	0	NA	NA	NA
P-0002042	Wild	Male	7	1:DECEASED	31-50	Anti-PD-1/PD-L1	P-0002042-T01-IM3	Colorectal Cancer	Primary	47	11.0916	7	1	NA	NA	NA
P-0003365	Wild	Male	7	1:DECEASED	31-50	Anti-PD-1/PD-L1	P-0003365-T01-IM5	Colorectal Cancer	Metastasis	47	1.95744	7	1	NA	NA	NA
P-0019475	Wild	Male	1	1:DECEASED	31-50	Anti-PD-1/PD-L1	P-0019475-T01-IM6	Colorectal Cancer	Metastasis	47	91.658	1	1	NA	NA	NA
P-0001702	Wild	Female	9	1:DECEASED	31-50	Anti-PD-1/PD-L1	P-0001702-T01-IM3	Colorectal Cancer	Primary	48	5.54578	9	1	NA	NA	NA
P-0010966	Wild	Male	4	0:LIVING	31-50	Anti-PD-1/PD-L1	P-0010966-T01-IM5	Colorectal Cancer	Metastasis	48	3.91488	4	0	NA	NA	NA
P-0022977	Wild	Female	5	0:LIVING	31-50	Anti-PD-1/PD-L1	P-0022977-T01-IM6	Colorectal Cancer	Metastasis	48	2.59409	5	0	NA	NA	NA
P-0007081	Wild	Male	3	1:DECEASED	31-50	Anti-PD-1/PD-L1	P-0007081-T02-IM5	Colorectal Cancer	Metastasis	49	2.93616	3	1	NA	NA	NA
P-0012115	Wild	Male	19	0:LIVING	31-50	Anti-PD-1/PD-L1	P-0012115-T01-IM5	Colorectal Cancer	Primary	49	53.8296	19	0	NA	NA	NA
P-0002730	Wild	Male	6	1:DECEASED	50-60	Anti-PD-1/PD-L1	P-0002730-T01-IM3	Colorectal Cancer	Primary	50	4.43662	6	1	NA	NA	NA
P-0006213	Wild	Male	5	1:DECEASED	50-60	Anti-PD-1/PD-L1	P-0006213-T01-IM5	Colorectal Cancer	Metastasis	50	8.80848	5	1	NA	NA	NA
P-0019267	Wild	Female	7	0:LIVING	31-50	Anti-PD-1/PD-L1	P-0019267-T01-IM6	Colorectal Cancer	Primary	50	5.18819	7	0	NA	NA	NA
P-0021304	Wild	Male	6	0:LIVING	31-50	Anti-PD-1/PD-L1	P-0021304-T01-IM6	Colorectal Cancer	Metastasis	50	83.8757	6	0	NA	NA	NA
P-0006587	Wild	Male	9	0:LIVING	50-60	Anti-PD-1/PD-L1	P-0006587-T01-IM5	Colorectal Cancer	Primary	51	10.7659	9	0	NA	NA	NA
P-0010742	Wild	Female	15	1:DECEASED	31-50	Anti-PD-1/PD-L1	P-0010742-T01-IM5	Colorectal Cancer	Metastasis	51	4.8936	15	1	NA	NA	NA
P-0007090	Wild	Male	13	1:DECEASED	50-60	Anti-PD-1/PD-L1	P-0007090-T02-IM5	Colorectal Cancer	Metastasis	52	4.8936	13	1	NA	NA	NA
P-0010238	Wild	Female	21	1:DECEASED	50-60	Anti-PD-1/PD-L1	P-0010238-T01-IM5	Colorectal Cancer	Metastasis	52	7.82976	21	1	NA	NA	NA
P-0012708	Wild	Female	5	0:LIVING	50-60	Anti-PD-1/PD-L1+CTLA-4	P-0012708-T01-IM5	Colorectal Cancer	Primary	52	4.8936	5	0	NA	NA	NA
P-0011357	XMut	Male	17	0:LIVING	50-60	Anti-PD-1/PD-L1	P-0011357-T01-IM5	Colorectal Cancer	Primary	53	199.659	17	0	NA	NA	NA
P-0001693	Wild	Female	2	1:DECEASED	50-60	Anti-PD-1/PD-L1	P-0001693-T02-IM3	Colorectal Cancer	Primary	53	9.9824	2	1	NA	NA	NA
P-0013354	Wild	Female	2	1:DECEASED	50-60	Anti-PD-1/PD-L1	P-0013354-T01-IM5	Colorectal Cancer	Metastasis	53	4.8936	2	1	NA	NA	NA
P-0014565	Wild	Female	12	1:DECEASED	50-60	Anti-PD-1/PD-L1	P-0014565-T01-IM6	Colorectal Cancer	Primary	53	6.05289	12	1	NA	NA	NA
P-0016767	Wild	Female	10	0:LIVING	50-60	Anti-PD-1/PD-L1	P-0016767-T01-IM6	Colorectal Cancer	Metastasis	53	12.1058	10	0	NA	NA	NA
P-0008651	XMut	Female	15	0:LIVING	50-60	Anti-PD-1/PD-L1	P-0008651-T01-IM5	Colorectal Cancer	Primary	55	6.85104	15	0	NA	NA	NA
P-0007486	Wild	Female	2	1:DECEASED	50-60	Anti-PD-1/PD-L1	P-0007486-T01-IM5	Colorectal Cancer	Metastasis	55	5.87232	2	1	NA	NA	NA
P-0024824	Wild	Male	3	0:LIVING	50-60	Anti-PD-1/PD-L1	P-0024824-T01-IM6	Colorectal Cancer	Metastasis	55	10.3764	3	0	NA	NA	NA
P-0005132	Wild	Male	31	0:LIVING	50-60	Anti-PD-1/PD-L1	P-0005132-T01-IM5	Colorectal Cancer	Metastasis	56	6.85104	31	0	NA	NA	NA
P-0006933	Wild	Female	14	1:DECEASED	50-60	Anti-PD-1/PD-L1	P-0006933-T01-IM5	Colorectal Cancer	Primary	56	4.8936	14	1	NA	NA	NA
P-0007567	Wild	Male	7	0:LIVING	50-60	Anti-PD-1/PD-L1+CTLA-4	P-0007567-T01-IM5	Colorectal Cancer	Metastasis	56	7.82976	7	0	NA	NA	NA
P-0019710	Wild	Male	7	1:DECEASED	50-60	Anti-PD-1/PD-L1	P-0019710-T01-IM6	Colorectal Cancer	Primary	56	6.05289	7	1	NA	NA	NA
P-0023731	Wild	Female	2	0:LIVING	50-60	Anti-PD-1/PD-L1	P-0023731-T01-IM6	Colorectal Cancer	Metastasis	56	6.05289	2	0	NA	NA	NA
P-0007405	Wild	Male	30	0:LIVING	50-60	Anti-PD-1/PD-L1	P-0007405-T01-IM5	Colorectal Cancer	Primary	57	6.85104	30	0	NA	NA	NA
P-0001808	Wild	Male	10	0:LIVING	50-60	Anti-PD-1/PD-L1	P-0001808-T01-IM3	Colorectal Cancer	Metastasis	58	176.356	10	0	NA	NA	NA
P-0002792	Wild	Male	8	0:LIVING	50-60	Anti-PD-1/PD-L1	P-0002792-T01-IM3	Colorectal Cancer	Primary	58	5.54578	8	0	NA	NA	NA
P-0015851	Wild	Male	5	0:LIVING	50-60	Anti-PD-1/PD-L1	P-0015851-T01-IM6	Colorectal Cancer	Primary	58	30.2644	5	0	NA	NA	NA
P-0000721	Wild	Female	4	1:DECEASED	50-60	Anti-PD-1/PD-L1	P-0000721-T01-IM3	Colorectal Cancer	Primary	59	7.76409	4	1	NA	NA	NA
P-0004803	Wild	Male	6	0:LIVING	50-60	Anti-PD-1/PD-L1	P-0004803-T01-IM5	Colorectal Cancer	Metastasis	59	7.82976	6	0	NA	NA	NA
P-0007771	Wild	Female	5	1:DECEASED	50-60	Anti-PD-1/PD-L1	P-0007771-T01-IM5	Colorectal Cancer	Metastasis	59	4.8936	5	1	NA	NA	NA
P-0007997	Wild	Female	1	1:DECEASED	50-60	Anti-PD-1/PD-L1	P-0007997-T01-IM5	Colorectal Cancer	Primary	59	51.8721	1	1	NA	NA	NA
P-0016522	Wild	Male	8	0:LIVING	50-60	Anti-PD-1/PD-L1	P-0016522-T01-IM6	Colorectal Cancer	Primary	59	43.2349	8	0	NA	NA	NA
P-0011071	XMut	Male	2	1:DECEASED	50-60	Anti-PD-1/PD-L1	P-0011071-T01-IM5	Colorectal Cancer	Metastasis	60	80.255	2	1	NA	NA	NA
P-0013087	Wild	Male	8	0:LIVING	50-60	Anti-PD-1/PD-L1+CTLA-4	P-0013087-T01-IM5	Colorectal Cancer	Metastasis	60	6.85104	8	0	NA	NA	NA
P-0017697	Wild	Female	8	1:DECEASED	50-60	Anti-PD-1/PD-L1	P-0017697-T01-IM6	Colorectal Cancer	Metastasis	60	89.9286	8	1	NA	NA	NA
P-0004011	Wild	Male	9	0:LIVING	61-70	Anti-PD-1/PD-L1	P-0004011-T01-IM5	Colorectal Cancer	Metastasis	61	63.6168	9	0	NA	NA	NA
P-0012728	Wild	Female	7	1:DECEASED	61-70	Anti-PD-1/PD-L1	P-0012728-T01-IM5	Colorectal Cancer	Metastasis	61	9.7872	7	1	NA	NA	NA
P-0000682	Wild	Male	17	0:LIVING	61-70	Anti-PD-1/PD-L1	P-0000682-T01-IM3	Colorectal Cancer	Metastasis	62	13.3099	17	0	NA	NA	NA
P-0004140	Wild	Male	7	1:DECEASED	61-70	Anti-PD-1/PD-L1	P-0004140-T01-IM5	Colorectal Cancer	Metastasis	62	10.7659	7	1	NA	NA	NA
P-0011068	Wild	Male	9	0:LIVING	61-70	Anti-PD-1/PD-L1	P-0011068-T01-IM5	Colorectal Cancer	Primary	62	43.0637	9	0	NA	NA	NA
P-0020399	Wild	Male	15	0:LIVING	61-70	Anti-PD-1/PD-L1	P-0020399-T01-IM6	Colorectal Cancer	Metastasis	62	60.5289	15	0	NA	NA	NA
P-0009363	Wild	Female	4	1:DECEASED	61-70	Anti-PD-1/PD-L1	P-0009363-T01-IM5	Colorectal Cancer	Primary	63	6.85104	4	1	NA	NA	NA
P-0010587	Wild	Female	11	0:LIVING	61-70	Anti-PD-1/PD-L1	P-0010587-T01-IM5	Colorectal Cancer	Primary	63	84.1699	11	0	NA	NA	NA
P-0016314	Wild	Female	3	1:DECEASED	61-70	Anti-PD-1/PD-L1	P-0016314-T01-IM6	Colorectal Cancer	Primary	63	109.817	3	1	NA	NA	NA
P-0012249	Wild	Female	12	0:LIVING	61-70	Anti-PD-1/PD-L1	P-0012249-T01-IM5	Colorectal Cancer	Metastasis	64	37.1913	12	0	NA	NA	NA
P-0021834	Wild	Male	27	0:LIVING	61-70	Anti-PD-1/PD-L1	P-0021834-T01-IM6	Colorectal Cancer	Primary	64	6.05289	27	0	NA	NA	NA
P-0001170	Wild	Male	13	1:DECEASED	61-70	Anti-PD-1/PD-L1	P-0001170-T01-IM3	Colorectal Cancer	Primary	65	8.87324	13	1	NA	NA	NA
P-0010499	Wild	Male	2	1:DECEASED	61-70	Anti-PD-1/PD-L1	P-0010499-T01-IM5	Colorectal Cancer	Primary	65	151.702	2	1	NA	NA	NA
P-0005823	XMut	Male	29	0:LIVING	61-70	Anti-PD-1/PD-L1	P-0005823-T01-IM5	Colorectal Cancer	Metastasis	66	88.0848	29	0	NA	NA	NA
P-0014182	Wild	Male	2	0:LIVING	61-70	Anti-PD-1/PD-L1	P-0014182-T01-IM6	Colorectal Cancer	Primary	66	7.78228	2	0	NA	NA	NA
P-0017766	Wild	Male	6	0:LIVING	61-70	Anti-PD-1/PD-L1+CTLA-4	P-0017766-T01-IM6	Colorectal Cancer	Metastasis	66	7.78228	6	0	NA	NA	NA
P-0020252	Wild	Female	9	0:LIVING	61-70	Anti-PD-1/PD-L1	P-0020252-T01-IM6	Colorectal Cancer	Metastasis	66	63.123	9	0	NA	NA	NA
P-0000762	Wild	Male	17	1:DECEASED	61-70	Anti-PD-1/PD-L1	P-0000762-T01-IM3	Colorectal Cancer	Metastasis	67	4.43662	17	1	NA	NA	NA
P-0000940	Wild	Female	10	1:DECEASED	61-70	Anti-PD-1/PD-L1	P-0000940-T01-IM3	Colorectal Cancer	Metastasis	67	9.9824	10	1	NA	NA	NA
P-0004051	Wild	Male	28	0:LIVING	61-70	Anti-PD-1/PD-L1	P-0004051-T01-IM5	Colorectal Cancer	Metastasis	68	68.5104	28	0	NA	NA	NA
P-0008746	Wild	Female	11	0:LIVING	61-70	Anti-PD-1/PD-L1	P-0008746-T01-IM5	Colorectal Cancer	Primary	68	47.9573	11	0	NA	NA	NA
P-0008841	Wild	Female	16	0:LIVING	61-70	Anti-PD-1/PD-L1	P-0008841-T01-IM5	Colorectal Cancer	Primary	68	3.91488	16	0	NA	NA	NA
P-0025532	Wild	Female	3	0:LIVING	61-70	Anti-PD-1/PD-L1	P-0025532-T01-IM6	Colorectal Cancer	Primary	68	40.6408	3	0	NA	NA	NA
P-0001867	Wild	Male	9	1:DECEASED	61-70	Anti-PD-1/PD-L1	P-0001867-T01-IM3	Colorectal Cancer	Metastasis	70	14.419	9	1	NA	1	SD
P-0019428	Wild	Female	5	0:LIVING	61-70	Anti-PD-1/PD-L1	P-0019428-T01-IM6	Colorectal Cancer	Primary	70	44.0996	5	0	NA	NA	NA
P-0001807	Wild	Male	2	1:DECEASED	>71	Anti-PD-1/PD-L1	P-0001807-T01-IM3	Colorectal Cancer	Metastasis	71	5.54578	2	1	NA	NA	NA
P-0006735	Wild	Male	20	0:LIVING	>71	Anti-PD-1/PD-L1	P-0006735-T01-IM5	Colorectal Cancer	Metastasis	71	3.91488	20	0	NA	NA	NA
P-0011288	Wild	Female	4	0:LIVING	>71	Anti-PD-1/PD-L1+CTLA-4	P-0011288-T01-IM5	Colorectal Cancer	Primary	71	10.7659	4	0	NA	NA	NA
P-0008662	Wild	Female	9	0:LIVING	>71	Anti-PD-1/PD-L1	P-0008662-T01-IM5	Colorectal Cancer	Primary	72	1.95744	9	0	NA	NA	NA
P-0004494	Wild	Female	11	0:LIVING	>71	Anti-PD-1/PD-L1	P-0004494-T01-IM5	Colorectal Cancer	Primary	73	9.7872	11	0	NA	NA	NA
P-0005522	Wild	Female	17	0:LIVING	>71	Anti-PD-1/PD-L1	P-0005522-T01-IM5	Colorectal Cancer	Metastasis	73	6.85104	17	0	NA	NA	NA
P-0017263	Wild	Male	2	0:LIVING	>71	Anti-PD-1/PD-L1	P-0017263-T01-IM6	Colorectal Cancer	Metastasis	74	3.45879	2	0	NA	NA	NA
P-0010581	Wild	Male	30	0:LIVING	>71	Anti-PD-1/PD-L1	P-0010581-T01-IM5	Colorectal Cancer	Metastasis	75	66.5529	30	0	NA	NA	NA
P-0015237	Wild	Female	12	0:LIVING	>71	Anti-PD-1/PD-L1	P-0015237-T01-IM6	Colorectal Cancer	Metastasis	75	51.8819	12	0	NA	NA	NA
P-0016181	Wild	Female	67	0:LIVING	>71	Anti-PD-1/PD-L1	P-0016181-T01-IM6	Colorectal Cancer	Primary	77	65.7171	67	0	NA	NA	NA
P-0000739	Wild	Male	31	1:DECEASED	>71	Anti-PD-1/PD-L1	P-0000739-T01-IM3	Colorectal Cancer	Metastasis	79	7.76409	31	1	NA	NA	NA
P-0007495	Wild	Male	5	0:LIVING	>71	Anti-PD-1/PD-L1	P-0007495-T01-IM5	Colorectal Cancer	Primary	81	13.7021	5	0	NA	NA	NA
P-0013462	Wild	Female	15	0:LIVING	>71	Anti-PD-1/PD-L1	P-0013462-T01-IM5	Colorectal Cancer	Metastasis	82	43.0637	15	0	NA	NA	NA
P-0001260	Wild	Female	1	1:DECEASED	<30	Anti-PD-1/PD-L1	P-0001260-T01-IM3	Esophagogastric Cancer	Metastasis	23	3.32747	1	1	NA	1	PD
P-0006318	Wild	Female	0	1:DECEASED	<30	Anti-PD-1/PD-L1	P-0006318-T01-IM5	Esophagogastric Cancer	Metastasis	25	0.97872	0	1	NA	NA	NA
P-0012720	Wild	Male	1	1:DECEASED	<30	Anti-PD-1/PD-L1+CTLA-4	P-0012720-T01-IM5	Esophagogastric Cancer	Primary	25	2.93616	1	1	NA	NA	NA
P-0018464	Wild	Male	22	0:LIVING	<30	Anti-PD-1/PD-L1	P-0018464-T01-IM6	Esophagogastric Cancer	Metastasis	26	6.05289	22	0	NA	1	PR
P-0014118	Wild	Male	2	1:DECEASED	<30	Anti-PD-1/PD-L1+CTLA-4	P-0014118-T01-IM5	Esophagogastric Cancer	Metastasis	28	0	2	1	NA	NA	NA
P-0019271	Wild	Male	9	0:LIVING	31-50	Anti-PD-1/PD-L1+CTLA-4	P-0019271-T01-IM6	Esophagogastric Cancer	Primary	32	6.91758	9	0	NA	NA	NA
P-0027031	Wild	Female	5	0:LIVING	31-50	Anti-PD-1/PD-L1	P-0027031-T01-IM6	Esophagogastric Cancer	Metastasis	32	2.59409	5	0	NA	NA	NA
P-0007895	Wild	Male	1	1:DECEASED	31-50	Anti-PD-1/PD-L1+CTLA-4	P-0007895-T01-IM5	Esophagogastric Cancer	Primary	37	3.91488	1	1	NA	NA	NA
P-0007531	Wild	Female	27	1:DECEASED	31-50	Anti-PD-1/PD-L1	P-0007531-T01-IM5	Esophagogastric Cancer	Primary	38	8.80848	27	1	NA	0	PR
P-0015904	Wild	Male	6	0:LIVING	31-50	Anti-PD-1/PD-L1+CTLA-4	P-0015904-T01-IM6	Esophagogastric Cancer	Metastasis	38	11.2411	6	0	NA	NA	NA
P-0006911	Wild	Male	1	1:DECEASED	31-50	Anti-PD-1/PD-L1	P-0006911-T01-IM5	Esophagogastric Cancer	Metastasis	40	0	1	1	NA	NA	NA
P-0008305	Wild	Male	1	1:DECEASED	31-50	Anti-PD-1/PD-L1	P-0008305-T01-IM5	Esophagogastric Cancer	Primary	40	2.93616	1	1	NA	NA	NA
P-0013106	Wild	Male	49	0:LIVING	31-50	Anti-PD-1/PD-L1	P-0013106-T01-IM5	Esophagogastric Cancer	Metastasis	41	14.6808	49	0	NA	0	CR
P-0004605	Wild	Male	7	0:LIVING	31-50	Anti-PD-1/PD-L1	P-0004605-T01-IM5	Esophagogastric Cancer	Primary	42	5.87232	7	0	NA	NA	NA
P-0010099	Wild	Male	0	0:LIVING	31-50	Anti-PD-1/PD-L1	P-0010099-T01-IM5	Esophagogastric Cancer	Metastasis	42	0	0	0	NA	NA	NA
P-0010825	Wild	Male	8	0:LIVING	31-50	Anti-PD-1/PD-L1	P-0010825-T01-IM5	Esophagogastric Cancer	Primary	42	0	8	0	NA	NA	NA
P-0002465	Wild	Male	4	1:DECEASED	31-50	Anti-PD-1/PD-L1+CTLA-4	P-0002465-T01-IM3	Esophagogastric Cancer	Metastasis	43	12.2007	4	1	NA	1	PD
P-0003521	Wild	Male	1	1:DECEASED	31-50	Anti-PD-1/PD-L1	P-0003521-T02-IM5	Esophagogastric Cancer	Primary	43	6.85104	1	1	NA	NA	NA
P-0025471	Wild	Male	2	0:LIVING	31-50	Anti-PD-1/PD-L1	P-0025471-T01-IM6	Esophagogastric Cancer	Metastasis	43	3.45879	2	0	NA	NA	NA
P-0000121	Wild	Male	4	0:LIVING	31-50	Anti-PD-1/PD-L1	P-0000121-T01-IM3	Esophagogastric Cancer	Primary	44	3.32747	4	0	NA	1	PD
P-0019916	Wild	Female	2	0:LIVING	31-50	Anti-PD-1/PD-L1+CTLA-4	P-0019916-T01-IM6	Esophagogastric Cancer	Primary	44	3.45879	2	0	NA	NA	NA
P-0007748	Wild	Male	2	1:DECEASED	31-50	Anti-PD-1/PD-L1+CTLA-4	P-0007748-T01-IM5	Esophagogastric Cancer	Metastasis	45	1.95744	2	1	NA	1	PD
P-0015331	Wild	Male	1	1:DECEASED	31-50	Anti-PD-1/PD-L1+CTLA-4	P-0015331-T01-IM6	Esophagogastric Cancer	Primary	46	17.294	1	1	NA	NA	NA
P-0000103	Wild	Male	18	1:DECEASED	31-50	Anti-PD-1/PD-L1+CTLA-4	P-0000103-T01-IM3	Esophagogastric Cancer	Metastasis	47	6.65493	18	1	NA	1	PD
P-0019272	Wild	Female	12	0:LIVING	31-50	Anti-PD-1/PD-L1	P-0019272-T01-IM6	Esophagogastric Cancer	Primary	47	7.78228	12	0	NA	NA	NA
P-0025224	XMut	Male	4	0:LIVING	31-50	Anti-PD-1/PD-L1	P-0025224-T01-IM6	Esophagogastric Cancer	Primary	48	12.9705	4	0	NA	NA	NA
P-0003559	Wild	Female	5	0:LIVING	31-50	Anti-PD-1/PD-L1+CTLA-4	P-0003559-T01-IM5	Esophagogastric Cancer	Primary	48	0	5	0	NA	NA	NA
P-0019691	Wild	Male	8	0:LIVING	31-50	Anti-PD-1/PD-L1	P-0019691-T01-IM6	Esophagogastric Cancer	Metastasis	48	26.8056	8	0	NA	NA	NA
P-0020226	Wild	Male	9	0:LIVING	31-50	Anti-PD-1/PD-L1	P-0020226-T01-IM6	Esophagogastric Cancer	Primary	48	0.864698	9	0	NA	NA	NA
P-0004552	Wild	Male	9	1:DECEASED	31-50	Anti-PD-1/PD-L1+CTLA-4	P-0004552-T01-IM5	Esophagogastric Cancer	Metastasis	49	1.95744	9	1	NA	1	PR
P-0018800	Wild	Male	3	0:LIVING	31-50	Anti-PD-1/PD-L1+CTLA-4	P-0018800-T01-IM6	Esophagogastric Cancer	Primary	49	8.64698	3	0	NA	NA	NA
P-0001543	Wild	Male	15	1:DECEASED	31-50	Anti-PD-1/PD-L1+CTLA-4	P-0001543-T01-IM3	Esophagogastric Cancer	Primary	50	4.43662	15	1	NA	1	PD
P-0024270	Wild	Male	2	0:LIVING	31-50	Anti-PD-1/PD-L1+CTLA-4	P-0024270-T01-IM6	Esophagogastric Cancer	Primary	50	4.32349	2	0	NA	NA	NA
P-0000553	Wild	Male	8	1:DECEASED	50-60	Anti-PD-1/PD-L1+CTLA-4	P-0000553-T01-IM3	Esophagogastric Cancer	Metastasis	51	6.65493	8	1	NA	1	PD
P-0009066	Wild	Male	5	1:DECEASED	50-60	Anti-PD-1/PD-L1	P-0009066-T01-IM5	Esophagogastric Cancer	Primary	51	9.7872	5	1	NA	NA	NA
P-0000369	Wild	Female	17	1:DECEASED	50-60	Anti-PD-1/PD-L1+CTLA-4	P-0000369-T01-IM3	Esophagogastric Cancer	Primary	52	1.10916	17	1	NA	1	PD
P-0009368	Wild	Male	38	0:LIVING	31-50	Anti-PD-1/PD-L1+CTLA-4	P-0009368-T01-IM5	Esophagogastric Cancer	Primary	52	1.95744	38	0	NA	0	CR
P-0000793	Wild	Male	5	1:DECEASED	50-60	Anti-PD-1/PD-L1	P-0000793-T02-IM5	Esophagogastric Cancer	Metastasis	54	3.91488	5	1	NA	1	PD
P-0007995	Wild	Female	35	0:LIVING	50-60	Anti-PD-1/PD-L1	P-0007995-T01-IM5	Esophagogastric Cancer	Metastasis	54	29.3616	35	0	NA	1	CR
P-0022788	Wild	Male	4	0:LIVING	50-60	Anti-PD-1/PD-L1+CTLA-4	P-0022788-T01-IM6	Esophagogastric Cancer	Metastasis	54	8.64698	4	0	NA	NA	NA
P-0023627	Wild	Male	8	0:LIVING	50-60	Anti-PD-1/PD-L1	P-0023627-T01-IM6	Esophagogastric Cancer	Primary	54	0	8	0	NA	NA	NA
P-0004016	Wild	Male	3	1:DECEASED	50-60	Anti-PD-1/PD-L1	P-0004016-T01-IM5	Esophagogastric Cancer	Primary	55	5.87232	3	1	NA	NA	NA
P-0022952	Wild	Male	9	0:LIVING	50-60	Anti-PD-1/PD-L1	P-0022952-T01-IM6	Esophagogastric Cancer	Primary	55	6.91758	9	0	NA	NA	NA
P-0024243	XMut	Female	2	0:LIVING	50-60	Anti-PD-1/PD-L1	P-0024243-T01-IM6	Esophagogastric Cancer	Primary	56	42.3702	2	0	NA	NA	NA
P-0001495	Wild	Male	17	1:DECEASED	50-60	Anti-PD-1/PD-L1	P-0001495-T01-IM3	Esophagogastric Cancer	Primary	56	6.65493	17	1	NA	1	PD
P-0009088	Wild	Male	2	1:DECEASED	50-60	Anti-PD-1/PD-L1	P-0009088-T01-IM5	Esophagogastric Cancer	Primary	56	4.8936	2	1	NA	NA	NA
P-0009100	Wild	Male	2	1:DECEASED	50-60	Anti-PD-1/PD-L1	P-0009100-T01-IM5	Esophagogastric Cancer	Primary	56	2.93616	2	1	NA	1	PD
P-0016311	Wild	Male	23	0:LIVING	50-60	Anti-PD-1/PD-L1	P-0016311-T01-IM6	Esophagogastric Cancer	Primary	56	3.45879	23	0	NA	1	PR
P-0020903	Wild	Male	8	0:LIVING	50-60	Anti-PD-1/PD-L1	P-0020903-T01-IM6	Esophagogastric Cancer	Metastasis	56	6.05289	8	0	NA	NA	NA
P-0023553	Wild	Male	10	0:LIVING	50-60	Anti-PD-1/PD-L1	P-0023553-T01-IM6	Esophagogastric Cancer	Primary	56	9.51168	10	0	NA	NA	NA
P-0009563	Wild	Male	1	1:DECEASED	50-60	Anti-PD-1/PD-L1	P-0009563-T01-IM5	Esophagogastric Cancer	Primary	57	8.80848	1	1	NA	NA	NA
P-0024527	Wild	Male	7	0:LIVING	50-60	Anti-PD-1/PD-L1+CTLA-4	P-0024527-T01-IM6	Esophagogastric Cancer	Metastasis	57	2.59409	7	0	NA	NA	NA
P-0001586	Wild	Male	11	0:LIVING	50-60	Anti-PD-1/PD-L1	P-0001586-T02-IM5	Esophagogastric Cancer	Metastasis	58	5.87232	11	0	NA	NA	NA
P-0005488	Wild	Male	21	1:DECEASED	50-60	Anti-PD-1/PD-L1	P-0005488-T01-IM5	Esophagogastric Cancer	Primary	58	10.7659	21	1	NA	1	PD
P-0001298	Wild	Male	9	1:DECEASED	61-70	Anti-PD-1/PD-L1	P-0001298-T01-IM3	Esophagogastric Cancer	Primary	59	5.54578	9	1	NA	1	PD
P-0007118	Wild	Female	1	0:LIVING	50-60	Anti-PD-1/PD-L1	P-0007118-T01-IM5	Esophagogastric Cancer	Primary	59	6.85104	1	0	NA	NA	NA
P-0007845	Wild	Male	4	0:LIVING	50-60	Anti-PD-1/PD-L1	P-0007845-T01-IM5	Esophagogastric Cancer	Primary	59	1.95744	4	0	NA	NA	NA
P-0020169	Wild	Male	4	1:DECEASED	50-60	Anti-PD-1/PD-L1	P-0020169-T01-IM6	Esophagogastric Cancer	Primary	59	6.05289	4	1	NA	NA	NA
P-0022688	Wild	Male	6	0:LIVING	50-60	Anti-PD-1/PD-L1	P-0022688-T01-IM6	Esophagogastric Cancer	Primary	59	3.45879	6	0	NA	NA	NA
P-0023194	Wild	Male	5	0:LIVING	50-60	Anti-PD-1/PD-L1	P-0023194-T01-IM6	Esophagogastric Cancer	Primary	59	2.59409	5	0	NA	NA	NA
P-0019754	Wild	Male	10	0:LIVING	50-60	Anti-PD-1/PD-L1	P-0019754-T01-IM6	Esophagogastric Cancer	Primary	60	5.18819	10	0	NA	NA	NA
P-0024205	Wild	Male	3	0:LIVING	50-60	Anti-PD-1/PD-L1	P-0024205-T01-IM6	Esophagogastric Cancer	Primary	60	6.91758	3	0	NA	NA	NA
P-0024419	Wild	Male	4	0:LIVING	50-60	Anti-PD-1/PD-L1	P-0024419-T01-IM6	Esophagogastric Cancer	Metastasis	60	0	4	0	NA	NA	NA
P-0000249	Wild	Male	3	1:DECEASED	61-70	Anti-PD-1/PD-L1	P-0000249-T02-IM3	Esophagogastric Cancer	Primary	61	1.10916	3	1	NA	1	PD
P-0000444	Wild	Male	2	1:DECEASED	61-70	Anti-PD-1/PD-L1	P-0000444-T01-IM3	Esophagogastric Cancer	Metastasis	61	5.54578	2	1	NA	NA	NA
P-0016931	Wild	Male	1	0:LIVING	50-60	Anti-PD-1/PD-L1+CTLA-4	P-0016931-T01-IM6	Esophagogastric Cancer	Metastasis	61	6.05289	1	0	NA	NA	NA
P-0003914	Wild	Male	1	1:DECEASED	61-70	Anti-PD-1/PD-L1	P-0003914-T01-IM3	Esophagogastric Cancer	Primary	62	9.9824	1	1	NA	1	PD
P-0005500	Wild	Male	1	1:DECEASED	61-70	Anti-CTLA-4	P-0005500-T01-IM5	Esophagogastric Cancer	Primary	62	24.468	1	1	NA	NA	NA
P-0018782	Wild	Male	10	0:LIVING	61-70	Anti-PD-1/PD-L1+CTLA-4	P-0018782-T01-IM6	Esophagogastric Cancer	Primary	62	1.7294	10	0	NA	NA	NA
P-0019351	Wild	Male	10	0:LIVING	61-70	Anti-PD-1/PD-L1	P-0019351-T01-IM6	Esophagogastric Cancer	Primary	62	5.18819	10	0	NA	NA	NA
P-0019413	Wild	Male	2	0:LIVING	61-70	Anti-PD-1/PD-L1	P-0019413-T01-IM6	Esophagogastric Cancer	Primary	62	6.91758	2	0	NA	NA	NA
P-0022995	Wild	Male	7	1:DECEASED	61-70	Anti-PD-1/PD-L1	P-0022995-T01-IM6	Esophagogastric Cancer	Primary	62	5.18819	7	1	NA	NA	NA
P-0023603	Wild	Male	3	1:DECEASED	61-70	Anti-PD-1/PD-L1	P-0023603-T01-IM6	Esophagogastric Cancer	Primary	62	7.78228	3	1	NA	NA	NA
P-0018683	Wild	Female	9	0:LIVING	61-70	Anti-PD-1/PD-L1	P-0018683-T01-IM6	Esophagogastric Cancer	Primary	63	6.05289	9	0	NA	NA	NA
P-0001855	Wild	Male	9	0:LIVING	61-70	Anti-PD-1/PD-L1+CTLA-4	P-0001855-T01-IM3	Esophagogastric Cancer	Metastasis	64	4.43662	9	0	NA	NA	NA
P-0017370	Wild	Male	6	0:LIVING	61-70	Anti-PD-1/PD-L1	P-0017370-T01-IM6	Esophagogastric Cancer	Primary	64	37.182	6	0	NA	NA	NA
P-0021993	Wild	Female	5	0:LIVING	61-70	Anti-PD-1/PD-L1	P-0021993-T01-IM6	Esophagogastric Cancer	Primary	64	4.32349	5	0	NA	NA	NA
P-0024530	Wild	Male	4	0:LIVING	61-70	Anti-PD-1/PD-L1	P-0024530-T01-IM6	Esophagogastric Cancer	Primary	64	6.05289	4	0	NA	NA	NA
P-0000977	Wild	Male	2	1:DECEASED	61-70	Anti-PD-1/PD-L1+CTLA-4	P-0000977-T01-IM3	Esophagogastric Cancer	Primary	65	7.76409	2	1	NA	1	PD
P-0018568	Wild	Female	12	0:LIVING	61-70	Anti-PD-1/PD-L1	P-0018568-T01-IM6	Esophagogastric Cancer	Metastasis	65	5.18819	12	0	NA	NA	NA
P-0006026	Wild	Male	12	0:LIVING	61-70	Anti-PD-1/PD-L1	P-0006026-T01-IM5	Esophagogastric Cancer	Metastasis	66	6.85104	12	0	NA	1	PD
P-0008187	Wild	Male	11	0:LIVING	61-70	Anti-PD-1/PD-L1	P-0008187-T01-IM5	Esophagogastric Cancer	Primary	66	5.87232	11	0	NA	NA	NA
P-0015251	Wild	Male	6	1:DECEASED	61-70	Anti-PD-1/PD-L1+CTLA-4	P-0015251-T01-IM6	Esophagogastric Cancer	Metastasis	66	8.64698	6	1	NA	NA	NA
P-0020109	Wild	Male	3	1:DECEASED	61-70	Anti-PD-1/PD-L1	P-0020109-T01-IM6	Esophagogastric Cancer	Primary	66	6.05289	3	1	NA	NA	NA
P-0024054	Wild	Male	4	0:LIVING	61-70	Anti-PD-1/PD-L1	P-0024054-T01-IM6	Esophagogastric Cancer	Metastasis	67	8.64698	4	0	NA	NA	NA
P-0010317	Wild	Male	9	1:DECEASED	61-70	Anti-PD-1/PD-L1	P-0010317-T01-IM5	Esophagogastric Cancer	Primary	68	2.93616	9	1	NA	1	PD
P-0018927	Wild	Female	13	0:LIVING	61-70	Anti-PD-1/PD-L1+CTLA-4	P-0018927-T01-IM6	Esophagogastric Cancer	Metastasis	68	6.91758	13	0	NA	NA	NA
P-0022847	Wild	Male	5	1:DECEASED	61-70	Anti-PD-1/PD-L1	P-0022847-T01-IM6	Esophagogastric Cancer	Metastasis	68	5.18819	5	1	NA	NA	NA
P-0003650	Wild	Male	9	0:LIVING	>71	Anti-PD-1/PD-L1	P-0003650-T01-IM5	Esophagogastric Cancer	Primary	69	61.6593	9	0	NA	0	CR
P-0000938	Wild	Male	13	1:DECEASED	>71	Anti-PD-1/PD-L1+CTLA-4	P-0000938-T01-IM3	Esophagogastric Cancer	Primary	70	3.32747	13	1	NA	1	PD
P-0001733	Wild	Male	13	0:LIVING	>71	Anti-PD-1/PD-L1+CTLA-4	P-0001733-T01-IM3	Esophagogastric Cancer	Primary	70	4.43662	13	0	NA	0	PR
P-0003432	Wild	Male	4	1:DECEASED	61-70	Anti-PD-1/PD-L1	P-0003432-T01-IM5	Esophagogastric Cancer	Metastasis	70	5.87232	4	1	NA	1	PD
P-0006414	Wild	Female	19	0:LIVING	61-70	Anti-PD-1/PD-L1	P-0006414-T01-IM5	Esophagogastric Cancer	Primary	70	6.85104	19	0	NA	NA	NA
P-0006869	Wild	Male	4	1:DECEASED	>71	Anti-PD-1/PD-L1	P-0006869-T01-IM5	Esophagogastric Cancer	Metastasis	70	1.95744	4	1	NA	1	PD
P-0008004	Wild	Female	4	1:DECEASED	61-70	Anti-PD-1/PD-L1	P-0008004-T01-IM5	Esophagogastric Cancer	Metastasis	70	1.95744	4	1	NA	1	PD
P-0013314	Wild	Female	20	1:DECEASED	61-70	Anti-PD-1/PD-L1	P-0013314-T01-IM5	Esophagogastric Cancer	Metastasis	70	0.97872	20	1	NA	NA	NA
P-0018143	Wild	Female	0	1:DECEASED	61-70	Anti-PD-1/PD-L1	P-0018143-T01-IM6	Esophagogastric Cancer	Primary	70	5.18819	0	1	NA	NA	NA
P-0019657	Wild	Male	3	1:DECEASED	61-70	Anti-PD-1/PD-L1	P-0019657-T01-IM6	Esophagogastric Cancer	Metastasis	70	5.18819	3	1	NA	NA	NA
P-0020175	Wild	Male	8	0:LIVING	61-70	Anti-PD-1/PD-L1	P-0020175-T01-IM6	Esophagogastric Cancer	Primary	70	4.32349	8	0	NA	NA	NA
P-0024068	Wild	Female	1	0:LIVING	61-70	Anti-PD-1/PD-L1	P-0024068-T01-IM6	Esophagogastric Cancer	Metastasis	70	31.9938	1	0	NA	NA	NA
P-0001850	Wild	Male	17	0:LIVING	>71	Anti-PD-1/PD-L1	P-0001850-T01-IM3	Esophagogastric Cancer	Primary	71	1.10916	17	0	NA	1	SD
P-0003944	Wild	Male	21	1:DECEASED	61-70	Anti-CTLA-4	P-0003944-T01-IM3	Esophagogastric Cancer	Primary	71	5.54578	21	1	NA	1	PD
P-0009057	Wild	Female	10	1:DECEASED	61-70	Anti-PD-1/PD-L1	P-0009057-T01-IM5	Esophagogastric Cancer	Metastasis	71	42.0849	10	1	NA	1	SD
P-0010501	Wild	Male	4	1:DECEASED	>71	Anti-PD-1/PD-L1	P-0010501-T01-IM5	Esophagogastric Cancer	Metastasis	71	9.7872	4	1	NA	1	PD
P-0018340	Wild	Male	12	0:LIVING	61-70	Anti-PD-1/PD-L1	P-0018340-T01-IM6	Esophagogastric Cancer	Primary	71	4.32349	12	0	NA	NA	NA
P-0018771	Wild	Male	13	0:LIVING	61-70	Anti-PD-1/PD-L1	P-0018771-T02-IM6	Esophagogastric Cancer	Primary	71	8.64698	13	0	NA	NA	NA
P-0022510	Wild	Male	6	1:DECEASED	61-70	Anti-PD-1/PD-L1	P-0022510-T01-IM6	Esophagogastric Cancer	Primary	71	5.18819	6	1	NA	NA	NA
P-0009337	XMut	Male	1	1:DECEASED	>71	Anti-PD-1/PD-L1	P-0009337-T01-IM5	Esophagogastric Cancer	Primary	72	3.91488	1	1	NA	1	PD
P-0008188	Wild	Female	5	1:DECEASED	>71	Anti-PD-1/PD-L1	P-0008188-T01-IM5	Esophagogastric Cancer	Primary	72	46.9785	5	1	NA	1	PD
P-0021403	Wild	Male	1	0:LIVING	>71	Anti-PD-1/PD-L1+CTLA-4	P-0021403-T01-IM6	Esophagogastric Cancer	Metastasis	72	6.05289	1	0	NA	NA	NA
P-0003892	Wild	Female	2	0:LIVING	>71	Anti-PD-1/PD-L1+CTLA-4	P-0003892-T01-IM5	Esophagogastric Cancer	Metastasis	73	2.93616	2	0	NA	NA	NA
P-0018371	Wild	Male	13	0:LIVING	>71	Anti-PD-1/PD-L1	P-0018371-T01-IM6	Esophagogastric Cancer	Metastasis	73	4.32349	13	0	NA	NA	NA
P-0018986	Wild	Female	12	0:LIVING	>71	Anti-PD-1/PD-L1	P-0018986-T01-IM6	Esophagogastric Cancer	Primary	73	10.3764	12	0	NA	NA	NA
P-0025146	Wild	Male	5	0:LIVING	>71	Anti-PD-1/PD-L1	P-0025146-T01-IM6	Esophagogastric Cancer	Primary	73	0.864698	5	0	NA	NA	NA
P-0025394	Wild	Male	2	0:LIVING	>71	Anti-PD-1/PD-L1+CTLA-4	P-0025394-T01-IM6	Esophagogastric Cancer	Primary	73	6.91758	2	0	NA	NA	NA
P-0026250	Wild	Female	3	0:LIVING	>71	Anti-PD-1/PD-L1	P-0026250-T01-IM6	Esophagogastric Cancer	Metastasis	74	3.45879	3	0	NA	NA	NA
P-0003543	Wild	Male	2	1:DECEASED	>71	Anti-PD-1/PD-L1	P-0003543-T01-IM5	Esophagogastric Cancer	Metastasis	75	2.93616	2	1	NA	NA	NA
P-0026114	Wild	Female	2	0:LIVING	>71	Anti-PD-1/PD-L1	P-0026114-T01-IM6	Esophagogastric Cancer	Primary	75	4.32349	2	0	NA	NA	NA
P-0022154	Wild	Male	7	0:LIVING	>71	Anti-PD-1/PD-L1	P-0022154-T01-IM6	Esophagogastric Cancer	Primary	76	2.59409	7	0	NA	NA	NA
P-0004043	Wild	Male	4	1:DECEASED	>71	Anti-PD-1/PD-L1	P-0004043-T01-IM3	Esophagogastric Cancer	Primary	77	5.54578	4	1	NA	1	PD
P-0006077	Wild	Female	1	1:DECEASED	>71	Anti-PD-1/PD-L1	P-0006077-T01-IM5	Esophagogastric Cancer	Metastasis	77	4.8936	1	1	NA	NA	NA
P-0007674	Wild	Male	7	1:DECEASED	>71	Anti-PD-1/PD-L1	P-0007674-T01-IM5	Esophagogastric Cancer	Primary	77	0	7	1	NA	NA	NA
P-0000062	Wild	Male	1	1:DECEASED	>71	Anti-PD-1/PD-L1	P-0000062-T01-IM3	Esophagogastric Cancer	Primary	80	6.65493	1	1	NA	1	PD
P-0016233	Wild	Male	3	1:DECEASED	>71	Anti-PD-1/PD-L1	P-0016233-T01-IM6	Esophagogastric Cancer	Primary	82	4.32349	3	1	NA	NA	NA
P-0023963	Wild	Female	2	0:LIVING	>71	Anti-PD-1/PD-L1	P-0023963-T01-IM6	Esophagogastric Cancer	Metastasis	82	24.2115	2	0	NA	NA	NA
P-0009918	Wild	Male	23	0:LIVING	>71	Anti-PD-1/PD-L1	P-0009918-T01-IM5	Esophagogastric Cancer	Primary	87	61.6593	23	0	NA	0	CR
P-0003319	Wild	Male	4	1:DECEASED	<30	Anti-PD-1/PD-L1	P-0003319-T01-IM5	Glioma	Primary	15	0.97872	4	1	NA	NA	NA
P-0005963	Wild	Male	3	1:DECEASED	<30	Anti-PD-1/PD-L1	P-0005963-T01-IM5	Glioma	Primary	15	1.95744	3	1	NA	NA	NA
P-0001591	Wild	Male	15	1:DECEASED	<30	Anti-PD-1/PD-L1	P-0001591-T01-IM3	Glioma	Primary	17	2.21831	15	1	NA	NA	NA
P-0007010	Wild	Male	5	1:DECEASED	<30	Anti-PD-1/PD-L1	P-0007010-T01-IM5	Glioma	Primary	17	0.97872	5	1	NA	NA	NA
P-0002620	Wild	Male	11	1:DECEASED	<30	Anti-PD-1/PD-L1	P-0002620-T01-IM3	Glioma	Primary	19	6.65493	11	1	NA	NA	NA
P-0006428	Wild	Female	2	1:DECEASED	<30	Anti-PD-1/PD-L1	P-0006428-T01-IM5	Glioma	Primary	21	6.85104	2	1	NA	NA	NA
P-0015289	Wild	Male	16	0:LIVING	<30	Anti-PD-1/PD-L1	P-0015289-T01-IM6	Glioma	Primary	23	2.59409	16	0	NA	NA	NA
P-0006545	Wild	Male	4	1:DECEASED	<30	Anti-PD-1/PD-L1	P-0006545-T01-IM5	Glioma	Primary	25	4.8936	4	1	NA	NA	NA
P-0016048	Wild	Female	12	1:DECEASED	<30	Anti-PD-1/PD-L1	P-0016048-T01-IM6	Glioma	Primary	25	4.32349	12	1	NA	NA	NA
P-0001731	Wild	Male	31	1:DECEASED	<30	Anti-PD-1/PD-L1	P-0001731-T01-IM3	Glioma	Primary	26	5.54578	31	1	NA	NA	NA
P-0000749	Wild	Male	13	0:LIVING	<30	Anti-PD-1/PD-L1	P-0000749-T01-IM3	Glioma	Primary	28	8.87324	13	0	NA	NA	NA
P-0000223	Wild	Female	2	1:DECEASED	<30	Anti-PD-1/PD-L1	P-0000223-T01-IM3	Glioma	Primary	29	5.54578	2	1	NA	NA	NA
P-0006546	Wild	Male	32	0:LIVING	<30	Anti-PD-1/PD-L1	P-0006546-T01-IM5	Glioma	Primary	29	6.85104	32	0	NA	NA	NA
P-0000818	Wild	Male	14	1:DECEASED	31-50	Anti-PD-1/PD-L1	P-0000818-T01-IM3	Glioma	Primary	33	4.43662	14	1	NA	NA	NA
P-0002386	Wild	Female	12	1:DECEASED	31-50	Anti-PD-1/PD-L1	P-0002386-T01-IM3	Glioma	Primary	33	5.54578	12	1	NA	NA	NA
P-0004256	Wild	Male	7	1:DECEASED	31-50	Anti-PD-1/PD-L1	P-0004256-T01-IM5	Glioma	Primary	33	3.91488	7	1	NA	NA	NA
P-0001400	Wild	Female	3	1:DECEASED	31-50	Anti-PD-1/PD-L1	P-0001400-T01-IM3	Glioma	Primary	34	5.54578	3	1	NA	NA	NA
P-0004857	Wild	Male	33	0:LIVING	31-50	Anti-PD-1/PD-L1	P-0004857-T01-IM5	Glioma	Primary	35	3.91488	33	0	NA	NA	NA
P-0008382	Wild	Male	0	1:DECEASED	31-50	Anti-PD-1/PD-L1	P-0008382-T01-IM5	Glioma	Primary	35	8.80848	0	1	NA	NA	NA
P-0009499	Wild	Male	5	1:DECEASED	31-50	Anti-PD-1/PD-L1	P-0009499-T01-IM5	Glioma	Primary	36	50.8934	5	1	NA	NA	NA
P-0007124	Wild	Male	2	1:DECEASED	31-50	Anti-PD-1/PD-L1	P-0007124-T01-IM5	Glioma	Primary	41	4.8936	2	1	NA	NA	NA
P-0002647	Wild	Male	4	1:DECEASED	31-50	Anti-PD-1/PD-L1	P-0002647-T01-IM3	Glioma	Primary	42	3.32747	4	1	NA	NA	NA
P-0007314	Wild	Male	9	1:DECEASED	31-50	Anti-PD-1/PD-L1	P-0007314-T01-IM5	Glioma	Primary	42	0	9	1	NA	NA	NA
P-0010516	Wild	Female	22	0:LIVING	31-50	Anti-PD-1/PD-L1	P-0010516-T01-IM5	Glioma	Primary	42	2.93616	22	0	NA	NA	NA
P-0013029	Wild	Male	3	1:DECEASED	31-50	Anti-PD-1/PD-L1	P-0013029-T01-IM5	Glioma	Primary	42	30.3403	3	1	NA	NA	NA
P-0004812	Wild	Male	21	0:LIVING	31-50	Anti-PD-1/PD-L1	P-0004812-T01-IM5	Glioma	Primary	43	2.93616	21	0	NA	NA	NA
P-0002015	Wild	Female	8	1:DECEASED	31-50	Anti-PD-1/PD-L1	P-0002015-T01-IM3	Glioma	Primary	44	1.10916	8	1	NA	NA	NA
P-0003456	Wild	Female	9	1:DECEASED	31-50	Anti-PD-1/PD-L1	P-0003456-T01-IM5	Glioma	Primary	45	2.93616	9	1	NA	NA	NA
P-0004778	Wild	Male	16	1:DECEASED	31-50	Anti-PD-1/PD-L1	P-0004778-T01-IM5	Glioma	Primary	45	0.97872	16	1	NA	NA	NA
P-0004971	Wild	Male	17	1:DECEASED	31-50	Anti-PD-1/PD-L1	P-0004971-T01-IM5	Glioma	Primary	45	3.91488	17	1	NA	NA	NA
P-0006672	Wild	Male	7	1:DECEASED	31-50	Anti-PD-1/PD-L1	P-0006672-T01-IM5	Glioma	Primary	45	4.8936	7	1	NA	NA	NA
P-0008380	Wild	Male	10	1:DECEASED	31-50	Anti-PD-1/PD-L1	P-0008380-T01-IM5	Glioma	Primary	45	1.95744	10	1	NA	NA	NA
P-0010004	Wild	Female	9	1:DECEASED	31-50	Anti-PD-1/PD-L1	P-0010004-T01-IM5	Glioma	Primary	45	2.93616	9	1	NA	NA	NA
P-0015346	Wild	Female	8	0:LIVING	31-50	Anti-PD-1/PD-L1	P-0015346-T01-IM6	Glioma	Primary	45	1.7294	8	0	NA	NA	NA
P-0005635	Wild	Female	1	0:LIVING	31-50	Anti-PD-1/PD-L1	P-0005635-T01-IM5	Glioma	Primary	46	5.87232	1	0	NA	NA	NA
P-0004259	Wild	Male	2	1:DECEASED	31-50	Anti-PD-1/PD-L1	P-0004259-T01-IM5	Glioma	Primary	47	5.87232	2	1	NA	NA	NA
P-0013243	Wild	Female	8	1:DECEASED	31-50	Anti-PD-1/PD-L1	P-0013243-T01-IM5	Glioma	Primary	47	4.8936	8	1	NA	NA	NA
P-0013259	Wild	Female	13	1:DECEASED	31-50	Anti-PD-1/PD-L1	P-0013259-T01-IM5	Glioma	Primary	47	2.93616	13	1	NA	NA	NA
P-0002181	Wild	Male	9	1:DECEASED	31-50	Anti-PD-1/PD-L1	P-0002181-T01-IM3	Glioma	Primary	48	2.21831	9	1	NA	NA	NA
P-0003598	Wild	Female	6	1:DECEASED	31-50	Anti-PD-1/PD-L1	P-0003598-T01-IM5	Glioma	Primary	48	0.97872	6	1	NA	NA	NA
P-0006970	Wild	Male	12	1:DECEASED	31-50	Anti-PD-1/PD-L1	P-0006970-T01-IM5	Glioma	Primary	48	4.8936	12	1	NA	NA	NA
P-0002633	Wild	Male	21	1:DECEASED	31-50	Anti-PD-1/PD-L1+CTLA-4	P-0002633-T01-IM3	Glioma	Primary	49	22.1831	21	1	NA	NA	NA
P-0003567	Wild	Male	12	1:DECEASED	31-50	Anti-PD-1/PD-L1	P-0003567-T01-IM5	Glioma	Primary	50	2.93616	12	1	NA	NA	NA
P-0005539	Wild	Female	8	1:DECEASED	50-60	Anti-PD-1/PD-L1	P-0005539-T01-IM5	Glioma	Primary	50	1.95744	8	1	NA	NA	NA
P-0007504	Wild	Male	16	1:DECEASED	31-50	Anti-PD-1/PD-L1	P-0007504-T01-IM5	Glioma	Primary	50	1.95744	16	1	NA	NA	NA
P-0010556	Wild	Male	15	1:DECEASED	31-50	Anti-PD-1/PD-L1	P-0010556-T01-IM5	Glioma	Primary	50	0.97872	15	1	NA	NA	NA
P-0013544	Wild	Male	13	1:DECEASED	31-50	Anti-PD-1/PD-L1	P-0013544-T02-IM6	Glioma	Metastasis	50	3.45879	13	1	NA	NA	NA
P-0014677	Wild	Male	17	0:LIVING	31-50	Anti-PD-1/PD-L1	P-0014677-T01-IM6	Glioma	Primary	50	1.7294	17	0	NA	NA	NA
P-0002981	Wild	Female	12	1:DECEASED	50-60	Anti-PD-1/PD-L1	P-0002981-T01-IM3	Glioma	Primary	51	0	12	1	NA	NA	NA
P-0013360	Wild	Male	13	0:LIVING	50-60	Anti-PD-1/PD-L1	P-0013360-T01-IM5	Glioma	Primary	51	4.8936	13	0	NA	NA	NA
P-0000758	Wild	Male	14	1:DECEASED	50-60	Anti-PD-1/PD-L1	P-0000758-T01-IM3	Glioma	Primary	52	3.32747	14	1	NA	NA	NA
P-0009411	Wild	Female	21	1:DECEASED	50-60	Anti-PD-1/PD-L1	P-0009411-T01-IM5	Glioma	Primary	52	61.6593	21	1	NA	NA	NA
P-0010344	Wild	Male	2	1:DECEASED	50-60	Anti-PD-1/PD-L1	P-0010344-T01-IM5	Glioma	Primary	52	2.93616	2	1	NA	NA	NA
P-0010744	Wild	Female	5	0:LIVING	50-60	Anti-PD-1/PD-L1	P-0010744-T01-IM5	Glioma	Primary	52	98.8507	5	0	NA	NA	NA
P-0006848	Wild	Female	10	1:DECEASED	50-60	Anti-PD-1/PD-L1	P-0006848-T01-IM5	Glioma	Primary	53	5.87232	10	1	NA	NA	NA
P-0009365	Wild	Female	9	1:DECEASED	50-60	Anti-PD-1/PD-L1	P-0009365-T01-IM5	Glioma	Primary	53	3.91488	9	1	NA	NA	NA
P-0011401	Wild	Female	19	1:DECEASED	50-60	Anti-PD-1/PD-L1	P-0011401-T01-IM5	Glioma	Primary	53	2.93616	19	1	NA	NA	NA
P-0013603	Wild	Male	15	1:DECEASED	50-60	Anti-PD-1/PD-L1	P-0013603-T01-IM5	Glioma	Primary	53	1.95744	15	1	NA	NA	NA
P-0003783	Wild	Male	13	1:DECEASED	50-60	Anti-PD-1/PD-L1	P-0003783-T01-IM5	Glioma	Primary	54	1.95744	13	1	NA	NA	NA
P-0005361	Wild	Female	25	0:LIVING	50-60	Anti-PD-1/PD-L1	P-0005361-T01-IM5	Glioma	Primary	54	2.93616	25	0	NA	NA	NA
P-0016691	Wild	Male	13	0:LIVING	50-60	Anti-PD-1/PD-L1	P-0016691-T01-IM6	Glioma	Primary	54	0.864698	13	0	NA	NA	NA
P-0001408	Wild	Male	4	0:LIVING	50-60	Anti-PD-1/PD-L1+CTLA-4	P-0001408-T01-IM3	Glioma	Primary	55	3.32747	4	0	NA	NA	NA
P-0001882	Wild	Male	23	0:LIVING	50-60	Anti-PD-1/PD-L1	P-0001882-T01-IM3	Glioma	Primary	55	34.3838	23	0	NA	NA	NA
P-0002836	Wild	Female	1	1:DECEASED	50-60	Anti-PD-1/PD-L1	P-0002836-T01-IM3	Glioma	Primary	55	4.43662	1	1	NA	NA	NA
P-0003865	Wild	Female	6	1:DECEASED	50-60	Anti-PD-1/PD-L1	P-0003865-T01-IM5	Glioma	Primary	55	6.85104	6	1	NA	NA	NA
P-0007693	Wild	Male	17	1:DECEASED	50-60	Anti-PD-1/PD-L1	P-0007693-T01-IM5	Glioma	Primary	55	5.87232	17	1	NA	NA	NA
P-0013347	Wild	Male	14	1:DECEASED	50-60	Anti-PD-1/PD-L1	P-0013347-T01-IM5	Glioma	Primary	55	5.87232	14	1	NA	NA	NA
P-0013938	Wild	Male	21	1:DECEASED	50-60	Anti-PD-1/PD-L1	P-0013938-T01-IM5	Glioma	Primary	55	0.97872	21	1	NA	NA	NA
P-0016256	Wild	Male	5	1:DECEASED	50-60	Anti-PD-1/PD-L1	P-0016256-T01-IM6	Glioma	Primary	55	3.45879	5	1	NA	NA	NA
P-0005141	Wild	Male	33	0:LIVING	50-60	Anti-PD-1/PD-L1	P-0005141-T01-IM5	Glioma	Primary	56	0.97872	33	0	NA	NA	NA
P-0005882	Wild	Male	5	1:DECEASED	50-60	Anti-PD-1/PD-L1	P-0005882-T01-IM5	Glioma	Primary	56	1.95744	5	1	NA	NA	NA
P-0005912	Wild	Male	29	1:DECEASED	50-60	Anti-PD-1/PD-L1	P-0005912-T01-IM5	Glioma	Primary	56	2.93616	29	1	NA	NA	NA
P-0001420	Wild	Female	4	1:DECEASED	50-60	Anti-PD-1/PD-L1	P-0001420-T01-IM3	Glioma	Primary	57	38.8204	4	1	NA	NA	NA
P-0002452	Wild	Female	6	1:DECEASED	50-60	Anti-PD-1/PD-L1	P-0002452-T01-IM3	Glioma	Primary	57	1.10916	6	1	NA	NA	NA
P-0005254	Wild	Female	5	1:DECEASED	50-60	Anti-PD-1/PD-L1	P-0005254-T01-IM5	Glioma	Primary	57	0.97872	5	1	NA	NA	NA
P-0006441	Wild	Male	8	1:DECEASED	50-60	Anti-PD-1/PD-L1	P-0006441-T01-IM5	Glioma	Primary	57	3.91488	8	1	NA	NA	NA
P-0006500	Wild	Male	5	1:DECEASED	50-60	Anti-PD-1/PD-L1	P-0006500-T01-IM5	Glioma	Primary	57	4.8936	5	1	NA	NA	NA
P-0008258	Wild	Female	2	1:DECEASED	50-60	Anti-PD-1/PD-L1	P-0008258-T01-IM5	Glioma	Primary	57	2.93616	2	1	NA	NA	NA
P-0013294	Wild	Female	4	1:DECEASED	50-60	Anti-PD-1/PD-L1	P-0013294-T01-IM5	Glioma	Primary	57	2.93616	4	1	NA	NA	NA
P-0013506	Wild	Female	8	0:LIVING	50-60	Anti-PD-1/PD-L1	P-0013506-T01-IM5	Glioma	Metastasis	57	55.787	8	0	NA	NA	NA
P-0016238	Wild	Male	23	0:LIVING	50-60	Anti-PD-1/PD-L1	P-0016238-T01-IM6	Glioma	Primary	57	1.7294	23	0	NA	NA	NA
P-0006667	Wild	Male	5	1:DECEASED	50-60	Anti-PD-1/PD-L1	P-0006667-T01-IM5	Glioma	Primary	58	2.93616	5	1	NA	NA	NA
P-0013380	Wild	Male	17	0:LIVING	50-60	Anti-PD-1/PD-L1	P-0013380-T01-IM5	Glioma	Primary	58	1.95744	17	0	NA	NA	NA
P-0003350	Wild	Male	16	1:DECEASED	50-60	Anti-PD-1/PD-L1	P-0003350-T01-IM5	Glioma	Primary	59	2.93616	16	1	NA	NA	NA
P-0015573	Wild	Male	8	0:LIVING	50-60	Anti-PD-1/PD-L1	P-0015573-T01-IM6	Glioma	Primary	59	51.0172	8	0	NA	NA	NA
P-0007917	Wild	Male	12	1:DECEASED	50-60	Anti-PD-1/PD-L1	P-0007917-T01-IM5	Glioma	Primary	60	2.93616	12	1	NA	NA	NA
P-0009711	Wild	Male	22	1:DECEASED	50-60	Anti-PD-1/PD-L1	P-0009711-T01-IM5	Glioma	Primary	60	2.93616	22	1	NA	NA	NA
P-0003360	Wild	Male	29	0:LIVING	61-70	Anti-PD-1/PD-L1+CTLA-4	P-0003360-T01-IM5	Glioma	Primary	62	2.93616	29	0	NA	NA	NA
P-0001052	Wild	Female	8	1:DECEASED	61-70	Anti-PD-1/PD-L1	P-0001052-T01-IM3	Glioma	Primary	63	3.32747	8	1	NA	NA	NA
P-0001843	Wild	Female	7	0:LIVING	61-70	Anti-PD-1/PD-L1	P-0001843-T01-IM3	Glioma	Primary	63	4.43662	7	0	NA	NA	NA
P-0013204	Wild	Male	15	0:LIVING	61-70	Anti-PD-1/PD-L1	P-0013204-T01-IM5	Glioma	Primary	63	2.93616	15	0	NA	NA	NA
P-0014006	Wild	Male	18	1:DECEASED	61-70	Anti-PD-1/PD-L1	P-0014006-T01-IM5	Glioma	Primary	63	0.97872	18	1	NA	NA	NA
P-0014220	Wild	Male	14	0:LIVING	61-70	Anti-PD-1/PD-L1	P-0014220-T01-IM6	Glioma	Primary	63	4.32349	14	0	NA	NA	NA
P-0015369	Wild	Male	0	0:LIVING	61-70	Anti-PD-1/PD-L1	P-0015369-T01-IM6	Glioma	Primary	63	0.864698	0	0	NA	NA	NA
P-0006045	Wild	Female	20	1:DECEASED	61-70	Anti-PD-1/PD-L1	P-0006045-T01-IM5	Glioma	Primary	64	1.95744	20	1	NA	NA	NA
P-0006416	Wild	Male	22	1:DECEASED	61-70	Anti-PD-1/PD-L1	P-0006416-T01-IM5	Glioma	Primary	64	1.95744	22	1	NA	NA	NA
P-0008166	Wild	Male	16	1:DECEASED	61-70	Anti-PD-1/PD-L1	P-0008166-T01-IM5	Glioma	Primary	64	2.93616	16	1	NA	NA	NA
P-0009453	Wild	Female	7	1:DECEASED	61-70	Anti-PD-1/PD-L1	P-0009453-T01-IM5	Glioma	Primary	64	2.93616	7	1	NA	NA	NA
P-0015603	Wild	Male	14	0:LIVING	61-70	Anti-PD-1/PD-L1	P-0015603-T01-IM6	Glioma	Primary	64	3.45879	14	0	NA	NA	NA
P-0001406	Wild	Female	3	1:DECEASED	61-70	Anti-PD-1/PD-L1	P-0001406-T01-IM3	Glioma	Primary	65	2.21831	3	1	NA	NA	NA
P-0008257	Wild	Male	10	1:DECEASED	61-70	Anti-PD-1/PD-L1	P-0008257-T01-IM5	Glioma	Primary	66	6.85104	10	1	NA	NA	NA
P-0011119	Wild	Female	20	1:DECEASED	61-70	Anti-PD-1/PD-L1	P-0011119-T01-IM5	Glioma	Primary	66	0.97872	20	1	NA	NA	NA
P-0014071	Wild	Male	6	1:DECEASED	61-70	Anti-PD-1/PD-L1	P-0014071-T01-IM5	Glioma	Primary	66	4.8936	6	1	NA	NA	NA
P-0009119	Wild	Male	18	1:DECEASED	61-70	Anti-PD-1/PD-L1	P-0009119-T01-IM5	Glioma	Primary	67	6.85104	18	1	NA	NA	NA
P-0011219	Wild	Male	13	1:DECEASED	61-70	Anti-PD-1/PD-L1	P-0011219-T01-IM5	Glioma	Primary	67	3.91488	13	1	NA	NA	NA
P-0002265	Wild	Male	21	0:LIVING	61-70	Anti-PD-1/PD-L1	P-0002265-T01-IM3	Glioma	Primary	68	1.10916	21	0	NA	NA	NA
P-0009451	Wild	Male	13	1:DECEASED	61-70	Anti-PD-1/PD-L1	P-0009451-T01-IM5	Glioma	Primary	69	4.8936	13	1	NA	NA	NA
P-0007104	Wild	Male	15	0:LIVING	61-70	Anti-PD-1/PD-L1	P-0007104-T01-IM5	Glioma	Primary	70	3.91488	15	0	NA	NA	NA
P-0009790	Wild	Male	16	1:DECEASED	61-70	Anti-PD-1/PD-L1	P-0009790-T01-IM5	Glioma	Primary	70	1.95744	16	1	NA	NA	NA
P-0013814	Wild	Male	15	0:LIVING	>71	Anti-PD-1/PD-L1	P-0013814-T01-IM5	Glioma	Primary	72	4.8936	15	0	NA	NA	NA
P-0005929	Wild	Female	15	1:DECEASED	>71	Anti-PD-1/PD-L1	P-0005929-T01-IM5	Glioma	Primary	74	5.87232	15	1	NA	NA	NA
P-0010380	Wild	Male	5	1:DECEASED	>71	Anti-PD-1/PD-L1	P-0010380-T01-IM5	Glioma	Primary	74	5.87232	5	1	NA	NA	NA
P-0010613	Wild	Female	3	0:LIVING	>71	Anti-PD-1/PD-L1	P-0010613-T01-IM5	Glioma	Primary	75	8.80848	3	0	NA	NA	NA
P-0001388	Wild	Male	16	1:DECEASED	>71	Anti-PD-1/PD-L1	P-0001388-T01-IM3	Glioma	Primary	77	5.54578	16	1	NA	NA	NA
P-0008939	Wild	Female	15	1:DECEASED	>71	Anti-PD-1/PD-L1	P-0008939-T01-IM5	Glioma	Primary	77	2.93616	15	1	NA	NA	NA
P-0014099	Wild	Female	6	1:DECEASED	>71	Anti-PD-1/PD-L1	P-0014099-T01-IM5	Glioma	Primary	77	2.93616	6	1	NA	NA	NA
P-0012687	Wild	Male	10	1:DECEASED	>71	Anti-PD-1/PD-L1	P-0012687-T01-IM5	Glioma	Primary	80	3.91488	10	1	NA	NA	NA
P-0004126	Wild	Female	14	0:LIVING	<30	Anti-PD-1/PD-L1	P-0004126-T01-IM5	Head and Neck Cancer	Metastasis	17	0	14	0	NA	NA	NA
P-0003272	Wild	Male	8	1:DECEASED	<30	Anti-PD-1/PD-L1	P-0003272-T01-IM5	Head and Neck Cancer	Metastasis	29	0.97872	8	1	NA	NA	NA
P-0019226	Wild	Male	9	0:LIVING	<30	Anti-PD-1/PD-L1	P-0019226-T01-IM6	Head and Neck Cancer	Metastasis	29	3.45879	9	0	NA	NA	NA
P-0007388	Wild	Female	15	1:DECEASED	<30	Anti-PD-1/PD-L1	P-0007388-T01-IM5	Head and Neck Cancer	Primary	31	10.7659	15	1	NA	NA	NA
P-0008328	Wild	Female	25	1:DECEASED	31-50	Anti-PD-1/PD-L1	P-0008328-T01-IM5	Head and Neck Cancer	Metastasis	34	10.7659	25	1	NA	NA	NA
P-0010104	Wild	Male	3	1:DECEASED	31-50	Anti-PD-1/PD-L1	P-0010104-T01-IM5	Head and Neck Cancer	Primary	34	4.8936	3	1	NA	NA	NA
P-0014465	Wild	Male	2	0:LIVING	31-50	Anti-PD-1/PD-L1	P-0014465-T01-IM6	Head and Neck Cancer	Metastasis	34	7.78228	2	0	NA	NA	NA
P-0002939	Wild	Male	10	1:DECEASED	31-50	Anti-PD-1/PD-L1	P-0002939-T01-IM3	Head and Neck Cancer	Primary	35	1.10916	10	1	NA	NA	NA
P-0009588	Wild	Male	8	1:DECEASED	31-50	Anti-PD-1/PD-L1	P-0009588-T01-IM5	Head and Neck Cancer	Metastasis	35	2.93616	8	1	NA	NA	NA
P-0001621	Wild	Female	0	1:DECEASED	31-50	Anti-PD-1/PD-L1+CTLA-4	P-0001621-T01-IM3	Head and Neck Cancer	Metastasis	37	2.21831	0	1	NA	NA	NA
P-0017769	Wild	Male	9	1:DECEASED	31-50	Anti-PD-1/PD-L1	P-0017769-T01-IM6	Head and Neck Cancer	Primary	39	6.05289	9	1	NA	NA	NA
P-0003059	Wild	Female	10	1:DECEASED	31-50	Anti-PD-1/PD-L1	P-0003059-T01-IM5	Head and Neck Cancer	Primary	40	1.95744	10	1	NA	NA	NA
P-0010241	XMut	Female	16	0:LIVING	31-50	Anti-PD-1/PD-L1	P-0010241-T01-IM5	Head and Neck Cancer	Metastasis	41	65.5742	16	0	NA	NA	NA
P-0008248	Wild	Male	2	1:DECEASED	31-50	Anti-PD-1/PD-L1	P-0008248-T01-IM5	Head and Neck Cancer	Primary	41	11.7446	2	1	NA	NA	NA
P-0008798	Wild	Male	3	1:DECEASED	31-50	Anti-PD-1/PD-L1	P-0008798-T01-IM5	Head and Neck Cancer	Metastasis	41	0.97872	3	1	NA	NA	NA
P-0000621	Wild	Male	7	1:DECEASED	31-50	Anti-PD-1/PD-L1	P-0000621-T01-IM3	Head and Neck Cancer	Metastasis	44	4.43662	7	1	NA	NA	NA
P-0019297	Wild	Female	11	0:LIVING	31-50	Anti-PD-1/PD-L1	P-0019297-T01-IM6	Head and Neck Cancer	Primary	44	4.32349	11	0	NA	NA	NA
P-0004416	Wild	Male	1	1:DECEASED	31-50	Anti-PD-1/PD-L1	P-0004416-T01-IM5	Head and Neck Cancer	Metastasis	45	1.95744	1	1	NA	NA	NA
P-0016243	Wild	Male	3	1:DECEASED	31-50	Anti-PD-1/PD-L1	P-0016243-T01-IM6	Head and Neck Cancer	Metastasis	45	0	3	1	NA	NA	NA
P-0016562	Wild	Male	16	0:LIVING	31-50	Anti-PD-1/PD-L1	P-0016562-T01-IM6	Head and Neck Cancer	Metastasis	45	7.78228	16	0	NA	NA	NA
P-0019540	Wild	Male	2	1:DECEASED	31-50	Anti-PD-1/PD-L1	P-0019540-T01-IM6	Head and Neck Cancer	Metastasis	46	6.05289	2	1	NA	NA	NA
P-0017678	Wild	Male	14	0:LIVING	31-50	Anti-PD-1/PD-L1	P-0017678-T01-IM6	Head and Neck Cancer	Metastasis	47	9.51168	14	0	NA	NA	NA
P-0018185	Wild	Female	14	0:LIVING	31-50	Anti-PD-1/PD-L1	P-0018185-T01-IM6	Head and Neck Cancer	Primary	49	4.32349	14	0	NA	NA	NA
P-0007384	Wild	Male	12	1:DECEASED	31-50	Anti-PD-1/PD-L1+CTLA-4	P-0007384-T01-IM5	Head and Neck Cancer	Primary	50	4.8936	12	1	NA	NA	NA
P-0002185	Wild	Male	10	1:DECEASED	31-50	Anti-PD-1/PD-L1	P-0002185-T01-IM3	Head and Neck Cancer	Metastasis	51	5.54578	10	1	NA	NA	NA
P-0003711	Wild	Male	5	1:DECEASED	31-50	Anti-PD-1/PD-L1	P-0003711-T01-IM5	Head and Neck Cancer	Metastasis	51	6.85104	5	1	NA	NA	NA
P-0010816	Wild	Male	7	1:DECEASED	31-50	Anti-PD-1/PD-L1	P-0010816-T01-IM5	Head and Neck Cancer	Primary	51	7.82976	7	1	NA	NA	NA
P-0020113	Wild	Male	9	1:DECEASED	31-50	Anti-PD-1/PD-L1	P-0020113-T01-IM6	Head and Neck Cancer	Metastasis	51	2.59409	9	1	NA	NA	NA
P-0024386	Wild	Male	2	0:LIVING	31-50	Anti-PD-1/PD-L1	P-0024386-T01-IM6	Head and Neck Cancer	Primary	51	6.91758	2	0	NA	NA	NA
P-0019316	XMut	Male	10	1:DECEASED	31-50	Anti-PD-1/PD-L1	P-0019316-T01-IM6	Head and Neck Cancer	Primary	52	8.64698	10	1	NA	NA	NA
P-0003009	Wild	Female	28	1:DECEASED	50-60	Anti-PD-1/PD-L1+CTLA-4	P-0003009-T01-IM3	Head and Neck Cancer	Primary	52	8.87324	28	1	NA	NA	NA
P-0017414	Wild	Male	12	0:LIVING	50-60	Anti-PD-1/PD-L1	P-0017414-T01-IM6	Head and Neck Cancer	Metastasis	52	0	12	0	NA	NA	NA
P-0025544	Wild	Male	3	0:LIVING	31-50	Anti-PD-1/PD-L1	P-0025544-T01-IM6	Head and Neck Cancer	Metastasis	52	7.78228	3	0	NA	NA	NA
P-0007622	Wild	Male	2	1:DECEASED	50-60	Anti-PD-1/PD-L1+CTLA-4	P-0007622-T01-IM5	Head and Neck Cancer	Metastasis	53	5.87232	2	1	NA	NA	NA
P-0008169	Wild	Female	6	1:DECEASED	50-60	Anti-PD-1/PD-L1	P-0008169-T01-IM5	Head and Neck Cancer	Metastasis	53	6.85104	6	1	NA	NA	NA
P-0010161	Wild	Male	2	1:DECEASED	50-60	Anti-PD-1/PD-L1	P-0010161-T01-IM5	Head and Neck Cancer	Metastasis	53	0	2	1	NA	NA	NA
P-0014898	Wild	Male	2	1:DECEASED	50-60	Anti-PD-1/PD-L1	P-0014898-T01-IM6	Head and Neck Cancer	Metastasis	53	5.18819	2	1	NA	NA	NA
P-0014965	Wild	Male	12	0:LIVING	50-60	Anti-PD-1/PD-L1	P-0014965-T01-IM6	Head and Neck Cancer	Metastasis	53	1.7294	12	0	NA	NA	NA
P-0021621	Wild	Female	19	0:LIVING	50-60	Anti-PD-1/PD-L1	P-0021621-T01-IM6	Head and Neck Cancer	Metastasis	53	3.45879	19	0	NA	NA	NA
P-0001538	Wild	Male	6	1:DECEASED	50-60	Anti-PD-1/PD-L1	P-0001538-T01-IM3	Head and Neck Cancer	Primary	54	4.43662	6	1	NA	NA	NA
P-0007620	Wild	Male	32	0:LIVING	50-60	Anti-PD-1/PD-L1	P-0007620-T01-IM5	Head and Neck Cancer	Metastasis	54	5.87232	32	0	NA	NA	NA
P-0007839	Wild	Male	11	1:DECEASED	50-60	Anti-PD-1/PD-L1	P-0007839-T01-IM5	Head and Neck Cancer	Metastasis	54	1.95744	11	1	NA	NA	NA
P-0002469	Wild	Male	8	1:DECEASED	50-60	Anti-PD-1/PD-L1	P-0002469-T01-IM3	Head and Neck Cancer	Metastasis	55	3.32747	8	1	NA	NA	NA
P-0002745	Wild	Female	2	1:DECEASED	50-60	Anti-PD-1/PD-L1	P-0002745-T01-IM3	Head and Neck Cancer	Primary	55	2.21831	2	1	NA	NA	NA
P-0003374	Wild	Male	1	1:DECEASED	50-60	Anti-PD-1/PD-L1	P-0003374-T01-IM5	Head and Neck Cancer	Metastasis	55	1.95744	1	1	NA	NA	NA
P-0007925	Wild	Male	5	1:DECEASED	50-60	Anti-PD-1/PD-L1+CTLA-4	P-0007925-T01-IM5	Head and Neck Cancer	Primary	55	3.91488	5	1	NA	NA	NA
P-0016240	Wild	Female	10	0:LIVING	50-60	Anti-PD-1/PD-L1	P-0016240-T01-IM6	Head and Neck Cancer	Primary	55	2.59409	10	0	NA	NA	NA
P-0023749	Wild	Male	2	0:LIVING	50-60	Anti-PD-1/PD-L1	P-0023749-T01-IM6	Head and Neck Cancer	Metastasis	55	6.91758	2	0	NA	NA	NA
P-0000768	Wild	Male	35	1:DECEASED	50-60	Anti-PD-1/PD-L1	P-0000768-T01-IM3	Head and Neck Cancer	Metastasis	58	4.43662	35	1	NA	NA	NA
P-0005791	Wild	Male	25	0:LIVING	50-60	Anti-PD-1/PD-L1	P-0005791-T01-IM5	Head and Neck Cancer	Primary	58	3.91488	25	0	NA	NA	NA
P-0006826	Wild	Male	28	1:DECEASED	50-60	Anti-PD-1/PD-L1	P-0006826-T01-IM5	Head and Neck Cancer	Metastasis	58	4.8936	28	1	NA	NA	NA
P-0023557	Wild	Male	5	0:LIVING	50-60	Anti-PD-1/PD-L1	P-0023557-T01-IM6	Head and Neck Cancer	Primary	58	5.18819	5	0	NA	NA	NA
P-0008800	Wild	Male	5	1:DECEASED	50-60	Anti-PD-1/PD-L1	P-0008800-T02-IM5	Head and Neck Cancer	Metastasis	59	2.93616	5	1	NA	NA	NA
P-0009969	Wild	Male	3	0:LIVING	50-60	Anti-PD-1/PD-L1	P-0009969-T01-IM5	Head and Neck Cancer	Primary	59	2.93616	3	0	NA	NA	NA
P-0012189	Wild	Female	2	1:DECEASED	50-60	Anti-PD-1/PD-L1	P-0012189-T01-IM5	Head and Neck Cancer	Metastasis	59	8.80848	2	1	NA	NA	NA
P-0013652	Wild	Male	3	1:DECEASED	50-60	Anti-PD-1/PD-L1	P-0013652-T01-IM5	Head and Neck Cancer	Primary	59	8.80848	3	1	NA	NA	NA
P-0019240	Wild	Male	3	1:DECEASED	50-60	Anti-PD-1/PD-L1	P-0019240-T01-IM6	Head and Neck Cancer	Metastasis	59	0.864698	3	1	NA	NA	NA
P-0000227	Wild	Female	7	0:LIVING	61-70	Anti-PD-1/PD-L1	P-0000227-T01-IM3	Head and Neck Cancer	Primary	60	0	7	0	NA	NA	NA
P-0005082	Wild	Male	34	1:DECEASED	50-60	Anti-PD-1/PD-L1	P-0005082-T01-IM5	Head and Neck Cancer	Metastasis	60	0	34	1	NA	NA	NA
P-0006439	Wild	Male	2	0:LIVING	61-70	Anti-PD-1/PD-L1	P-0006439-T01-IM5	Head and Neck Cancer	Primary	60	4.8936	2	0	NA	NA	NA
P-0020965	Wild	Male	4	1:DECEASED	50-60	Anti-PD-1/PD-L1	P-0020965-T01-IM6	Head and Neck Cancer	Metastasis	60	4.32349	4	1	NA	NA	NA
P-0010088	Wild	Male	18	0:LIVING	61-70	Anti-PD-1/PD-L1	P-0010088-T01-IM5	Head and Neck Cancer	Metastasis	61	12.7234	18	0	NA	NA	NA
P-0018188	Wild	Female	4	1:DECEASED	50-60	Anti-PD-1/PD-L1	P-0018188-T01-IM6	Head and Neck Cancer	Metastasis	61	7.78228	4	1	NA	NA	NA
P-0025373	Wild	Male	1	0:LIVING	50-60	Anti-PD-1/PD-L1	P-0025373-T01-IM6	Head and Neck Cancer	Metastasis	61	11.2411	1	0	NA	NA	NA
P-0025720	Wild	Male	2	0:LIVING	50-60	Anti-PD-1/PD-L1	P-0025720-T01-IM6	Head and Neck Cancer	Metastasis	61	6.05289	2	0	NA	NA	NA
P-0010312	Wild	Male	29	1:DECEASED	50-60	Anti-PD-1/PD-L1	P-0010312-T01-IM5	Head and Neck Cancer	Metastasis	62	0.97872	29	1	NA	NA	NA
P-0010755	Wild	Male	2	1:DECEASED	61-70	Anti-PD-1/PD-L1	P-0010755-T01-IM5	Head and Neck Cancer	Metastasis	62	1.95744	2	1	NA	NA	NA
P-0015591	Wild	Male	14	1:DECEASED	61-70	Anti-PD-1/PD-L1	P-0015591-T01-IM6	Head and Neck Cancer	Metastasis	62	0	14	1	NA	NA	NA
P-0019258	Wild	Male	3	1:DECEASED	61-70	Anti-PD-1/PD-L1	P-0019258-T01-IM6	Head and Neck Cancer	Metastasis	62	6.91758	3	1	NA	NA	NA
P-0020040	Wild	Male	10	1:DECEASED	61-70	Anti-PD-1/PD-L1	P-0020040-T01-IM6	Head and Neck Cancer	Primary	62	3.45879	10	1	NA	NA	NA
P-0020846	Wild	Male	3	1:DECEASED	61-70	Anti-PD-1/PD-L1	P-0020846-T01-IM6	Head and Neck Cancer	Metastasis	62	4.32349	3	1	NA	NA	NA
P-0022502	Wild	Male	6	0:LIVING	61-70	Anti-PD-1/PD-L1	P-0022502-T01-IM6	Head and Neck Cancer	Metastasis	62	12.1058	6	0	NA	NA	NA
P-0024576	Wild	Male	3	0:LIVING	61-70	Anti-PD-1/PD-L1	P-0024576-T01-IM6	Head and Neck Cancer	Primary	62	8.64698	3	0	NA	NA	NA
P-0001794	Wild	Male	4	1:DECEASED	61-70	Anti-PD-1/PD-L1	P-0001794-T01-IM3	Head and Neck Cancer	Metastasis	63	3.32747	4	1	NA	NA	NA
P-0002193	Wild	Male	11	1:DECEASED	61-70	Anti-PD-1/PD-L1	P-0002193-T01-IM3	Head and Neck Cancer	Metastasis	63	0	11	1	NA	NA	NA
P-0002787	Wild	Male	6	0:LIVING	61-70	Anti-PD-1/PD-L1	P-0002787-T01-IM3	Head and Neck Cancer	Metastasis	63	5.54578	6	0	NA	NA	NA
P-0006008	Wild	Male	7	1:DECEASED	61-70	Anti-PD-1/PD-L1	P-0006008-T01-IM5	Head and Neck Cancer	Primary	63	8.80848	7	1	NA	NA	NA
P-0012883	Wild	Male	3	0:LIVING	61-70	Anti-PD-1/PD-L1	P-0012883-T01-IM5	Head and Neck Cancer	Primary	63	15.6595	3	0	NA	NA	NA
P-0016062	Wild	Male	14	0:LIVING	61-70	Anti-PD-1/PD-L1	P-0016062-T01-IM6	Head and Neck Cancer	Primary	63	10.3764	14	0	NA	NA	NA
P-0020649	Wild	Male	8	0:LIVING	61-70	Anti-PD-1/PD-L1	P-0020649-T01-IM6	Head and Neck Cancer	Metastasis	63	1.7294	8	0	NA	NA	NA
P-0007407	Wild	Male	11	1:DECEASED	61-70	Anti-PD-1/PD-L1	P-0007407-T01-IM5	Head and Neck Cancer	Primary	65	11.7446	11	1	NA	NA	NA
P-0007575	Wild	Male	4	1:DECEASED	61-70	Anti-PD-1/PD-L1	P-0007575-T01-IM5	Head and Neck Cancer	Metastasis	65	5.87232	4	1	NA	NA	NA
P-0021915	Wild	Male	7	1:DECEASED	61-70	Anti-PD-1/PD-L1	P-0021915-T01-IM6	Head and Neck Cancer	Metastasis	65	6.91758	7	1	NA	NA	NA
P-0004492	Wild	Male	20	1:DECEASED	61-70	Anti-PD-1/PD-L1	P-0004492-T01-IM5	Head and Neck Cancer	Metastasis	66	2.93616	20	1	NA	NA	NA
P-0006525	Wild	Female	2	1:DECEASED	61-70	Anti-PD-1/PD-L1	P-0006525-T01-IM5	Head and Neck Cancer	Metastasis	66	3.91488	2	1	NA	NA	NA
P-0008033	Wild	Male	8	1:DECEASED	61-70	Anti-PD-1/PD-L1	P-0008033-T01-IM5	Head and Neck Cancer	Metastasis	66	3.91488	8	1	NA	NA	NA
P-0008528	Wild	Male	5	1:DECEASED	61-70	Anti-PD-1/PD-L1+CTLA-4	P-0008528-T01-IM5	Head and Neck Cancer	Metastasis	66	7.82976	5	1	NA	NA	NA
P-0009202	Wild	Male	15	0:LIVING	61-70	Anti-PD-1/PD-L1	P-0009202-T01-IM5	Head and Neck Cancer	Primary	66	11.7446	15	0	NA	0	PR
P-0012107	Wild	Male	21	0:LIVING	61-70	Anti-PD-1/PD-L1	P-0012107-T01-IM5	Head and Neck Cancer	Metastasis	66	11.7446	21	0	NA	NA	NA
P-0014060	Wild	Female	7	0:LIVING	61-70	Anti-PD-1/PD-L1	P-0014060-T01-IM5	Head and Neck Cancer	Metastasis	66	5.87232	7	0	NA	NA	NA
P-0017717	Wild	Male	12	0:LIVING	61-70	Anti-PD-1/PD-L1	P-0017717-T01-IM6	Head and Neck Cancer	Primary	66	4.32349	12	0	NA	NA	NA
P-0007220	Wild	Male	15	0:LIVING	61-70	Anti-PD-1/PD-L1	P-0007220-T01-IM5	Head and Neck Cancer	Metastasis	67	9.7872	15	0	NA	NA	NA
P-0007543	Wild	Male	11	0:LIVING	61-70	Anti-PD-1/PD-L1	P-0007543-T01-IM5	Head and Neck Cancer	Metastasis	67	3.91488	11	0	NA	NA	NA
P-0014015	Wild	Male	19	0:LIVING	61-70	Anti-PD-1/PD-L1	P-0014015-T01-IM5	Head and Neck Cancer	Metastasis	67	9.7872	19	0	NA	NA	NA
P-0020146	Wild	Female	2	1:DECEASED	61-70	Anti-PD-1/PD-L1	P-0020146-T01-IM6	Head and Neck Cancer	Primary	67	10.3764	2	1	NA	NA	NA
P-0020156	Wild	Female	8	0:LIVING	61-70	Anti-PD-1/PD-L1	P-0020156-T01-IM6	Head and Neck Cancer	Metastasis	67	17.294	8	0	NA	NA	NA
P-0026282	Wild	Male	3	0:LIVING	61-70	Anti-PD-1/PD-L1	P-0026282-T01-IM6	Head and Neck Cancer	Primary	67	2.59409	3	0	NA	NA	NA
P-0003726	Wild	Female	15	0:LIVING	61-70	Anti-PD-1/PD-L1	P-0003726-T01-IM5	Head and Neck Cancer	Metastasis	68	0	15	0	NA	NA	NA
P-0005869	Wild	Male	7	1:DECEASED	61-70	Anti-PD-1/PD-L1	P-0005869-T01-IM5	Head and Neck Cancer	Metastasis	68	1.95744	7	1	NA	NA	NA
P-0010174	Wild	Male	7	0:LIVING	61-70	Anti-PD-1/PD-L1	P-0010174-T01-IM5	Head and Neck Cancer	Primary	68	10.7659	7	0	NA	NA	NA
P-0012370	Wild	Male	14	1:DECEASED	61-70	Anti-PD-1/PD-L1	P-0012370-T01-IM5	Head and Neck Cancer	Metastasis	68	0.97872	14	1	NA	NA	NA
P-0013892	Wild	Male	16	1:DECEASED	61-70	Anti-PD-1/PD-L1	P-0013892-T01-IM5	Head and Neck Cancer	Metastasis	68	1.95744	16	1	NA	NA	NA
P-0014022	Wild	Male	9	1:DECEASED	61-70	Anti-PD-1/PD-L1	P-0014022-T01-IM5	Head and Neck Cancer	Metastasis	68	0	9	1	NA	NA	NA
P-0016835	Wild	Female	5	0:LIVING	61-70	Anti-PD-1/PD-L1	P-0016835-T01-IM6	Head and Neck Cancer	Metastasis	68	6.05289	5	0	NA	NA	NA
P-0017508	Wild	Female	2	1:DECEASED	61-70	Anti-PD-1/PD-L1	P-0017508-T01-IM6	Head and Neck Cancer	Primary	68	4.32349	2	1	NA	NA	NA
P-0021474	Wild	Male	51	0:LIVING	61-70	Anti-PD-1/PD-L1	P-0021474-T01-IM6	Head and Neck Cancer	Metastasis	68	2.59409	51	0	NA	NA	NA
P-0024866	Wild	Male	3	0:LIVING	61-70	Anti-PD-1/PD-L1	P-0024866-T01-IM6	Head and Neck Cancer	Primary	68	57.9348	3	0	NA	NA	NA
P-0001186	Wild	Male	6	1:DECEASED	61-70	Anti-PD-1/PD-L1	P-0001186-T01-IM3	Head and Neck Cancer	Metastasis	69	1.10916	6	1	NA	NA	NA
P-0018925	Wild	Male	2	1:DECEASED	61-70	Anti-PD-1/PD-L1	P-0018925-T01-IM6	Head and Neck Cancer	Metastasis	69	17.294	2	1	NA	NA	NA
P-0020147	Wild	Male	9	0:LIVING	61-70	Anti-PD-1/PD-L1	P-0020147-T01-IM6	Head and Neck Cancer	Metastasis	69	5.18819	9	0	NA	NA	NA
P-0002818	Wild	Female	15	0:LIVING	61-70	Anti-PD-1/PD-L1	P-0002818-T01-IM3	Head and Neck Cancer	Metastasis	70	19.9648	15	0	NA	NA	NA
P-0008792	Wild	Male	21	0:LIVING	61-70	Anti-PD-1/PD-L1	P-0008792-T01-IM5	Head and Neck Cancer	Metastasis	70	10.7659	21	0	NA	NA	NA
P-0013920	Wild	Male	8	1:DECEASED	61-70	Anti-PD-1/PD-L1	P-0013920-T01-IM5	Head and Neck Cancer	Metastasis	70	8.80848	8	1	NA	NA	NA
P-0022441	Wild	Female	3	0:LIVING	61-70	Anti-PD-1/PD-L1	P-0022441-T01-IM6	Head and Neck Cancer	Metastasis	70	11.2411	3	0	NA	NA	NA
P-0000454	Wild	Male	9	0:LIVING	61-70	Anti-PD-1/PD-L1	P-0000454-T01-IM3	Head and Neck Cancer	Metastasis	71	2.21831	9	0	NA	NA	NA
P-0007971	Wild	Male	29	1:DECEASED	61-70	Anti-PD-1/PD-L1	P-0007971-T01-IM5	Head and Neck Cancer	Metastasis	71	5.87232	29	1	NA	NA	NA
P-0023896	Wild	Male	14	0:LIVING	61-70	Anti-PD-1/PD-L1	P-0023896-T01-IM6	Head and Neck Cancer	Primary	71	3.45879	14	0	NA	NA	NA
P-0010222	Wild	Male	4	1:DECEASED	>71	Anti-PD-1/PD-L1	P-0010222-T01-IM5	Head and Neck Cancer	Metastasis	72	2.93616	4	1	NA	NA	NA
P-0015745	Wild	Male	14	0:LIVING	>71	Anti-PD-1/PD-L1	P-0015745-T01-IM6	Head and Neck Cancer	Metastasis	72	5.18819	14	0	NA	NA	NA
P-0008518	Wild	Male	2	1:DECEASED	>71	Anti-PD-1/PD-L1	P-0008518-T01-IM5	Head and Neck Cancer	Metastasis	73	0.97872	2	1	NA	NA	NA
P-0010450	Wild	Male	14	1:DECEASED	>71	Anti-PD-1/PD-L1	P-0010450-T01-IM5	Head and Neck Cancer	Metastasis	73	8.80848	14	1	NA	NA	NA
P-0008323	Wild	Male	4	1:DECEASED	>71	Anti-PD-1/PD-L1	P-0008323-T01-IM5	Head and Neck Cancer	Metastasis	74	0	4	1	NA	NA	NA
P-0016210	Wild	Male	14	0:LIVING	>71	Anti-PD-1/PD-L1	P-0016210-T01-IM6	Head and Neck Cancer	Metastasis	74	4.32349	14	0	NA	NA	NA
P-0006641	Wild	Female	9	1:DECEASED	>71	Anti-PD-1/PD-L1	P-0006641-T01-IM5	Head and Neck Cancer	Metastasis	75	4.8936	9	1	NA	NA	NA
P-0023015	Wild	Male	3	0:LIVING	>71	Anti-PD-1/PD-L1	P-0023015-T01-IM6	Head and Neck Cancer	Metastasis	75	6.91758	3	0	NA	NA	NA
P-0023948	Wild	Male	4	0:LIVING	>71	Anti-PD-1/PD-L1	P-0023948-T01-IM6	Head and Neck Cancer	Metastasis	75	14.6999	4	0	NA	NA	NA
P-0001598	XMut	Male	34	0:LIVING	>71	Anti-PD-1/PD-L1	P-0001598-T01-IM3	Head and Neck Cancer	Primary	76	11.0916	34	0	NA	NA	NA
P-0002603	Wild	Male	6	0:LIVING	>71	Anti-PD-1/PD-L1	P-0002603-T01-IM3	Head and Neck Cancer	Metastasis	76	1.10916	6	0	NA	NA	NA
P-0017687	Wild	Female	11	0:LIVING	>71	Anti-PD-1/PD-L1	P-0017687-T01-IM6	Head and Neck Cancer	Metastasis	76	7.78228	11	0	NA	NA	NA
P-0008353	Wild	Male	8	1:DECEASED	>71	Anti-PD-1/PD-L1	P-0008353-T01-IM5	Head and Neck Cancer	Metastasis	77	24.468	8	1	NA	NA	NA
P-0010082	Wild	Male	1	1:DECEASED	>71	Anti-PD-1/PD-L1	P-0010082-T01-IM5	Head and Neck Cancer	Metastasis	77	3.91488	1	1	NA	NA	NA
P-0016025	Wild	Female	15	0:LIVING	>71	Anti-PD-1/PD-L1	P-0016025-T01-IM6	Head and Neck Cancer	Primary	77	23.3468	15	0	NA	NA	NA
P-0019407	Wild	Male	5	1:DECEASED	>71	Anti-PD-1/PD-L1	P-0019407-T01-IM6	Head and Neck Cancer	Metastasis	77	12.1058	5	1	NA	NA	NA
P-0016191	Wild	Male	7	0:LIVING	>71	Anti-PD-1/PD-L1	P-0016191-T01-IM6	Head and Neck Cancer	Primary	78	7.78228	7	0	NA	NA	NA
P-0008036	Wild	Female	2	1:DECEASED	>71	Anti-PD-1/PD-L1+CTLA-4	P-0008036-T01-IM5	Head and Neck Cancer	Metastasis	79	3.91488	2	1	NA	NA	NA
P-0010707	Wild	Male	15	1:DECEASED	>71	Anti-PD-1/PD-L1	P-0010707-T01-IM5	Head and Neck Cancer	Primary	79	3.91488	15	1	NA	NA	NA
P-0013278	Wild	Male	33	1:DECEASED	>71	Anti-PD-1/PD-L1	P-0013278-T01-IM5	Head and Neck Cancer	Metastasis	79	7.82976	33	1	NA	NA	NA
P-0010588	XMut	Female	4	1:DECEASED	>71	Anti-PD-1/PD-L1	P-0010588-T01-IM5	Head and Neck Cancer	Primary	80	4.8936	4	1	NA	NA	NA
P-0009188	Wild	Male	27	0:LIVING	>71	Anti-PD-1/PD-L1+CTLA-4	P-0009188-T01-IM5	Head and Neck Cancer	Metastasis	81	6.85104	27	0	NA	NA	NA
P-0000958	Wild	Female	35	0:LIVING	<30	Anti-CTLA-4	P-0000958-T01-IM3	Melanoma	Primary	16	2.21831	35	0	NA	NA	NA
P-0015007	Wild	Male	19	0:LIVING	<30	Anti-PD-1/PD-L1	P-0015007-T01-IM6	Melanoma	Metastasis	20	6.05289	19	0	NA	NA	NA
P-0004203	Wild	Male	32	0:LIVING	<30	Anti-PD-1/PD-L1+CTLA-4	P-0004203-T01-IM5	Melanoma	Metastasis	23	8.80848	32	0	NA	NA	NA
P-0012869	Wild	Female	14	1:DECEASED	<30	Anti-PD-1/PD-L1	P-0012869-T01-IM5	Melanoma	Metastasis	23	4.8936	14	1	NA	NA	NA
P-0005157	Wild	Male	7	1:DECEASED	<30	Anti-PD-1/PD-L1+CTLA-4	P-0005157-T01-IM5	Melanoma	Metastasis	25	3.91488	7	1	NA	NA	NA
P-0005583	Wild	Female	1	1:DECEASED	<30	Anti-PD-1/PD-L1+CTLA-4	P-0005583-T01-IM5	Melanoma	Metastasis	25	5.87232	1	1	NA	NA	NA
P-0005971	Wild	Female	13	1:DECEASED	<30	Anti-PD-1/PD-L1+CTLA-4	P-0005971-T01-IM5	Melanoma	Metastasis	25	2.93616	13	1	NA	NA	NA
P-0005493	Wild	Male	31	0:LIVING	<30	Anti-PD-1/PD-L1+CTLA-4	P-0005493-T01-IM5	Melanoma	Metastasis	27	6.85104	31	0	NA	NA	NA
P-0008492	Wild	Male	14	1:DECEASED	<30	Anti-PD-1/PD-L1+CTLA-4	P-0008492-T02-IM5	Melanoma	Metastasis	28	2.93616	14	1	NA	NA	NA
P-0008912	Wild	Female	1	1:DECEASED	<30	Anti-PD-1/PD-L1+CTLA-4	P-0008912-T01-IM5	Melanoma	Metastasis	28	15.6595	1	1	NA	NA	NA
P-0002418	Wild	Female	31	0:LIVING	<30	Anti-CTLA-4	P-0002418-T01-IM3	Melanoma	Metastasis	30	3.32747	31	0	NA	NA	NA
P-0007238	Wild	Male	28	0:LIVING	<30	Anti-PD-1/PD-L1	P-0007238-T01-IM5	Melanoma	Metastasis	30	1.95744	28	0	NA	NA	NA
P-0014666	Wild	Female	17	0:LIVING	<30	Anti-PD-1/PD-L1	P-0014666-T01-IM6	Melanoma	Metastasis	30	0	17	0	NA	NA	NA
P-0008904	Wild	Female	11	1:DECEASED	<30	Anti-PD-1/PD-L1+CTLA-4	P-0008904-T01-IM5	Melanoma	Metastasis	31	1.95744	11	1	NA	NA	NA
P-0004661	Wild	Male	32	0:LIVING	31-50	Anti-PD-1/PD-L1+CTLA-4	P-0004661-T01-IM5	Melanoma	Metastasis	33	6.85104	32	0	NA	NA	NA
P-0005604	Wild	Male	30	0:LIVING	31-50	Anti-PD-1/PD-L1+CTLA-4	P-0005604-T01-IM5	Melanoma	Metastasis	33	4.8936	30	0	NA	NA	NA
P-0007736	Wild	Female	71	0:LIVING	<30	Anti-CTLA-4	P-0007736-T01-IM5	Melanoma	Metastasis	33	11.7446	71	0	NA	NA	NA
P-0015511	Wild	Male	15	0:LIVING	31-50	Anti-PD-1/PD-L1+CTLA-4	P-0015511-T01-IM6	Melanoma	Metastasis	33	12.9705	15	0	NA	NA	NA
P-0015373	Wild	Male	17	0:LIVING	31-50	Anti-PD-1/PD-L1+CTLA-4	P-0015373-T01-IM6	Melanoma	Primary	34	29.3997	17	0	NA	NA	NA
P-0006192	Wild	Female	30	0:LIVING	31-50	Anti-PD-1/PD-L1+CTLA-4	P-0006192-T01-IM5	Melanoma	Metastasis	35	6.85104	30	0	NA	NA	NA
P-0010111	Wild	Female	13	0:LIVING	31-50	Anti-CTLA-4	P-0010111-T01-IM5	Melanoma	Primary	35	1.95744	13	0	NA	NA	NA
P-0002018	Wild	Female	4	1:DECEASED	31-50	Anti-PD-1/PD-L1+CTLA-4	P-0002018-T01-IM3	Melanoma	Metastasis	36	4.43662	4	1	NA	NA	NA
P-0003742	Wild	Female	18	1:DECEASED	31-50	Anti-CTLA-4	P-0003742-T01-IM5	Melanoma	Metastasis	36	4.8936	18	1	NA	NA	NA
P-0007561	Wild	Female	0	1:DECEASED	31-50	Anti-PD-1/PD-L1+CTLA-4	P-0007561-T01-IM5	Melanoma	Metastasis	36	33.2765	0	1	NA	NA	NA
P-0004706	Wild	Male	13	1:DECEASED	31-50	Anti-PD-1/PD-L1+CTLA-4	P-0004706-T01-IM5	Melanoma	Metastasis	39	3.91488	13	1	NA	NA	NA
P-0010644	Wild	Male	10	1:DECEASED	31-50	Anti-PD-1/PD-L1	P-0010644-T01-IM5	Melanoma	Metastasis	40	0.97872	10	1	NA	NA	NA
P-0005383	Wild	Male	49	0:LIVING	31-50	Anti-PD-1/PD-L1	P-0005383-T01-IM5	Melanoma	Metastasis	41	21.5318	49	0	NA	NA	NA
P-0009180	Wild	Female	4	1:DECEASED	31-50	Anti-PD-1/PD-L1+CTLA-4	P-0009180-T01-IM5	Melanoma	Metastasis	41	1.95744	4	1	NA	NA	NA
P-0004132	XMut	Male	22	1:DECEASED	31-50	Anti-PD-1/PD-L1+CTLA-4	P-0004132-T01-IM5	Melanoma	Metastasis	42	4.8936	22	1	NA	NA	NA
P-0009527	Wild	Female	19	0:LIVING	31-50	Anti-PD-1/PD-L1+CTLA-4	P-0009527-T01-IM5	Melanoma	Metastasis	42	12.7234	19	0	NA	NA	NA
P-0015977	Wild	Female	17	0:LIVING	31-50	Anti-PD-1/PD-L1+CTLA-4	P-0015977-T01-IM6	Melanoma	Metastasis	42	2.59409	17	0	NA	NA	NA
P-0002507	Wild	Female	10	1:DECEASED	31-50	Anti-PD-1/PD-L1	P-0002507-T01-IM3	Melanoma	Primary	43	5.54578	10	1	NA	NA	NA
P-0006476	Wild	Male	58	1:DECEASED	31-50	Anti-CTLA-4	P-0006476-T01-IM5	Melanoma	Metastasis	43	11.7446	58	1	NA	NA	NA
P-0013956	Wild	Female	8	1:DECEASED	31-50	Anti-PD-1/PD-L1	P-0013956-T01-IM5	Melanoma	Metastasis	44	5.87232	8	1	NA	NA	NA
P-0014148	Wild	Female	80	0:LIVING	31-50	Anti-CTLA-4	P-0014148-T01-IM5	Melanoma	Metastasis	44	45.0211	80	0	NA	NA	NA
P-0001706	Wild	Male	15	1:DECEASED	31-50	Anti-PD-1/PD-L1	P-0001706-T01-IM3	Melanoma	Metastasis	45	22.1831	15	1	NA	NA	NA
P-0012446	Wild	Female	20	0:LIVING	31-50	Anti-PD-1/PD-L1+CTLA-4	P-0012446-T01-IM5	Melanoma	Metastasis	45	25.4467	20	0	NA	NA	NA
P-0014229	Wild	Female	16	0:LIVING	31-50	Anti-PD-1/PD-L1	P-0014229-T01-IM6	Melanoma	Metastasis	45	29.3997	16	0	NA	NA	NA
P-0011297	XMut	Male	66	0:LIVING	31-50	Anti-CTLA-4	P-0011297-T01-IM5	Melanoma	Metastasis	46	3.91488	66	0	NA	NA	NA
P-0008963	Wild	Male	44	0:LIVING	31-50	Anti-CTLA-4	P-0008963-T01-IM5	Melanoma	Metastasis	46	8.80848	44	0	NA	NA	NA
P-0010140	Wild	Female	21	0:LIVING	31-50	Anti-PD-1/PD-L1	P-0010140-T01-IM5	Melanoma	Metastasis	46	0	21	0	NA	NA	NA
P-0016506	Wild	Female	14	0:LIVING	31-50	Anti-PD-1/PD-L1	P-0016506-T01-IM6	Melanoma	Metastasis	46	3.45879	14	0	NA	NA	NA
P-0009148	XMut	Male	45	0:LIVING	31-50	Anti-CTLA-4	P-0009148-T01-IM5	Melanoma	Metastasis	47	14.6808	45	0	NA	NA	NA
P-0002353	Wild	Female	21	1:DECEASED	31-50	Anti-CTLA-4	P-0002353-T01-IM3	Melanoma	Metastasis	47	18.8556	21	1	NA	NA	NA
P-0003921	Wild	Male	7	0:LIVING	31-50	Anti-PD-1/PD-L1+CTLA-4	P-0003921-T01-IM5	Melanoma	Metastasis	47	14.6808	7	0	NA	NA	NA
P-0005304	Wild	Female	1	1:DECEASED	31-50	Anti-PD-1/PD-L1+CTLA-4	P-0005304-T01-IM5	Melanoma	Primary	47	1.95744	1	1	NA	NA	NA
P-0013035	Wild	Female	55	0:LIVING	31-50	Anti-CTLA-4	P-0013035-T01-IM5	Melanoma	Metastasis	47	3.91488	55	0	NA	NA	NA
P-0015679	Wild	Male	18	0:LIVING	31-50	Anti-PD-1/PD-L1+CTLA-4	P-0015679-T01-IM6	Melanoma	Metastasis	47	5.18819	18	0	NA	NA	NA
P-0003401	Wild	Female	25	1:DECEASED	31-50	Anti-CTLA-4	P-0003401-T01-IM5	Melanoma	Metastasis	48	0.97872	25	1	NA	NA	NA
P-0009308	Wild	Female	22	0:LIVING	31-50	Anti-PD-1/PD-L1+CTLA-4	P-0009308-T01-IM5	Melanoma	Metastasis	48	0.97872	22	0	NA	NA	NA
P-0012529	Wild	Male	4	1:DECEASED	31-50	Anti-PD-1/PD-L1	P-0012529-T01-IM5	Melanoma	Metastasis	48	10.7659	4	1	NA	NA	NA
P-0014379	Wild	Male	17	0:LIVING	31-50	Anti-PD-1/PD-L1	P-0014379-T01-IM6	Melanoma	Metastasis	48	0.864698	17	0	NA	NA	NA
P-0003621	Wild	Female	35	0:LIVING	31-50	Anti-PD-1/PD-L1+CTLA-4	P-0003621-T01-IM5	Melanoma	Metastasis	49	2.93616	35	0	NA	NA	NA
P-0006952	Wild	Male	69	0:LIVING	31-50	Anti-CTLA-4	P-0006952-T01-IM5	Melanoma	Metastasis	49	17.617	69	0	NA	NA	NA
P-0011476	Wild	Male	16	0:LIVING	31-50	Anti-PD-1/PD-L1	P-0011476-T01-IM5	Melanoma	Metastasis	49	6.85104	16	0	NA	NA	NA
P-0001179	Wild	Female	6	1:DECEASED	31-50	Anti-PD-1/PD-L1	P-0001179-T01-IM3	Melanoma	Primary	50	3.32747	6	1	NA	NA	NA
P-0004348	Wild	Female	32	0:LIVING	31-50	Anti-PD-1/PD-L1+CTLA-4	P-0004348-T01-IM5	Melanoma	Metastasis	50	22.5106	32	0	NA	NA	NA
P-0008403	Wild	Male	24	0:LIVING	31-50	Anti-PD-1/PD-L1+CTLA-4	P-0008403-T01-IM5	Melanoma	Metastasis	50	20.5531	24	0	NA	NA	NA
P-0008445	Wild	Male	18	0:LIVING	31-50	Anti-PD-1/PD-L1+CTLA-4	P-0008445-T01-IM5	Melanoma	Metastasis	50	5.87232	18	0	NA	NA	NA
P-0008434	XMut	Female	23	0:LIVING	31-50	Anti-PD-1/PD-L1	P-0008434-T01-IM5	Melanoma	Metastasis	51	50.8934	23	0	NA	NA	NA
P-0000922	Wild	Male	17	1:DECEASED	31-50	Anti-CTLA-4	P-0000922-T01-IM3	Melanoma	Metastasis	51	4.43662	17	1	NA	NA	NA
P-0002380	Wild	Female	32	0:LIVING	50-60	Anti-PD-1/PD-L1+CTLA-4	P-0002380-T01-IM3	Melanoma	Metastasis	51	9.9824	32	0	NA	NA	NA
P-0003868	Wild	Male	49	1:DECEASED	31-50	Anti-PD-1/PD-L1+CTLA-4	P-0003868-T01-IM5	Melanoma	Metastasis	51	13.7021	49	1	NA	NA	NA
P-0006946	Wild	Male	13	1:DECEASED	31-50	Anti-CTLA-4	P-0006946-T01-IM5	Melanoma	Primary	51	2.93616	13	1	NA	NA	NA
P-0009084	Wild	Male	18	1:DECEASED	31-50	Anti-PD-1/PD-L1+CTLA-4	P-0009084-T01-IM5	Melanoma	Metastasis	51	3.91488	18	1	NA	NA	NA
P-0001081	XMut	Female	45	0:LIVING	50-60	Anti-CTLA-4	P-0001081-T01-IM3	Melanoma	Metastasis	52	45.4754	45	0	NA	NA	NA
P-0006731	Wild	Female	29	0:LIVING	50-60	Anti-PD-1/PD-L1+CTLA-4	P-0006731-T01-IM5	Melanoma	Metastasis	52	14.6808	29	0	NA	NA	NA
P-0006973	Wild	Male	61	0:LIVING	31-50	Anti-PD-1/PD-L1	P-0006973-T01-IM5	Melanoma	Metastasis	52	10.7659	61	0	NA	NA	NA
P-0010232	Wild	Male	25	0:LIVING	50-60	Anti-PD-1/PD-L1+CTLA-4	P-0010232-T01-IM5	Melanoma	Metastasis	52	13.7021	25	0	NA	NA	NA
P-0010340	Wild	Male	23	0:LIVING	50-60	Anti-CTLA-4	P-0010340-T01-IM5	Melanoma	Metastasis	52	51.8721	23	0	NA	NA	NA
P-0010115	XMut	Male	23	0:LIVING	50-60	Anti-PD-1/PD-L1	P-0010115-T01-IM5	Melanoma	Metastasis	53	51.8721	23	0	NA	NA	NA
P-0002392	Wild	Male	39	0:LIVING	50-60	Anti-CTLA-4	P-0002392-T01-IM3	Melanoma	Metastasis	53	34.3838	39	0	NA	NA	NA
P-0002765	Wild	Male	7	1:DECEASED	50-60	Anti-CTLA-4	P-0002765-T01-IM3	Melanoma	Metastasis	53	5.54578	7	1	NA	NA	NA
P-0005222	Wild	Male	69	0:LIVING	31-50	Anti-CTLA-4	P-0005222-T01-IM5	Melanoma	Metastasis	53	14.6808	69	0	NA	NA	NA
P-0005687	Wild	Male	11	1:DECEASED	50-60	Anti-PD-1/PD-L1	P-0005687-T01-IM5	Melanoma	Metastasis	53	1.95744	11	1	NA	NA	NA
P-0008999	Wild	Male	6	1:DECEASED	50-60	Anti-PD-1/PD-L1+CTLA-4	P-0008999-T01-IM5	Melanoma	Metastasis	53	10.7659	6	1	NA	NA	NA
P-0010327	Wild	Male	23	0:LIVING	50-60	Anti-PD-1/PD-L1+CTLA-4	P-0010327-T01-IM5	Melanoma	Primary	53	0.97872	23	0	NA	NA	NA
P-0000898	Wild	Male	21	1:DECEASED	50-60	Anti-CTLA-4	P-0000898-T01-IM3	Melanoma	Metastasis	54	5.54578	21	1	NA	NA	NA
P-0003620	Wild	Female	33	0:LIVING	50-60	Anti-CTLA-4	P-0003620-T01-IM5	Melanoma	Metastasis	54	19.5744	33	0	NA	NA	NA
P-0004952	Wild	Male	32	0:LIVING	50-60	Anti-PD-1/PD-L1+CTLA-4	P-0004952-T01-IM5	Melanoma	Metastasis	54	36.2126	32	0	NA	NA	NA
P-0008375	Wild	Female	1	1:DECEASED	50-60	Anti-PD-1/PD-L1+CTLA-4	P-0008375-T01-IM5	Melanoma	Metastasis	54	9.7872	1	1	NA	NA	NA
P-0014124	Wild	Female	13	0:LIVING	50-60	Anti-PD-1/PD-L1	P-0014124-T01-IM5	Melanoma	Primary	54	0	13	0	NA	NA	NA
P-0015521	Wild	Male	15	0:LIVING	50-60	Anti-PD-1/PD-L1	P-0015521-T01-IM6	Melanoma	Metastasis	54	19.0234	15	0	NA	NA	NA
P-0015530	Wild	Male	15	0:LIVING	50-60	Anti-PD-1/PD-L1	P-0015530-T01-IM6	Melanoma	Metastasis	54	5.18819	15	0	NA	NA	NA
P-0015855	Wild	Male	16	0:LIVING	50-60	Anti-PD-1/PD-L1	P-0015855-T01-IM6	Melanoma	Metastasis	54	10.3764	16	0	NA	NA	NA
P-0003197	Wild	Male	2	1:DECEASED	50-60	Anti-CTLA-4	P-0003197-T01-IM5	Melanoma	Metastasis	55	1.95744	2	1	NA	NA	NA
P-0005201	Wild	Male	32	0:LIVING	50-60	Anti-PD-1/PD-L1+CTLA-4	P-0005201-T01-IM5	Melanoma	Metastasis	55	8.80848	32	0	NA	NA	NA
P-0007970	Wild	Male	3	0:LIVING	50-60	Anti-PD-1/PD-L1+CTLA-4	P-0007970-T01-IM5	Melanoma	Metastasis	55	11.7446	3	0	NA	NA	NA
P-0008050	Wild	Male	15	0:LIVING	50-60	Anti-PD-1/PD-L1	P-0008050-T01-IM5	Melanoma	Metastasis	55	0.97872	15	0	NA	NA	NA
P-0009345	Wild	Female	23	0:LIVING	50-60	Anti-PD-1/PD-L1+CTLA-4	P-0009345-T01-IM5	Melanoma	Primary	55	1.95744	23	0	NA	NA	NA
P-0014206	Wild	Male	17	0:LIVING	50-60	Anti-PD-1/PD-L1+CTLA-4	P-0014206-T01-IM6	Melanoma	Metastasis	55	22.4822	17	0	NA	NA	NA
P-0003728	XMut	Male	34	0:LIVING	50-60	Anti-PD-1/PD-L1+CTLA-4	P-0003728-T01-IM5	Melanoma	Metastasis	56	47.9573	34	0	NA	NA	NA
P-0001029	Wild	Male	30	1:DECEASED	50-60	Anti-CTLA-4	P-0001029-T01-IM3	Melanoma	Metastasis	56	2.21831	30	1	NA	NA	NA
P-0003372	Wild	Female	33	0:LIVING	50-60	Anti-PD-1/PD-L1+CTLA-4	P-0003372-T01-IM5	Melanoma	Metastasis	56	3.91488	33	0	NA	NA	NA
P-0003872	Wild	Female	65	0:LIVING	50-60	Anti-CTLA-4	P-0003872-T01-IM5	Melanoma	Metastasis	56	19.5744	65	0	NA	NA	NA
P-0004048	Wild	Male	41	1:DECEASED	50-60	Anti-PD-1/PD-L1	P-0004048-T01-IM5	Melanoma	Metastasis	56	0.97872	41	1	NA	NA	NA
P-0004933	Wild	Male	33	0:LIVING	50-60	Anti-PD-1/PD-L1+CTLA-4	P-0004933-T01-IM5	Melanoma	Metastasis	56	14.6808	33	0	NA	NA	NA
P-0008997	Wild	Female	23	0:LIVING	50-60	Anti-PD-1/PD-L1+CTLA-4	P-0008997-T01-IM5	Melanoma	Metastasis	56	63.6168	23	0	NA	NA	NA
P-0009072	Wild	Male	24	0:LIVING	50-60	Anti-PD-1/PD-L1+CTLA-4	P-0009072-T01-IM5	Melanoma	Metastasis	56	3.91488	24	0	NA	NA	NA
P-0009177	Wild	Female	8	1:DECEASED	50-60	Anti-PD-1/PD-L1+CTLA-4	P-0009177-T01-IM5	Melanoma	Metastasis	56	5.87232	8	1	NA	NA	NA
P-0010737	Wild	Male	22	1:DECEASED	50-60	Anti-CTLA-4	P-0010737-T01-IM5	Melanoma	Metastasis	56	2.93616	22	1	NA	NA	NA
P-0015717	Wild	Male	18	0:LIVING	50-60	Anti-PD-1/PD-L1+CTLA-4	P-0015717-T01-IM6	Melanoma	Primary	56	1.7294	18	0	NA	NA	NA
P-0008728	XMut	Female	25	0:LIVING	50-60	Anti-PD-1/PD-L1+CTLA-4	P-0008728-T01-IM5	Melanoma	Metastasis	57	44.0424	25	0	NA	NA	NA
P-0005053	Wild	Male	36	0:LIVING	50-60	Anti-PD-1/PD-L1+CTLA-4	P-0005053-T01-IM5	Melanoma	Metastasis	57	11.7446	36	0	NA	NA	NA
P-0005121	Wild	Female	11	0:LIVING	50-60	Anti-PD-1/PD-L1	P-0005121-T02-IM5	Melanoma	Metastasis	57	2.93616	11	0	NA	NA	NA
P-0007232	Wild	Male	10	0:LIVING	50-60	Anti-PD-1/PD-L1	P-0007232-T01-IM5	Melanoma	Metastasis	57	0	10	0	NA	NA	NA
P-0012966	Wild	Female	12	1:DECEASED	50-60	Anti-PD-1/PD-L1	P-0012966-T01-IM5	Melanoma	Primary	57	2.93616	12	1	NA	NA	NA
P-0013343	Wild	Female	60	1:DECEASED	50-60	Anti-CTLA-4	P-0013343-T01-IM5	Melanoma	Metastasis	57	19.5744	60	1	NA	NA	NA
P-0009950	XMut	Male	24	0:LIVING	50-60	Anti-PD-1/PD-L1+CTLA-4	P-0009950-T01-IM5	Melanoma	Metastasis	58	69.4891	24	0	NA	NA	NA
P-0004832	Wild	Male	29	1:DECEASED	50-60	Anti-CTLA-4	P-0004832-T01-IM5	Melanoma	Metastasis	58	1.95744	29	1	NA	NA	NA
P-0009648	Wild	Male	15	1:DECEASED	50-60	Anti-PD-1/PD-L1	P-0009648-T01-IM5	Melanoma	Primary	58	0.97872	15	1	NA	NA	NA
P-0012856	Wild	Male	18	0:LIVING	50-60	Anti-PD-1/PD-L1	P-0012856-T01-IM5	Melanoma	Metastasis	58	38.1701	18	0	NA	NA	NA
P-0013451	Wild	Female	17	0:LIVING	50-60	Anti-PD-1/PD-L1+CTLA-4	P-0013451-T01-IM5	Melanoma	Metastasis	58	2.93616	17	0	NA	NA	NA
P-0013596	Wild	Male	8	1:DECEASED	50-60	Anti-PD-1/PD-L1	P-0013596-T01-IM5	Melanoma	Primary	58	9.7872	8	1	NA	NA	NA
P-0004253	Wild	Male	42	1:DECEASED	50-60	Anti-CTLA-4	P-0004253-T01-IM5	Melanoma	Metastasis	59	8.80848	42	1	NA	NA	NA
P-0004700	Wild	Male	32	1:DECEASED	50-60	Anti-PD-1/PD-L1	P-0004700-T01-IM5	Melanoma	Metastasis	59	0	32	1	NA	NA	NA
P-0005062	Wild	Female	31	0:LIVING	50-60	Anti-PD-1/PD-L1+CTLA-4	P-0005062-T01-IM5	Melanoma	Metastasis	59	0.97872	31	0	NA	NA	NA
P-0006109	Wild	Female	5	0:LIVING	50-60	Anti-CTLA-4	P-0006109-T01-IM5	Melanoma	Metastasis	59	0.97872	5	0	NA	NA	NA
P-0010847	Wild	Male	22	0:LIVING	50-60	Anti-PD-1/PD-L1	P-0010847-T01-IM5	Melanoma	Primary	59	19.5744	22	0	NA	NA	NA
P-0012080	Wild	Male	21	0:LIVING	50-60	Anti-CTLA-4	P-0012080-T01-IM5	Melanoma	Metastasis	59	24.468	21	0	NA	NA	NA
P-0001669	Wild	Male	5	1:DECEASED	50-60	Anti-CTLA-4	P-0001669-T01-IM3	Melanoma	Primary	60	1.10916	5	1	NA	NA	NA
P-0007142	Wild	Male	28	0:LIVING	50-60	Anti-PD-1/PD-L1	P-0007142-T01-IM5	Melanoma	Metastasis	60	4.8936	28	0	NA	NA	NA
P-0007927	Wild	Male	4	1:DECEASED	50-60	Anti-PD-1/PD-L1	P-0007927-T01-IM5	Melanoma	Primary	60	0.97872	4	1	NA	NA	NA
P-0008009	Wild	Male	24	0:LIVING	50-60	Anti-PD-1/PD-L1+CTLA-4	P-0008009-T01-IM5	Melanoma	Metastasis	60	8.80848	24	0	NA	NA	NA
P-0009292	Wild	Male	24	0:LIVING	50-60	Anti-PD-1/PD-L1	P-0009292-T01-IM5	Melanoma	Metastasis	60	7.82976	24	0	NA	NA	NA
P-0012550	Wild	Female	16	0:LIVING	50-60	Anti-PD-1/PD-L1	P-0012550-T01-IM5	Melanoma	Metastasis	60	57.7445	16	0	NA	NA	NA
P-0013025	Wild	Male	43	0:LIVING	50-60	Anti-CTLA-4	P-0013025-T01-IM5	Melanoma	Metastasis	60	12.7234	43	0	NA	NA	NA
P-0013412	Wild	Male	13	0:LIVING	50-60	Anti-PD-1/PD-L1+CTLA-4	P-0013412-T01-IM5	Melanoma	Metastasis	60	3.91488	13	0	NA	NA	NA
P-0014242	Wild	Male	18	0:LIVING	50-60	Anti-PD-1/PD-L1+CTLA-4	P-0014242-T01-IM6	Melanoma	Metastasis	60	25.0762	18	0	NA	NA	NA
P-0001603	Wild	Male	40	0:LIVING	61-70	Anti-CTLA-4	P-0001603-T01-IM3	Melanoma	Metastasis	61	22.1831	40	0	NA	NA	NA
P-0001646	Wild	Female	10	1:DECEASED	50-60	Anti-CTLA-4	P-0001646-T01-IM3	Melanoma	Metastasis	61	1.10916	10	1	NA	NA	NA
P-0003749	Wild	Male	24	0:LIVING	61-70	Anti-PD-1/PD-L1+CTLA-4	P-0003749-T01-IM5	Melanoma	Primary	61	4.8936	24	0	NA	NA	NA
P-0004686	Wild	Female	5	1:DECEASED	50-60	Anti-PD-1/PD-L1	P-0004686-T01-IM5	Melanoma	Primary	61	2.93616	5	1	NA	NA	NA
P-0005109	Wild	Male	18	0:LIVING	50-60	Anti-PD-1/PD-L1+CTLA-4	P-0005109-T01-IM5	Melanoma	Metastasis	61	16.6382	18	0	NA	NA	NA
P-0005235	Wild	Male	27	1:DECEASED	50-60	Anti-PD-1/PD-L1+CTLA-4	P-0005235-T01-IM5	Melanoma	Metastasis	61	0.97872	27	1	NA	NA	NA
P-0012551	Wild	Female	20	0:LIVING	50-60	Anti-CTLA-4	P-0012551-T01-IM5	Melanoma	Metastasis	61	10.7659	20	0	NA	NA	NA
P-0012780	Wild	Female	11	1:DECEASED	50-60	Anti-PD-1/PD-L1+CTLA-4	P-0012780-T01-IM5	Melanoma	Metastasis	61	6.85104	11	1	NA	NA	NA
P-0012968	Wild	Male	19	0:LIVING	61-70	Anti-PD-1/PD-L1+CTLA-4	P-0012968-T01-IM5	Melanoma	Metastasis	61	9.7872	19	0	NA	NA	NA
P-0014159	Wild	Male	2	1:DECEASED	50-60	Anti-PD-1/PD-L1	P-0014159-T01-IM5	Melanoma	Metastasis	61	19.5744	2	1	NA	NA	NA
P-0001841	XMut	Male	3	1:DECEASED	61-70	Anti-PD-1/PD-L1+CTLA-4	P-0001841-T01-IM3	Melanoma	Metastasis	62	7.76409	3	1	NA	NA	NA
P-0006177	Wild	Male	8	1:DECEASED	61-70	Anti-PD-1/PD-L1	P-0006177-T01-IM5	Melanoma	Metastasis	62	42.0849	8	1	NA	NA	NA
P-0006971	Wild	Male	13	1:DECEASED	61-70	Anti-CTLA-4	P-0006971-T01-IM5	Melanoma	Metastasis	62	1.95744	13	1	NA	NA	NA
P-0010614	Wild	Female	11	1:DECEASED	61-70	Anti-PD-1/PD-L1	P-0010614-T01-IM5	Melanoma	Metastasis	62	1.95744	11	1	NA	NA	NA
P-0010975	Wild	Female	0	1:DECEASED	61-70	Anti-PD-1/PD-L1	P-0010975-T01-IM5	Melanoma	Metastasis	62	4.8936	0	1	NA	NA	NA
P-0012315	Wild	Female	18	0:LIVING	61-70	Anti-PD-1/PD-L1	P-0012315-T01-IM5	Melanoma	Metastasis	62	11.7446	18	0	NA	NA	NA
P-0012783	Wild	Male	30	0:LIVING	50-60	Anti-PD-1/PD-L1+CTLA-4	P-0012783-T01-IM5	Melanoma	Primary	62	17.617	30	0	NA	NA	NA
P-0002165	Wild	Male	22	0:LIVING	61-70	Anti-PD-1/PD-L1+CTLA-4	P-0002165-T01-IM3	Melanoma	Metastasis	63	2.21831	22	0	NA	NA	NA
P-0004871	Wild	Female	44	0:LIVING	61-70	Anti-CTLA-4	P-0004871-T01-IM5	Melanoma	Primary	63	7.82976	44	0	NA	NA	NA
P-0013232	Wild	Male	11	0:LIVING	61-70	Anti-PD-1/PD-L1	P-0013232-T01-IM5	Melanoma	Metastasis	63	46.9785	11	0	NA	NA	NA
P-0013845	Wild	Male	28	0:LIVING	61-70	Anti-PD-1/PD-L1+CTLA-4	P-0013845-T01-IM5	Melanoma	Metastasis	63	1.95744	28	0	NA	NA	NA
P-0001710	Wild	Male	40	0:LIVING	61-70	Anti-CTLA-4	P-0001710-T01-IM3	Melanoma	Metastasis	64	16.6373	40	0	NA	NA	NA
P-0003703	Wild	Female	30	1:DECEASED	61-70	Anti-CTLA-4	P-0003703-T01-IM5	Melanoma	Primary	64	0.97872	30	1	NA	NA	NA
P-0005144	Wild	Male	40	1:DECEASED	50-60	Anti-CTLA-4	P-0005144-T01-IM5	Melanoma	Metastasis	64	5.87232	40	1	NA	NA	NA
P-0006339	Wild	Female	1	0:LIVING	61-70	Anti-PD-1/PD-L1	P-0006339-T01-IM5	Melanoma	Metastasis	64	63.6168	1	0	NA	NA	NA
P-0006845	Wild	Male	29	0:LIVING	61-70	Anti-PD-1/PD-L1	P-0006845-T01-IM5	Melanoma	Metastasis	64	5.87232	29	0	NA	NA	NA
P-0007061	Wild	Female	28	0:LIVING	61-70	Anti-PD-1/PD-L1+CTLA-4	P-0007061-T01-IM5	Melanoma	Metastasis	64	1.95744	28	0	NA	NA	NA
P-0009736	Wild	Male	23	0:LIVING	61-70	Anti-PD-1/PD-L1+CTLA-4	P-0009736-T01-IM5	Melanoma	Metastasis	64	13.7021	23	0	NA	NA	NA
P-0013765	Wild	Male	15	0:LIVING	61-70	Anti-PD-1/PD-L1+CTLA-4	P-0013765-T01-IM5	Melanoma	Primary	64	6.85104	15	0	NA	NA	NA
P-0001560	XMut	Male	43	0:LIVING	61-70	Anti-CTLA-4	P-0001560-T01-IM3	Melanoma	Metastasis	65	24.4014	43	0	NA	NA	NA
P-0002429	Wild	Male	7	1:DECEASED	61-70	Anti-CTLA-4	P-0002429-T01-IM3	Melanoma	Primary	65	4.43662	7	1	NA	NA	NA
P-0002914	Wild	Male	24	1:DECEASED	61-70	Anti-PD-1/PD-L1+CTLA-4	P-0002914-T01-IM3	Melanoma	Metastasis	65	24.4014	24	1	NA	NA	NA
P-0003757	Wild	Male	35	0:LIVING	61-70	Anti-PD-1/PD-L1+CTLA-4	P-0003757-T01-IM5	Melanoma	Metastasis	65	8.80848	35	0	NA	NA	NA
P-0005352	Wild	Female	30	0:LIVING	61-70	Anti-PD-1/PD-L1+CTLA-4	P-0005352-T01-IM5	Melanoma	Metastasis	65	7.82976	30	0	NA	NA	NA
P-0008659	Wild	Male	8	1:DECEASED	61-70	Anti-PD-1/PD-L1	P-0008659-T01-IM5	Melanoma	Metastasis	65	8.80848	8	1	NA	NA	NA
P-0015791	Wild	Male	58	1:DECEASED	50-60	Anti-PD-1/PD-L1	P-0015791-T01-IM6	Melanoma	Metastasis	65	6.91758	58	1	NA	NA	NA
P-0015415	XMut	Male	5	1:DECEASED	61-70	Anti-PD-1/PD-L1+CTLA-4	P-0015415-T01-IM6	Melanoma	Metastasis	66	77.8228	5	1	NA	NA	NA
P-0010249	XMut	Male	28	0:LIVING	61-70	Anti-CTLA-4	P-0010249-T01-IM5	Melanoma	Metastasis	66	19.5744	28	0	NA	NA	NA
P-0005733	Wild	Female	44	1:DECEASED	61-70	Anti-CTLA-4	P-0005733-T01-IM5	Melanoma	Metastasis	66	17.617	44	1	NA	NA	NA
P-0009074	Wild	Female	14	1:DECEASED	61-70	Anti-PD-1/PD-L1+CTLA-4	P-0009074-T01-IM5	Melanoma	Metastasis	66	2.93616	14	1	NA	NA	NA
P-0009105	Wild	Female	39	0:LIVING	61-70	Anti-CTLA-4	P-0009105-T01-IM5	Melanoma	Metastasis	66	32.2978	39	0	NA	NA	NA
P-0009435	Wild	Female	20	0:LIVING	61-70	Anti-PD-1/PD-L1	P-0009435-T01-IM5	Melanoma	Primary	66	0.97872	20	0	NA	NA	NA
P-0014966	Wild	Male	17	0:LIVING	61-70	Anti-PD-1/PD-L1	P-0014966-T01-IM6	Melanoma	Metastasis	66	5.18819	17	0	NA	NA	NA
P-0015407	Wild	Male	20	0:LIVING	61-70	Anti-PD-1/PD-L1+CTLA-4	P-0015407-T01-IM6	Melanoma	Metastasis	66	33.7232	20	0	NA	NA	NA
P-0015612	Wild	Female	15	0:LIVING	61-70	Anti-PD-1/PD-L1+CTLA-4	P-0015612-T01-IM6	Melanoma	Metastasis	66	19.8881	15	0	NA	NA	NA
P-0000895	Wild	Male	33	1:DECEASED	61-70	Anti-PD-1/PD-L1+CTLA-4	P-0000895-T01-IM3	Melanoma	Metastasis	67	6.65493	33	1	NA	NA	NA
P-0002504	Wild	Male	28	1:DECEASED	61-70	Anti-CTLA-4	P-0002504-T01-IM3	Melanoma	Metastasis	67	36.6021	28	1	NA	NA	NA
P-0003560	Wild	Male	41	0:LIVING	61-70	Anti-CTLA-4	P-0003560-T01-IM5	Melanoma	Metastasis	67	45.0211	41	0	NA	NA	NA
P-0003881	Wild	Male	26	0:LIVING	61-70	Anti-PD-1/PD-L1+CTLA-4	P-0003881-T01-IM5	Melanoma	Metastasis	67	4.8936	26	0	NA	NA	NA
P-0004142	Wild	Female	35	0:LIVING	61-70	Anti-CTLA-4	P-0004142-T01-IM5	Melanoma	Metastasis	67	22.5106	35	0	NA	NA	NA
P-0004518	Wild	Female	38	0:LIVING	61-70	Anti-CTLA-4	P-0004518-T01-IM5	Melanoma	Metastasis	67	24.468	38	0	NA	NA	NA
P-0006773	Wild	Female	9	1:DECEASED	61-70	Anti-PD-1/PD-L1	P-0006773-T01-IM5	Melanoma	Primary	67	4.8936	9	1	NA	NA	NA
P-0008490	Wild	Female	24	0:LIVING	61-70	Anti-PD-1/PD-L1	P-0008490-T01-IM5	Melanoma	Metastasis	67	5.87232	24	0	NA	NA	NA
P-0010008	Wild	Male	2	1:DECEASED	61-70	Anti-PD-1/PD-L1+CTLA-4	P-0010008-T01-IM5	Melanoma	Metastasis	67	4.8936	2	1	NA	NA	NA
P-0013274	Wild	Male	13	1:DECEASED	61-70	Anti-PD-1/PD-L1	P-0013274-T01-IM5	Melanoma	Metastasis	67	6.85104	13	1	NA	NA	NA
P-0013318	Wild	Male	18	0:LIVING	61-70	Anti-PD-1/PD-L1	P-0013318-T01-IM5	Melanoma	Metastasis	67	6.85104	18	0	NA	NA	NA
P-0014449	Wild	Male	11	1:DECEASED	61-70	Anti-PD-1/PD-L1+CTLA-4	P-0014449-T01-IM6	Melanoma	Metastasis	67	1.7294	11	1	NA	NA	NA
P-0015989	Wild	Male	14	0:LIVING	61-70	Anti-PD-1/PD-L1	P-0015989-T01-IM6	Melanoma	Metastasis	67	2.59409	14	0	NA	NA	NA
P-0016531	Wild	Male	14	0:LIVING	61-70	Anti-PD-1/PD-L1+CTLA-4	P-0016531-T01-IM6	Melanoma	Primary	67	3.45879	14	0	NA	NA	NA
P-0003899	Wild	Male	3	0:LIVING	61-70	Anti-PD-1/PD-L1	P-0003899-T01-IM5	Melanoma	Metastasis	68	1.95744	3	0	NA	NA	NA
P-0004527	Wild	Female	47	1:DECEASED	61-70	Anti-CTLA-4	P-0004527-T01-IM5	Melanoma	Metastasis	68	5.87232	47	1	NA	NA	NA
P-0005928	Wild	Male	29	0:LIVING	61-70	Anti-PD-1/PD-L1	P-0005928-T01-IM5	Melanoma	Metastasis	68	17.617	29	0	NA	NA	NA
P-0008942	Wild	Male	25	0:LIVING	61-70	Anti-PD-1/PD-L1+CTLA-4	P-0008942-T01-IM5	Melanoma	Metastasis	68	33.2765	25	0	NA	NA	NA
P-0009019	Wild	Male	13	1:DECEASED	61-70	Anti-PD-1/PD-L1	P-0009019-T01-IM5	Melanoma	Metastasis	68	2.93616	13	1	NA	NA	NA
P-0009106	Wild	Female	31	0:LIVING	61-70	Anti-PD-1/PD-L1+CTLA-4	P-0009106-T01-IM5	Melanoma	Metastasis	68	12.7234	31	0	NA	NA	NA
P-0009831	Wild	Female	15	1:DECEASED	61-70	Anti-PD-1/PD-L1	P-0009831-T01-IM5	Melanoma	Metastasis	68	1.95744	15	1	NA	NA	NA
P-0015257	Wild	Female	14	0:LIVING	61-70	Anti-PD-1/PD-L1	P-0015257-T01-IM6	Melanoma	Primary	68	58.7995	14	0	NA	NA	NA
P-0016697	Wild	Female	14	0:LIVING	61-70	Anti-PD-1/PD-L1	P-0016697-T01-IM6	Melanoma	Metastasis	68	0.864698	14	0	NA	NA	NA
P-0009108	XMut	Male	20	0:LIVING	61-70	Anti-PD-1/PD-L1+CTLA-4	P-0009108-T01-IM5	Melanoma	Metastasis	69	38.1701	20	0	NA	NA	NA
P-0001679	Wild	Male	4	1:DECEASED	61-70	Anti-CTLA-4	P-0001679-T01-IM3	Melanoma	Metastasis	69	5.54578	4	1	NA	NA	NA
P-0003255	Wild	Male	2	1:DECEASED	61-70	Anti-PD-1/PD-L1+CTLA-4	P-0003255-T01-IM5	Melanoma	Metastasis	69	9.7872	2	1	NA	NA	NA
P-0013200	Wild	Female	19	0:LIVING	61-70	Anti-PD-1/PD-L1+CTLA-4	P-0013200-T01-IM5	Melanoma	Primary	69	1.95744	19	0	NA	NA	NA
P-0013389	Wild	Male	18	0:LIVING	61-70	Anti-PD-1/PD-L1	P-0013389-T01-IM5	Melanoma	Metastasis	69	5.87232	18	0	NA	NA	NA
P-0013525	Wild	Female	19	0:LIVING	61-70	Anti-CTLA-4	P-0013525-T01-IM5	Melanoma	Metastasis	69	9.7872	19	0	NA	NA	NA
P-0015697	Wild	Female	14	0:LIVING	61-70	Anti-PD-1/PD-L1	P-0015697-T01-IM6	Melanoma	Metastasis	69	18.1587	14	0	NA	NA	NA
P-0000968	Wild	Male	48	0:LIVING	61-70	Anti-PD-1/PD-L1+CTLA-4	P-0000968-T01-IM3	Melanoma	Metastasis	70	3.32747	48	0	NA	NA	NA
P-0007810	Wild	Male	27	0:LIVING	61-70	Anti-PD-1/PD-L1	P-0007810-T02-IM5	Melanoma	Metastasis	70	42.0849	27	0	NA	NA	NA
P-0008784	Wild	Female	8	1:DECEASED	61-70	Anti-PD-1/PD-L1	P-0008784-T02-IM5	Melanoma	Metastasis	70	8.80848	8	1	NA	NA	NA
P-0010915	Wild	Female	13	1:DECEASED	61-70	Anti-PD-1/PD-L1	P-0010915-T01-IM5	Melanoma	Primary	70	18.5957	13	1	NA	NA	NA
P-0012282	Wild	Male	17	0:LIVING	61-70	Anti-CTLA-4	P-0012282-T01-IM5	Melanoma	Primary	70	9.7872	17	0	NA	NA	NA
P-0013111	Wild	Male	20	0:LIVING	61-70	Anti-PD-1/PD-L1	P-0013111-T01-IM5	Melanoma	Metastasis	70	19.5744	20	0	NA	NA	NA
P-0015471	Wild	Male	13	0:LIVING	61-70	Anti-PD-1/PD-L1	P-0015471-T01-IM6	Melanoma	Metastasis	70	1.7294	13	0	NA	NA	NA
P-0014910	XMut	Male	20	0:LIVING	>71	Anti-PD-1/PD-L1	P-0014910-T01-IM6	Melanoma	Metastasis	71	32.8585	20	0	NA	NA	NA
P-0000596	Wild	Male	42	0:LIVING	61-70	Anti-CTLA-4	P-0000596-T01-IM3	Melanoma	Metastasis	71	42.1479	42	0	NA	NA	NA
P-0001485	Wild	Male	7	1:DECEASED	>71	Anti-CTLA-4	P-0001485-T01-IM3	Melanoma	Metastasis	71	74.3134	7	1	NA	NA	NA
P-0002182	Wild	Female	22	1:DECEASED	61-70	Anti-PD-1/PD-L1+CTLA-4	P-0002182-T01-IM3	Melanoma	Metastasis	71	0	22	1	NA	NA	NA
P-0002706	Wild	Female	32	1:DECEASED	61-70	Anti-CTLA-4	P-0002706-T01-IM3	Melanoma	Metastasis	71	17.7465	32	1	NA	NA	NA
P-0003743	Wild	Male	51	0:LIVING	61-70	Anti-PD-1/PD-L1+CTLA-4	P-0003743-T01-IM5	Melanoma	Metastasis	71	8.80848	51	0	NA	NA	NA
P-0005725	Wild	Male	13	0:LIVING	61-70	Anti-PD-1/PD-L1	P-0005725-T01-IM5	Melanoma	Metastasis	71	25.4467	13	0	NA	NA	NA
P-0007918	Wild	Male	1	1:DECEASED	61-70	Anti-PD-1/PD-L1+CTLA-4	P-0007918-T01-IM5	Melanoma	Metastasis	71	55.787	1	1	NA	NA	NA
P-0009497	Wild	Male	56	0:LIVING	61-70	Anti-CTLA-4	P-0009497-T01-IM5	Melanoma	Primary	71	2.93616	56	0	NA	NA	NA
P-0010495	Wild	Female	2	1:DECEASED	61-70	Anti-PD-1/PD-L1	P-0010495-T01-IM5	Melanoma	Metastasis	71	3.91488	2	1	NA	NA	NA
P-0010670	Wild	Male	13	0:LIVING	>71	Anti-PD-1/PD-L1+CTLA-4	P-0010670-T01-IM5	Melanoma	Metastasis	71	12.7234	13	0	NA	NA	NA
P-0012361	Wild	Male	16	1:DECEASED	>71	Anti-PD-1/PD-L1	P-0012361-T01-IM5	Melanoma	Metastasis	71	45.0211	16	1	NA	NA	NA
P-0012999	Wild	Male	13	1:DECEASED	61-70	Anti-PD-1/PD-L1+CTLA-4	P-0012999-T01-IM5	Melanoma	Metastasis	71	20.5531	13	1	NA	NA	NA
P-0005421	XMut	Male	32	0:LIVING	>71	Anti-PD-1/PD-L1	P-0005421-T01-IM5	Melanoma	Primary	72	14.6808	32	0	NA	NA	NA
P-0002490	Wild	Male	41	1:DECEASED	61-70	Anti-PD-1/PD-L1+CTLA-4	P-0002490-T01-IM3	Melanoma	Metastasis	72	124.225	41	1	NA	NA	NA
P-0004349	Wild	Female	35	0:LIVING	>71	Anti-PD-1/PD-L1	P-0004349-T01-IM5	Melanoma	Metastasis	72	5.87232	35	0	NA	NA	NA
P-0005180	Wild	Male	11	1:DECEASED	>71	Anti-PD-1/PD-L1	P-0005180-T01-IM5	Melanoma	Primary	72	1.95744	11	1	NA	NA	NA
P-0007235	Wild	Female	9	1:DECEASED	>71	Anti-PD-1/PD-L1+CTLA-4	P-0007235-T01-IM5	Melanoma	Primary	72	8.80848	9	1	NA	NA	NA
P-0007876	Wild	Female	12	0:LIVING	>71	Anti-PD-1/PD-L1	P-0007876-T01-IM5	Melanoma	Metastasis	72	36.2126	12	0	NA	NA	NA
P-0008733	Wild	Male	12	1:DECEASED	61-70	Anti-PD-1/PD-L1	P-0008733-T01-IM5	Melanoma	Metastasis	72	7.82976	12	1	NA	NA	NA
P-0009944	Wild	Female	23	0:LIVING	>71	Anti-PD-1/PD-L1+CTLA-4	P-0009944-T01-IM5	Melanoma	Metastasis	72	1.95744	23	0	NA	NA	NA
P-0001361	Wild	Male	42	1:DECEASED	61-70	Anti-CTLA-4	P-0001361-T01-IM3	Melanoma	Metastasis	73	34.3838	42	1	NA	NA	NA
P-0003700	Wild	Male	36	0:LIVING	>71	Anti-PD-1/PD-L1+CTLA-4	P-0003700-T01-IM5	Melanoma	Metastasis	73	2.93616	36	0	NA	NA	NA
P-0006467	Wild	Male	29	0:LIVING	>71	Anti-PD-1/PD-L1+CTLA-4	P-0006467-T01-IM5	Melanoma	Metastasis	73	2.93616	29	0	NA	NA	NA
P-0006488	Wild	Female	50	0:LIVING	61-70	Anti-PD-1/PD-L1+CTLA-4	P-0006488-T01-IM5	Melanoma	Metastasis	73	7.82976	50	0	NA	NA	NA
P-0007517	Wild	Male	4	1:DECEASED	>71	Anti-PD-1/PD-L1+CTLA-4	P-0007517-T01-IM5	Melanoma	Metastasis	73	6.85104	4	1	NA	NA	NA
P-0009311	Wild	Female	7	1:DECEASED	>71	Anti-PD-1/PD-L1+CTLA-4	P-0009311-T01-IM5	Melanoma	Metastasis	73	31.319	7	1	NA	NA	NA
P-0012420	Wild	Male	19	0:LIVING	>71	Anti-PD-1/PD-L1	P-0012420-T01-IM5	Melanoma	Metastasis	73	10.7659	19	0	NA	NA	NA
P-0015438	Wild	Male	15	0:LIVING	>71	Anti-PD-1/PD-L1+CTLA-4	P-0015438-T01-IM6	Melanoma	Metastasis	73	66.5818	15	0	NA	NA	NA
P-0016177	Wild	Male	15	0:LIVING	>71	Anti-PD-1/PD-L1	P-0016177-T01-IM6	Melanoma	Metastasis	73	4.32349	15	0	NA	NA	NA
P-0008857	XMut	Female	24	0:LIVING	>71	Anti-PD-1/PD-L1	P-0008857-T01-IM5	Melanoma	Metastasis	74	49.9147	24	0	NA	NA	NA
P-0006034	XMut	Male	30	0:LIVING	>71	Anti-PD-1/PD-L1+CTLA-4	P-0006034-T01-IM5	Melanoma	Metastasis	74	43.0637	30	0	NA	NA	NA
P-0005366	XMut	Male	13	1:DECEASED	>71	Anti-PD-1/PD-L1	P-0005366-T01-IM5	Melanoma	Metastasis	74	147.787	13	1	NA	NA	NA
P-0001756	Wild	Male	40	0:LIVING	>71	Anti-CTLA-4	P-0001756-T01-IM3	Melanoma	Primary	74	44.3662	40	0	NA	NA	NA
P-0002456	Wild	Female	1	1:DECEASED	>71	Anti-CTLA-4	P-0002456-T01-IM3	Melanoma	Primary	74	7.76409	1	1	NA	NA	NA
P-0002517	Wild	Male	19	1:DECEASED	>71	Anti-CTLA-4	P-0002517-T01-IM3	Melanoma	Metastasis	74	2.21831	19	1	NA	NA	NA
P-0005655	Wild	Female	23	0:LIVING	>71	Anti-PD-1/PD-L1	P-0005655-T01-IM5	Melanoma	Primary	74	3.91488	23	0	NA	NA	NA
P-0003069	XMut	Female	7	1:DECEASED	>71	Anti-CTLA-4	P-0003069-T01-IM5	Melanoma	Metastasis	75	34.2552	7	1	NA	NA	NA
P-0000697	Wild	Female	32	1:DECEASED	>71	Anti-PD-1/PD-L1+CTLA-4	P-0000697-T01-IM3	Melanoma	Metastasis	75	7.76409	32	1	NA	NA	NA
P-0015122	Wild	Female	2	0:LIVING	>71	Anti-PD-1/PD-L1	P-0015122-T01-IM6	Melanoma	Primary	75	9.51168	2	0	NA	NA	NA
P-0002422	Wild	Female	6	1:DECEASED	>71	Anti-PD-1/PD-L1	P-0002422-T01-IM3	Melanoma	Primary	76	2.21831	6	1	NA	NA	NA
P-0005118	Wild	Male	28	0:LIVING	>71	Anti-PD-1/PD-L1+CTLA-4	P-0005118-T01-IM5	Melanoma	Metastasis	76	16.6382	28	0	NA	NA	NA
P-0005228	Wild	Male	39	0:LIVING	>71	Anti-PD-1/PD-L1	P-0005228-T01-IM5	Melanoma	Metastasis	76	91.9997	39	0	NA	NA	NA
P-0008870	Wild	Female	19	0:LIVING	>71	Anti-PD-1/PD-L1	P-0008870-T01-IM5	Melanoma	Metastasis	76	0.97872	19	0	NA	NA	NA
P-0013413	Wild	Male	14	1:DECEASED	>71	Anti-CTLA-4	P-0013413-T01-IM5	Melanoma	Metastasis	76	24.468	14	1	NA	NA	NA
P-0008080	XMut	Male	39	0:LIVING	>71	Anti-CTLA-4	P-0008080-T01-IM5	Melanoma	Metastasis	77	46.9785	39	0	NA	NA	NA
P-0001174	Wild	Female	70	0:LIVING	>71	Anti-CTLA-4	P-0001174-T01-IM3	Melanoma	Metastasis	77	1.10916	70	0	NA	NA	NA
P-0004272	Wild	Male	3	1:DECEASED	>71	Anti-PD-1/PD-L1	P-0004272-T01-IM5	Melanoma	Metastasis	77	9.7872	3	1	NA	NA	NA
P-0005260	Wild	Female	13	0:LIVING	>71	Anti-PD-1/PD-L1	P-0005260-T01-IM5	Melanoma	Primary	77	11.7446	13	0	NA	NA	NA
P-0012822	Wild	Female	2	1:DECEASED	>71	Anti-PD-1/PD-L1+CTLA-4	P-0012822-T01-IM5	Melanoma	Metastasis	77	0	2	1	NA	NA	NA
P-0000686	XMut	Male	80	0:LIVING	>71	Anti-CTLA-4	P-0000686-T01-IM3	Melanoma	Metastasis	78	179.683	80	0	NA	NA	NA
P-0002993	Wild	Male	59	1:DECEASED	>71	Anti-CTLA-4	P-0002993-T01-IM3	Melanoma	Metastasis	78	4.43662	59	1	NA	NA	NA
P-0005039	Wild	Female	1	1:DECEASED	>71	Anti-PD-1/PD-L1+CTLA-4	P-0005039-T01-IM5	Melanoma	Metastasis	78	28.3829	1	1	NA	NA	NA
P-0005146	Wild	Female	32	0:LIVING	>71	Anti-PD-1/PD-L1	P-0005146-T01-IM5	Melanoma	Metastasis	78	8.80848	32	0	NA	NA	NA
P-0013854	Wild	Male	33	1:DECEASED	>71	Anti-PD-1/PD-L1+CTLA-4	P-0013854-T01-IM5	Melanoma	Metastasis	78	5.87232	33	1	NA	NA	NA
P-0014137	Wild	Male	9	0:LIVING	>71	Anti-PD-1/PD-L1	P-0014137-T01-IM5	Melanoma	Primary	78	24.468	9	0	NA	NA	NA
P-0014236	Wild	Male	17	0:LIVING	>71	Anti-PD-1/PD-L1+CTLA-4	P-0014236-T01-IM6	Melanoma	Primary	78	1.7294	17	0	NA	NA	NA
P-0000646	Wild	Male	77	0:LIVING	>71	Anti-CTLA-4	P-0000646-T02-IM3	Melanoma	Metastasis	79	41.0387	77	0	NA	NA	NA
P-0010937	Wild	Male	12	1:DECEASED	>71	Anti-CTLA-4	P-0010937-T01-IM5	Melanoma	Metastasis	79	36.2126	12	1	NA	NA	NA
P-0013313	Wild	Male	11	1:DECEASED	>71	Anti-PD-1/PD-L1	P-0013313-T01-IM5	Melanoma	Metastasis	79	5.87232	11	1	NA	NA	NA
P-0002019	Wild	Male	7	0:LIVING	>71	Anti-PD-1/PD-L1	P-0002019-T01-IM3	Melanoma	Metastasis	80	1.10916	7	0	NA	NA	NA
P-0002305	Wild	Male	14	0:LIVING	>71	Anti-CTLA-4	P-0002305-T01-IM3	Melanoma	Metastasis	80	9.9824	14	0	NA	NA	NA
P-0008228	Wild	Male	28	0:LIVING	>71	Anti-PD-1/PD-L1	P-0008228-T01-IM5	Melanoma	Metastasis	80	43.0637	28	0	NA	NA	NA
P-0009189	XMut	Male	24	0:LIVING	>71	Anti-PD-1/PD-L1+CTLA-4	P-0009189-T01-IM5	Melanoma	Metastasis	81	66.5529	24	0	NA	NA	NA
P-0002157	Wild	Female	0	0:LIVING	>71	Anti-PD-1/PD-L1	P-0002157-T01-IM3	Melanoma	Metastasis	81	23.2923	0	0	NA	NA	NA
P-0006121	Wild	Female	50	0:LIVING	>71	Anti-CTLA-4	P-0006121-T01-IM5	Melanoma	Metastasis	81	2.93616	50	0	NA	NA	NA
P-0006541	Wild	Male	47	1:DECEASED	>71	Anti-PD-1/PD-L1	P-0006541-T01-IM5	Melanoma	Metastasis	81	33.2765	47	1	NA	NA	NA
P-0011047	Wild	Female	18	0:LIVING	>71	Anti-PD-1/PD-L1	P-0011047-T01-IM5	Melanoma	Metastasis	81	35.2339	18	0	NA	NA	NA
P-0013659	Wild	Male	17	0:LIVING	>71	Anti-PD-1/PD-L1	P-0013659-T01-IM5	Melanoma	Primary	81	9.7872	17	0	NA	NA	NA
P-0013951	Wild	Male	10	1:DECEASED	>71	Anti-PD-1/PD-L1+CTLA-4	P-0013951-T01-IM5	Melanoma	Metastasis	81	1.95744	10	1	NA	NA	NA
P-0003225	Wild	Female	37	0:LIVING	>71	Anti-PD-1/PD-L1+CTLA-4	P-0003225-T01-IM5	Melanoma	Metastasis	82	7.82976	37	0	NA	NA	NA
P-0003359	Wild	Male	1	1:DECEASED	>71	Anti-PD-1/PD-L1	P-0003359-T01-IM5	Melanoma	Metastasis	82	2.93616	1	1	NA	NA	NA
P-0004437	Wild	Female	35	0:LIVING	>71	Anti-PD-1/PD-L1+CTLA-4	P-0004437-T01-IM5	Melanoma	Primary	82	13.7021	35	0	NA	NA	NA
P-0006193	Wild	Female	2	1:DECEASED	>71	Anti-PD-1/PD-L1+CTLA-4	P-0006193-T01-IM5	Melanoma	Metastasis	82	8.80848	2	1	NA	NA	NA
P-0007281	Wild	Male	6	1:DECEASED	>71	Anti-PD-1/PD-L1	P-0007281-T01-IM5	Melanoma	Metastasis	82	11.7446	6	1	NA	NA	NA
P-0009747	Wild	Male	19	1:DECEASED	>71	Anti-PD-1/PD-L1	P-0009747-T01-IM5	Melanoma	Primary	82	24.468	19	1	NA	NA	NA
P-0015830	XMut	Male	14	0:LIVING	>71	Anti-PD-1/PD-L1	P-0015830-T01-IM6	Melanoma	Metastasis	83	50.1525	14	0	NA	NA	NA
P-0006155	XMut	Male	4	0:LIVING	>71	Anti-PD-1/PD-L1	P-0006155-T02-IM5	Melanoma	Metastasis	83	71.4465	4	0	NA	NA	NA
P-0013448	XMut	Male	19	0:LIVING	>71	Anti-PD-1/PD-L1	P-0013448-T01-IM5	Melanoma	Metastasis	83	12.7234	19	0	NA	NA	NA
P-0004457	Wild	Female	11	1:DECEASED	>71	Anti-PD-1/PD-L1	P-0004457-T01-IM5	Melanoma	Metastasis	83	38.1701	11	1	NA	NA	NA
P-0005159	Wild	Male	27	1:DECEASED	>71	Anti-PD-1/PD-L1	P-0005159-T01-IM5	Melanoma	Primary	83	99.8294	27	1	NA	NA	NA
P-0012408	Wild	Male	17	0:LIVING	>71	Anti-PD-1/PD-L1	P-0012408-T01-IM5	Melanoma	Metastasis	83	14.6808	17	0	NA	NA	NA
P-0013309	Wild	Female	19	0:LIVING	>71	Anti-PD-1/PD-L1+CTLA-4	P-0013309-T01-IM5	Melanoma	Primary	83	0.97872	19	0	NA	NA	NA
P-0014556	Wild	Male	5	1:DECEASED	>71	Anti-PD-1/PD-L1	P-0014556-T01-IM6	Melanoma	Metastasis	83	16.4293	5	1	NA	NA	NA
P-0014682	Wild	Male	16	0:LIVING	>71	Anti-PD-1/PD-L1	P-0014682-T01-IM6	Melanoma	Metastasis	83	0.864698	16	0	NA	NA	NA
P-0015182	Wild	Male	17	0:LIVING	>71	Anti-PD-1/PD-L1	P-0015182-T01-IM6	Melanoma	Primary	83	3.45879	17	0	NA	NA	NA
P-0016197	Wild	Male	3	1:DECEASED	>71	Anti-PD-1/PD-L1	P-0016197-T01-IM6	Melanoma	Metastasis	83	26.8056	3	1	NA	NA	NA
P-0004214	XMut	Male	31	1:DECEASED	>71	Anti-PD-1/PD-L1	P-0004214-T01-IM5	Melanoma	Metastasis	84	33.2765	31	1	NA	NA	NA
P-0003871	Wild	Male	4	0:LIVING	>71	Anti-PD-1/PD-L1	P-0003871-T01-IM5	Melanoma	Metastasis	84	88.0848	4	0	NA	NA	NA
P-0013383	Wild	Female	17	0:LIVING	>71	Anti-PD-1/PD-L1+CTLA-4	P-0013383-T01-IM5	Melanoma	Metastasis	84	45.9998	17	0	NA	NA	NA
P-0012860	XMut	Male	10	0:LIVING	>71	Anti-PD-1/PD-L1	P-0012860-T01-IM5	Melanoma	Metastasis	85	93.9571	10	0	NA	NA	NA
P-0004815	Wild	Male	2	1:DECEASED	>71	Anti-PD-1/PD-L1	P-0004815-T01-IM5	Melanoma	Metastasis	85	3.91488	2	1	NA	NA	NA
P-0007293	Wild	Female	29	0:LIVING	>71	Anti-PD-1/PD-L1	P-0007293-T01-IM5	Melanoma	Metastasis	85	5.87232	29	0	NA	NA	NA
P-0010818	Wild	Male	10	1:DECEASED	>71	Anti-PD-1/PD-L1	P-0010818-T01-IM5	Melanoma	Metastasis	85	15.6595	10	1	NA	NA	NA
P-0015010	Wild	Male	13	0:LIVING	>71	Anti-PD-1/PD-L1	P-0015010-T01-IM6	Melanoma	Primary	85	1.7294	13	0	NA	NA	NA
P-0015512	Wild	Male	16	0:LIVING	>71	Anti-PD-1/PD-L1	P-0015512-T01-IM6	Melanoma	Primary	85	96.8462	16	0	NA	NA	NA
P-0001892	Wild	Male	4	1:DECEASED	>71	Anti-CTLA-4	P-0001892-T01-IM3	Melanoma	Primary	86	4.43662	4	1	NA	NA	NA
P-0008974	Wild	Male	4	1:DECEASED	>71	Anti-PD-1/PD-L1	P-0008974-T01-IM5	Melanoma	Metastasis	86	34.2552	4	1	NA	NA	NA
P-0016276	Wild	Female	12	0:LIVING	>71	Anti-PD-1/PD-L1	P-0016276-T01-IM6	Melanoma	Primary	86	6.91758	12	0	NA	NA	NA
P-0008946	Wild	Female	23	0:LIVING	>71	Anti-PD-1/PD-L1	P-0008946-T01-IM5	Melanoma	Metastasis	87	15.6595	23	0	NA	NA	NA
P-0009324	Wild	Male	21	0:LIVING	>71	Anti-PD-1/PD-L1	P-0009324-T02-IM5	Melanoma	Metastasis	87	22.5106	21	0	NA	NA	NA
P-0016648	Wild	Male	14	0:LIVING	>71	Anti-PD-1/PD-L1	P-0016648-T01-IM6	Melanoma	Metastasis	87	1.7294	14	0	NA	NA	NA
P-0009245	Wild	Male	11	1:DECEASED	>71	Anti-PD-1/PD-L1	P-0009245-T01-IM5	Melanoma	Metastasis	88	23.4893	11	1	NA	NA	NA
P-0009349	Wild	Female	21	0:LIVING	>71	Anti-PD-1/PD-L1	P-0009349-T01-IM5	Melanoma	Metastasis	88	34.2552	21	0	NA	NA	NA
P-0005129	XMut	Female	11	1:DECEASED	>71	Anti-PD-1/PD-L1	P-0005129-T01-IM5	Melanoma	Metastasis	90	8.80848	11	1	NA	NA	NA
P-0013826	XMut	Male	1	0:LIVING	>71	Anti-PD-1/PD-L1	P-0013826-T01-IM5	Melanoma	Primary	90	162.467	1	0	NA	NA	NA
P-0000893	Wild	Male	16	1:DECEASED	>71	Anti-CTLA-4	P-0000893-T01-IM3	Melanoma	Metastasis	90	6.65493	16	1	NA	NA	NA
P-0006719	Wild	Female	28	0:LIVING	>71	Anti-PD-1/PD-L1	P-0006719-T01-IM5	Melanoma	Metastasis	90	38.1701	28	0	NA	NA	NA
P-0016287	Wild	Male	11	1:DECEASED	>71	Anti-PD-1/PD-L1	P-0016287-T01-IM6	Melanoma	Metastasis	90	5.18819	11	1	NA	NA	NA
P-0001955	Wild	Female	6	1:DECEASED	31-50	Anti-PD-1/PD-L1	P-0001955-T01-IM3	Non-Small Cell Lung Cancer	Metastasis	31	2.21831	6	1	NA	1	PD
P-0002738	Wild	Female	1	1:DECEASED	31-50	Anti-PD-1/PD-L1	P-0002738-T01-IM3	Non-Small Cell Lung Cancer	Metastasis	32	7.76409	1	1	NA	NA	NA
P-0009469	Wild	Female	3	0:LIVING	31-50	Anti-PD-1/PD-L1	P-0009469-T01-IM5	Non-Small Cell Lung Cancer	Primary	32	2.93616	3	0	NA	1	PD
P-0002559	Wild	Female	43	0:LIVING	31-50	Anti-PD-1/PD-L1	P-0002559-T01-IM3	Non-Small Cell Lung Cancer	Primary	39	1.10916	43	0	NA	1	PD
P-0002890	Wild	Female	0	1:DECEASED	31-50	Anti-PD-1/PD-L1	P-0002890-T01-IM3	Non-Small Cell Lung Cancer	Metastasis	40	6.65493	0	1	NA	1	PD
P-0004495	Wild	Male	8	1:DECEASED	31-50	Anti-PD-1/PD-L1	P-0004495-T01-IM5	Non-Small Cell Lung Cancer	Primary	40	8.80848	8	1	NA	1	PD
P-0010065	Wild	Male	9	0:LIVING	31-50	Anti-PD-1/PD-L1	P-0010065-T01-IM5	Non-Small Cell Lung Cancer	Metastasis	40	1.95744	9	0	NA	0	PR
P-0000563	Wild	Male	6	1:DECEASED	31-50	Anti-PD-1/PD-L1	P-0000563-T01-IM3	Non-Small Cell Lung Cancer	Primary	42	3.32747	6	1	NA	1	PD
P-0010891	Wild	Female	2	1:DECEASED	31-50	Anti-PD-1/PD-L1+CTLA-4	P-0010891-T01-IM5	Non-Small Cell Lung Cancer	Metastasis	42	0.97872	2	1	NA	1	PD
P-0002646	Wild	Male	4	1:DECEASED	31-50	Anti-PD-1/PD-L1	P-0002646-T01-IM3	Non-Small Cell Lung Cancer	Primary	43	6.65493	4	1	NA	NA	NA
P-0001314	Wild	Female	1	1:DECEASED	31-50	Anti-PD-1/PD-L1	P-0001314-T01-IM3	Non-Small Cell Lung Cancer	Metastasis	44	2.21831	1	1	NA	NA	NA
P-0003913	Wild	Female	1	1:DECEASED	31-50	Anti-PD-1/PD-L1	P-0003913-T01-IM3	Non-Small Cell Lung Cancer	Primary	44	3.32747	1	1	NA	1	PD
P-0004103	Wild	Female	23	1:DECEASED	31-50	Anti-PD-1/PD-L1+CTLA-4	P-0004103-T01-IM5	Non-Small Cell Lung Cancer	Primary	44	0.97872	23	1	NA	NA	NA
P-0005897	Wild	Male	5	1:DECEASED	31-50	Anti-PD-1/PD-L1	P-0005897-T02-IM5	Non-Small Cell Lung Cancer	Metastasis	44	5.87232	5	1	NA	NA	NA
P-0001121	Wild	Female	10	1:DECEASED	31-50	Anti-PD-1/PD-L1	P-0001121-T01-IM3	Non-Small Cell Lung Cancer	Primary	45	1.10916	10	1	NA	1	PD
P-0002485	Wild	Male	24	1:DECEASED	31-50	Anti-PD-1/PD-L1	P-0002485-T01-IM3	Non-Small Cell Lung Cancer	Primary	45	3.32747	24	1	NA	1	SD
P-0007088	Wild	Female	32	1:DECEASED	31-50	Anti-PD-1/PD-L1	P-0007088-T02-IM5	Non-Small Cell Lung Cancer	Metastasis	45	4.8936	32	1	NA	1	PD
P-0003970	Wild	Female	12	1:DECEASED	31-50	Anti-PD-1/PD-L1	P-0003970-T01-IM5	Non-Small Cell Lung Cancer	Metastasis	46	1.95744	12	1	NA	0	PR
P-0005320	Wild	Male	17	1:DECEASED	31-50	Anti-PD-1/PD-L1	P-0005320-T01-IM5	Non-Small Cell Lung Cancer	Primary	47	7.82976	17	1	NA	1	SD
P-0005711	Wild	Male	6	1:DECEASED	31-50	Anti-PD-1/PD-L1	P-0005711-T01-IM5	Non-Small Cell Lung Cancer	Metastasis	47	2.93616	6	1	NA	NA	NA
P-0008944	Wild	Female	11	1:DECEASED	31-50	Anti-PD-1/PD-L1	P-0008944-T01-IM5	Non-Small Cell Lung Cancer	Primary	47	10.7659	11	1	NA	1	PD
P-0006724	XMut	Female	18	0:LIVING	31-50	Anti-PD-1/PD-L1	P-0006724-T01-IM5	Non-Small Cell Lung Cancer	Metastasis	48	23.4893	18	0	NA	0	PR
P-0001665	Wild	Female	5	1:DECEASED	31-50	Anti-PD-1/PD-L1	P-0001665-T01-IM3	Non-Small Cell Lung Cancer	Primary	48	1.10916	5	1	NA	1	PD
P-0006221	Wild	Female	13	1:DECEASED	31-50	Anti-PD-1/PD-L1	P-0006221-T01-IM5	Non-Small Cell Lung Cancer	Primary	48	0	13	1	NA	NA	NA
P-0003967	Wild	Female	13	0:LIVING	31-50	Anti-PD-1/PD-L1	P-0003967-T01-IM5	Non-Small Cell Lung Cancer	Metastasis	49	3.91488	13	0	NA	NA	NA
P-0005553	Wild	Male	1	1:DECEASED	31-50	Anti-PD-1/PD-L1	P-0005553-T01-IM5	Non-Small Cell Lung Cancer	Metastasis	49	4.8936	1	1	NA	NA	NA
P-0015085	Wild	Female	10	1:DECEASED	31-50	Anti-PD-1/PD-L1	P-0015085-T01-IM6	Non-Small Cell Lung Cancer	Metastasis	49	6.91758	10	1	NA	NA	NA
P-0000670	Wild	Female	17	0:LIVING	31-50	Anti-PD-1/PD-L1+CTLA-4	P-0000670-T01-IM3	Non-Small Cell Lung Cancer	Primary	50	6.65493	17	0	NA	1	SD
P-0007978	Wild	Female	6	1:DECEASED	31-50	Anti-PD-1/PD-L1	P-0007978-T01-IM5	Non-Small Cell Lung Cancer	Metastasis	50	10.7659	6	1	NA	1	PD
P-0015600	Wild	Female	13	1:DECEASED	31-50	Anti-PD-1/PD-L1	P-0015600-T01-IM6	Non-Small Cell Lung Cancer	Metastasis	50	4.32349	13	1	NA	NA	NA
P-0001385	Wild	Female	40	0:LIVING	31-50	Anti-PD-1/PD-L1+CTLA-4	P-0001385-T01-IM3	Non-Small Cell Lung Cancer	Metastasis	51	14.419	40	0	NA	0	CR
P-0002917	Wild	Female	30	0:LIVING	50-60	Anti-PD-1/PD-L1	P-0002917-T01-IM3	Non-Small Cell Lung Cancer	Primary	51	6.65493	30	0	NA	1	PD
P-0009764	Wild	Female	16	0:LIVING	31-50	Anti-PD-1/PD-L1	P-0009764-T01-IM5	Non-Small Cell Lung Cancer	Primary	51	22.5106	16	0	NA	0	SD
P-0010213	Wild	Female	25	0:LIVING	31-50	Anti-PD-1/PD-L1	P-0010213-T01-IM5	Non-Small Cell Lung Cancer	Metastasis	51	15.6595	25	0	NA	0	PR
P-0010760	Wild	Male	22	0:LIVING	50-60	Anti-PD-1/PD-L1	P-0010760-T01-IM5	Non-Small Cell Lung Cancer	Primary	51	4.8936	22	0	NA	1	PD
P-0012866	Wild	Female	19	1:DECEASED	31-50	Anti-PD-1/PD-L1	P-0012866-T01-IM5	Non-Small Cell Lung Cancer	Metastasis	51	5.87232	19	1	NA	1	PD
P-0006713	XMut	Female	23	0:LIVING	50-60	Anti-PD-1/PD-L1	P-0006713-T01-IM5	Non-Small Cell Lung Cancer	Metastasis	52	45.0211	23	0	NA	NA	NA
P-0001171	XMut	Male	29	0:LIVING	50-60	Anti-PD-1/PD-L1	P-0001171-T01-IM3	Non-Small Cell Lung Cancer	Metastasis	52	96.4965	29	0	NA	1	PR
P-0006071	XMut	Female	19	0:LIVING	50-60	Anti-PD-1/PD-L1	P-0006071-T01-IM5	Non-Small Cell Lung Cancer	Primary	52	19.5744	19	0	NA	1	SD
P-0000628	Wild	Male	2	1:DECEASED	50-60	Anti-PD-1/PD-L1	P-0000628-T01-IM3	Non-Small Cell Lung Cancer	Metastasis	52	4.43662	2	1	NA	NA	NA
P-0010945	Wild	Male	1	1:DECEASED	50-60	Anti-PD-1/PD-L1	P-0010945-T01-IM5	Non-Small Cell Lung Cancer	Metastasis	52	0	1	1	NA	NA	NA
P-0003119	Wild	Male	28	0:LIVING	50-60	Anti-PD-1/PD-L1	P-0003119-T01-IM5	Non-Small Cell Lung Cancer	Primary	53	12.7234	28	0	NA	1	SD
P-0004701	Wild	Female	30	0:LIVING	50-60	Anti-PD-1/PD-L1	P-0004701-T01-IM5	Non-Small Cell Lung Cancer	Primary	53	19.5744	30	0	NA	0	PR
P-0010645	Wild	Male	3	1:DECEASED	50-60	Anti-PD-1/PD-L1	P-0010645-T01-IM5	Non-Small Cell Lung Cancer	Primary	53	3.91488	3	1	NA	NA	NA
P-0015780	Wild	Male	18	0:LIVING	50-60	Anti-PD-1/PD-L1	P-0015780-T01-IM6	Non-Small Cell Lung Cancer	Primary	53	6.05289	18	0	NA	1	PD
P-0002637	Wild	Male	37	0:LIVING	50-60	Anti-PD-1/PD-L1+CTLA-4	P-0002637-T01-IM3	Non-Small Cell Lung Cancer	Metastasis	54	18.8556	37	0	NA	0	CR
P-0005115	Wild	Male	15	0:LIVING	50-60	Anti-PD-1/PD-L1	P-0005115-T01-IM5	Non-Small Cell Lung Cancer	Metastasis	54	1.95744	15	0	NA	1	PD
P-0006114	Wild	Female	7	1:DECEASED	50-60	Anti-PD-1/PD-L1	P-0006114-T01-IM5	Non-Small Cell Lung Cancer	Metastasis	54	2.93616	7	1	NA	1	PD
P-0009833	Wild	Female	20	0:LIVING	50-60	Anti-PD-1/PD-L1	P-0009833-T01-IM5	Non-Small Cell Lung Cancer	Primary	54	32.2978	20	0	NA	1	SD
P-0015531	Wild	Female	9	1:DECEASED	50-60	Anti-PD-1/PD-L1	P-0015531-T01-IM6	Non-Small Cell Lung Cancer	Metastasis	54	4.32349	9	1	NA	0	PR
P-0002874	XMut	Female	3	1:DECEASED	50-60	Anti-PD-1/PD-L1	P-0002874-T01-IM3	Non-Small Cell Lung Cancer	Metastasis	55	14.419	3	1	NA	1	PD
P-0012817	XMut	Male	18	0:LIVING	50-60	Anti-PD-1/PD-L1	P-0012817-T01-IM5	Non-Small Cell Lung Cancer	Metastasis	55	33.2765	18	0	NA	0	PR
P-0001633	Wild	Female	1	1:DECEASED	50-60	Anti-PD-1/PD-L1	P-0001633-T01-IM3	Non-Small Cell Lung Cancer	Primary	55	4.43662	1	1	NA	1	PD
P-0003278	Wild	Female	0	1:DECEASED	50-60	Anti-PD-1/PD-L1	P-0003278-T01-IM5	Non-Small Cell Lung Cancer	Metastasis	55	14.6808	0	1	NA	NA	NA
P-0010257	Wild	Female	0	1:DECEASED	50-60	Anti-PD-1/PD-L1	P-0010257-T01-IM5	Non-Small Cell Lung Cancer	Metastasis	55	9.7872	0	1	NA	NA	NA
P-0010840	Wild	Female	2	1:DECEASED	50-60	Anti-PD-1/PD-L1	P-0010840-T02-IM5	Non-Small Cell Lung Cancer	Metastasis	55	10.7659	2	1	NA	1	PD
P-0010986	Wild	Female	2	1:DECEASED	50-60	Anti-PD-1/PD-L1	P-0010986-T01-IM5	Non-Small Cell Lung Cancer	Primary	55	7.82976	2	1	NA	1	SD
P-0013656	Wild	Female	5	1:DECEASED	50-60	Anti-PD-1/PD-L1	P-0013656-T01-IM5	Non-Small Cell Lung Cancer	Metastasis	55	3.91488	5	1	NA	NA	NA
P-0000205	Wild	Female	2	1:DECEASED	50-60	Anti-PD-1/PD-L1+CTLA-4	P-0000205-T01-IM3	Non-Small Cell Lung Cancer	Metastasis	56	5.54578	2	1	NA	NA	NA
P-0002965	Wild	Male	11	1:DECEASED	50-60	Anti-PD-1/PD-L1	P-0002965-T01-IM3	Non-Small Cell Lung Cancer	Primary	56	7.76409	11	1	NA	1	PD
P-0002969	Wild	Male	2	1:DECEASED	50-60	Anti-PD-1/PD-L1	P-0002969-T01-IM3	Non-Small Cell Lung Cancer	Metastasis	56	22.1831	2	1	NA	1	PD
P-0005579	Wild	Female	1	1:DECEASED	50-60	Anti-PD-1/PD-L1	P-0005579-T01-IM5	Non-Small Cell Lung Cancer	Primary	56	1.95744	1	1	NA	NA	NA
P-0009586	Wild	Female	24	0:LIVING	50-60	Anti-PD-1/PD-L1	P-0009586-T01-IM5	Non-Small Cell Lung Cancer	Metastasis	56	11.7446	24	0	NA	1	SD
P-0011036	Wild	Male	4	1:DECEASED	50-60	Anti-PD-1/PD-L1	P-0011036-T01-IM5	Non-Small Cell Lung Cancer	Metastasis	56	11.7446	4	1	NA	1	PD
P-0002320	Wild	Male	8	1:DECEASED	50-60	Anti-PD-1/PD-L1	P-0002320-T01-IM3	Non-Small Cell Lung Cancer	Metastasis	57	6.65493	8	1	NA	1	SD
P-0003635	Wild	Female	2	1:DECEASED	50-60	Anti-PD-1/PD-L1+CTLA-4	P-0003635-T01-IM5	Non-Small Cell Lung Cancer	Metastasis	57	6.85104	2	1	NA	NA	NA
P-0003782	Wild	Male	8	1:DECEASED	50-60	Anti-PD-1/PD-L1	P-0003782-T01-IM5	Non-Small Cell Lung Cancer	Metastasis	57	2.93616	8	1	NA	1	SD
P-0004117	Wild	Male	2	1:DECEASED	50-60	Anti-PD-1/PD-L1	P-0004117-T01-IM5	Non-Small Cell Lung Cancer	Primary	57	3.91488	2	1	NA	NA	NA
P-0004996	Wild	Male	46	1:DECEASED	50-60	Anti-PD-1/PD-L1+CTLA-4	P-0004996-T02-IM5	Non-Small Cell Lung Cancer	Metastasis	57	2.93616	46	1	NA	1	PD
P-0007278	Wild	Female	8	1:DECEASED	50-60	Anti-PD-1/PD-L1	P-0007278-T01-IM5	Non-Small Cell Lung Cancer	Primary	57	7.82976	8	1	NA	1	PD
P-0007418	Wild	Female	22	0:LIVING	50-60	Anti-PD-1/PD-L1	P-0007418-T01-IM5	Non-Small Cell Lung Cancer	Metastasis	57	16.6382	22	0	NA	0	SD
P-0008332	Wild	Female	26	0:LIVING	50-60	Anti-PD-1/PD-L1	P-0008332-T01-IM5	Non-Small Cell Lung Cancer	Metastasis	57	3.91488	26	0	NA	NA	NA
P-0013063	Wild	Male	0	1:DECEASED	50-60	Anti-PD-1/PD-L1	P-0013063-T01-IM5	Non-Small Cell Lung Cancer	Metastasis	57	10.7659	0	1	NA	NA	NA
P-0015785	Wild	Female	9	1:DECEASED	50-60	Anti-PD-1/PD-L1	P-0015785-T01-IM6	Non-Small Cell Lung Cancer	Primary	57	22.4822	9	1	NA	1	SD
P-0000978	Wild	Female	7	1:DECEASED	50-60	Anti-PD-1/PD-L1	P-0000978-T01-IM3	Non-Small Cell Lung Cancer	Metastasis	58	1.10916	7	1	NA	1	PD
P-0003738	Wild	Female	27	0:LIVING	50-60	Anti-PD-1/PD-L1	P-0003738-T02-IM5	Non-Small Cell Lung Cancer	Metastasis	58	4.8936	27	0	NA	1	PR
P-0004020	Wild	Female	28	1:DECEASED	50-60	Anti-PD-1/PD-L1+CTLA-4	P-0004020-T01-IM5	Non-Small Cell Lung Cancer	Primary	58	4.8936	28	1	NA	1	SD
P-0004120	Wild	Female	12	0:LIVING	50-60	Anti-PD-1/PD-L1	P-0004120-T01-IM5	Non-Small Cell Lung Cancer	Primary	58	0.97872	12	0	NA	NA	NA
P-0008295	Wild	Male	14	0:LIVING	50-60	Anti-PD-1/PD-L1	P-0008295-T01-IM5	Non-Small Cell Lung Cancer	Metastasis	58	5.87232	14	0	NA	1	PD
P-0008874	Wild	Male	1	1:DECEASED	50-60	Anti-PD-1/PD-L1	P-0008874-T01-IM5	Non-Small Cell Lung Cancer	Primary	58	10.7659	1	1	NA	NA	NA
P-0009434	Wild	Male	0	0:LIVING	50-60	Anti-PD-1/PD-L1	P-0009434-T01-IM5	Non-Small Cell Lung Cancer	Primary	58	4.8936	0	0	NA	NA	NA
P-0009476	Wild	Female	5	1:DECEASED	50-60	Anti-PD-1/PD-L1	P-0009476-T01-IM5	Non-Small Cell Lung Cancer	Metastasis	58	7.82976	5	1	NA	NA	NA
P-0010025	Wild	Female	10	1:DECEASED	50-60	Anti-PD-1/PD-L1	P-0010025-T01-IM5	Non-Small Cell Lung Cancer	Primary	58	10.7659	10	1	NA	1	PD
P-0013189	Wild	Female	20	0:LIVING	50-60	Anti-PD-1/PD-L1	P-0013189-T01-IM5	Non-Small Cell Lung Cancer	Metastasis	58	1.95744	20	0	NA	NA	NA
P-0000604	Wild	Male	57	0:LIVING	50-60	Anti-PD-1/PD-L1+CTLA-4	P-0000604-T01-IM3	Non-Small Cell Lung Cancer	Primary	59	4.43662	57	0	NA	1	SD
P-0003347	Wild	Male	15	1:DECEASED	50-60	Anti-PD-1/PD-L1	P-0003347-T01-IM5	Non-Small Cell Lung Cancer	Metastasis	59	15.6595	15	1	NA	1	SD
P-0003368	Wild	Female	38	0:LIVING	50-60	Anti-PD-1/PD-L1+CTLA-4	P-0003368-T01-IM5	Non-Small Cell Lung Cancer	Primary	59	8.80848	38	0	NA	0	PR
P-0004279	Wild	Female	13	0:LIVING	50-60	Anti-PD-1/PD-L1	P-0004279-T01-IM5	Non-Small Cell Lung Cancer	Metastasis	59	2.93616	13	0	NA	1	PD
P-0004827	Wild	Male	19	1:DECEASED	50-60	Anti-PD-1/PD-L1	P-0004827-T01-IM5	Non-Small Cell Lung Cancer	Primary	59	8.80848	19	1	NA	1	SD
P-0005792	Wild	Male	10	1:DECEASED	50-60	Anti-PD-1/PD-L1	P-0005792-T01-IM5	Non-Small Cell Lung Cancer	Metastasis	59	10.7659	10	1	NA	1	PD
P-0006046	Wild	Male	14	0:LIVING	50-60	Anti-PD-1/PD-L1	P-0006046-T01-IM5	Non-Small Cell Lung Cancer	Primary	59	19.5744	14	0	NA	NA	NA
P-0007121	Wild	Female	17	0:LIVING	50-60	Anti-PD-1/PD-L1	P-0007121-T01-IM5	Non-Small Cell Lung Cancer	Primary	59	7.82976	17	0	NA	0	PR
P-0009532	Wild	Male	2	1:DECEASED	50-60	Anti-PD-1/PD-L1	P-0009532-T01-IM5	Non-Small Cell Lung Cancer	Metastasis	59	10.7659	2	1	NA	NA	NA
P-0009915	Wild	Male	7	1:DECEASED	50-60	Anti-PD-1/PD-L1	P-0009915-T01-IM5	Non-Small Cell Lung Cancer	Metastasis	59	7.82976	7	1	NA	NA	NA
P-0012846	Wild	Female	20	0:LIVING	50-60	Anti-PD-1/PD-L1	P-0012846-T01-IM5	Non-Small Cell Lung Cancer	Metastasis	59	7.82976	20	0	NA	0	PR
P-0009714	XMut	Male	5	1:DECEASED	50-60	Anti-PD-1/PD-L1	P-0009714-T01-IM5	Non-Small Cell Lung Cancer	Primary	60	19.5744	5	1	NA	NA	NA
P-0001836	Wild	Female	6	0:LIVING	50-60	Anti-PD-1/PD-L1	P-0001836-T01-IM3	Non-Small Cell Lung Cancer	Metastasis	60	25.5106	6	0	NA	1	PD
P-0008765	Wild	Male	3	0:LIVING	50-60	Anti-PD-1/PD-L1	P-0008765-T01-IM5	Non-Small Cell Lung Cancer	Metastasis	60	7.82976	3	0	NA	NA	NA
P-0010362	Wild	Female	3	1:DECEASED	50-60	Anti-PD-1/PD-L1	P-0010362-T01-IM5	Non-Small Cell Lung Cancer	Primary	60	2.93616	3	1	NA	NA	NA
P-0016614	Wild	Female	4	1:DECEASED	50-60	Anti-PD-1/PD-L1	P-0016614-T01-IM6	Non-Small Cell Lung Cancer	Metastasis	60	7.78228	4	1	NA	NA	NA
P-0009660	XMut	Male	20	0:LIVING	61-70	Anti-PD-1/PD-L1	P-0009660-T01-IM5	Non-Small Cell Lung Cancer	Metastasis	61	23.4893	20	0	NA	NA	NA
P-0014328	XMut	Female	1	1:DECEASED	61-70	Anti-PD-1/PD-L1+CTLA-4	P-0014328-T01-IM6	Non-Small Cell Lung Cancer	Metastasis	61	4.32349	1	1	NA	NA	NA
P-0000082	Wild	Male	57	0:LIVING	50-60	Anti-PD-1/PD-L1	P-0000082-T01-IM3	Non-Small Cell Lung Cancer	Primary	61	13.3099	57	0	NA	1	PR
P-0002794	Wild	Female	25	0:LIVING	61-70	Anti-PD-1/PD-L1	P-0002794-T01-IM3	Non-Small Cell Lung Cancer	Metastasis	61	0	25	0	NA	1	PR
P-0002826	Wild	Female	4	1:DECEASED	61-70	Anti-PD-1/PD-L1	P-0002826-T01-IM3	Non-Small Cell Lung Cancer	Metastasis	61	14.419	4	1	NA	1	PD
P-0003229	Wild	Male	21	1:DECEASED	50-60	Anti-PD-1/PD-L1	P-0003229-T01-IM5	Non-Small Cell Lung Cancer	Metastasis	61	49.9147	21	1	NA	0	PR
P-0003584	Wild	Female	36	1:DECEASED	50-60	Anti-PD-1/PD-L1	P-0003584-T01-IM5	Non-Small Cell Lung Cancer	Primary	61	10.7659	36	1	NA	1	SD
P-0004054	Wild	Male	4	1:DECEASED	61-70	Anti-PD-1/PD-L1	P-0004054-T01-IM5	Non-Small Cell Lung Cancer	Primary	61	13.7021	4	1	NA	1	SD
P-0004099	Wild	Male	3	1:DECEASED	61-70	Anti-PD-1/PD-L1	P-0004099-T01-IM5	Non-Small Cell Lung Cancer	Primary	61	12.7234	3	1	NA	NA	NA
P-0004613	Wild	Female	0	0:LIVING	61-70	Anti-PD-1/PD-L1	P-0004613-T01-IM5	Non-Small Cell Lung Cancer	Primary	61	3.91488	0	0	NA	NA	NA
P-0005981	Wild	Male	47	0:LIVING	50-60	Anti-PD-1/PD-L1	P-0005981-T01-IM5	Non-Small Cell Lung Cancer	Metastasis	61	9.7872	47	0	NA	1	SD
P-0006343	Wild	Female	28	0:LIVING	50-60	Anti-PD-1/PD-L1	P-0006343-T01-IM5	Non-Small Cell Lung Cancer	Primary	61	5.87232	28	0	NA	1	PD
P-0007119	Wild	Male	21	0:LIVING	61-70	Anti-PD-1/PD-L1	P-0007119-T01-IM5	Non-Small Cell Lung Cancer	Primary	61	22.5106	21	0	NA	NA	NA
P-0009419	Wild	Male	20	0:LIVING	50-60	Anti-PD-1/PD-L1	P-0009419-T01-IM5	Non-Small Cell Lung Cancer	Metastasis	61	12.7234	20	0	NA	1	PD
P-0011180	Wild	Female	7	0:LIVING	50-60	Anti-PD-1/PD-L1	P-0011180-T01-IM5	Non-Small Cell Lung Cancer	Primary	61	1.95744	7	0	NA	1	PD
P-0016782	Wild	Female	3	0:LIVING	50-60	Anti-PD-1/PD-L1	P-0016782-T01-IM6	Non-Small Cell Lung Cancer	Metastasis	61	21.6175	3	0	NA	NA	NA
P-0003562	Wild	Male	45	0:LIVING	50-60	Anti-PD-1/PD-L1	P-0003562-T01-IM5	Non-Small Cell Lung Cancer	Primary	62	36.2126	45	0	NA	1	SD
P-0004442	Wild	Male	26	0:LIVING	61-70	Anti-PD-1/PD-L1	P-0004442-T01-IM5	Non-Small Cell Lung Cancer	Primary	62	34.2552	26	0	NA	1	PD
P-0006084	Wild	Male	21	1:DECEASED	61-70	Anti-PD-1/PD-L1	P-0006084-T01-IM5	Non-Small Cell Lung Cancer	Primary	62	6.85104	21	1	NA	1	SD
P-0011033	Wild	Female	11	1:DECEASED	61-70	Anti-PD-1/PD-L1	P-0011033-T01-IM5	Non-Small Cell Lung Cancer	Metastasis	62	1.95744	11	1	NA	1	PD
P-0011508	Wild	Male	1	1:DECEASED	61-70	Anti-PD-1/PD-L1	P-0011508-T01-IM5	Non-Small Cell Lung Cancer	Metastasis	62	6.85104	1	1	NA	NA	NA
P-0011546	Wild	Female	3	0:LIVING	61-70	Anti-PD-1/PD-L1	P-0011546-T01-IM5	Non-Small Cell Lung Cancer	Metastasis	62	9.7872	3	0	NA	NA	NA
P-0015222	Wild	Male	0	1:DECEASED	61-70	Anti-PD-1/PD-L1	P-0015222-T01-IM6	Non-Small Cell Lung Cancer	Primary	62	7.78228	0	1	NA	NA	NA
P-0016481	Wild	Male	6	1:DECEASED	61-70	Anti-PD-1/PD-L1	P-0016481-T01-IM6	Non-Small Cell Lung Cancer	Primary	62	19.8881	6	1	NA	NA	NA
P-0002758	Wild	Male	2	1:DECEASED	61-70	Anti-PD-1/PD-L1	P-0002758-T01-IM3	Non-Small Cell Lung Cancer	Primary	63	35.493	2	1	NA	1	PD
P-0003157	Wild	Male	3	1:DECEASED	61-70	Anti-PD-1/PD-L1	P-0003157-T01-IM5	Non-Small Cell Lung Cancer	Primary	63	5.87232	3	1	NA	1	PD
P-0003628	Wild	Male	5	1:DECEASED	61-70	Anti-PD-1/PD-L1	P-0003628-T01-IM5	Non-Small Cell Lung Cancer	Primary	63	12.7234	5	1	NA	NA	NA
P-0004472	Wild	Female	10	1:DECEASED	61-70	Anti-PD-1/PD-L1	P-0004472-T01-IM5	Non-Small Cell Lung Cancer	Metastasis	63	13.7021	10	1	NA	1	SD
P-0004759	Wild	Female	2	1:DECEASED	61-70	Anti-PD-1/PD-L1	P-0004759-T01-IM5	Non-Small Cell Lung Cancer	Primary	63	1.95744	2	1	NA	1	PD
P-0006047	Wild	Female	24	0:LIVING	61-70	Anti-PD-1/PD-L1	P-0006047-T02-IM5	Non-Small Cell Lung Cancer	Metastasis	63	1.95744	24	0	NA	1	PR
P-0006294	Wild	Female	15	1:DECEASED	61-70	Anti-PD-1/PD-L1	P-0006294-T01-IM5	Non-Small Cell Lung Cancer	Primary	63	3.91488	15	1	NA	1	SD
P-0007580	Wild	Female	10	1:DECEASED	61-70	Anti-PD-1/PD-L1	P-0007580-T01-IM5	Non-Small Cell Lung Cancer	Primary	63	2.93616	10	1	NA	NA	NA
P-0008438	Wild	Male	0	0:LIVING	61-70	Anti-PD-1/PD-L1	P-0008438-T01-IM5	Non-Small Cell Lung Cancer	Primary	63	2.93616	0	0	NA	NA	NA
P-0008851	Wild	Male	3	1:DECEASED	61-70	Anti-PD-1/PD-L1	P-0008851-T01-IM5	Non-Small Cell Lung Cancer	Primary	63	7.82976	3	1	NA	1	PD
P-0009161	Wild	Female	13	0:LIVING	61-70	Anti-PD-1/PD-L1	P-0009161-T01-IM5	Non-Small Cell Lung Cancer	Metastasis	63	10.7659	13	0	NA	NA	NA
P-0009505	Wild	Female	3	1:DECEASED	61-70	Anti-PD-1/PD-L1	P-0009505-T01-IM5	Non-Small Cell Lung Cancer	Metastasis	63	2.93616	3	1	NA	1	PD
P-0014599	Wild	Male	17	0:LIVING	61-70	Anti-PD-1/PD-L1	P-0014599-T01-IM6	Non-Small Cell Lung Cancer	Primary	63	14.6999	17	0	NA	0	SD
P-0014736	Wild	Male	1	1:DECEASED	61-70	Anti-PD-1/PD-L1	P-0014736-T01-IM6	Non-Small Cell Lung Cancer	Metastasis	63	5.18819	1	1	NA	NA	NA
P-0015348	Wild	Male	15	0:LIVING	61-70	Anti-PD-1/PD-L1	P-0015348-T01-IM6	Non-Small Cell Lung Cancer	Metastasis	63	10.3764	15	0	NA	NA	NA
P-0001144	Wild	Male	2	1:DECEASED	61-70	Anti-PD-1/PD-L1	P-0001144-T01-IM3	Non-Small Cell Lung Cancer	Primary	64	7.76409	2	1	NA	NA	NA
P-0002731	Wild	Female	25	0:LIVING	61-70	Anti-PD-1/PD-L1	P-0002731-T02-IM5	Non-Small Cell Lung Cancer	Metastasis	64	9.7872	25	0	NA	0	PR
P-0006321	Wild	Male	0	1:DECEASED	61-70	Anti-PD-1/PD-L1	P-0006321-T01-IM5	Non-Small Cell Lung Cancer	Primary	64	2.93616	0	1	NA	NA	NA
P-0009319	Wild	Male	35	0:LIVING	61-70	Anti-PD-1/PD-L1+CTLA-4	P-0009319-T01-IM5	Non-Small Cell Lung Cancer	Metastasis	64	1.95744	35	0	NA	1	SD
P-0000302	Wild	Male	15	0:LIVING	61-70	Anti-PD-1/PD-L1	P-0000302-T01-IM3	Non-Small Cell Lung Cancer	Metastasis	65	1.10916	15	0	NA	0	PR
P-0001093	Wild	Male	42	0:LIVING	61-70	Anti-PD-1/PD-L1+CTLA-4	P-0001093-T01-IM3	Non-Small Cell Lung Cancer	Metastasis	65	12.2007	42	0	NA	1	SD
P-0001437	Wild	Female	4	1:DECEASED	61-70	Anti-PD-1/PD-L1	P-0001437-T01-IM3	Non-Small Cell Lung Cancer	Primary	65	1.10916	4	1	NA	NA	NA
P-0002028	Wild	Female	33	0:LIVING	61-70	Anti-PD-1/PD-L1	P-0002028-T01-IM3	Non-Small Cell Lung Cancer	Primary	65	6.65493	33	0	NA	0	PR
P-0003972	Wild	Male	0	1:DECEASED	61-70	Anti-PD-1/PD-L1	P-0003972-T01-IM5	Non-Small Cell Lung Cancer	Primary	65	5.87232	0	1	NA	NA	NA
P-0004395	Wild	Female	0	1:DECEASED	61-70	Anti-PD-1/PD-L1	P-0004395-T01-IM5	Non-Small Cell Lung Cancer	Metastasis	65	7.82976	0	1	NA	NA	NA
P-0006895	Wild	Male	19	0:LIVING	61-70	Anti-PD-1/PD-L1	P-0006895-T01-IM5	Non-Small Cell Lung Cancer	Metastasis	65	36.2126	19	0	NA	0	PR
P-0007068	Wild	Male	6	1:DECEASED	61-70	Anti-PD-1/PD-L1	P-0007068-T01-IM5	Non-Small Cell Lung Cancer	Metastasis	65	8.80848	6	1	NA	NA	NA
P-0007525	Wild	Female	2	1:DECEASED	61-70	Anti-PD-1/PD-L1	P-0007525-T01-IM5	Non-Small Cell Lung Cancer	Metastasis	65	4.8936	2	1	NA	NA	NA
P-0008442	Wild	Female	11	1:DECEASED	61-70	Anti-PD-1/PD-L1	P-0008442-T01-IM5	Non-Small Cell Lung Cancer	Metastasis	65	4.8936	11	1	NA	1	PD
P-0008786	Wild	Male	24	0:LIVING	61-70	Anti-PD-1/PD-L1	P-0008786-T01-IM5	Non-Small Cell Lung Cancer	Metastasis	65	4.8936	24	0	NA	0	SD
P-0009426	Wild	Female	11	1:DECEASED	61-70	Anti-PD-1/PD-L1	P-0009426-T01-IM5	Non-Small Cell Lung Cancer	Metastasis	65	9.7872	11	1	NA	1	SD
P-0014451	Wild	Female	8	1:DECEASED	61-70	Anti-PD-1/PD-L1	P-0014451-T01-IM6	Non-Small Cell Lung Cancer	Primary	65	9.51168	8	1	NA	1	PD
P-0014529	Wild	Female	16	0:LIVING	61-70	Anti-PD-1/PD-L1	P-0014529-T01-IM6	Non-Small Cell Lung Cancer	Primary	65	21.6175	16	0	NA	0	PR
P-0014786	Wild	Female	6	1:DECEASED	61-70	Anti-PD-1/PD-L1	P-0014786-T01-IM6	Non-Small Cell Lung Cancer	Primary	65	11.2411	6	1	NA	1	PD
P-0006768	XMut	Male	16	0:LIVING	61-70	Anti-PD-1/PD-L1	P-0006768-T01-IM5	Non-Small Cell Lung Cancer	Primary	66	7.82976	16	0	NA	1	SD
P-0000458	Wild	Male	5	1:DECEASED	61-70	Anti-PD-1/PD-L1	P-0000458-T01-IM3	Non-Small Cell Lung Cancer	Primary	66	1.10916	5	1	NA	1	PD
P-0000867	Wild	Male	0	1:DECEASED	61-70	Anti-PD-1/PD-L1	P-0000867-T01-IM3	Non-Small Cell Lung Cancer	Primary	66	6.65493	0	1	NA	NA	NA
P-0002766	Wild	Female	6	1:DECEASED	61-70	Anti-PD-1/PD-L1	P-0002766-T01-IM3	Non-Small Cell Lung Cancer	Primary	66	6.65493	6	1	NA	1	PD
P-0005752	Wild	Male	14	1:DECEASED	61-70	Anti-PD-1/PD-L1	P-0005752-T01-IM5	Non-Small Cell Lung Cancer	Metastasis	66	3.91488	14	1	NA	1	PD
P-0006674	Wild	Female	7	1:DECEASED	61-70	Anti-PD-1/PD-L1	P-0006674-T01-IM5	Non-Small Cell Lung Cancer	Metastasis	66	16.6382	7	1	NA	NA	NA
P-0009959	Wild	Male	13	1:DECEASED	61-70	Anti-PD-1/PD-L1	P-0009959-T01-IM5	Non-Small Cell Lung Cancer	Primary	66	2.93616	13	1	NA	1	SD
P-0011453	Wild	Male	1	1:DECEASED	61-70	Anti-PD-1/PD-L1	P-0011453-T01-IM5	Non-Small Cell Lung Cancer	Primary	66	5.87232	1	1	NA	NA	NA
P-0003869	XMut	Female	40	0:LIVING	61-70	Anti-PD-1/PD-L1	P-0003869-T01-IM5	Non-Small Cell Lung Cancer	Primary	67	54.8083	40	0	NA	1	SD
P-0000165	Wild	Female	1	1:DECEASED	61-70	Anti-PD-1/PD-L1	P-0000165-T01-IM3	Non-Small Cell Lung Cancer	Primary	67	5.54578	1	1	NA	NA	NA
P-0000681	Wild	Female	28	0:LIVING	61-70	Anti-PD-1/PD-L1	P-0000681-T01-IM3	Non-Small Cell Lung Cancer	Metastasis	67	18.8556	28	0	NA	1	SD
P-0002160	Wild	Male	6	1:DECEASED	61-70	Anti-PD-1/PD-L1	P-0002160-T01-IM3	Non-Small Cell Lung Cancer	Metastasis	67	13.3099	6	1	NA	1	PD
P-0002444	Wild	Male	13	1:DECEASED	61-70	Anti-PD-1/PD-L1	P-0002444-T01-IM3	Non-Small Cell Lung Cancer	Metastasis	67	17.7465	13	1	NA	1	PD
P-0002551	Wild	Female	6	0:LIVING	61-70	Anti-PD-1/PD-L1	P-0002551-T01-IM3	Non-Small Cell Lung Cancer	Primary	67	17.7465	6	0	NA	NA	NA
P-0002639	Wild	Female	11	0:LIVING	61-70	Anti-PD-1/PD-L1	P-0002639-T01-IM3	Non-Small Cell Lung Cancer	Primary	67	12.2007	11	0	NA	0	PR
P-0003132	Wild	Female	7	1:DECEASED	61-70	Anti-PD-1/PD-L1	P-0003132-T01-IM5	Non-Small Cell Lung Cancer	Metastasis	67	33.2765	7	1	NA	1	SD
P-0005464	Wild	Female	11	1:DECEASED	61-70	Anti-PD-1/PD-L1	P-0005464-T01-IM5	Non-Small Cell Lung Cancer	Primary	67	6.85104	11	1	NA	NA	NA
P-0006642	Wild	Female	14	1:DECEASED	61-70	Anti-PD-1/PD-L1	P-0006642-T01-IM5	Non-Small Cell Lung Cancer	Metastasis	67	20.5531	14	1	NA	1	PD
P-0006954	Wild	Female	3	1:DECEASED	61-70	Anti-PD-1/PD-L1	P-0006954-T01-IM5	Non-Small Cell Lung Cancer	Primary	67	7.82976	3	1	NA	1	PD
P-0007123	Wild	Female	24	0:LIVING	61-70	Anti-PD-1/PD-L1	P-0007123-T01-IM5	Non-Small Cell Lung Cancer	Metastasis	67	8.80848	24	0	NA	0	PR
P-0008322	Wild	Male	29	0:LIVING	61-70	Anti-PD-1/PD-L1	P-0008322-T01-IM5	Non-Small Cell Lung Cancer	Primary	67	2.93616	29	0	NA	0	SD
P-0008922	Wild	Male	1	1:DECEASED	61-70	Anti-PD-1/PD-L1	P-0008922-T01-IM5	Non-Small Cell Lung Cancer	Metastasis	67	2.93616	1	1	NA	NA	NA
P-0009370	Wild	Female	1	0:LIVING	61-70	Anti-PD-1/PD-L1	P-0009370-T01-IM5	Non-Small Cell Lung Cancer	Primary	67	8.80848	1	0	NA	NA	NA
P-0010715	Wild	Male	15	0:LIVING	61-70	Anti-PD-1/PD-L1+CTLA-4	P-0010715-T01-IM5	Non-Small Cell Lung Cancer	Primary	67	49.9147	15	0	NA	0	PR
P-0012427	Wild	Male	7	1:DECEASED	61-70	Anti-PD-1/PD-L1	P-0012427-T01-IM5	Non-Small Cell Lung Cancer	Primary	67	5.87232	7	1	NA	1	PD
P-0012849	Wild	Male	2	1:DECEASED	61-70	Anti-PD-1/PD-L1	P-0012849-T01-IM5	Non-Small Cell Lung Cancer	Metastasis	67	9.7872	2	1	NA	1	PD
P-0015556	Wild	Male	30	0:LIVING	61-70	Anti-PD-1/PD-L1	P-0015556-T01-IM6	Non-Small Cell Lung Cancer	Metastasis	67	4.32349	30	0	NA	1	PR
P-0015648	Wild	Male	20	0:LIVING	61-70	Anti-PD-1/PD-L1	P-0015648-T01-IM6	Non-Small Cell Lung Cancer	Primary	67	4.32349	20	0	NA	NA	NA
P-0015984	Wild	Female	6	1:DECEASED	61-70	Anti-PD-1/PD-L1	P-0015984-T01-IM6	Non-Small Cell Lung Cancer	Metastasis	67	24.2115	6	1	NA	1	PD
P-0001832	Wild	Female	3	1:DECEASED	61-70	Anti-PD-1/PD-L1	P-0001832-T01-IM3	Non-Small Cell Lung Cancer	Metastasis	68	4.43662	3	1	NA	NA	NA
P-0002546	Wild	Male	25	1:DECEASED	61-70	Anti-PD-1/PD-L1+CTLA-4	P-0002546-T01-IM3	Non-Small Cell Lung Cancer	Primary	68	3.32747	25	1	NA	1	PR
P-0003811	Wild	Female	0	1:DECEASED	61-70	Anti-PD-1/PD-L1	P-0003811-T01-IM5	Non-Small Cell Lung Cancer	Primary	68	16.6382	0	1	NA	NA	NA
P-0004517	Wild	Male	22	1:DECEASED	61-70	Anti-PD-1/PD-L1	P-0004517-T01-IM5	Non-Small Cell Lung Cancer	Metastasis	68	14.6808	22	1	NA	1	PD
P-0004961	Wild	Female	9	1:DECEASED	61-70	Anti-PD-1/PD-L1	P-0004961-T01-IM5	Non-Small Cell Lung Cancer	Metastasis	68	0.97872	9	1	NA	1	SD
P-0005289	Wild	Male	5	1:DECEASED	61-70	Anti-PD-1/PD-L1	P-0005289-T01-IM5	Non-Small Cell Lung Cancer	Metastasis	68	9.7872	5	1	NA	1	PD
P-0006993	Wild	Male	3	1:DECEASED	61-70	Anti-PD-1/PD-L1	P-0006993-T01-IM5	Non-Small Cell Lung Cancer	Primary	68	7.82976	3	1	NA	1	PD
P-0010636	Wild	Male	16	1:DECEASED	61-70	Anti-PD-1/PD-L1	P-0010636-T01-IM5	Non-Small Cell Lung Cancer	Metastasis	68	6.85104	16	1	NA	1	SD
P-0011378	Wild	Male	2	1:DECEASED	61-70	Anti-PD-1/PD-L1	P-0011378-T01-IM5	Non-Small Cell Lung Cancer	Metastasis	68	8.80848	2	1	NA	NA	NA
P-0012049	Wild	Female	11	0:LIVING	61-70	Anti-PD-1/PD-L1	P-0012049-T01-IM5	Non-Small Cell Lung Cancer	Primary	68	10.7659	11	0	NA	NA	NA
P-0000208	Wild	Female	13	1:DECEASED	61-70	Anti-PD-1/PD-L1	P-0000208-T01-IM3	Non-Small Cell Lung Cancer	Primary	69	2.21831	13	1	NA	1	SD
P-0002247	Wild	Female	19	1:DECEASED	61-70	Anti-PD-1/PD-L1	P-0002247-T01-IM3	Non-Small Cell Lung Cancer	Primary	69	21.074	19	1	NA	1	PD
P-0002751	Wild	Female	11	1:DECEASED	61-70	Anti-PD-1/PD-L1	P-0002751-T01-IM3	Non-Small Cell Lung Cancer	Primary	69	2.21831	11	1	NA	1	SD
P-0003275	Wild	Male	17	1:DECEASED	61-70	Anti-PD-1/PD-L1	P-0003275-T01-IM5	Non-Small Cell Lung Cancer	Primary	69	2.93616	17	1	NA	1	SD
P-0004742	Wild	Male	18	0:LIVING	61-70	Anti-PD-1/PD-L1	P-0004742-T01-IM5	Non-Small Cell Lung Cancer	Metastasis	69	8.80848	18	0	NA	NA	NA
P-0004890	Wild	Female	18	0:LIVING	61-70	Anti-PD-1/PD-L1	P-0004890-T01-IM5	Non-Small Cell Lung Cancer	Primary	69	10.7659	18	0	NA	1	PD
P-0005510	Wild	Female	55	0:LIVING	61-70	Anti-PD-1/PD-L1	P-0005510-T01-IM5	Non-Small Cell Lung Cancer	Primary	69	5.87232	55	0	NA	1	PR
P-0007916	Wild	Male	22	0:LIVING	61-70	Anti-PD-1/PD-L1	P-0007916-T01-IM5	Non-Small Cell Lung Cancer	Primary	69	14.6808	22	0	NA	NA	NA
P-0009379	Wild	Male	1	1:DECEASED	61-70	Anti-PD-1/PD-L1	P-0009379-T01-IM5	Non-Small Cell Lung Cancer	Primary	69	9.7872	1	1	NA	1	SD
P-0009526	Wild	Male	5	1:DECEASED	61-70	Anti-PD-1/PD-L1	P-0009526-T01-IM5	Non-Small Cell Lung Cancer	Primary	69	11.7446	5	1	NA	NA	NA
P-0010355	Wild	Female	1	1:DECEASED	61-70	Anti-PD-1/PD-L1	P-0010355-T01-IM5	Non-Small Cell Lung Cancer	Primary	69	6.85104	1	1	NA	NA	NA
P-0010389	Wild	Male	9	1:DECEASED	61-70	Anti-PD-1/PD-L1	P-0010389-T01-IM5	Non-Small Cell Lung Cancer	Primary	69	0	9	1	NA	NA	NA
P-0012729	Wild	Male	9	1:DECEASED	61-70	Anti-PD-1/PD-L1	P-0012729-T01-IM5	Non-Small Cell Lung Cancer	Metastasis	69	6.85104	9	1	NA	1	SD
P-0014513	Wild	Female	3	0:LIVING	61-70	Anti-PD-1/PD-L1	P-0014513-T01-IM6	Non-Small Cell Lung Cancer	Primary	69	2.59409	3	0	NA	NA	NA
P-0015296	Wild	Male	15	0:LIVING	61-70	Anti-PD-1/PD-L1	P-0015296-T01-IM6	Non-Small Cell Lung Cancer	Metastasis	69	19.8881	15	0	NA	0	PR
P-0015593	Wild	Female	14	0:LIVING	61-70	Anti-PD-1/PD-L1	P-0015593-T01-IM6	Non-Small Cell Lung Cancer	Primary	69	4.32349	14	0	NA	NA	NA
P-0016046	Wild	Female	16	0:LIVING	61-70	Anti-PD-1/PD-L1	P-0016046-T01-IM6	Non-Small Cell Lung Cancer	Metastasis	69	5.18819	16	0	NA	1	PD
P-0001296	Wild	Female	2	1:DECEASED	>71	Anti-PD-1/PD-L1	P-0001296-T01-IM3	Non-Small Cell Lung Cancer	Metastasis	70	3.32747	2	1	NA	NA	NA
P-0001365	Wild	Male	2	1:DECEASED	>71	Anti-PD-1/PD-L1	P-0001365-T01-IM3	Non-Small Cell Lung Cancer	Primary	70	5.54578	2	1	NA	1	PD
P-0002279	Wild	Female	3	1:DECEASED	61-70	Anti-PD-1/PD-L1	P-0002279-T01-IM3	Non-Small Cell Lung Cancer	Primary	70	7.76409	3	1	NA	NA	NA
P-0003553	Wild	Female	21	0:LIVING	>71	Anti-PD-1/PD-L1	P-0003553-T01-IM5	Non-Small Cell Lung Cancer	Metastasis	70	29.3616	21	0	NA	NA	NA
P-0005048	Wild	Female	51	0:LIVING	61-70	Anti-PD-1/PD-L1+CTLA-4	P-0005048-T01-IM5	Non-Small Cell Lung Cancer	Primary	70	3.91488	51	0	NA	1	SD
P-0007583	Wild	Female	7	1:DECEASED	61-70	Anti-PD-1/PD-L1	P-0007583-T01-IM5	Non-Small Cell Lung Cancer	Metastasis	70	13.7021	7	1	NA	1	PD
P-0007879	Wild	Female	31	0:LIVING	61-70	Anti-PD-1/PD-L1	P-0007879-T01-IM5	Non-Small Cell Lung Cancer	Primary	70	9.7872	31	0	NA	1	PR
P-0007977	Wild	Female	3	1:DECEASED	61-70	Anti-PD-1/PD-L1	P-0007977-T01-IM5	Non-Small Cell Lung Cancer	Metastasis	70	5.87232	3	1	NA	1	PD
P-0011030	Wild	Male	1	1:DECEASED	61-70	Anti-PD-1/PD-L1	P-0011030-T01-IM5	Non-Small Cell Lung Cancer	Metastasis	70	0.97872	1	1	NA	NA	NA
P-0013233	Wild	Female	13	0:LIVING	61-70	Anti-PD-1/PD-L1	P-0013233-T01-IM5	Non-Small Cell Lung Cancer	Metastasis	70	7.82976	13	0	NA	NA	NA
P-0016910	Wild	Female	13	0:LIVING	61-70	Anti-PD-1/PD-L1	P-0016910-T01-IM6	Non-Small Cell Lung Cancer	Primary	70	2.59409	13	0	NA	NA	NA
P-0000363	Wild	Male	2	1:DECEASED	>71	Anti-PD-1/PD-L1	P-0000363-T01-IM3	Non-Small Cell Lung Cancer	Primary	71	12.2007	2	1	NA	1	PD
P-0002151	Wild	Female	25	0:LIVING	>71	Anti-PD-1/PD-L1	P-0002151-T01-IM3	Non-Small Cell Lung Cancer	Metastasis	71	9.9824	25	0	NA	1	PR
P-0004189	Wild	Male	16	0:LIVING	>71	Anti-PD-1/PD-L1	P-0004189-T01-IM5	Non-Small Cell Lung Cancer	Metastasis	71	58.7232	16	0	NA	NA	NA
P-0005898	Wild	Female	21	0:LIVING	>71	Anti-PD-1/PD-L1	P-0005898-T01-IM5	Non-Small Cell Lung Cancer	Primary	71	3.91488	21	0	NA	1	SD
P-0006268	Wild	Male	12	1:DECEASED	>71	Anti-PD-1/PD-L1	P-0006268-T01-IM5	Non-Small Cell Lung Cancer	Metastasis	71	1.95744	12	1	NA	NA	NA
P-0007051	Wild	Male	2	1:DECEASED	>71	Anti-PD-1/PD-L1	P-0007051-T01-IM5	Non-Small Cell Lung Cancer	Metastasis	71	13.7021	2	1	NA	NA	NA
P-0009655	Wild	Female	56	0:LIVING	61-70	Anti-PD-1/PD-L1+CTLA-4	P-0009655-T01-IM5	Non-Small Cell Lung Cancer	Primary	71	2.93616	56	0	NA	1	SD
P-0009762	Wild	Male	16	1:DECEASED	>71	Anti-PD-1/PD-L1	P-0009762-T01-IM5	Non-Small Cell Lung Cancer	Primary	71	7.82976	16	1	NA	NA	NA
P-0011499	Wild	Female	6	1:DECEASED	61-70	Anti-PD-1/PD-L1	P-0011499-T01-IM5	Non-Small Cell Lung Cancer	Metastasis	71	7.82976	6	1	NA	1	PD
P-0014562	Wild	Male	6	0:LIVING	61-70	Anti-PD-1/PD-L1	P-0014562-T01-IM6	Non-Small Cell Lung Cancer	Metastasis	71	12.1058	6	0	NA	NA	NA
P-0015078	Wild	Female	25	0:LIVING	61-70	Anti-PD-1/PD-L1	P-0015078-T01-IM6	Non-Small Cell Lung Cancer	Metastasis	71	7.78228	25	0	NA	1	PD
P-0015987	Wild	Female	10	1:DECEASED	61-70	Anti-PD-1/PD-L1	P-0015987-T01-IM6	Non-Small Cell Lung Cancer	Metastasis	71	7.78228	10	1	NA	NA	NA
P-0016308	Wild	Female	14	1:DECEASED	61-70	Anti-PD-1/PD-L1	P-0016308-T01-IM6	Non-Small Cell Lung Cancer	Metastasis	71	14.6999	14	1	NA	NA	NA
P-0002225	Wild	Male	17	1:DECEASED	>71	Anti-PD-1/PD-L1	P-0002225-T01-IM3	Non-Small Cell Lung Cancer	Metastasis	72	1.10916	17	1	NA	1	SD
P-0003322	Wild	Female	13	0:LIVING	>71	Anti-PD-1/PD-L1+CTLA-4	P-0003322-T01-IM5	Non-Small Cell Lung Cancer	Primary	72	2.93616	13	0	NA	0	SD
P-0003964	Wild	Male	4	1:DECEASED	>71	Anti-PD-1/PD-L1	P-0003964-T01-IM3	Non-Small Cell Lung Cancer	Metastasis	72	9.9824	4	1	NA	1	PD
P-0006582	Wild	Female	19	0:LIVING	>71	Anti-PD-1/PD-L1	P-0006582-T01-IM5	Non-Small Cell Lung Cancer	Metastasis	72	4.8936	19	0	NA	NA	NA
P-0008176	Wild	Female	23	0:LIVING	>71	Anti-PD-1/PD-L1	P-0008176-T01-IM5	Non-Small Cell Lung Cancer	Primary	72	3.91488	23	0	NA	1	PD
P-0010385	Wild	Male	0	1:DECEASED	>71	Anti-PD-1/PD-L1	P-0010385-T01-IM5	Non-Small Cell Lung Cancer	Primary	72	7.82976	0	1	NA	NA	NA
P-0012341	Wild	Female	3	1:DECEASED	>71	Anti-PD-1/PD-L1	P-0012341-T01-IM5	Non-Small Cell Lung Cancer	Metastasis	72	5.87232	3	1	NA	NA	NA
P-0012931	Wild	Male	2	0:LIVING	>71	Anti-PD-1/PD-L1	P-0012931-T01-IM5	Non-Small Cell Lung Cancer	Metastasis	72	9.7872	2	0	NA	1	SD
P-0016033	XMut	Male	15	0:LIVING	>71	Anti-PD-1/PD-L1	P-0016033-T01-IM6	Non-Small Cell Lung Cancer	Primary	73	28.535	15	0	NA	0	PR
P-0004588	XMut	Male	30	0:LIVING	>71	Anti-PD-1/PD-L1	P-0004588-T01-IM5	Non-Small Cell Lung Cancer	Primary	73	3.91488	30	0	NA	0	PR
P-0012678	XMut	Male	20	0:LIVING	>71	Anti-PD-1/PD-L1	P-0012678-T01-IM5	Non-Small Cell Lung Cancer	Metastasis	73	23.4893	20	0	NA	NA	NA
P-0010256	XMut	Female	21	1:DECEASED	>71	Anti-PD-1/PD-L1	P-0010256-T01-IM5	Non-Small Cell Lung Cancer	Primary	73	3.91488	21	1	NA	1	PD
P-0000731	Wild	Female	42	0:LIVING	>71	Anti-PD-1/PD-L1	P-0000731-T01-IM3	Non-Small Cell Lung Cancer	Metastasis	73	6.65493	42	0	NA	1	SD
P-0002351	Wild	Female	11	1:DECEASED	>71	Anti-PD-1/PD-L1	P-0002351-T01-IM3	Non-Small Cell Lung Cancer	Primary	73	7.76409	11	1	NA	1	SD
P-0002905	Wild	Male	6	1:DECEASED	>71	Anti-PD-1/PD-L1	P-0002905-T01-IM3	Non-Small Cell Lung Cancer	Primary	73	5.54578	6	1	NA	1	PD
P-0002921	Wild	Female	12	1:DECEASED	>71	Anti-PD-1/PD-L1	P-0002921-T01-IM3	Non-Small Cell Lung Cancer	Primary	73	14.419	12	1	NA	1	SD
P-0005295	Wild	Male	29	0:LIVING	>71	Anti-PD-1/PD-L1	P-0005295-T01-IM5	Non-Small Cell Lung Cancer	Metastasis	73	3.91488	29	0	NA	1	SD
P-0006516	Wild	Male	1	1:DECEASED	>71	Anti-PD-1/PD-L1	P-0006516-T01-IM5	Non-Small Cell Lung Cancer	Primary	73	1.95744	1	1	NA	NA	NA
P-0006572	Wild	Male	20	0:LIVING	>71	Anti-PD-1/PD-L1	P-0006572-T01-IM5	Non-Small Cell Lung Cancer	Metastasis	73	0	20	0	NA	NA	NA
P-0007514	Wild	Female	2	1:DECEASED	>71	Anti-PD-1/PD-L1	P-0007514-T01-IM5	Non-Small Cell Lung Cancer	Primary	73	3.91488	2	1	NA	NA	NA
P-0007597	Wild	Male	5	1:DECEASED	>71	Anti-PD-1/PD-L1	P-0007597-T01-IM5	Non-Small Cell Lung Cancer	Metastasis	73	15.6595	5	1	NA	1	PD
P-0008678	Wild	Female	25	0:LIVING	>71	Anti-PD-1/PD-L1	P-0008678-T01-IM5	Non-Small Cell Lung Cancer	Metastasis	73	7.82976	25	0	NA	NA	NA
P-0009501	Wild	Male	23	1:DECEASED	>71	Anti-PD-1/PD-L1	P-0009501-T01-IM5	Non-Small Cell Lung Cancer	Primary	73	5.87232	23	1	NA	1	PD
P-0009539	Wild	Female	1	1:DECEASED	>71	Anti-PD-1/PD-L1	P-0009539-T01-IM5	Non-Small Cell Lung Cancer	Metastasis	73	0	1	1	NA	NA	NA
P-0010648	Wild	Male	18	1:DECEASED	>71	Anti-PD-1/PD-L1	P-0010648-T01-IM5	Non-Small Cell Lung Cancer	Metastasis	73	1.95744	18	1	NA	1	PD
P-0011535	Wild	Female	8	1:DECEASED	>71	Anti-PD-1/PD-L1	P-0011535-T01-IM5	Non-Small Cell Lung Cancer	Primary	73	2.93616	8	1	NA	NA	NA
P-0011559	Wild	Male	7	1:DECEASED	>71	Anti-PD-1/PD-L1	P-0011559-T01-IM5	Non-Small Cell Lung Cancer	Metastasis	73	3.91488	7	1	NA	1	SD
P-0015177	Wild	Male	1	1:DECEASED	>71	Anti-PD-1/PD-L1	P-0015177-T01-IM6	Non-Small Cell Lung Cancer	Primary	73	7.78228	1	1	NA	NA	NA
P-0016174	Wild	Female	14	0:LIVING	>71	Anti-PD-1/PD-L1	P-0016174-T01-IM6	Non-Small Cell Lung Cancer	Primary	73	12.9705	14	0	NA	NA	NA
P-0016185	Wild	Male	9	1:DECEASED	>71	Anti-PD-1/PD-L1	P-0016185-T01-IM6	Non-Small Cell Lung Cancer	Primary	73	6.05289	9	1	NA	NA	NA
P-0012925	XMut	Male	10	1:DECEASED	>71	Anti-PD-1/PD-L1	P-0012925-T01-IM5	Non-Small Cell Lung Cancer	Primary	74	5.87232	10	1	NA	NA	NA
P-0004612	Wild	Male	4	1:DECEASED	>71	Anti-PD-1/PD-L1	P-0004612-T01-IM5	Non-Small Cell Lung Cancer	Primary	74	3.91488	4	1	NA	NA	NA
P-0004693	Wild	Female	2	1:DECEASED	>71	Anti-PD-1/PD-L1	P-0004693-T01-IM5	Non-Small Cell Lung Cancer	Primary	74	9.7872	2	1	NA	NA	NA
P-0008239	Wild	Female	15	1:DECEASED	>71	Anti-PD-1/PD-L1	P-0008239-T01-IM5	Non-Small Cell Lung Cancer	Metastasis	74	15.6595	15	1	NA	1	SD
P-0009020	Wild	Female	8	1:DECEASED	>71	Anti-PD-1/PD-L1	P-0009020-T01-IM5	Non-Small Cell Lung Cancer	Primary	74	12.7234	8	1	NA	NA	NA
P-0009068	Wild	Female	22	0:LIVING	>71	Anti-PD-1/PD-L1	P-0009068-T01-IM5	Non-Small Cell Lung Cancer	Metastasis	74	19.5744	22	0	NA	NA	NA
P-0009080	Wild	Male	7	1:DECEASED	>71	Anti-PD-1/PD-L1	P-0009080-T01-IM5	Non-Small Cell Lung Cancer	Metastasis	74	5.87232	7	1	NA	1	SD
P-0009431	Wild	Female	1	1:DECEASED	>71	Anti-PD-1/PD-L1	P-0009431-T01-IM5	Non-Small Cell Lung Cancer	Metastasis	74	8.80848	1	1	NA	NA	NA
P-0010215	Wild	Female	3	1:DECEASED	>71	Anti-PD-1/PD-L1	P-0010215-T01-IM5	Non-Small Cell Lung Cancer	Metastasis	74	6.85104	3	1	NA	NA	NA
P-0010855	Wild	Female	7	1:DECEASED	>71	Anti-PD-1/PD-L1	P-0010855-T01-IM5	Non-Small Cell Lung Cancer	Metastasis	74	6.85104	7	1	NA	NA	NA
P-0011012	Wild	Male	3	1:DECEASED	>71	Anti-PD-1/PD-L1	P-0011012-T01-IM5	Non-Small Cell Lung Cancer	Metastasis	74	3.91488	3	1	NA	NA	NA
P-0011192	Wild	Female	2	0:LIVING	>71	Anti-PD-1/PD-L1	P-0011192-T01-IM5	Non-Small Cell Lung Cancer	Metastasis	74	10.7659	2	0	NA	1	PD
P-0014772	Wild	Female	5	1:DECEASED	>71	Anti-PD-1/PD-L1	P-0014772-T01-IM6	Non-Small Cell Lung Cancer	Metastasis	74	8.64698	5	1	NA	NA	NA
P-0015214	Wild	Female	13	1:DECEASED	>71	Anti-PD-1/PD-L1	P-0015214-T01-IM6	Non-Small Cell Lung Cancer	Metastasis	74	24.2115	13	1	NA	NA	NA
P-0015937	Wild	Female	15	0:LIVING	>71	Anti-PD-1/PD-L1	P-0015937-T01-IM6	Non-Small Cell Lung Cancer	Metastasis	74	10.3764	15	0	NA	NA	NA
P-0007493	XMut	Male	13	0:LIVING	>71	Anti-PD-1/PD-L1	P-0007493-T02-IM5	Non-Small Cell Lung Cancer	Metastasis	75	18.5957	13	0	NA	0	PR
P-0003670	Wild	Female	20	0:LIVING	>71	Anti-PD-1/PD-L1	P-0003670-T01-IM5	Non-Small Cell Lung Cancer	Primary	75	0.97872	20	0	NA	NA	NA
P-0004232	Wild	Male	18	1:DECEASED	>71	Anti-PD-1/PD-L1	P-0004232-T01-IM5	Non-Small Cell Lung Cancer	Primary	75	6.85104	18	1	NA	1	PD
P-0004436	Wild	Male	24	1:DECEASED	>71	Anti-PD-1/PD-L1	P-0004436-T01-IM5	Non-Small Cell Lung Cancer	Primary	75	5.87232	24	1	NA	1	PD
P-0008935	Wild	Female	5	1:DECEASED	>71	Anti-PD-1/PD-L1	P-0008935-T01-IM5	Non-Small Cell Lung Cancer	Metastasis	75	10.7659	5	1	NA	1	PD
P-0014269	Wild	Male	9	1:DECEASED	>71	Anti-PD-1/PD-L1	P-0014269-T01-IM6	Non-Small Cell Lung Cancer	Metastasis	75	0.864698	9	1	NA	1	SD
P-0015955	Wild	Female	14	1:DECEASED	>71	Anti-PD-1/PD-L1	P-0015955-T01-IM6	Non-Small Cell Lung Cancer	Metastasis	75	6.91758	14	1	NA	NA	NA
P-0000235	Wild	Male	3	1:DECEASED	>71	Anti-PD-1/PD-L1	P-0000235-T01-IM3	Non-Small Cell Lung Cancer	Primary	76	8.87324	3	1	NA	1	PD
P-0001199	Wild	Female	2	1:DECEASED	>71	Anti-PD-1/PD-L1	P-0001199-T01-IM3	Non-Small Cell Lung Cancer	Primary	76	14.419	2	1	NA	NA	NA
P-0006728	Wild	Female	3	1:DECEASED	>71	Anti-PD-1/PD-L1	P-0006728-T01-IM5	Non-Small Cell Lung Cancer	Metastasis	76	13.7021	3	1	NA	NA	NA
P-0007083	Wild	Male	12	1:DECEASED	>71	Anti-PD-1/PD-L1	P-0007083-T02-IM6	Non-Small Cell Lung Cancer	Primary	76	12.9705	12	1	NA	NA	NA
P-0007101	Wild	Male	6	1:DECEASED	>71	Anti-PD-1/PD-L1	P-0007101-T02-IM5	Non-Small Cell Lung Cancer	Primary	76	11.7446	6	1	NA	1	PD
P-0008848	Wild	Male	5	1:DECEASED	>71	Anti-PD-1/PD-L1	P-0008848-T01-IM5	Non-Small Cell Lung Cancer	Metastasis	76	5.87232	5	1	NA	1	PD
P-0009256	Wild	Female	26	0:LIVING	>71	Anti-PD-1/PD-L1	P-0009256-T01-IM5	Non-Small Cell Lung Cancer	Metastasis	76	9.7872	26	0	NA	1	SD
P-0015047	Wild	Female	15	0:LIVING	>71	Anti-PD-1/PD-L1	P-0015047-T01-IM6	Non-Small Cell Lung Cancer	Metastasis	76	12.9705	15	0	NA	NA	NA
P-0016175	XMut	Female	1	1:DECEASED	>71	Anti-PD-1/PD-L1	P-0016175-T01-IM6	Non-Small Cell Lung Cancer	Metastasis	77	14.6999	1	1	NA	NA	NA
P-0009017	XMut	Male	10	0:LIVING	>71	Anti-PD-1/PD-L1	P-0009017-T01-IM5	Non-Small Cell Lung Cancer	Metastasis	77	33.2765	10	0	NA	NA	NA
P-0002295	Wild	Female	25	1:DECEASED	>71	Anti-PD-1/PD-L1	P-0002295-T01-IM3	Non-Small Cell Lung Cancer	Metastasis	77	4.43662	25	1	NA	1	PD
P-0005456	Wild	Male	2	1:DECEASED	>71	Anti-PD-1/PD-L1	P-0005456-T01-IM5	Non-Small Cell Lung Cancer	Primary	77	5.87232	2	1	NA	NA	NA
P-0007114	Wild	Male	1	1:DECEASED	>71	Anti-PD-1/PD-L1	P-0007114-T01-IM5	Non-Small Cell Lung Cancer	Metastasis	77	8.80848	1	1	NA	NA	NA
P-0007861	Wild	Female	12	1:DECEASED	>71	Anti-PD-1/PD-L1	P-0007861-T01-IM5	Non-Small Cell Lung Cancer	Metastasis	77	2.93616	12	1	NA	1	PD
P-0009274	Wild	Female	7	1:DECEASED	>71	Anti-PD-1/PD-L1+CTLA-4	P-0009274-T01-IM5	Non-Small Cell Lung Cancer	Metastasis	77	3.91488	7	1	NA	1	PD
P-0010013	Wild	Male	3	1:DECEASED	>71	Anti-PD-1/PD-L1	P-0010013-T01-IM5	Non-Small Cell Lung Cancer	Primary	77	1.95744	3	1	NA	NA	NA
P-0011244	Wild	Male	3	1:DECEASED	>71	Anti-PD-1/PD-L1	P-0011244-T01-IM5	Non-Small Cell Lung Cancer	Metastasis	77	2.93616	3	1	NA	1	PD
P-0011541	Wild	Female	13	0:LIVING	>71	Anti-PD-1/PD-L1	P-0011541-T01-IM5	Non-Small Cell Lung Cancer	Metastasis	77	3.91488	13	0	NA	0	PR
P-0016646	Wild	Male	4	1:DECEASED	>71	Anti-PD-1/PD-L1	P-0016646-T01-IM6	Non-Small Cell Lung Cancer	Primary	77	9.51168	4	1	NA	1	SD
P-0007099	Wild	Female	1	1:DECEASED	>71	Anti-PD-1/PD-L1	P-0007099-T01-IM5	Non-Small Cell Lung Cancer	Metastasis	78	10.7659	1	1	NA	NA	NA
P-0007619	Wild	Male	1	1:DECEASED	>71	Anti-PD-1/PD-L1	P-0007619-T01-IM5	Non-Small Cell Lung Cancer	Primary	78	9.7872	1	1	NA	1	PD
P-0009924	XMut	Male	13	0:LIVING	>71	Anti-PD-1/PD-L1	P-0009924-T01-IM5	Non-Small Cell Lung Cancer	Metastasis	79	17.617	13	0	NA	NA	NA
P-0005252	Wild	Female	2	1:DECEASED	>71	Anti-PD-1/PD-L1	P-0005252-T01-IM5	Non-Small Cell Lung Cancer	Primary	79	12.7234	2	1	NA	NA	NA
P-0005721	Wild	Male	14	1:DECEASED	>71	Anti-PD-1/PD-L1	P-0005721-T01-IM5	Non-Small Cell Lung Cancer	Primary	79	6.85104	14	1	NA	1	SD
P-0007633	Wild	Male	48	0:LIVING	>71	Anti-PD-1/PD-L1+CTLA-4	P-0007633-T01-IM5	Non-Small Cell Lung Cancer	Primary	79	2.93616	48	0	NA	1	SD
P-0014207	Wild	Male	4	1:DECEASED	>71	Anti-PD-1/PD-L1	P-0014207-T01-IM6	Non-Small Cell Lung Cancer	Metastasis	79	6.91758	4	1	NA	NA	NA
P-0000894	Wild	Male	57	0:LIVING	>71	Anti-PD-1/PD-L1	P-0000894-T01-IM3	Non-Small Cell Lung Cancer	Metastasis	80	5.54578	57	0	NA	1	SD
P-0001977	Wild	Male	4	1:DECEASED	>71	Anti-PD-1/PD-L1	P-0001977-T01-IM3	Non-Small Cell Lung Cancer	Metastasis	80	9.9824	4	1	NA	1	PD
P-0003034	Wild	Male	5	1:DECEASED	>71	Anti-PD-1/PD-L1	P-0003034-T01-IM5	Non-Small Cell Lung Cancer	Primary	80	13.7021	5	1	NA	1	SD
P-0005848	Wild	Female	14	0:LIVING	>71	Anti-PD-1/PD-L1	P-0005848-T01-IM5	Non-Small Cell Lung Cancer	Metastasis	80	16.6382	14	0	NA	0	SD
P-0005851	Wild	Male	18	0:LIVING	>71	Anti-PD-1/PD-L1	P-0005851-T01-IM5	Non-Small Cell Lung Cancer	Primary	80	20.5531	18	0	NA	NA	NA
P-0009473	Wild	Male	23	0:LIVING	>71	Anti-PD-1/PD-L1	P-0009473-T01-IM5	Non-Small Cell Lung Cancer	Primary	80	8.80848	23	0	NA	0	PR
P-0010736	Wild	Male	18	1:DECEASED	>71	Anti-PD-1/PD-L1	P-0010736-T01-IM5	Non-Small Cell Lung Cancer	Primary	80	25.4467	18	1	NA	1	SD
P-0012908	Wild	Male	13	1:DECEASED	>71	Anti-PD-1/PD-L1	P-0012908-T01-IM5	Non-Small Cell Lung Cancer	Metastasis	80	6.85104	13	1	NA	1	SD
P-0016284	Wild	Male	20	0:LIVING	>71	Anti-PD-1/PD-L1	P-0016284-T01-IM6	Non-Small Cell Lung Cancer	Primary	80	0.864698	20	0	NA	NA	NA
P-0016542	Wild	Male	1	1:DECEASED	>71	Anti-PD-1/PD-L1	P-0016542-T01-IM6	Non-Small Cell Lung Cancer	Primary	80	19.0234	1	1	NA	NA	NA
P-0005629	Wild	Female	5	1:DECEASED	>71	Anti-PD-1/PD-L1	P-0005629-T02-IM5	Non-Small Cell Lung Cancer	Primary	81	5.87232	5	1	NA	1	PD
P-0009293	Wild	Female	25	0:LIVING	>71	Anti-PD-1/PD-L1	P-0009293-T01-IM5	Non-Small Cell Lung Cancer	Metastasis	81	21.5318	25	0	NA	0	PR
P-0010024	Wild	Male	27	0:LIVING	>71	Anti-PD-1/PD-L1	P-0010024-T01-IM5	Non-Small Cell Lung Cancer	Primary	81	3.91488	27	0	NA	0	PR
P-0002806	Wild	Male	46	0:LIVING	>71	Anti-PD-1/PD-L1	P-0002806-T01-IM3	Non-Small Cell Lung Cancer	Primary	82	4.43662	46	0	NA	1	PR
P-0008161	Wild	Male	3	0:LIVING	>71	Anti-PD-1/PD-L1	P-0008161-T01-IM5	Non-Small Cell Lung Cancer	Primary	82	4.8936	3	0	NA	NA	NA
P-0009483	Wild	Female	9	1:DECEASED	>71	Anti-PD-1/PD-L1	P-0009483-T01-IM5	Non-Small Cell Lung Cancer	Primary	82	9.7872	9	1	NA	NA	NA
P-0009638	Wild	Male	2	1:DECEASED	>71	Anti-PD-1/PD-L1	P-0009638-T01-IM5	Non-Small Cell Lung Cancer	Primary	82	18.5957	2	1	NA	NA	NA
P-0012629	Wild	Male	18	1:DECEASED	>71	Anti-PD-1/PD-L1	P-0012629-T01-IM5	Non-Small Cell Lung Cancer	Primary	82	2.93616	18	1	NA	1	SD
P-0004463	Wild	Male	13	1:DECEASED	>71	Anti-PD-1/PD-L1	P-0004463-T01-IM5	Non-Small Cell Lung Cancer	Primary	83	6.85104	13	1	NA	1	PD
P-0007582	Wild	Male	3	1:DECEASED	>71	Anti-PD-1/PD-L1	P-0007582-T01-IM5	Non-Small Cell Lung Cancer	Metastasis	83	4.8936	3	1	NA	1	PD
P-0014172	Wild	Male	9	1:DECEASED	>71	Anti-PD-1/PD-L1	P-0014172-T01-IM5	Non-Small Cell Lung Cancer	Primary	83	17.617	9	1	NA	1	SD
P-0014818	Wild	Male	12	1:DECEASED	>71	Anti-PD-1/PD-L1	P-0014818-T01-IM6	Non-Small Cell Lung Cancer	Metastasis	83	28.535	12	1	NA	1	SD
P-0016290	Wild	Female	2	1:DECEASED	>71	Anti-PD-1/PD-L1	P-0016290-T01-IM6	Non-Small Cell Lung Cancer	Metastasis	83	8.64698	2	1	NA	NA	NA
P-0000702	Wild	Female	2	0:LIVING	>71	Anti-PD-1/PD-L1	P-0000702-T01-IM3	Non-Small Cell Lung Cancer	Primary	85	6.65493	2	0	NA	NA	NA
P-0006415	Wild	Male	12	1:DECEASED	>71	Anti-PD-1/PD-L1	P-0006415-T01-IM5	Non-Small Cell Lung Cancer	Primary	85	4.8936	12	1	NA	1	PD
P-0007420	Wild	Female	8	1:DECEASED	>71	Anti-PD-1/PD-L1	P-0007420-T01-IM5	Non-Small Cell Lung Cancer	Metastasis	85	3.91488	8	1	NA	1	SD
P-0004315	Wild	Female	1	1:DECEASED	>71	Anti-PD-1/PD-L1	P-0004315-T01-IM5	Non-Small Cell Lung Cancer	Metastasis	86	8.80848	1	1	NA	NA	NA
P-0004752	Wild	Male	29	0:LIVING	>71	Anti-PD-1/PD-L1	P-0004752-T01-IM5	Non-Small Cell Lung Cancer	Primary	86	0.97872	29	0	NA	1	PD
P-0012993	Wild	Male	4	1:DECEASED	>71	Anti-PD-1/PD-L1	P-0012993-T01-IM5	Non-Small Cell Lung Cancer	Metastasis	87	5.87232	4	1	NA	NA	NA
P-0015259	Wild	Male	14	0:LIVING	>71	Anti-PD-1/PD-L1	P-0015259-T01-IM6	Non-Small Cell Lung Cancer	Primary	88	2.59409	14	0	NA	NA	NA
P-0015758	Wild	Female	13	0:LIVING	>71	Anti-PD-1/PD-L1	P-0015758-T01-IM6	Non-Small Cell Lung Cancer	Primary	89	5.18819	13	0	NA	0	PR
P-0016875	Wild	Female	1	0:LIVING	>71	Anti-PD-1/PD-L1	P-0016875-T01-IM6	Non-Small Cell Lung Cancer	Metastasis	89	5.18819	1	0	NA	NA	NA
P-0003495	Wild	Female	21	1:DECEASED	>71	Anti-PD-1/PD-L1	P-0003495-T01-IM5	Non-Small Cell Lung Cancer	Primary	90	3.91488	21	1	NA	1	SD
P-0010842	Wild	Male	0	1:DECEASED	>71	Anti-PD-1/PD-L1	P-0010842-T01-IM5	Non-Small Cell Lung Cancer	Primary	NA	0	0	1	NA	NA	NA
P-0006746	Wild	Female	7	1:DECEASED	<30	Anti-PD-1/PD-L1	P-0006746-T01-IM5	Renal Cell Carcinoma	Metastasis	16	0	7	1	NA	NA	NA
P-0000350	Wild	Female	26	1:DECEASED	<30	Anti-PD-1/PD-L1+CTLA-4	P-0000350-T01-IM3	Renal Cell Carcinoma	Metastasis	22	0	26	1	NA	NA	NA
P-0001738	Wild	Male	0	1:DECEASED	<30	Anti-PD-1/PD-L1	P-0001738-T01-IM3	Renal Cell Carcinoma	Primary	24	1.10916	0	1	NA	NA	NA
P-0002270	Wild	Male	16	0:LIVING	31-50	Anti-PD-1/PD-L1	P-0002270-T01-IM3	Renal Cell Carcinoma	Metastasis	33	4.43662	16	0	NA	NA	NA
P-0003406	Wild	Male	13	1:DECEASED	31-50	Anti-PD-1/PD-L1	P-0003406-T01-IM5	Renal Cell Carcinoma	Metastasis	35	2.93616	13	1	NA	NA	NA
P-0004077	Wild	Female	7	1:DECEASED	31-50	Anti-PD-1/PD-L1+CTLA-4	P-0004077-T01-IM5	Renal Cell Carcinoma	Metastasis	36	1.95744	7	1	NA	NA	NA
P-0005808	Wild	Male	48	0:LIVING	31-50	Anti-PD-1/PD-L1	P-0005808-T01-IM5	Renal Cell Carcinoma	Primary	41	4.8936	48	0	NA	NA	NA
P-0005794	Wild	Male	14	0:LIVING	31-50	Anti-PD-1/PD-L1	P-0005794-T01-IM5	Renal Cell Carcinoma	Metastasis	42	1.95744	14	0	NA	NA	NA
P-0013078	Wild	Female	19	0:LIVING	31-50	Anti-PD-1/PD-L1	P-0013078-T01-IM5	Renal Cell Carcinoma	Metastasis	42	2.93616	19	0	NA	NA	NA
P-0004458	Wild	Male	24	0:LIVING	31-50	Anti-PD-1/PD-L1	P-0004458-T01-IM5	Renal Cell Carcinoma	Primary	44	6.85104	24	0	NA	NA	NA
P-0005187	Wild	Female	33	0:LIVING	31-50	Anti-PD-1/PD-L1+CTLA-4	P-0005187-T01-IM5	Renal Cell Carcinoma	Metastasis	44	6.85104	33	0	NA	NA	NA
P-0006539	Wild	Male	21	1:DECEASED	31-50	Anti-PD-1/PD-L1+CTLA-4	P-0006539-T01-IM5	Renal Cell Carcinoma	Primary	44	4.8936	21	1	NA	NA	NA
P-0008005	Wild	Male	27	0:LIVING	31-50	Anti-PD-1/PD-L1	P-0008005-T01-IM5	Renal Cell Carcinoma	Metastasis	45	3.91488	27	0	NA	NA	NA
P-0007310	Wild	Female	31	0:LIVING	31-50	Anti-PD-1/PD-L1+CTLA-4	P-0007310-T01-IM5	Renal Cell Carcinoma	Primary	46	8.80848	31	0	NA	NA	NA
P-0006055	Wild	Female	24	1:DECEASED	31-50	Anti-PD-1/PD-L1+CTLA-4	P-0006055-T01-IM5	Renal Cell Carcinoma	Metastasis	47	5.87232	24	1	NA	NA	NA
P-0006550	Wild	Male	39	0:LIVING	31-50	Anti-PD-1/PD-L1	P-0006550-T01-IM5	Renal Cell Carcinoma	Primary	47	1.95744	39	0	NA	NA	NA
P-0012323	Wild	Female	5	1:DECEASED	31-50	Anti-PD-1/PD-L1	P-0012323-T01-IM5	Renal Cell Carcinoma	Metastasis	47	4.8936	5	1	NA	NA	NA
P-0006935	Wild	Male	30	1:DECEASED	31-50	Anti-PD-1/PD-L1	P-0006935-T01-IM5	Renal Cell Carcinoma	Primary	48	2.93616	30	1	NA	NA	NA
P-0013335	Wild	Male	6	1:DECEASED	31-50	Anti-PD-1/PD-L1	P-0013335-T01-IM5	Renal Cell Carcinoma	Primary	48	1.95744	6	1	NA	NA	NA
P-0009788	Wild	Male	24	0:LIVING	31-50	Anti-PD-1/PD-L1	P-0009788-T01-IM5	Renal Cell Carcinoma	Metastasis	49	1.95744	24	0	NA	NA	NA
P-0002820	Wild	Female	38	0:LIVING	31-50	Anti-PD-1/PD-L1	P-0002820-T01-IM3	Renal Cell Carcinoma	Metastasis	50	4.43662	38	0	NA	NA	NA
P-0002941	Wild	Male	11	1:DECEASED	31-50	Anti-PD-1/PD-L1	P-0002941-T01-IM3	Renal Cell Carcinoma	Metastasis	50	2.21831	11	1	NA	NA	NA
P-0008340	Wild	Female	5	1:DECEASED	31-50	Anti-PD-1/PD-L1	P-0008340-T01-IM5	Renal Cell Carcinoma	Metastasis	50	3.91488	5	1	NA	NA	NA
P-0011095	Wild	Male	24	0:LIVING	31-50	Anti-PD-1/PD-L1	P-0011095-T01-IM5	Renal Cell Carcinoma	Primary	50	0	24	0	NA	NA	NA
P-0004397	Wild	Male	38	0:LIVING	31-50	Anti-PD-1/PD-L1	P-0004397-T01-IM5	Renal Cell Carcinoma	Primary	51	3.91488	38	0	NA	NA	NA
P-0009717	Wild	Male	24	0:LIVING	31-50	Anti-PD-1/PD-L1	P-0009717-T01-IM5	Renal Cell Carcinoma	Primary	51	3.91488	24	0	NA	NA	NA
P-0010791	Wild	Male	24	0:LIVING	31-50	Anti-PD-1/PD-L1	P-0010791-T01-IM5	Renal Cell Carcinoma	Metastasis	51	3.91488	24	0	NA	NA	NA
P-0002940	Wild	Male	17	0:LIVING	50-60	Anti-PD-1/PD-L1	P-0002940-T01-IM3	Renal Cell Carcinoma	Metastasis	52	2.21831	17	0	NA	NA	NA
P-0006904	Wild	Male	78	0:LIVING	31-50	Anti-PD-1/PD-L1	P-0006904-T01-IM5	Renal Cell Carcinoma	Metastasis	52	1.95744	78	0	NA	NA	NA
P-0005177	Wild	Male	19	1:DECEASED	50-60	Anti-PD-1/PD-L1	P-0005177-T01-IM5	Renal Cell Carcinoma	Metastasis	53	0.97872	19	1	NA	NA	NA
P-0006334	Wild	Female	38	0:LIVING	50-60	Anti-PD-1/PD-L1	P-0006334-T01-IM5	Renal Cell Carcinoma	Metastasis	53	2.93616	38	0	NA	NA	NA
P-0006959	Wild	Male	30	0:LIVING	50-60	Anti-PD-1/PD-L1+CTLA-4	P-0006959-T01-IM5	Renal Cell Carcinoma	Metastasis	53	1.95744	30	0	NA	NA	NA
P-0007806	Wild	Female	18	1:DECEASED	50-60	Anti-PD-1/PD-L1+CTLA-4	P-0007806-T01-IM5	Renal Cell Carcinoma	Primary	53	2.93616	18	1	NA	NA	NA
P-0008459	Wild	Male	29	0:LIVING	50-60	Anti-PD-1/PD-L1+CTLA-4	P-0008459-T02-IM5	Renal Cell Carcinoma	Primary	53	0.97872	29	0	NA	NA	NA
P-0008785	Wild	Female	11	1:DECEASED	50-60	Anti-PD-1/PD-L1	P-0008785-T01-IM5	Renal Cell Carcinoma	Primary	53	3.91488	11	1	NA	NA	NA
P-0009706	Wild	Male	26	0:LIVING	50-60	Anti-PD-1/PD-L1	P-0009706-T01-IM5	Renal Cell Carcinoma	Metastasis	53	22.5106	26	0	NA	NA	NA
P-0009906	Wild	Male	24	0:LIVING	50-60	Anti-PD-1/PD-L1	P-0009906-T01-IM5	Renal Cell Carcinoma	Primary	53	3.91488	24	0	NA	NA	NA
P-0003117	Wild	Female	13	1:DECEASED	50-60	Anti-PD-1/PD-L1	P-0003117-T01-IM5	Renal Cell Carcinoma	Primary	54	4.8936	13	1	NA	NA	NA
P-0004294	Wild	Male	7	1:DECEASED	50-60	Anti-PD-1/PD-L1	P-0004294-T01-IM5	Renal Cell Carcinoma	Primary	54	3.91488	7	1	NA	NA	NA
P-0008137	Wild	Male	33	0:LIVING	50-60	Anti-PD-1/PD-L1+CTLA-4	P-0008137-T01-IM5	Renal Cell Carcinoma	Primary	54	2.93616	33	0	NA	NA	NA
P-0009348	Wild	Male	30	0:LIVING	50-60	Anti-PD-1/PD-L1+CTLA-4	P-0009348-T01-IM5	Renal Cell Carcinoma	Metastasis	54	3.91488	30	0	NA	NA	NA
P-0010046	Wild	Female	11	1:DECEASED	50-60	Anti-PD-1/PD-L1	P-0010046-T01-IM5	Renal Cell Carcinoma	Metastasis	54	0.97872	11	1	NA	NA	NA
P-0012221	Wild	Male	23	0:LIVING	50-60	Anti-PD-1/PD-L1	P-0012221-T01-IM5	Renal Cell Carcinoma	Primary	54	3.91488	23	0	NA	NA	NA
P-0003568	Wild	Male	45	0:LIVING	50-60	Anti-PD-1/PD-L1	P-0003568-T01-IM5	Renal Cell Carcinoma	Metastasis	55	3.91488	45	0	NA	NA	NA
P-0004412	Wild	Male	21	0:LIVING	50-60	Anti-PD-1/PD-L1	P-0004412-T01-IM5	Renal Cell Carcinoma	Metastasis	55	3.91488	21	0	NA	NA	NA
P-0007556	Wild	Male	29	0:LIVING	50-60	Anti-PD-1/PD-L1+CTLA-4	P-0007556-T01-IM5	Renal Cell Carcinoma	Primary	55	8.80848	29	0	NA	NA	NA
P-0005226	Wild	Male	29	1:DECEASED	50-60	Anti-PD-1/PD-L1	P-0005226-T01-IM5	Renal Cell Carcinoma	Metastasis	56	2.93616	29	1	NA	NA	NA
P-0006738	Wild	Male	18	0:LIVING	50-60	Anti-PD-1/PD-L1	P-0006738-T01-IM5	Renal Cell Carcinoma	Metastasis	56	3.91488	18	0	NA	NA	NA
P-0008053	Wild	Male	27	0:LIVING	50-60	Anti-PD-1/PD-L1+CTLA-4	P-0008053-T01-IM5	Renal Cell Carcinoma	Metastasis	56	2.93616	27	0	NA	NA	NA
P-0013240	Wild	Male	9	1:DECEASED	50-60	Anti-PD-1/PD-L1	P-0013240-T01-IM5	Renal Cell Carcinoma	Primary	56	3.91488	9	1	NA	NA	NA
P-0002615	Wild	Female	46	0:LIVING	50-60	Anti-PD-1/PD-L1+CTLA-4	P-0002615-T01-IM3	Renal Cell Carcinoma	Primary	57	4.43662	46	0	NA	NA	NA
P-0003721	Wild	Female	35	0:LIVING	50-60	Anti-PD-1/PD-L1+CTLA-4	P-0003721-T01-IM5	Renal Cell Carcinoma	Primary	57	2.93616	35	0	NA	NA	NA
P-0005913	Wild	Male	26	0:LIVING	50-60	Anti-PD-1/PD-L1	P-0005913-T01-IM5	Renal Cell Carcinoma	Primary	57	8.80848	26	0	NA	NA	NA
P-0008964	Wild	Male	21	0:LIVING	50-60	Anti-PD-1/PD-L1	P-0008964-T01-IM5	Renal Cell Carcinoma	Metastasis	57	0.97872	21	0	NA	NA	NA
P-0005822	Wild	Female	4	1:DECEASED	50-60	Anti-PD-1/PD-L1	P-0005822-T01-IM5	Renal Cell Carcinoma	Primary	58	2.93616	4	1	NA	NA	NA
P-0007540	Wild	Female	19	0:LIVING	50-60	Anti-PD-1/PD-L1	P-0007540-T01-IM5	Renal Cell Carcinoma	Primary	58	5.87232	19	0	NA	NA	NA
P-0008830	Wild	Male	21	0:LIVING	50-60	Anti-PD-1/PD-L1	P-0008830-T01-IM5	Renal Cell Carcinoma	Primary	58	1.95744	21	0	NA	NA	NA
P-0003583	Wild	Male	34	0:LIVING	50-60	Anti-PD-1/PD-L1+CTLA-4	P-0003583-T01-IM5	Renal Cell Carcinoma	Metastasis	59	0	34	0	NA	NA	NA
P-0004170	Wild	Male	38	0:LIVING	50-60	Anti-PD-1/PD-L1+CTLA-4	P-0004170-T01-IM5	Renal Cell Carcinoma	Metastasis	59	1.95744	38	0	NA	NA	NA
P-0005954	Wild	Male	38	0:LIVING	50-60	Anti-PD-1/PD-L1	P-0005954-T01-IM5	Renal Cell Carcinoma	Primary	59	2.93616	38	0	NA	NA	NA
P-0006503	Wild	Male	27	1:DECEASED	50-60	Anti-PD-1/PD-L1+CTLA-4	P-0006503-T01-IM5	Renal Cell Carcinoma	Metastasis	59	4.8936	27	1	NA	NA	NA
P-0010184	Wild	Female	25	0:LIVING	50-60	Anti-PD-1/PD-L1	P-0010184-T01-IM5	Renal Cell Carcinoma	Metastasis	59	2.93616	25	0	NA	NA	NA
P-0012682	Wild	Male	23	0:LIVING	50-60	Anti-PD-1/PD-L1	P-0012682-T01-IM5	Renal Cell Carcinoma	Metastasis	59	4.8936	23	0	NA	NA	NA
P-0014147	Wild	Male	10	1:DECEASED	50-60	Anti-PD-1/PD-L1	P-0014147-T01-IM5	Renal Cell Carcinoma	Metastasis	59	6.85104	10	1	NA	NA	NA
P-0003766	Wild	Male	11	1:DECEASED	50-60	Anti-PD-1/PD-L1	P-0003766-T01-IM5	Renal Cell Carcinoma	Primary	60	4.8936	11	1	NA	NA	NA
P-0005354	Wild	Male	44	1:DECEASED	50-60	Anti-PD-1/PD-L1	P-0005354-T01-IM5	Renal Cell Carcinoma	Metastasis	60	5.87232	44	1	NA	NA	NA
P-0006498	Wild	Male	33	1:DECEASED	50-60	Anti-PD-1/PD-L1	P-0006498-T01-IM5	Renal Cell Carcinoma	Metastasis	60	0	33	1	NA	NA	NA
P-0010311	Wild	Male	34	0:LIVING	50-60	Anti-PD-1/PD-L1+CTLA-4	P-0010311-T01-IM5	Renal Cell Carcinoma	Primary	60	7.82976	34	0	NA	NA	NA
P-0013463	Wild	Male	20	0:LIVING	50-60	Anti-PD-1/PD-L1	P-0013463-T01-IM5	Renal Cell Carcinoma	Primary	60	4.8936	20	0	NA	NA	NA
P-0013967	Wild	Male	18	0:LIVING	50-60	Anti-PD-1/PD-L1	P-0013967-T01-IM5	Renal Cell Carcinoma	Metastasis	60	7.82976	18	0	NA	NA	NA
P-0014064	Wild	Male	20	0:LIVING	50-60	Anti-PD-1/PD-L1	P-0014064-T01-IM5	Renal Cell Carcinoma	Metastasis	60	1.95744	20	0	NA	NA	NA
P-0014619	Wild	Male	18	0:LIVING	50-60	Anti-PD-1/PD-L1	P-0014619-T01-IM6	Renal Cell Carcinoma	Primary	60	2.59409	18	0	NA	NA	NA
P-0003003	Wild	Male	22	0:LIVING	61-70	Anti-PD-1/PD-L1	P-0003003-T01-IM3	Renal Cell Carcinoma	Metastasis	61	4.43662	22	0	NA	NA	NA
P-0004813	Wild	Male	39	0:LIVING	50-60	Anti-PD-1/PD-L1	P-0004813-T02-IM5	Renal Cell Carcinoma	Metastasis	61	3.91488	39	0	NA	NA	NA
P-0006222	Wild	Female	24	1:DECEASED	61-70	Anti-PD-1/PD-L1	P-0006222-T01-IM5	Renal Cell Carcinoma	Metastasis	61	4.8936	24	1	NA	NA	NA
P-0006282	Wild	Male	3	1:DECEASED	61-70	Anti-PD-1/PD-L1	P-0006282-T02-IM5	Renal Cell Carcinoma	Primary	61	2.93616	3	1	NA	NA	NA
P-0010963	Wild	Male	3	1:DECEASED	50-60	Anti-PD-1/PD-L1	P-0010963-T01-IM5	Renal Cell Carcinoma	Metastasis	61	0.97872	3	1	NA	NA	NA
P-0012519	Wild	Male	22	0:LIVING	50-60	Anti-PD-1/PD-L1	P-0012519-T01-IM5	Renal Cell Carcinoma	Metastasis	61	4.8936	22	0	NA	NA	NA
P-0013368	Wild	Male	20	0:LIVING	50-60	Anti-PD-1/PD-L1	P-0013368-T01-IM5	Renal Cell Carcinoma	Primary	61	1.95744	20	0	NA	NA	NA
P-0014594	Wild	Male	16	0:LIVING	50-60	Anti-PD-1/PD-L1	P-0014594-T01-IM6	Renal Cell Carcinoma	Primary	61	2.59409	16	0	NA	NA	NA
P-0015342	Wild	Male	18	0:LIVING	50-60	Anti-PD-1/PD-L1	P-0015342-T01-IM6	Renal Cell Carcinoma	Primary	61	1.7294	18	0	NA	NA	NA
P-0001232	Wild	Male	23	0:LIVING	61-70	Anti-PD-1/PD-L1	P-0001232-T01-IM3	Renal Cell Carcinoma	Primary	62	4.43662	23	0	NA	NA	NA
P-0004507	Wild	Male	42	0:LIVING	50-60	Anti-PD-1/PD-L1	P-0004507-T01-IM5	Renal Cell Carcinoma	Primary	62	3.91488	42	0	NA	NA	NA
P-0005965	Wild	Female	19	0:LIVING	61-70	Anti-PD-1/PD-L1	P-0005965-T01-IM5	Renal Cell Carcinoma	Primary	62	3.91488	19	0	NA	NA	NA
P-0006653	Wild	Female	36	1:DECEASED	50-60	Anti-PD-1/PD-L1	P-0006653-T01-IM5	Renal Cell Carcinoma	Primary	62	4.8936	36	1	NA	NA	NA
P-0010212	Wild	Male	9	0:LIVING	61-70	Anti-PD-1/PD-L1	P-0010212-T01-IM5	Renal Cell Carcinoma	Primary	62	3.91488	9	0	NA	NA	NA
P-0010603	Wild	Male	12	0:LIVING	61-70	Anti-PD-1/PD-L1	P-0010603-T01-IM5	Renal Cell Carcinoma	Metastasis	62	4.8936	12	0	NA	NA	NA
P-0012102	Wild	Male	9	1:DECEASED	61-70	Anti-PD-1/PD-L1	P-0012102-T01-IM5	Renal Cell Carcinoma	Primary	62	3.91488	9	1	NA	NA	NA
P-0013728	Wild	Male	46	0:LIVING	50-60	Anti-PD-1/PD-L1+CTLA-4	P-0013728-T01-IM5	Renal Cell Carcinoma	Metastasis	62	1.95744	46	0	NA	NA	NA
P-0002255	Wild	Female	39	0:LIVING	61-70	Anti-PD-1/PD-L1	P-0002255-T01-IM3	Renal Cell Carcinoma	Primary	63	3.32747	39	0	NA	NA	NA
P-0003283	Wild	Male	17	0:LIVING	61-70	Anti-PD-1/PD-L1	P-0003283-T01-IM5	Renal Cell Carcinoma	Primary	63	2.93616	17	0	NA	NA	NA
P-0004561	Wild	Male	8	1:DECEASED	61-70	Anti-PD-1/PD-L1	P-0004561-T01-IM5	Renal Cell Carcinoma	Metastasis	63	6.85104	8	1	NA	NA	NA
P-0005458	Wild	Female	36	0:LIVING	61-70	Anti-PD-1/PD-L1	P-0005458-T01-IM5	Renal Cell Carcinoma	Primary	63	2.93616	36	0	NA	NA	NA
P-0006381	Wild	Male	24	1:DECEASED	61-70	Anti-PD-1/PD-L1	P-0006381-T01-IM5	Renal Cell Carcinoma	Metastasis	63	1.95744	24	1	NA	NA	NA
P-0006639	Wild	Male	44	0:LIVING	61-70	Anti-PD-1/PD-L1	P-0006639-T01-IM5	Renal Cell Carcinoma	Primary	63	2.93616	44	0	NA	NA	NA
P-0007834	Wild	Female	23	0:LIVING	61-70	Anti-PD-1/PD-L1	P-0007834-T01-IM5	Renal Cell Carcinoma	Metastasis	63	6.85104	23	0	NA	NA	NA
P-0007961	Wild	Male	23	1:DECEASED	61-70	Anti-PD-1/PD-L1	P-0007961-T02-IM5	Renal Cell Carcinoma	Primary	63	7.82976	23	1	NA	NA	NA
P-0008522	Wild	Female	16	1:DECEASED	61-70	Anti-PD-1/PD-L1	P-0008522-T01-IM5	Renal Cell Carcinoma	Primary	63	7.82976	16	1	NA	NA	NA
P-0011246	Wild	Female	5	0:LIVING	61-70	Anti-PD-1/PD-L1+CTLA-4	P-0011246-T01-IM5	Renal Cell Carcinoma	Primary	63	2.93616	5	0	NA	NA	NA
P-0012516	Wild	Male	22	0:LIVING	61-70	Anti-PD-1/PD-L1	P-0012516-T01-IM5	Renal Cell Carcinoma	Primary	63	3.91488	22	0	NA	NA	NA
P-0005271	Wild	Male	50	1:DECEASED	61-70	Anti-PD-1/PD-L1	P-0005271-T01-IM5	Renal Cell Carcinoma	Metastasis	64	7.82976	50	1	NA	NA	NA
P-0006586	Wild	Male	11	1:DECEASED	61-70	Anti-PD-1/PD-L1	P-0006586-T01-IM5	Renal Cell Carcinoma	Primary	64	3.91488	11	1	NA	NA	NA
P-0006762	Wild	Female	68	1:DECEASED	50-60	Anti-PD-1/PD-L1	P-0006762-T02-IM5	Renal Cell Carcinoma	Metastasis	64	3.91488	68	1	NA	NA	NA
P-0008399	Wild	Female	34	1:DECEASED	61-70	Anti-PD-1/PD-L1+CTLA-4	P-0008399-T01-IM5	Renal Cell Carcinoma	Metastasis	64	4.8936	34	1	NA	NA	NA
P-0012279	Wild	Male	14	1:DECEASED	61-70	Anti-PD-1/PD-L1	P-0012279-T01-IM5	Renal Cell Carcinoma	Metastasis	64	8.80848	14	1	NA	NA	NA
P-0006095	XMut	Male	6	1:DECEASED	61-70	Anti-PD-1/PD-L1	P-0006095-T01-IM5	Renal Cell Carcinoma	Primary	65	5.87232	6	1	NA	NA	NA
P-0002864	Wild	Male	13	1:DECEASED	61-70	Anti-PD-1/PD-L1+CTLA-4	P-0002864-T01-IM3	Renal Cell Carcinoma	Primary	65	3.32747	13	1	NA	NA	NA
P-0008772	Wild	Male	21	0:LIVING	61-70	Anti-PD-1/PD-L1	P-0008772-T01-IM5	Renal Cell Carcinoma	Primary	65	2.93616	21	0	NA	NA	NA
P-0005332	Wild	Female	20	1:DECEASED	61-70	Anti-PD-1/PD-L1	P-0005332-T01-IM5	Renal Cell Carcinoma	Primary	66	2.93616	20	1	NA	NA	NA
P-0005437	Wild	Female	37	0:LIVING	61-70	Anti-PD-1/PD-L1	P-0005437-T01-IM5	Renal Cell Carcinoma	Primary	66	0	37	0	NA	NA	NA
P-0005682	Wild	Male	20	1:DECEASED	61-70	Anti-PD-1/PD-L1	P-0005682-T01-IM5	Renal Cell Carcinoma	Metastasis	66	3.91488	20	1	NA	NA	NA
P-0005958	Wild	Male	39	0:LIVING	61-70	Anti-PD-1/PD-L1+CTLA-4	P-0005958-T01-IM5	Renal Cell Carcinoma	Primary	66	3.91488	39	0	NA	NA	NA
P-0007399	Wild	Male	28	0:LIVING	61-70	Anti-PD-1/PD-L1+CTLA-4	P-0007399-T01-IM5	Renal Cell Carcinoma	Primary	66	2.93616	28	0	NA	NA	NA
P-0012040	Wild	Male	5	1:DECEASED	61-70	Anti-PD-1/PD-L1	P-0012040-T01-IM5	Renal Cell Carcinoma	Primary	66	3.91488	5	1	NA	NA	NA
P-0015983	Wild	Female	23	0:LIVING	61-70	Anti-PD-1/PD-L1	P-0015983-T01-IM6	Renal Cell Carcinoma	Primary	66	5.18819	23	0	NA	NA	NA
P-0002483	Wild	Female	14	1:DECEASED	61-70	Anti-PD-1/PD-L1	P-0002483-T01-IM3	Renal Cell Carcinoma	Metastasis	67	5.54578	14	1	NA	NA	NA
P-0005593	Wild	Male	59	0:LIVING	61-70	Anti-PD-1/PD-L1	P-0005593-T01-IM5	Renal Cell Carcinoma	Metastasis	67	0.97872	59	0	NA	NA	NA
P-0011418	Wild	Male	22	0:LIVING	61-70	Anti-PD-1/PD-L1	P-0011418-T01-IM5	Renal Cell Carcinoma	Metastasis	67	3.91488	22	0	NA	NA	NA
P-0013089	Wild	Female	9	1:DECEASED	61-70	Anti-PD-1/PD-L1	P-0013089-T01-IM5	Renal Cell Carcinoma	Primary	67	5.87232	9	1	NA	NA	NA
P-0007210	Wild	Female	4	1:DECEASED	61-70	Anti-PD-1/PD-L1	P-0007210-T01-IM5	Renal Cell Carcinoma	Primary	68	2.93616	4	1	NA	NA	NA
P-0008061	Wild	Male	1	1:DECEASED	61-70	Anti-PD-1/PD-L1	P-0008061-T01-IM5	Renal Cell Carcinoma	Metastasis	68	8.80848	1	1	NA	NA	NA
P-0011162	Wild	Male	12	1:DECEASED	61-70	Anti-PD-1/PD-L1	P-0011162-T01-IM5	Renal Cell Carcinoma	Primary	68	3.91488	12	1	NA	NA	NA
P-0015433	Wild	Male	13	0:LIVING	61-70	Anti-PD-1/PD-L1	P-0015433-T01-IM6	Renal Cell Carcinoma	Primary	68	0.864698	13	0	NA	NA	NA
P-0000740	Wild	Female	24	0:LIVING	61-70	Anti-PD-1/PD-L1	P-0000740-T01-IM3	Renal Cell Carcinoma	Primary	69	5.54578	24	0	NA	NA	NA
P-0005747	Wild	Male	29	0:LIVING	61-70	Anti-PD-1/PD-L1	P-0005747-T01-IM5	Renal Cell Carcinoma	Metastasis	69	2.93616	29	0	NA	NA	NA
P-0006510	Wild	Female	43	0:LIVING	61-70	Anti-PD-1/PD-L1	P-0006510-T01-IM5	Renal Cell Carcinoma	Metastasis	69	17.617	43	0	NA	NA	NA
P-0008249	Wild	Male	24	0:LIVING	61-70	Anti-PD-1/PD-L1	P-0008249-T01-IM5	Renal Cell Carcinoma	Primary	69	2.93616	24	0	NA	NA	NA
P-0008537	Wild	Male	3	1:DECEASED	61-70	Anti-PD-1/PD-L1	P-0008537-T01-IM5	Renal Cell Carcinoma	Metastasis	69	0	3	1	NA	NA	NA
P-0012256	Wild	Male	24	0:LIVING	61-70	Anti-PD-1/PD-L1	P-0012256-T01-IM5	Renal Cell Carcinoma	Metastasis	69	6.85104	24	0	NA	NA	NA
P-0005719	Wild	Male	48	0:LIVING	61-70	Anti-PD-1/PD-L1	P-0005719-T01-IM5	Renal Cell Carcinoma	Metastasis	71	3.91488	48	0	NA	NA	NA
P-0006557	Wild	Male	30	0:LIVING	61-70	Anti-PD-1/PD-L1	P-0006557-T01-IM5	Renal Cell Carcinoma	Metastasis	71	8.80848	30	0	NA	NA	NA
P-0005494	Wild	Male	33	0:LIVING	>71	Anti-PD-1/PD-L1+CTLA-4	P-0005494-T01-IM5	Renal Cell Carcinoma	Metastasis	72	0	33	0	NA	NA	NA
P-0005750	Wild	Male	21	0:LIVING	>71	Anti-PD-1/PD-L1	P-0005750-T01-IM5	Renal Cell Carcinoma	Metastasis	72	7.82976	21	0	NA	NA	NA
P-0006239	Wild	Male	42	0:LIVING	>71	Anti-PD-1/PD-L1	P-0006239-T01-IM5	Renal Cell Carcinoma	Primary	72	2.93616	42	0	NA	NA	NA
P-0006392	Wild	Male	25	0:LIVING	>71	Anti-PD-1/PD-L1	P-0006392-T01-IM5	Renal Cell Carcinoma	Primary	72	3.91488	25	0	NA	NA	NA
P-0006542	Wild	Male	32	0:LIVING	>71	Anti-PD-1/PD-L1+CTLA-4	P-0006542-T01-IM5	Renal Cell Carcinoma	Primary	72	9.7872	32	0	NA	NA	NA
P-0009347	Wild	Male	25	0:LIVING	>71	Anti-PD-1/PD-L1+CTLA-4	P-0009347-T01-IM5	Renal Cell Carcinoma	Primary	72	9.7872	25	0	NA	NA	NA
P-0012267	Wild	Female	45	0:LIVING	61-70	Anti-PD-1/PD-L1+CTLA-4	P-0012267-T01-IM5	Renal Cell Carcinoma	Primary	72	3.91488	45	0	NA	NA	NA
P-0004150	Wild	Male	25	0:LIVING	>71	Anti-PD-1/PD-L1	P-0004150-T01-IM5	Renal Cell Carcinoma	Primary	73	5.87232	25	0	NA	NA	NA
P-0004413	Wild	Female	39	0:LIVING	>71	Anti-PD-1/PD-L1	P-0004413-T01-IM5	Renal Cell Carcinoma	Primary	73	1.95744	39	0	NA	NA	NA
P-0014600	Wild	Male	1	1:DECEASED	>71	Anti-PD-1/PD-L1	P-0014600-T01-IM6	Renal Cell Carcinoma	Primary	73	4.32349	1	1	NA	NA	NA
P-0005641	Wild	Male	7	1:DECEASED	>71	Anti-PD-1/PD-L1	P-0005641-T01-IM5	Renal Cell Carcinoma	Primary	76	0.97872	7	1	NA	NA	NA
P-0002976	Wild	Male	21	1:DECEASED	>71	Anti-PD-1/PD-L1	P-0002976-T01-IM3	Renal Cell Carcinoma	Metastasis	77	2.21831	21	1	NA	NA	NA
P-0003645	Wild	Male	3	1:DECEASED	>71	Anti-PD-1/PD-L1	P-0003645-T01-IM5	Renal Cell Carcinoma	Primary	77	4.8936	3	1	NA	NA	NA
P-0005328	Wild	Male	56	0:LIVING	>71	Anti-PD-1/PD-L1	P-0005328-T01-IM5	Renal Cell Carcinoma	Metastasis	78	5.87232	56	0	NA	NA	NA
P-0009517	Wild	Male	23	1:DECEASED	>71	Anti-PD-1/PD-L1	P-0009517-T01-IM5	Renal Cell Carcinoma	Metastasis	79	4.8936	23	1	NA	NA	NA
P-0011097	Wild	Male	17	0:LIVING	>71	Anti-PD-1/PD-L1	P-0011097-T01-IM5	Renal Cell Carcinoma	Primary	79	5.87232	17	0	NA	NA	NA
P-0004376	Wild	Male	49	0:LIVING	>71	Anti-PD-1/PD-L1	P-0004376-T01-IM5	Renal Cell Carcinoma	Primary	80	5.87232	49	0	NA	NA	NA
P-0012137	Wild	Female	4	1:DECEASED	>71	Anti-PD-1/PD-L1	P-0012137-T01-IM5	Renal Cell Carcinoma	Primary	80	0	4	1	NA	NA	NA
P-0011522	Wild	Female	16	0:LIVING	>71	Anti-PD-1/PD-L1	P-0011522-T01-IM5	Renal Cell Carcinoma	Metastasis	81	6.85104	16	0	NA	NA	NA
P-0006220	Wild	Male	1	1:DECEASED	61-70	Anti-PD-1/PD-L1	P-0006220-T01-IM5	Renal Cell Carcinoma	Primary	90	1.95744	1	1	NA	NA	NA

## Sheet: Table S3
Table S3: The clinical data for each sample used in the TCGA cohort.
Sample	Type	NTRK3	Age_at_initial_pathologic_diagnosis	Gender	Race	Ajcc_pathologic_tumor_stage	Vital_status	OS	OS.time	DSS	DSS.time	DFI	DFI.time	PFI	PFI.time	SAMPLE_ID	TMB	MSI
TCGA-OR-A5KB	ACC	Mut	61	FEMALE	WHITE	Stage II	Alive	0	741	0	741	#N/A	#N/A	1	214	TCGA-OR-A5KB-01	62.0667	0.07
TCGA-OR-A5KY	ACC	Mut	23	FEMALE	WHITE	Stage IV	Dead	1	391	1	391	#N/A	#N/A	1	178	TCGA-OR-A5KY-01	0.9	0.93
TCGA-OR-A5J1	ACC	Wild	58	MALE	WHITE	Stage II	Dead	1	1355	1	1355	1	754	1	754	TCGA-OR-A5J1-01	0.8	0
TCGA-OR-A5J2	ACC	Wild	44	FEMALE	WHITE	Stage IV	Dead	1	1677	1	1677	#N/A	#N/A	1	289	TCGA-OR-A5J2-01	0.966667	1.57
TCGA-OR-A5J3	ACC	Wild	23	FEMALE	WHITE	Stage III	Alive	0	2091	0	2091	1	53	1	53	TCGA-OR-A5J3-01	0.333333	1.82
TCGA-OR-A5J4	ACC	Wild	23	FEMALE	WHITE	Stage IV	Dead	1	423	1	423	#N/A	#N/A	1	126	TCGA-OR-A5J4-01	3.86667	0.45
TCGA-OR-A5J5	ACC	Wild	30	MALE	WHITE	Stage III	Dead	1	365	1	365	#N/A	#N/A	1	50	TCGA-OR-A5J5-01	11.8667	5.38
TCGA-OR-A5J6	ACC	Wild	29	FEMALE	BLACK OR AFRICAN AMERICAN	Stage II	Alive	0	2703	0	2703	0	2703	0	2703	TCGA-OR-A5J6-01	1	0
TCGA-OR-A5J7	ACC	Wild	30	FEMALE	WHITE	Stage III	Dead	1	490	1	490	#N/A	#N/A	1	162	TCGA-OR-A5J7-01	1.6	0.79
TCGA-OR-A5J8	ACC	Wild	66	MALE	WHITE	Stage III	Dead	1	579	1	579	1	530	1	530	TCGA-OR-A5J8-01	2.96667	0.64
TCGA-OR-A5J9	ACC	Wild	22	FEMALE	WHITE	Stage II	Alive	0	1352	0	1352	1	414	1	414	TCGA-OR-A5J9-01	1.03333	0.9
TCGA-OR-A5JA	ACC	Wild	53	FEMALE	WHITE	Stage IV	Dead	1	922	1	922	#N/A	#N/A	1	922	TCGA-OR-A5JA-01	15.7667	0.72
TCGA-OR-A5JB	ACC	Wild	52	MALE	WHITE	Stage IV	Dead	1	551	#N/A	551	#N/A	#N/A	0	551	TCGA-OR-A5JB-01	9.4	0.35
TCGA-OR-A5JC	ACC	Wild	37	MALE	WHITE	[Not Available]	Dead	1	1750	#N/A	1750	#N/A	#N/A	0	1750	TCGA-OR-A5JC-01	0.9	0.56
TCGA-OR-A5JD	ACC	Wild	57	FEMALE	WHITE	Stage II	Alive	0	3038	0	3038	0	3038	0	3038	TCGA-OR-A5JD-01	0.866667	0.46
TCGA-OR-A5JE	ACC	Wild	17	FEMALE	WHITE	Stage I	Dead	1	2105	1	2105	#N/A	#N/A	1	477	TCGA-OR-A5JE-01	1.73333	0
TCGA-OR-A5JF	ACC	Wild	69	FEMALE	WHITE	Stage II	Alive	0	2015	0	2015	0	2015	0	2015	TCGA-OR-A5JF-01	2.2	0.91
TCGA-OR-A5JG	ACC	Wild	61	MALE	WHITE	Stage IV	Dead	1	541	1	541	#N/A	#N/A	1	541	TCGA-OR-A5JG-01	0.9	1.45
TCGA-OR-A5JH	ACC	Wild	32	FEMALE	WHITE	Stage II	Alive	0	2110	0	2110	0	2110	0	2110	TCGA-OR-A5JH-01	0.166667	0.01
TCGA-OR-A5JI	ACC	Wild	22	MALE	WHITE	Stage I	Alive	0	2331	0	2331	0	2331	0	2331	TCGA-OR-A5JI-01	0.4	0.01
TCGA-OR-A5JJ	ACC	Wild	65	MALE	WHITE	Stage IV	Dead	1	490	1	490	#N/A	#N/A	1	490	TCGA-OR-A5JJ-01	0.6	1
TCGA-OR-A5JK	ACC	Wild	49	MALE	WHITE	Stage IV	Alive	0	1497	0	1497	#N/A	#N/A	0	1497	TCGA-OR-A5JK-01	0.866667	0.49
TCGA-OR-A5JL	ACC	Wild	36	FEMALE	WHITE	Stage I	Alive	0	2056	0	2056	0	2056	0	2056	TCGA-OR-A5JL-01	0.366667	0.73
TCGA-OR-A5JM	ACC	Wild	25	FEMALE	WHITE	Stage IV	Dead	1	562	1	562	#N/A	#N/A	1	72	TCGA-OR-A5JM-01	2.06667	0.21
TCGA-OR-A5JO	ACC	Wild	26	FEMALE	WHITE	Stage I	Alive	0	1194	0	1194	0	1194	0	1194	TCGA-OR-A5JO-01	0.433333	0.01
TCGA-OR-A5JP	ACC	Wild	40	MALE	WHITE	Stage II	Alive	0	464	0	464	0	464	0	464	TCGA-OR-A5JP-01	2.16667	0.2
TCGA-OR-A5JQ	ACC	Wild	26	FEMALE	WHITE	Stage II	Alive	0	1103	0	1103	0	1103	0	1103	TCGA-OR-A5JQ-01	0.2	0.25
TCGA-OR-A5JR	ACC	Wild	45	MALE	WHITE	Stage I	Alive	0	3688	0	3688	0	3688	0	3688	TCGA-OR-A5JR-01	0.133333	0.88
TCGA-OR-A5JS	ACC	Wild	65	FEMALE	WHITE	Stage II	Alive	0	383	0	383	#N/A	#N/A	1	166	TCGA-OR-A5JS-01	1	0.22
TCGA-OR-A5JT	ACC	Wild	65	FEMALE	WHITE	Stage II	Alive	0	907	0	907	#N/A	#N/A	0	907	TCGA-OR-A5JT-01	0.833333	1.11
TCGA-OR-A5JU	ACC	Wild	58	FEMALE	WHITE	Stage III	Dead	1	289	1	289	#N/A	#N/A	1	268	TCGA-OR-A5JU-01	0.8	0
TCGA-OR-A5JV	ACC	Wild	55	MALE	WHITE	Stage II	Alive	0	2023	0	2023	0	2023	1	953	TCGA-OR-A5JV-01	0.833333	0
TCGA-OR-A5JW	ACC	Wild	47	MALE	WHITE	Stage II	Alive	0	2202	0	2202	0	2202	0	2202	TCGA-OR-A5JW-01	0.9	0.64
TCGA-OR-A5JX	ACC	Wild	50	MALE	WHITE	Stage III	Alive	0	950	0	950	#N/A	#N/A	0	950	TCGA-OR-A5JX-01	1.1	0.52
TCGA-OR-A5JY	ACC	Wild	68	FEMALE	WHITE	Stage IV	Dead	1	552	1	552	#N/A	#N/A	1	75	TCGA-OR-A5JY-01	2.33333	0.49
TCGA-OR-A5JZ	ACC	Wild	60	MALE	WHITE	Stage II	Alive	0	822	0	822	#N/A	#N/A	1	247	TCGA-OR-A5JZ-01	0.5	2.21
TCGA-OR-A5K0	ACC	Wild	69	FEMALE	WHITE	Stage II	Alive	0	1029	0	1029	#N/A	#N/A	1	659	TCGA-OR-A5K0-01	1.66667	0.29
TCGA-OR-A5K1	ACC	Wild	48	MALE	WHITE	Stage II	Alive	0	3289	0	3289	1	826	1	826	TCGA-OR-A5K1-01	0.433333	0.97
TCGA-OR-A5K2	ACC	Wild	32	FEMALE	WHITE	Stage III	Dead	1	994	1	994	#N/A	#N/A	1	97	TCGA-OR-A5K2-01	1.46667	0.03
TCGA-OR-A5K3	ACC	Wild	53	MALE	WHITE	Stage II	Alive	0	3465	0	3465	0	3465	0	3465	TCGA-OR-A5K3-01	0.5	1.36
TCGA-OR-A5K4	ACC	Wild	64	FEMALE	WHITE	Stage III	Alive	0	1082	0	1082	0	1082	0	1082	TCGA-OR-A5K4-01	7.1	2.41
TCGA-OR-A5K5	ACC	Wild	59	FEMALE	WHITE	Stage III	Dead	1	498	1	498	#N/A	#N/A	1	108	TCGA-OR-A5K5-01	3.83333	0.19
TCGA-OR-A5K6	ACC	Wild	56	FEMALE	WHITE	Stage II	Alive	0	1493	0	1493	1	391	1	391	TCGA-OR-A5K6-01	0.833333	0.04
TCGA-OR-A5K8	ACC	Wild	39	MALE	WHITE	Stage II	Alive	0	749	0	749	0	749	0	749	TCGA-OR-A5K8-01	0.833333	1.19
TCGA-OR-A5K9	ACC	Wild	61	FEMALE	WHITE	Stage II	Dead	1	344	1	344	#N/A	#N/A	1	236	TCGA-OR-A5K9-01	3.8	0.75
TCGA-OR-A5KO	ACC	Wild	39	FEMALE	WHITE	Stage IV	Alive	0	1414	0	1414	#N/A	#N/A	1	541	TCGA-OR-A5KO-01	0.966667	1.25
TCGA-OR-A5KP	ACC	Wild	45	FEMALE	WHITE	Stage II	Alive	0	2777	0	2777	1	1250	1	1250	TCGA-OR-A5KP-01	2.06667	0.04
TCGA-OR-A5KQ	ACC	Wild	20	FEMALE	WHITE	Stage II	Alive	0	2677	0	2677	0	2677	0	2677	TCGA-OR-A5KQ-01	0.333333	0
TCGA-OR-A5KS	ACC	Wild	72	MALE	WHITE	Stage II	Alive	0	2549	0	2549	0	2549	0	2549	TCGA-OR-A5KS-01	0.633333	1.09
TCGA-OR-A5KT	ACC	Wild	44	FEMALE	WHITE	Stage I	Alive	0	2895	0	2895	1	2099	1	2099	TCGA-OR-A5KT-01	0.833333	0
TCGA-OR-A5KU	ACC	Wild	37	FEMALE	WHITE	Stage II	Alive	0	4673	0	4673	0	4673	0	4673	TCGA-OR-A5KU-01	0.633333	0.51
TCGA-OR-A5KV	ACC	Wild	17	FEMALE	WHITE	Stage III	Alive	0	3878	0	3878	1	1116	1	1116	TCGA-OR-A5KV-01	0.633333	0.17
TCGA-OR-A5KW	ACC	Wild	55	FEMALE	WHITE	Stage III	Alive	0	2076	0	2076	0	2076	0	2076	TCGA-OR-A5KW-01	0.7	1.77
TCGA-OR-A5KX	ACC	Wild	25	FEMALE	WHITE	Stage III	Alive	0	1364	0	1364	#N/A	#N/A	1	62	TCGA-OR-A5KX-01	1.2	0.17
TCGA-OR-A5KZ	ACC	Wild	42	MALE	WHITE	Stage II	Dead	1	125	1	125	#N/A	#N/A	1	36	TCGA-OR-A5KZ-01	0.933333	1.69
TCGA-OR-A5L1	ACC	Wild	37	FEMALE	WHITE	Stage II	Alive	0	1781	0	1781	1	685	1	685	TCGA-OR-A5L1-01	0.433333	0.87
TCGA-OR-A5L2	ACC	Wild	83	FEMALE	WHITE	Stage II	Dead	1	1852	0	1852	0	1852	0	1852	TCGA-OR-A5L2-01	4.33333	0.2
TCGA-OR-A5L3	ACC	Wild	67	FEMALE	WHITE	Stage I	Alive	0	4628	0	4628	0	4628	0	4628	TCGA-OR-A5L3-01	0.666667	0
TCGA-OR-A5L4	ACC	Wild	48	FEMALE	WHITE	Stage III	Alive	0	967	0	967	0	967	0	967	TCGA-OR-A5L4-01	0.766667	1.29
TCGA-OR-A5L5	ACC	Wild	77	FEMALE	WHITE	Stage I	Alive	0	1317	0	1317	0	1317	0	1317	TCGA-OR-A5L5-01	0.3	0.22
TCGA-OR-A5L6	ACC	Wild	60	MALE	WHITE	Stage II	Alive	0	861	0	861	0	861	0	861	TCGA-OR-A5L6-01	1.23333	2.35
TCGA-OR-A5L8	ACC	Wild	36	FEMALE	WHITE	Stage II	Alive	0	885	0	885	0	885	0	885	TCGA-OR-A5L8-01	0.533333	0.62
TCGA-OR-A5L9	ACC	Wild	53	FEMALE	WHITE	Stage II	Alive	0	871	0	871	0	871	0	871	TCGA-OR-A5L9-01	0.233333	0.66
TCGA-OR-A5LA	ACC	Wild	52	FEMALE	WHITE	Stage II	Alive	0	719	0	719	0	719	0	719	TCGA-OR-A5LA-01	0.233333	0.07
TCGA-OR-A5LB	ACC	Wild	59	MALE	WHITE	Stage IV	Dead	1	1204	1	1204	#N/A	#N/A	1	611	TCGA-OR-A5LB-01	7.53333	5.16
TCGA-OR-A5LC	ACC	Wild	71	FEMALE	WHITE	Stage IV	Dead	1	159	1	159	#N/A	#N/A	1	50	TCGA-OR-A5LC-01	1.46667	0.4
TCGA-OR-A5LD	ACC	Wild	52	MALE	WHITE	Stage III	Dead	1	1197	1	1197	#N/A	#N/A	1	444	TCGA-OR-A5LD-01	1.8	0.05
TCGA-OR-A5LE	ACC	Wild	14	MALE	WHITE	Stage II	Dead	1	662	1	662	#N/A	#N/A	1	265	TCGA-OR-A5LE-01	0.733333	0.05
TCGA-OR-A5LF	ACC	Wild	74	FEMALE	WHITE	Stage III	Dead	1	445	0	445	0	445	0	445	TCGA-OR-A5LF-01	0.7	0.65
TCGA-OR-A5LG	ACC	Wild	46	MALE	WHITE	Stage III	Alive	0	1589	0	1589	1	1393	1	1393	TCGA-OR-A5LG-01	0.6	0.22
TCGA-OR-A5LH	ACC	Wild	36	FEMALE	WHITE	Stage II	Dead	1	2385	1	2385	#N/A	#N/A	1	2385	TCGA-OR-A5LH-01	0.3	1.11
TCGA-OR-A5LI	ACC	Wild	42	FEMALE	WHITE	Stage IV	Dead	1	436	1	436	#N/A	#N/A	1	61	TCGA-OR-A5LI-01	1.66667	0.05
TCGA-OR-A5LJ	ACC	Wild	54	FEMALE	WHITE	Stage IV	Dead	1	1105	1	1105	#N/A	#N/A	1	98	TCGA-OR-A5LJ-01	13.4667	6.52
TCGA-OR-A5LK	ACC	Wild	62	MALE	[Not Evaluated]	Stage II	Alive	0	2740	0	2740	0	2740	0	2740	TCGA-OR-A5LK-01	1.33333	0.24
TCGA-OR-A5LL	ACC	Wild	75	FEMALE	[Not Evaluated]	Stage II	Dead	1	1613	1	1613	1	213	1	213	TCGA-OR-A5LL-01	1.7	0.08
TCGA-OR-A5LM	ACC	Wild	23	MALE	[Not Evaluated]	Stage II	Alive	0	1858	0	1858	0	1858	0	1858	TCGA-OR-A5LM-01	0.8	1.28
TCGA-OR-A5LN	ACC	Wild	31	FEMALE	[Not Evaluated]	Stage II	Alive	0	2342	0	2342	0	2342	0	2342	TCGA-OR-A5LN-01	0.366667	0
TCGA-OR-A5LO	ACC	Wild	61	FEMALE	[Not Evaluated]	Stage II	Dead	1	2405	1	2405	1	153	1	153	TCGA-OR-A5LO-01	2.06667	1.44
TCGA-OR-A5LP	ACC	Wild	37	FEMALE	[Not Evaluated]	Stage II	Alive	0	1857	0	1857	0	1857	0	1857	TCGA-OR-A5LP-01	0.6	0.58
TCGA-OR-A5LR	ACC	Wild	30	FEMALE	[Not Evaluated]	Stage II	Alive	0	853	0	853	0	853	0	853	TCGA-OR-A5LR-01	0.366667	1.33
TCGA-OR-A5LS	ACC	Wild	34	FEMALE	[Not Evaluated]	Stage II	Alive	0	1096	0	1096	0	1096	0	1096	TCGA-OR-A5LS-01	0.366667	0.88
TCGA-OR-A5LT	ACC	Wild	57	MALE	[Not Evaluated]	Stage III	Alive	0	549	0	549	0	549	0	549	TCGA-OR-A5LT-01	0.733333	1.29
TCGA-OU-A5PI	ACC	Wild	53	FEMALE	WHITE	Stage IV	Alive	0	1171	0	1171	#N/A	#N/A	1	351	TCGA-OU-A5PI-01	0.933333	0.53
TCGA-P6-A5OF	ACC	Wild	55	FEMALE	WHITE	Stage III	Dead	1	207	1	207	#N/A	#N/A	1	143	TCGA-P6-A5OF-01	0.933333	0.87
TCGA-P6-A5OH	ACC	Wild	59	FEMALE	WHITE	Stage IV	Dead	1	0	1	0	#N/A	#N/A	1	0	TCGA-P6-A5OH-01	4.2	0.02
TCGA-PA-A5YG	ACC	Wild	51	MALE	WHITE	Stage II	Alive	0	756	0	756	0	756	0	756	TCGA-PA-A5YG-01	0.333333	0.57
TCGA-PK-A5H8	ACC	Wild	42	MALE	WHITE	Stage II	Alive	0	3623	0	3623	0	3623	0	3623	TCGA-PK-A5H8-01	0.666667	1.13
TCGA-PK-A5H9	ACC	Wild	27	FEMALE	ASIAN	Stage II	Alive	0	616	0	616	0	616	0	616	TCGA-PK-A5H9-01	0.5	0
TCGA-PK-A5HA	ACC	Wild	63	MALE	[Unknown]	Stage I	Alive	0	1201	0	1201	0	1201	0	1201	TCGA-PK-A5HA-01	1.6	0.39
TCGA-PK-A5HB	ACC	Wild	63	MALE	[Unknown]	[Not Available]	Alive	0	1293	0	1293	#N/A	#N/A	1	213	TCGA-PK-A5HB-01	32.8333	4.68
TCGA-PK-A5HC	ACC	Wild	44	FEMALE	ASIAN	Stage III	Alive	0	679	0	679	1	131	1	131	TCGA-PK-A5HC-01	1.83333	0.56
TCGA-BT-A20R	BLCA	Mut	79	FEMALE	WHITE	Stage IV	Dead	1	154	#N/A	154	#N/A	#N/A	0	154	TCGA-BT-A20R-01	8.4	0
TCGA-DK-A3IT	BLCA	Mut	62	MALE	WHITE	Stage III	Alive	0	648	0	648	0	648	0	648	TCGA-DK-A3IT-01	13.3	0
TCGA-E7-A85H	BLCA	Mut	64	MALE	ASIAN	Stage III	Alive	0	394	0	394	0	394	0	394	TCGA-E7-A85H-01	12.9	0.32
TCGA-FD-A3N6	BLCA	Mut	43	FEMALE	BLACK OR AFRICAN AMERICAN	Stage II	Alive	0	851	0	851	0	851	0	851	TCGA-FD-A3N6-01	3.7	7.81
TCGA-FD-A3SS	BLCA	Mut	66	MALE	WHITE	Stage IV	Dead	1	391	1	391	#N/A	#N/A	1	220	TCGA-FD-A3SS-01	14.7333	0
TCGA-G2-A2EO	BLCA	Mut	69	MALE	WHITE	Stage III	Dead	1	1804	0	1804	0	1804	0	1804	TCGA-G2-A2EO-01	27.3333	0
TCGA-XF-AAMX	BLCA	Mut	87	FEMALE	BLACK OR AFRICAN AMERICAN	Stage III	Dead	1	206	0	206	0	206	0	206	TCGA-XF-AAMX-01	10	0.97
TCGA-ZF-A9R4	BLCA	Mut	83	MALE	WHITE	Stage II	Alive	0	921	0	921	0	921	0	921	TCGA-ZF-A9R4-01	7.7	0.04
TCGA-ZF-A9R7	BLCA	Mut	76	FEMALE	WHITE	Stage II	Alive	0	665	0	665	0	665	0	665	TCGA-ZF-A9R7-01	21.1667	0.01
TCGA-2F-A9KO	BLCA	Wild	63	MALE	WHITE	Stage IV	Dead	1	734	1	734	#N/A	#N/A	1	651	TCGA-2F-A9KO-01	16.6667	0
TCGA-2F-A9KP	BLCA	Wild	66	MALE	WHITE	Stage IV	Dead	1	364	1	364	#N/A	#N/A	1	343	TCGA-2F-A9KP-01	4.4	0.17
TCGA-2F-A9KQ	BLCA	Wild	69	MALE	WHITE	Stage III	Alive	0	2886	0	2886	0	2886	0	2886	TCGA-2F-A9KQ-01	2.06667	0.12
TCGA-2F-A9KR	BLCA	Wild	59	FEMALE	[Not Evaluated]	Stage III	Dead	1	3183	1	3183	1	3086	1	3086	TCGA-2F-A9KR-01	7	0.14
TCGA-2F-A9KT	BLCA	Wild	83	MALE	WHITE	Stage II	Alive	0	3314	0	3314	0	3314	0	3314	TCGA-2F-A9KT-01	11.3	0
TCGA-2F-A9KW	BLCA	Wild	67	FEMALE	WHITE	Stage III	Dead	1	254	1	254	#N/A	#N/A	1	85	TCGA-2F-A9KW-01	3.16667	0.09
TCGA-4Z-AA7M	BLCA	Wild	65	MALE	WHITE	Stage III	Alive	0	495	0	495	0	495	0	495	TCGA-4Z-AA7M-01	16	0.2
TCGA-4Z-AA7N	BLCA	Wild	65	MALE	WHITE	Stage III	Dead	1	1367	0	1367	0	1367	0	1367	TCGA-4Z-AA7N-01	0.4	0.01
TCGA-4Z-AA7O	BLCA	Wild	64	MALE	BLACK OR AFRICAN AMERICAN	Stage II	Alive	0	512	0	512	0	512	0	512	TCGA-4Z-AA7O-01	5.5	0
TCGA-4Z-AA7Q	BLCA	Wild	79	MALE	WHITE	Stage III	Dead	1	510	0	510	#N/A	#N/A	0	510	TCGA-4Z-AA7Q-01	7.6	0
TCGA-4Z-AA7R	BLCA	Wild	73	MALE	BLACK OR AFRICAN AMERICAN	Stage IV	Dead	1	522	1	522	#N/A	#N/A	1	353	TCGA-4Z-AA7R-01	10.7333	0.38
TCGA-4Z-AA7S	BLCA	Wild	66	MALE	BLACK OR AFRICAN AMERICAN	Stage III	Dead	1	1064	0	1064	#N/A	#N/A	0	1064	TCGA-4Z-AA7S-01	1.96667	0.12
TCGA-4Z-AA7W	BLCA	Wild	55	MALE	WHITE	Stage II	Alive	0	840	0	840	1	760	1	760	TCGA-4Z-AA7W-01	17.3	0.04
TCGA-4Z-AA7Y	BLCA	Wild	60	MALE	WHITE	Stage II	Alive	0	1522	0	1522	0	1522	0	1522	TCGA-4Z-AA7Y-01	8.8	0.01
TCGA-4Z-AA80	BLCA	Wild	73	MALE	WHITE	Stage II	Dead	1	19	0	19	#N/A	#N/A	0	19	TCGA-4Z-AA80-01	12.6667	0.06
TCGA-4Z-AA81	BLCA	Wild	80	MALE	WHITE	Stage II	Dead	1	1270	0	1270	0	1270	0	1270	TCGA-4Z-AA81-01	6.5	0.05
TCGA-4Z-AA82	BLCA	Wild	59	MALE	BLACK OR AFRICAN AMERICAN	Stage IV	Dead	1	1556	1	1556	#N/A	#N/A	1	1150	TCGA-4Z-AA82-01	3.16667	0.02
TCGA-4Z-AA83	BLCA	Wild	52	MALE	WHITE	Stage II	Alive	0	2024	0	2024	0	2024	0	2024	TCGA-4Z-AA83-01	2.53333	0
TCGA-4Z-AA84	BLCA	Wild	61	MALE	WHITE	Stage IV	Alive	0	460	0	460	#N/A	#N/A	0	460	TCGA-4Z-AA84-01	14.1667	0
TCGA-4Z-AA86	BLCA	Wild	66	MALE	BLACK OR AFRICAN AMERICAN	Stage IV	Dead	1	311	1	311	#N/A	#N/A	1	136	TCGA-4Z-AA86-01	6.56667	0
TCGA-4Z-AA87	BLCA	Wild	72	MALE	BLACK OR AFRICAN AMERICAN	Stage III	Alive	0	1454	0	1454	#N/A	#N/A	1	221	TCGA-4Z-AA87-01	7.7	0.16
TCGA-4Z-AA89	BLCA	Wild	60	MALE	WHITE	Stage IV	Alive	0	1029	0	1029	#N/A	#N/A	1	648	TCGA-4Z-AA89-01	4.16667	0.08
TCGA-5N-A9KI	BLCA	Wild	76	FEMALE	WHITE	Stage III	Dead	1	76	0	76	0	76	0	76	TCGA-5N-A9KI-01	5.1	0.02
TCGA-5N-A9KM	BLCA	Wild	73	FEMALE	WHITE	Stage III	Dead	1	530	1	530	1	276	1	276	TCGA-5N-A9KM-01	6.3	0.03
TCGA-BL-A0C8	BLCA	Wild	73	MALE	WHITE	Stage I	Alive	0	1219	0	1219	1	630	1	630	TCGA-BL-A0C8-01	3.66667	1.5
TCGA-BL-A13I	BLCA	Wild	57	FEMALE	WHITE	Stage III	Dead	1	223	1	223	#N/A	#N/A	1	216	TCGA-BL-A13I-01	6.56667	0.32
TCGA-BL-A13J	BLCA	Wild	65	MALE	WHITE	Stage IV	Dead	1	81	1	81	#N/A	#N/A	1	81	TCGA-BL-A13J-01	6.46667	0.64
TCGA-BL-A3JM	BLCA	Wild	62	MALE	WHITE	Stage III	Dead	1	205	1	205	#N/A	#N/A	1	111	TCGA-BL-A3JM-01	6.03333	0.31
TCGA-BL-A5ZZ	BLCA	Wild	80	FEMALE	WHITE	Stage III	Alive	0	377	0	377	1	242	1	242	TCGA-BL-A5ZZ-01	7.73333	0.01
TCGA-BT-A0S7	BLCA	Wild	75	MALE	WHITE	Stage III	Dead	1	200	1	200	#N/A	#N/A	1	200	TCGA-BT-A0S7-01	1.23333	0.13
TCGA-BT-A0YX	BLCA	Wild	70	FEMALE	WHITE	Stage III	Dead	1	400	1	400	#N/A	#N/A	1	326	TCGA-BT-A0YX-01	19.7667	0
TCGA-BT-A20J	BLCA	Wild	75	MALE	WHITE	Stage II	Dead	1	579	1	579	#N/A	#N/A	1	254	TCGA-BT-A20J-01	14.2667	0.03
TCGA-BT-A20N	BLCA	Wild	72	MALE	[Not Available]	Stage III	Dead	1	795	1	795	#N/A	#N/A	1	795	TCGA-BT-A20N-01	7.96667	0.22
TCGA-BT-A20O	BLCA	Wild	75	MALE	WHITE	Stage III	Dead	1	370	1	370	#N/A	#N/A	1	315	TCGA-BT-A20O-01	5.76667	0
TCGA-BT-A20P	BLCA	Wild	81	FEMALE	WHITE	Stage III	Dead	1	544	#N/A	544	#N/A	#N/A	0	544	TCGA-BT-A20P-01	2.9	0.01
TCGA-BT-A20Q	BLCA	Wild	73	MALE	WHITE	Stage IV	Dead	1	593	1	593	#N/A	#N/A	1	593	TCGA-BT-A20Q-01	3	0
TCGA-BT-A20T	BLCA	Wild	63	MALE	WHITE	Stage IV	Dead	1	453	1	453	#N/A	#N/A	1	314	TCGA-BT-A20T-01	7.96667	0.02
TCGA-BT-A20U	BLCA	Wild	70	FEMALE	WHITE	Stage III	Dead	1	455	0	455	0	455	0	455	TCGA-BT-A20U-01	2.83333	0
TCGA-BT-A20V	BLCA	Wild	59	FEMALE	BLACK OR AFRICAN AMERICAN	Stage IV	Dead	1	154	#N/A	154	#N/A	#N/A	0	154	TCGA-BT-A20V-01	3.3	0.39
TCGA-BT-A20W	BLCA	Wild	71	MALE	WHITE	Stage II	Dead	1	254	0	254	0	254	0	254	TCGA-BT-A20W-01	2.8	0
TCGA-BT-A20X	BLCA	Wild	56	MALE	WHITE	Stage IV	Dead	1	251	1	251	#N/A	#N/A	1	251	TCGA-BT-A20X-01	2.3	0
TCGA-BT-A2LA	BLCA	Wild	54	MALE	WHITE	Stage III	Alive	0	522	0	522	0	522	0	522	TCGA-BT-A2LA-01	5.96667	0.47
TCGA-BT-A2LB	BLCA	Wild	73	FEMALE	WHITE	Stage III	Dead	1	492	0	492	0	492	0	492	TCGA-BT-A2LB-01	34.4667	0.03
TCGA-BT-A2LD	BLCA	Wild	78	FEMALE	WHITE	Stage IV	Dead	1	623	1	623	#N/A	#N/A	1	555	TCGA-BT-A2LD-01	3.2	0.02
TCGA-BT-A3PH	BLCA	Wild	76	MALE	WHITE	Stage IV	Dead	1	142	1	142	#N/A	#N/A	1	142	TCGA-BT-A3PH-01	13.9667	0.14
TCGA-BT-A3PJ	BLCA	Wild	76	MALE	WHITE	Stage III	Alive	0	789	0	789	0	789	0	789	TCGA-BT-A3PJ-01	14.8	0
TCGA-BT-A3PK	BLCA	Wild	80	MALE	WHITE	Stage II	Dead	1	303	1	303	#N/A	#N/A	1	303	TCGA-BT-A3PK-01	11.5333	0
TCGA-BT-A42B	BLCA	Wild	59	MALE	WHITE	Stage IV	Dead	1	534	1	534	#N/A	#N/A	1	534	TCGA-BT-A42B-01	1.76667	0.19
TCGA-BT-A42C	BLCA	Wild	64	MALE	WHITE	Stage II	Alive	0	873	0	873	0	873	0	873	TCGA-BT-A42C-01	11.4667	0.2
TCGA-BT-A42E	BLCA	Wild	74	MALE	WHITE	Stage III	Alive	0	1108	0	1108	0	1108	0	1108	TCGA-BT-A42E-01	5.3	0
TCGA-BT-A42F	BLCA	Wild	64	MALE	WHITE	Stage IV	Alive	0	864	0	864	#N/A	#N/A	0	864	TCGA-BT-A42F-01	5.56667	0
TCGA-C4-A0EZ	BLCA	Wild	69	FEMALE	[Not Available]	Stage IV	Dead	1	273	1	273	#N/A	#N/A	1	273	TCGA-C4-A0EZ-01	5.76667	0.34
TCGA-C4-A0F0	BLCA	Wild	60	MALE	[Not Available]	Stage II	Alive	0	59	0	59	#N/A	#N/A	0	59	TCGA-C4-A0F0-01	3	0.23
TCGA-C4-A0F1	BLCA	Wild	71	MALE	[Not Available]	Stage III	Alive	0	89	0	89	#N/A	#N/A	0	89	TCGA-C4-A0F1-01	5.16667	0
TCGA-C4-A0F6	BLCA	Wild	82	FEMALE	[Not Available]	Stage III	Alive	0	700	0	700	#N/A	#N/A	0	700	TCGA-C4-A0F6-01	6.36667	0.4
TCGA-C4-A0F7	BLCA	Wild	77	MALE	[Not Available]	Stage IV	Dead	1	62	1	62	#N/A	#N/A	1	62	TCGA-C4-A0F7-01	2.16667	1.39
TCGA-CF-A1HR	BLCA	Wild	62	MALE	ASIAN	Stage III	Alive	0	389	0	389	1	294	1	294	TCGA-CF-A1HR-01	8.6	0
TCGA-CF-A1HS	BLCA	Wild	75	FEMALE	ASIAN	Stage III	Alive	0	382	0	382	1	133	1	133	TCGA-CF-A1HS-01	8.03333	0.26
TCGA-CF-A27C	BLCA	Wild	52	MALE	ASIAN	Stage III	Alive	0	425	0	425	0	425	0	425	TCGA-CF-A27C-01	4.4	0.09
TCGA-CF-A3MF	BLCA	Wild	34	MALE	ASIAN	Stage III	Alive	0	383	0	383	0	383	0	383	TCGA-CF-A3MF-01	0.766667	1.87
TCGA-CF-A3MG	BLCA	Wild	48	MALE	ASIAN	Stage II	Alive	0	369	0	369	0	369	0	369	TCGA-CF-A3MG-01	4.23333	0.04
TCGA-CF-A3MH	BLCA	Wild	75	MALE	ASIAN	Stage II	Alive	0	398	0	398	0	398	0	398	TCGA-CF-A3MH-01	1.43333	0.07
TCGA-CF-A3MI	BLCA	Wild	62	MALE	ASIAN	Stage II	Alive	0	370	0	370	0	370	0	370	TCGA-CF-A3MI-01	2.1	0.14
TCGA-CF-A47S	BLCA	Wild	41	MALE	ASIAN	Stage II	Alive	0	333	0	333	0	333	0	333	TCGA-CF-A47S-01	0.9	0.05
TCGA-CF-A47T	BLCA	Wild	58	FEMALE	ASIAN	Stage II	Dead	1	385	1	385	1	139	1	139	TCGA-CF-A47T-01	0.9	0.07
TCGA-CF-A47V	BLCA	Wild	52	MALE	ASIAN	Stage II	Alive	0	379	0	379	0	379	0	379	TCGA-CF-A47V-01	2.2	0.02
TCGA-CF-A47W	BLCA	Wild	42	MALE	ASIAN	Stage II	Alive	0	368	0	368	0	368	0	368	TCGA-CF-A47W-01	0.9	0
TCGA-CF-A47X	BLCA	Wild	60	MALE	ASIAN	Stage II	Alive	0	384	0	384	0	384	0	384	TCGA-CF-A47X-01	9.76667	0.02
TCGA-CF-A47Y	BLCA	Wild	55	MALE	ASIAN	Stage II	Alive	0	373	0	373	0	373	0	373	TCGA-CF-A47Y-01	2.03333	0
TCGA-CF-A5U8	BLCA	Wild	59	MALE	ASIAN	Stage II	Alive	0	399	0	399	0	399	0	399	TCGA-CF-A5U8-01	1.53333	0.03
TCGA-CF-A5UA	BLCA	Wild	67	MALE	ASIAN	Stage II	Alive	0	365	0	365	0	365	0	365	TCGA-CF-A5UA-01	2.23333	0.09
TCGA-CF-A7I0	BLCA	Wild	54	MALE	ASIAN	Stage II	Alive	0	368	0	368	0	368	0	368	TCGA-CF-A7I0-01	1.23333	0.01
TCGA-CF-A8HX	BLCA	Wild	55	FEMALE	ASIAN	Stage II	Alive	0	345	0	345	0	345	0	345	TCGA-CF-A8HX-01	1.76667	0.03
TCGA-CF-A8HY	BLCA	Wild	59	MALE	ASIAN	Stage II	Alive	0	345	0	345	0	345	0	345	TCGA-CF-A8HY-01	2.96667	0.16
TCGA-CF-A9FF	BLCA	Wild	52	MALE	ASIAN	Stage II	Alive	0	361	0	361	0	361	0	361	TCGA-CF-A9FF-01	4.4	0.01
TCGA-CF-A9FH	BLCA	Wild	85	MALE	ASIAN	Stage II	Alive	0	0	0	0	0	0	0	0	TCGA-CF-A9FH-01	1.26667	0.33
TCGA-CF-A9FL	BLCA	Wild	85	MALE	ASIAN	Stage III	Dead	1	565	1	565	1	322	1	322	TCGA-CF-A9FL-01	1.9	0
TCGA-CF-A9FM	BLCA	Wild	50	MALE	ASIAN	Stage I	Alive	0	398	0	398	0	398	0	398	TCGA-CF-A9FM-01	0.7	0
TCGA-CU-A0YN	BLCA	Wild	60	MALE	WHITE	Stage III	Dead	1	393	#N/A	393	#N/A	#N/A	0	393	TCGA-CU-A0YN-01	4.86667	0.07
TCGA-CU-A0YO	BLCA	Wild	84	MALE	WHITE	Stage IV	Dead	1	149	1	149	#N/A	#N/A	1	118	TCGA-CU-A0YO-01	3.06667	0.01
TCGA-CU-A0YR	BLCA	Wild	83	MALE	WHITE	Stage IV	Dead	1	460	1	460	#N/A	#N/A	1	219	TCGA-CU-A0YR-01	9.26667	0.05
TCGA-CU-A3KJ	BLCA	Wild	75	MALE	WHITE	Stage III	Alive	0	562	0	562	#N/A	#N/A	1	166	TCGA-CU-A3KJ-01	6.76667	0.35
TCGA-CU-A3QU	BLCA	Wild	58	MALE	WHITE	Stage IV	Alive	0	158	0	158	#N/A	#N/A	0	158	TCGA-CU-A3QU-01	2.86667	0.47
TCGA-CU-A3YL	BLCA	Wild	67	MALE	WHITE	Stage III	Alive	0	906	0	906	1	370	1	370	TCGA-CU-A3YL-01	7.06667	0
TCGA-CU-A5W6	BLCA	Wild	70	MALE	WHITE	Stage III	Dead	1	56	0	56	0	56	0	56	TCGA-CU-A5W6-01	6.66667	0.05
TCGA-CU-A72E	BLCA	Wild	76	MALE	WHITE	Stage IV	Dead	1	413	1	413	#N/A	#N/A	1	256	TCGA-CU-A72E-01	3.03333	0.02
TCGA-DK-A1A3	BLCA	Wild	60	MALE	WHITE	Stage IV	Dead	1	665	1	665	#N/A	#N/A	1	665	TCGA-DK-A1A3-01	18.9	0
TCGA-DK-A1A5	BLCA	Wild	79	MALE	WHITE	Stage II	Dead	1	65	0	65	0	65	0	65	TCGA-DK-A1A5-01	7.93333	1.02
TCGA-DK-A1A6	BLCA	Wild	53	MALE	WHITE	Stage IV	Alive	0	2020	0	2020	#N/A	#N/A	0	2020	TCGA-DK-A1A6-01	0	0.56
TCGA-DK-A1A7	BLCA	Wild	67	FEMALE	WHITE	Stage IV	Alive	0	560	0	560	#N/A	#N/A	1	112	TCGA-DK-A1A7-01	7.26667	0.96
TCGA-DK-A1AA	BLCA	Wild	57	MALE	WHITE	Stage III	Alive	0	578	0	578	0	578	0	578	TCGA-DK-A1AA-01	2.53333	1.25
TCGA-DK-A1AB	BLCA	Wild	74	FEMALE	WHITE	Stage IV	Dead	1	508	#N/A	508	#N/A	#N/A	1	364	TCGA-DK-A1AB-01	5.96667	0
TCGA-DK-A1AC	BLCA	Wild	72	MALE	WHITE	Stage III	Alive	0	3981	0	3981	0	3981	0	3981	TCGA-DK-A1AC-01	43.2333	0.25
TCGA-DK-A1AD	BLCA	Wild	69	MALE	WHITE	Stage IV	Alive	0	3420	0	3420	#N/A	#N/A	0	3420	TCGA-DK-A1AD-01	7.43333	0.5
TCGA-DK-A1AE	BLCA	Wild	84	MALE	WHITE	Stage III	Alive	0	491	0	491	#N/A	#N/A	1	211	TCGA-DK-A1AE-01	3.63333	0
TCGA-DK-A1AF	BLCA	Wild	84	FEMALE	WHITE	Stage IV	Alive	0	536	0	536	#N/A	#N/A	1	283	TCGA-DK-A1AF-01	3.4	0
TCGA-DK-A1AG	BLCA	Wild	65	MALE	WHITE	Stage III	Alive	0	475	0	475	0	475	0	475	TCGA-DK-A1AG-01	3.7	0.1
TCGA-DK-A2HX	BLCA	Wild	80	FEMALE	WHITE	Stage IV	Dead	1	1420	0	1420	#N/A	#N/A	0	1420	TCGA-DK-A2HX-01	3.2	0.03
TCGA-DK-A2I1	BLCA	Wild	73	FEMALE	WHITE	Stage II	Alive	0	546	0	546	0	546	0	546	TCGA-DK-A2I1-01	23.8333	0.25
TCGA-DK-A2I2	BLCA	Wild	63	FEMALE	WHITE	Stage IV	Dead	1	237	1	237	#N/A	#N/A	1	163	TCGA-DK-A2I2-01	13.5667	0.01
TCGA-DK-A2I4	BLCA	Wild	79	MALE	WHITE	Stage III	Alive	0	4343	0	4343	0	4343	0	4343	TCGA-DK-A2I4-01	26.8333	0.19
TCGA-DK-A2I6	BLCA	Wild	81	MALE	WHITE	Stage IV	Alive	0	2656	0	2656	#N/A	#N/A	0	2656	TCGA-DK-A2I6-01	8.26667	0.04
TCGA-DK-A3IK	BLCA	Wild	87	MALE	WHITE	Stage IV	Dead	1	146	0	146	#N/A	#N/A	0	146	TCGA-DK-A3IK-01	6.53333	0.13
TCGA-DK-A3IL	BLCA	Wild	79	FEMALE	WHITE	Stage IV	Dead	1	413	0	413	#N/A	#N/A	0	413	TCGA-DK-A3IL-01	5.8	0.11
TCGA-DK-A3IM	BLCA	Wild	76	MALE	WHITE	Stage III	Dead	1	248	1	248	1	201	1	201	TCGA-DK-A3IM-01	2.53333	0.47
TCGA-DK-A3IN	BLCA	Wild	72	MALE	WHITE	Stage III	Dead	1	250	0	250	0	250	0	250	TCGA-DK-A3IN-01	11.8	0
TCGA-DK-A3IQ	BLCA	Wild	74	MALE	WHITE	Stage III	Dead	1	539	1	539	1	250	1	250	TCGA-DK-A3IQ-01	5.63333	0.03
TCGA-DK-A3IS	BLCA	Wild	68	MALE	WHITE	Stage II	Alive	0	1529	0	1529	0	1529	0	1529	TCGA-DK-A3IS-01	10.3333	0.82
TCGA-DK-A3IU	BLCA	Wild	58	MALE	WHITE	Stage II	Dead	1	706	1	706	1	462	1	462	TCGA-DK-A3IU-01	11.8667	0
TCGA-DK-A3IV	BLCA	Wild	60	MALE	WHITE	Stage II	Dead	1	294	1	294	#N/A	#N/A	1	212	TCGA-DK-A3IV-01	2.53333	0.09
TCGA-DK-A3WW	BLCA	Wild	57	MALE	WHITE	Stage III	Alive	0	633	0	633	0	633	0	633	TCGA-DK-A3WW-01	36.1333	0.22
TCGA-DK-A3WX	BLCA	Wild	67	FEMALE	WHITE	Stage III	Dead	1	321	1	321	#N/A	#N/A	1	167	TCGA-DK-A3WX-01	1.1	0
TCGA-DK-A3WY	BLCA	Wild	67	FEMALE	WHITE	Stage III	Alive	0	4967	0	4967	0	4967	0	4967	TCGA-DK-A3WY-01	0.633333	0
TCGA-DK-A3X1	BLCA	Wild	78	FEMALE	WHITE	Stage III	Alive	0	2009	0	2009	0	2009	0	2009	TCGA-DK-A3X1-01	26.1	0.02
TCGA-DK-A3X2	BLCA	Wild	85	MALE	WHITE	Stage IV	Dead	1	547	1	547	#N/A	#N/A	1	533	TCGA-DK-A3X2-01	4.06667	0.77
TCGA-DK-A6AV	BLCA	Wild	82	FEMALE	ASIAN	Stage II	Alive	0	1952	0	1952	0	1952	0	1952	TCGA-DK-A6AV-01	3.46667	0.03
TCGA-DK-A6AW	BLCA	Wild	70	MALE	WHITE	Stage II	Alive	0	1621	0	1621	0	1621	0	1621	TCGA-DK-A6AW-01	118.633	0.18
TCGA-DK-A6B0	BLCA	Wild	61	MALE	WHITE	Stage II	Alive	0	2330	0	2330	0	2330	0	2330	TCGA-DK-A6B0-01	0.8	0.01
TCGA-DK-A6B1	BLCA	Wild	67	MALE	WHITE	Stage II	Alive	0	2049	0	2049	0	2049	0	2049	TCGA-DK-A6B1-01	4.2	0.15
TCGA-DK-A6B2	BLCA	Wild	70	MALE	WHITE	Stage IV	Alive	0	477	0	477	#N/A	#N/A	1	268	TCGA-DK-A6B2-01	5.73333	0.16
TCGA-DK-A6B5	BLCA	Wild	45	MALE	WHITE	Stage IV	Alive	0	1542	0	1542	#N/A	#N/A	0	1542	TCGA-DK-A6B5-01	3.9	0.06
TCGA-DK-A6B6	BLCA	Wild	57	MALE	WHITE	Stage II	Alive	0	1115	0	1115	0	1115	0	1115	TCGA-DK-A6B6-01	26.6667	0.05
TCGA-DK-AA6L	BLCA	Wild	48	MALE	WHITE	Stage IV	Dead	1	1163	1	1163	#N/A	#N/A	1	920	TCGA-DK-AA6L-01	12.7667	0.02
TCGA-DK-AA6M	BLCA	Wild	64	FEMALE	WHITE	Stage II	Alive	0	1582	0	1582	#N/A	#N/A	0	1582	TCGA-DK-AA6M-01	2.03333	0.03
TCGA-DK-AA6P	BLCA	Wild	72	FEMALE	WHITE	Stage II	Alive	0	457	0	457	#N/A	#N/A	1	16	TCGA-DK-AA6P-01	5.73333	0.48
TCGA-DK-AA6Q	BLCA	Wild	61	FEMALE	WHITE	Stage IV	Dead	1	413	1	413	#N/A	#N/A	1	285	TCGA-DK-AA6Q-01	3.8	0.05
TCGA-DK-AA6R	BLCA	Wild	68	MALE	WHITE	Stage IV	Alive	0	5041	0	5041	#N/A	#N/A	1	4907	TCGA-DK-AA6R-01	11.1	0.05
TCGA-DK-AA6S	BLCA	Wild	60	MALE	WHITE	Stage III	Alive	0	5050	0	5050	1	539	1	539	TCGA-DK-AA6S-01	17.6333	0
TCGA-DK-AA6T	BLCA	Wild	63	MALE	WHITE	Stage II	Alive	0	572	0	572	0	572	0	572	TCGA-DK-AA6T-01	2.83333	0
TCGA-DK-AA6U	BLCA	Wild	64	MALE	WHITE	Stage II	Alive	0	578	0	578	0	578	0	578	TCGA-DK-AA6U-01	13.9667	0.03
TCGA-DK-AA6W	BLCA	Wild	78	MALE	WHITE	Stage II	Dead	1	415	1	415	#N/A	#N/A	1	379	TCGA-DK-AA6W-01	7.76667	0.13
TCGA-DK-AA6X	BLCA	Wild	63	MALE	WHITE	Stage II	Alive	0	467	0	467	#N/A	#N/A	0	467	TCGA-DK-AA6X-01	3.66667	0
TCGA-DK-AA71	BLCA	Wild	71	MALE	WHITE	Stage II	Alive	0	415	0	415	#N/A	#N/A	0	415	TCGA-DK-AA71-01	20	0.03
TCGA-DK-AA74	BLCA	Wild	75	MALE	WHITE	Stage III	Alive	0	1708	0	1708	0	1708	0	1708	TCGA-DK-AA74-01	7.33333	0
TCGA-DK-AA75	BLCA	Wild	82	MALE	WHITE	Stage III	Dead	1	340	1	340	#N/A	#N/A	1	328	TCGA-DK-AA75-01	14	0.16
TCGA-DK-AA76	BLCA	Wild	64	FEMALE	WHITE	Stage II	Alive	0	366	0	366	0	366	0	366	TCGA-DK-AA76-01	7.63333	0.13
TCGA-DK-AA77	BLCA	Wild	61	MALE	WHITE	Stage II	Alive	0	618	0	618	#N/A	#N/A	1	467	TCGA-DK-AA77-01	10.7333	0.13
TCGA-E5-A2PC	BLCA	Wild	61	FEMALE	WHITE	Stage IV	Alive	0	1326	0	1326	#N/A	#N/A	0	1326	TCGA-E5-A2PC-01	6.83333	0.05
TCGA-E5-A4TZ	BLCA	Wild	64	MALE	WHITE	Stage IV	Dead	1	467	1	467	#N/A	#N/A	1	435	TCGA-E5-A4TZ-01	14.0333	1.01
TCGA-E5-A4U1	BLCA	Wild	72	MALE	[Unknown]	Stage II	Alive	0	1181	0	1181	1	705	1	705	TCGA-E5-A4U1-01	18.5	0.28
TCGA-E7-A3X6	BLCA	Wild	70	MALE	WHITE	Stage II	Dead	1	904	1	904	1	369	1	369	TCGA-E7-A3X6-01	3.6	0
TCGA-E7-A3Y1	BLCA	Wild	57	MALE	WHITE	Stage II	Alive	0	163	0	163	0	163	0	163	TCGA-E7-A3Y1-01	5.06667	0.07
TCGA-E7-A4IJ	BLCA	Wild	56	MALE	ASIAN	Stage II	Dead	1	674	1	674	1	620	1	620	TCGA-E7-A4IJ-01	10.1667	0.05
TCGA-E7-A4XJ	BLCA	Wild	66	MALE	ASIAN	Stage II	Dead	1	68	0	68	0	68	0	68	TCGA-E7-A4XJ-01	1.3	0.05
TCGA-E7-A519	BLCA	Wild	72	MALE	WHITE	Stage II	Alive	0	508	0	508	0	508	0	508	TCGA-E7-A519-01	2.23333	0
TCGA-E7-A541	BLCA	Wild	66	MALE	WHITE	Stage II	Dead	1	778	0	778	0	778	0	778	TCGA-E7-A541-01	14.1333	0.02
TCGA-E7-A5KE	BLCA	Wild	78	FEMALE	ASIAN	Stage II	Alive	0	17	0	17	#N/A	#N/A	0	17	TCGA-E7-A5KE-01	5.7	0.5
TCGA-E7-A5KF	BLCA	Wild	67	MALE	ASIAN	Stage II	Alive	0	20	0	20	#N/A	#N/A	0	20	TCGA-E7-A5KF-01	5.76667	0.03
TCGA-E7-A677	BLCA	Wild	81	MALE	ASIAN	Stage II	Alive	0	820	0	820	0	820	0	820	TCGA-E7-A677-01	7.16667	0.06
TCGA-E7-A678	BLCA	Wild	55	MALE	ASIAN	Stage III	Alive	0	798	0	798	0	798	0	798	TCGA-E7-A678-01	1.53333	0.04
TCGA-E7-A6MD	BLCA	Wild	66	MALE	WHITE	Stage IV	Alive	0	129	0	129	#N/A	#N/A	0	129	TCGA-E7-A6MD-01	13.5333	0.01
TCGA-E7-A6ME	BLCA	Wild	75	MALE	ASIAN	Stage II	Alive	0	731	0	731	0	731	0	731	TCGA-E7-A6ME-01	4.1	0.18
TCGA-E7-A6MF	BLCA	Wild	37	MALE	ASIAN	Stage II	Alive	0	750	0	750	0	750	0	750	TCGA-E7-A6MF-01	1.36667	0
TCGA-E7-A7DU	BLCA	Wild	73	MALE	WHITE	Stage III	Alive	0	28	0	28	0	28	0	28	TCGA-E7-A7DU-01	8.26667	0
TCGA-E7-A7DV	BLCA	Wild	44	MALE	WHITE	Stage IV	Alive	0	37	0	37	#N/A	#N/A	0	37	TCGA-E7-A7DV-01	16.5	0.02
TCGA-E7-A7PW	BLCA	Wild	63	MALE	ASIAN	Stage III	Alive	0	416	0	416	1	174	1	174	TCGA-E7-A7PW-01	2.56667	0.16
TCGA-E7-A7XN	BLCA	Wild	66	MALE	ASIAN	Stage III	Alive	0	428	0	428	#N/A	#N/A	1	190	TCGA-E7-A7XN-01	28.8667	0
TCGA-E7-A8O7	BLCA	Wild	52	MALE	ASIAN	Stage II	Alive	0	466	0	466	0	466	0	466	TCGA-E7-A8O7-01	0.833333	0.02
TCGA-E7-A97P	BLCA	Wild	73	MALE	ASIAN	Stage II	Dead	1	437	0	437	0	437	0	437	TCGA-E7-A97P-01	6.43333	0
TCGA-E7-A97Q	BLCA	Wild	60	FEMALE	WHITE	Stage IV	Dead	1	246	1	246	#N/A	#N/A	1	246	TCGA-E7-A97Q-01	2.1	0.01
TCGA-FD-A3B3	BLCA	Wild	74	FEMALE	WHITE	Stage III	Dead	1	974	0	974	0	974	0	974	TCGA-FD-A3B3-01	5.46667	0
TCGA-FD-A3B4	BLCA	Wild	55	FEMALE	BLACK OR AFRICAN AMERICAN	Stage III	Dead	1	510	1	510	1	359	1	359	TCGA-FD-A3B4-01	2.4	0
TCGA-FD-A3B5	BLCA	Wild	86	MALE	BLACK OR AFRICAN AMERICAN	Stage IV	Dead	1	272	1	272	#N/A	#N/A	1	272	TCGA-FD-A3B5-01	4.7	0.38
TCGA-FD-A3B6	BLCA	Wild	75	MALE	WHITE	Stage II	Dead	1	1005	0	1005	0	1005	0	1005	TCGA-FD-A3B6-01	8.56667	0.02
TCGA-FD-A3B7	BLCA	Wild	66	MALE	BLACK OR AFRICAN AMERICAN	Stage III	Dead	1	122	1	122	#N/A	#N/A	1	110	TCGA-FD-A3B7-01	2.23333	0
TCGA-FD-A3B8	BLCA	Wild	56	MALE	WHITE	Stage II	Alive	0	384	0	384	0	384	0	384	TCGA-FD-A3B8-01	1.26667	0
TCGA-FD-A3N5	BLCA	Wild	69	MALE	BLACK OR AFRICAN AMERICAN	Stage II	Dead	1	685	1	685	#N/A	#N/A	1	346	TCGA-FD-A3N5-01	9.3	4.96
TCGA-FD-A3NA	BLCA	Wild	60	MALE	WHITE	Stage II	Alive	0	1845	0	1845	0	1845	1	1338	TCGA-FD-A3NA-01	5.6	0.21
TCGA-FD-A3SJ	BLCA	Wild	59	MALE	WHITE	Stage IV	Dead	1	739	1	739	#N/A	#N/A	1	281	TCGA-FD-A3SJ-01	7.33333	0.01
TCGA-FD-A3SL	BLCA	Wild	60	MALE	WHITE	Stage IV	Dead	1	712	1	712	#N/A	#N/A	1	260	TCGA-FD-A3SL-01	6.86667	0.02
TCGA-FD-A3SM	BLCA	Wild	70	MALE	WHITE	Stage IV	Dead	1	547	1	547	#N/A	#N/A	1	144	TCGA-FD-A3SM-01	6.13333	0
TCGA-FD-A3SN	BLCA	Wild	79	MALE	WHITE	Stage III	Alive	0	887	0	887	#N/A	#N/A	1	110	TCGA-FD-A3SN-01	11.3	0.15
TCGA-FD-A3SO	BLCA	Wild	68	MALE	WHITE	Stage IV	Dead	1	168	1	168	#N/A	#N/A	1	143	TCGA-FD-A3SO-01	10.7667	0
TCGA-FD-A3SP	BLCA	Wild	60	MALE	WHITE	Stage III	Alive	0	783	0	783	0	783	0	783	TCGA-FD-A3SP-01	3.56667	0
TCGA-FD-A3SQ	BLCA	Wild	62	MALE	WHITE	Stage IV	Dead	1	1423	1	1423	#N/A	#N/A	1	991	TCGA-FD-A3SQ-01	2.26667	0
TCGA-FD-A3SR	BLCA	Wild	68	MALE	WHITE	Stage IV	Dead	1	602	1	602	#N/A	#N/A	1	372	TCGA-FD-A3SR-01	4.43333	0.07
TCGA-FD-A43N	BLCA	Wild	76	MALE	WHITE	Stage III	Alive	0	699	0	699	#N/A	#N/A	0	699	TCGA-FD-A43N-01	5.53333	0.05
TCGA-FD-A43P	BLCA	Wild	74	MALE	BLACK OR AFRICAN AMERICAN	Stage II	Alive	0	832	0	832	0	832	0	832	TCGA-FD-A43P-01	12.4667	0.02
TCGA-FD-A43S	BLCA	Wild	71	FEMALE	WHITE	Stage III	Alive	0	455	0	455	0	455	0	455	TCGA-FD-A43S-01	NA	0
TCGA-FD-A43U	BLCA	Wild	70	MALE	WHITE	Stage IV	Alive	0	636	0	636	#N/A	#N/A	1	497	TCGA-FD-A43U-01	2.06667	0.05
TCGA-FD-A43X	BLCA	Wild	84	MALE	WHITE	Stage II	Alive	0	110	0	110	0	110	0	110	TCGA-FD-A43X-01	9.63333	0.02
TCGA-FD-A43Y	BLCA	Wild	65	MALE	WHITE	Stage III	Dead	1	474	0	474	0	474	0	474	TCGA-FD-A43Y-01	1.9	0
TCGA-FD-A5BR	BLCA	Wild	57	MALE	WHITE	Stage II	Alive	0	813	0	813	0	813	0	813	TCGA-FD-A5BR-01	2.9	0
TCGA-FD-A5BS	BLCA	Wild	68	MALE	WHITE	Stage III	Alive	0	1639	0	1639	0	1639	0	1639	TCGA-FD-A5BS-01	0.766667	0
TCGA-FD-A5BT	BLCA	Wild	84	MALE	WHITE	Stage III	Dead	1	328	0	328	#N/A	#N/A	0	328	TCGA-FD-A5BT-01	3.66667	0.03
TCGA-FD-A5BU	BLCA	Wild	76	FEMALE	BLACK OR AFRICAN AMERICAN	Stage II	Alive	0	588	0	588	0	588	0	588	TCGA-FD-A5BU-01	2.33333	0.05
TCGA-FD-A5BV	BLCA	Wild	47	FEMALE	WHITE	Stage III	Dead	1	163	1	163	#N/A	#N/A	1	134	TCGA-FD-A5BV-01	3.7	0.16
TCGA-FD-A5BX	BLCA	Wild	82	MALE	WHITE	Stage IV	Dead	1	173	1	173	#N/A	#N/A	1	99	TCGA-FD-A5BX-01	10.7667	0
TCGA-FD-A5BY	BLCA	Wild	63	FEMALE	WHITE	Stage III	Alive	0	251	0	251	0	251	0	251	TCGA-FD-A5BY-01	1.5	0.14
TCGA-FD-A5BZ	BLCA	Wild	77	FEMALE	WHITE	Stage IV	Dead	1	835	1	835	#N/A	#N/A	1	533	TCGA-FD-A5BZ-01	3.63333	0.01
TCGA-FD-A5C0	BLCA	Wild	61	MALE	WHITE	Stage IV	Dead	1	550	1	550	#N/A	#N/A	1	27	TCGA-FD-A5C0-01	3.73333	0.06
TCGA-FD-A5C1	BLCA	Wild	61	FEMALE	WHITE	Stage III	Alive	0	1792	0	1792	0	1792	0	1792	TCGA-FD-A5C1-01	4.4	0
TCGA-FD-A62N	BLCA	Wild	69	MALE	ASIAN	Stage III	Alive	0	82	0	82	0	82	0	82	TCGA-FD-A62N-01	2.8	0
TCGA-FD-A62O	BLCA	Wild	74	MALE	WHITE	Stage IV	Dead	1	216	0	216	#N/A	#N/A	0	216	TCGA-FD-A62O-01	5.5	0.2
TCGA-FD-A62P	BLCA	Wild	76	MALE	WHITE	Stage II	Dead	1	191	1	191	#N/A	#N/A	1	191	TCGA-FD-A62P-01	12.0333	0
TCGA-FD-A62S	BLCA	Wild	60	FEMALE	BLACK OR AFRICAN AMERICAN	Stage III	Dead	1	406	1	406	#N/A	#N/A	1	306	TCGA-FD-A62S-01	2.36667	0.05
TCGA-FD-A6TA	BLCA	Wild	58	MALE	WHITE	Stage IV	Alive	0	1912	0	1912	#N/A	#N/A	0	1912	TCGA-FD-A6TA-01	8.4	0
TCGA-FD-A6TB	BLCA	Wild	82	MALE	WHITE	Stage III	Alive	0	572	0	572	0	572	0	572	TCGA-FD-A6TB-01	6.13333	0.01
TCGA-FD-A6TC	BLCA	Wild	79	FEMALE	WHITE	Stage III	Alive	0	187	0	187	0	187	0	187	TCGA-FD-A6TC-01	28.9	0.29
TCGA-FD-A6TD	BLCA	Wild	77	MALE	WHITE	Stage III	Dead	1	386	0	386	0	386	0	386	TCGA-FD-A6TD-01	4.03333	0.03
TCGA-FD-A6TE	BLCA	Wild	54	MALE	WHITE	Stage IV	Alive	0	376	0	376	#N/A	#N/A	1	321	TCGA-FD-A6TE-01	8.46667	0.34
TCGA-FD-A6TF	BLCA	Wild	80	FEMALE	WHITE	Stage IV	Dead	1	69	0	69	#N/A	#N/A	0	69	TCGA-FD-A6TF-01	4.3	0
TCGA-FD-A6TG	BLCA	Wild	73	MALE	WHITE	Stage IV	Dead	1	93	0	93	#N/A	#N/A	0	93	TCGA-FD-A6TG-01	12.0667	0.02
TCGA-FD-A6TH	BLCA	Wild	63	MALE	WHITE	Stage IV	Dead	1	131	1	131	#N/A	#N/A	1	126	TCGA-FD-A6TH-01	4.9	0.24
TCGA-FD-A6TI	BLCA	Wild	73	MALE	WHITE	Stage IV	Dead	1	294	0	294	#N/A	#N/A	0	294	TCGA-FD-A6TI-01	3.86667	0
TCGA-FD-A6TK	BLCA	Wild	60	MALE	WHITE	Stage III	Alive	0	330	0	330	0	330	0	330	TCGA-FD-A6TK-01	3.76667	0
TCGA-FJ-A3Z7	BLCA	Wild	76	MALE	WHITE	Stage IV	Alive	0	945	0	945	#N/A	#N/A	0	945	TCGA-FJ-A3Z7-01	9.93333	0.25
TCGA-FJ-A3Z9	BLCA	Wild	72	MALE	WHITE	[Not Available]	Dead	1	385	0	385	0	385	0	385	TCGA-FJ-A3Z9-01	2.23333	0.09
TCGA-FJ-A3ZE	BLCA	Wild	65	MALE	WHITE	Stage IV	Dead	1	324	1	324	#N/A	#N/A	1	152	TCGA-FJ-A3ZE-01	12.5	0.25
TCGA-FJ-A3ZF	BLCA	Wild	73	MALE	WHITE	Stage III	Alive	0	524	0	524	0	524	0	524	TCGA-FJ-A3ZF-01	7.56667	0.33
TCGA-FJ-A871	BLCA	Wild	49	MALE	WHITE	Stage III	Dead	1	272	1	272	#N/A	#N/A	1	106	TCGA-FJ-A871-01	1.5	0.09
TCGA-FT-A3EE	BLCA	Wild	80	FEMALE	WHITE	Stage III	Dead	1	99	0	99	#N/A	#N/A	0	99	TCGA-FT-A3EE-01	3.9	0.06
TCGA-FT-A61P	BLCA	Wild	76	MALE	WHITE	Stage IV	Alive	0	337	0	337	#N/A	#N/A	0	337	TCGA-FT-A61P-01	4.86667	0
TCGA-G2-A2EC	BLCA	Wild	58	FEMALE	BLACK OR AFRICAN AMERICAN	Stage II	Dead	1	696	1	696	#N/A	#N/A	1	679	TCGA-G2-A2EC-01	5.53333	0
TCGA-G2-A2EF	BLCA	Wild	50	MALE	WHITE	Stage II	Alive	0	1884	0	1884	#N/A	#N/A	0	1884	TCGA-G2-A2EF-01	7.9	0.08
TCGA-G2-A2EJ	BLCA	Wild	56	FEMALE	WHITE	Stage II	Alive	0	1460	0	1460	1	910	1	910	TCGA-G2-A2EJ-01	18	0.07
TCGA-G2-A2EK	BLCA	Wild	57	MALE	WHITE	Stage II	Alive	0	485	0	485	#N/A	#N/A	1	485	TCGA-G2-A2EK-01	2.16667	0
TCGA-G2-A2EL	BLCA	Wild	77	MALE	WHITE	Stage II	Dead	1	819	1	819	#N/A	#N/A	1	105	TCGA-G2-A2EL-01	7	0.25
TCGA-G2-A2ES	BLCA	Wild	85	MALE	WHITE	Stage II	Dead	1	1004	1	1004	#N/A	#N/A	1	897	TCGA-G2-A2ES-01	13.7333	0.13
TCGA-G2-A3IB	BLCA	Wild	66	MALE	BLACK OR AFRICAN AMERICAN	Stage II	Dead	1	220	1	220	#N/A	#N/A	1	220	TCGA-G2-A3IB-01	2.86667	0.3
TCGA-G2-A3IE	BLCA	Wild	51	MALE	WHITE	Stage II	Dead	1	612	1	612	#N/A	#N/A	1	612	TCGA-G2-A3IE-01	11.2333	0.11
TCGA-G2-A3VY	BLCA	Wild	66	MALE	ASIAN	Stage II	Alive	0	536	0	536	#N/A	#N/A	0	536	TCGA-G2-A3VY-01	22.3	0.46
TCGA-G2-AA3B	BLCA	Wild	75	FEMALE	WHITE	Stage II	Alive	0	2008	0	2008	0	2008	0	2008	TCGA-G2-AA3B-01	22.1	0.31
TCGA-G2-AA3C	BLCA	Wild	66	MALE	WHITE	Stage IV	Dead	1	211	1	211	#N/A	#N/A	1	211	TCGA-G2-AA3C-01	7.36667	0
TCGA-G2-AA3D	BLCA	Wild	60	MALE	WHITE	Stage IV	Alive	0	2139	0	2139	#N/A	#N/A	0	2139	TCGA-G2-AA3D-01	8.03333	0
TCGA-G2-AA3F	BLCA	Wild	77	MALE	WHITE	Stage IV	Alive	0	893	0	893	#N/A	#N/A	0	893	TCGA-G2-AA3F-01	4.4	0.07
TCGA-GC-A3BM	BLCA	Wild	70	MALE	WHITE	Stage II	Dead	1	651	1	651	#N/A	#N/A	1	651	TCGA-GC-A3BM-01	6.76667	0.21
TCGA-GC-A3I6	BLCA	Wild	45	MALE	WHITE	Stage III	Dead	1	630	1	630	#N/A	#N/A	1	546	TCGA-GC-A3I6-01	5.73333	0.02
TCGA-GC-A3OO	BLCA	Wild	79	MALE	WHITE	Stage II	Alive	0	481	0	481	0	481	0	481	TCGA-GC-A3OO-01	3.86667	0
TCGA-GC-A3RB	BLCA	Wild	54	MALE	WHITE	Stage III	Alive	0	582	0	582	0	582	0	582	TCGA-GC-A3RB-01	5.13333	0.07
TCGA-GC-A3RC	BLCA	Wild	59	MALE	WHITE	Stage II	Alive	0	484	0	484	0	484	0	484	TCGA-GC-A3RC-01	10.4	0
TCGA-GC-A3RD	BLCA	Wild	83	FEMALE	WHITE	Stage III	Alive	0	428	0	428	0	428	0	428	TCGA-GC-A3RD-01	2.5	0.33
TCGA-GC-A3WC	BLCA	Wild	80	FEMALE	WHITE	Stage III	Alive	0	540	0	540	0	540	0	540	TCGA-GC-A3WC-01	9.16667	0.02
TCGA-GC-A3YS	BLCA	Wild	61	MALE	WHITE	Stage IV	Alive	0	758	0	758	#N/A	#N/A	0	758	TCGA-GC-A3YS-01	7.3	0.23
TCGA-GC-A4ZW	BLCA	Wild	71	MALE	WHITE	Stage III	Alive	0	15	0	15	#N/A	#N/A	0	15	TCGA-GC-A4ZW-01	20.7	0.05
TCGA-GC-A6I1	BLCA	Wild	90	FEMALE	WHITE	Stage II	Dead	1	272	0	272	0	272	0	272	TCGA-GC-A6I1-01	7.06667	0
TCGA-GC-A6I3	BLCA	Wild	90	FEMALE	BLACK OR AFRICAN AMERICAN	Stage IV	Alive	0	423	0	423	#N/A	#N/A	0	423	TCGA-GC-A6I3-01	11.7333	0
TCGA-GD-A2C5	BLCA	Wild	53	FEMALE	WHITE	Stage IV	Alive	0	812	0	812	#N/A	#N/A	1	214	TCGA-GD-A2C5-01	13.3333	0.16
TCGA-GD-A3OP	BLCA	Wild	84	FEMALE	WHITE	Stage IV	Alive	0	64	0	64	#N/A	#N/A	0	64	TCGA-GD-A3OP-01	22.1333	0
TCGA-GD-A3OQ	BLCA	Wild	48	MALE	WHITE	Stage IV	Alive	0	95	0	95	#N/A	#N/A	0	95	TCGA-GD-A3OQ-01	7.13333	0.08
TCGA-GD-A3OS	BLCA	Wild	54	FEMALE	WHITE	Stage II	Alive	0	638	0	638	#N/A	#N/A	1	223	TCGA-GD-A3OS-01	2.83333	0.09
TCGA-GD-A6C6	BLCA	Wild	64	MALE	WHITE	Stage III	Alive	0	67	0	67	0	67	0	67	TCGA-GD-A6C6-01	7.73333	1.24
TCGA-GD-A76B	BLCA	Wild	86	FEMALE	WHITE	Stage II	Alive	0	224	0	224	0	224	0	224	TCGA-GD-A76B-01	6.03333	0
TCGA-GU-A42P	BLCA	Wild	72	MALE	WHITE	Stage IV	Dead	1	332	0	332	#N/A	#N/A	0	332	TCGA-GU-A42P-01	7.26667	0.33
TCGA-GU-A42Q	BLCA	Wild	67	MALE	WHITE	Stage III	Dead	1	344	0	344	0	344	0	344	TCGA-GU-A42Q-01	5.56667	0
TCGA-GU-A42R	BLCA	Wild	68	MALE	WHITE	Stage IV	Dead	1	577	1	577	#N/A	#N/A	1	91	TCGA-GU-A42R-01	4.33333	0.31
TCGA-GU-A762	BLCA	Wild	87	MALE	WHITE	Stage IV	Dead	1	232	1	232	#N/A	#N/A	1	232	TCGA-GU-A762-01	3.56667	0
TCGA-GU-A763	BLCA	Wild	72	MALE	WHITE	Stage III	Alive	0	997	0	997	#N/A	#N/A	1	303	TCGA-GU-A763-01	1.93333	0
TCGA-GU-A764	BLCA	Wild	66	MALE	WHITE	Stage II	Alive	0	610	0	610	0	610	0	610	TCGA-GU-A764-01	3.86667	0
TCGA-GU-A766	BLCA	Wild	62	MALE	WHITE	Stage II	Alive	0	480	0	480	#N/A	#N/A	0	480	TCGA-GU-A766-01	5.6	0.02
TCGA-GU-A767	BLCA	Wild	81	MALE	WHITE	Stage IV	Dead	1	144	1	144	#N/A	#N/A	1	144	TCGA-GU-A767-01	12.2	0
TCGA-GU-AATO	BLCA	Wild	75	MALE	WHITE	Stage IV	Dead	1	324	1	324	#N/A	#N/A	1	324	TCGA-GU-AATO-01	9.76667	0.05
TCGA-GU-AATP	BLCA	Wild	74	MALE	WHITE	Stage IV	Alive	0	1003	0	1003	#N/A	#N/A	1	596	TCGA-GU-AATP-01	9.96667	0.1
TCGA-GU-AATQ	BLCA	Wild	68	MALE	WHITE	Stage III	Dead	1	213	1	213	#N/A	#N/A	1	213	TCGA-GU-AATQ-01	4.93333	0.1
TCGA-GV-A3JV	BLCA	Wild	66	MALE	WHITE	Stage IV	Dead	1	434	1	434	#N/A	#N/A	1	134	TCGA-GV-A3JV-01	3.7	0.04
TCGA-GV-A3JW	BLCA	Wild	74	MALE	WHITE	Stage II	Alive	0	649	0	649	#N/A	#N/A	1	271	TCGA-GV-A3JW-01	2.4	0.22
TCGA-GV-A3JX	BLCA	Wild	59	MALE	WHITE	Stage III	Alive	0	581	0	581	0	581	0	581	TCGA-GV-A3JX-01	9.26667	0.39
TCGA-GV-A3JZ	BLCA	Wild	55	MALE	WHITE	Stage IV	Alive	0	603	0	603	#N/A	#N/A	0	603	TCGA-GV-A3JZ-01	14.1	0.51
TCGA-GV-A3QF	BLCA	Wild	79	MALE	WHITE	Stage IV	Dead	1	617	0	617	#N/A	#N/A	0	617	TCGA-GV-A3QF-01	4.23333	0
TCGA-GV-A3QG	BLCA	Wild	65	MALE	WHITE	Stage IV	Dead	1	#N/A	1	#N/A	#N/A	#N/A	1	84	TCGA-GV-A3QG-01	3.03333	0
TCGA-GV-A3QH	BLCA	Wild	67	MALE	WHITE	Stage II	Dead	1	258	0	258	#N/A	#N/A	1	125	TCGA-GV-A3QH-01	5.23333	0.04
TCGA-GV-A3QI	BLCA	Wild	47	MALE	WHITE	Stage III	Alive	0	1110	0	1110	1	768	1	768	TCGA-GV-A3QI-01	14	0.27
TCGA-GV-A3QK	BLCA	Wild	56	FEMALE	WHITE	Stage IV	Alive	0	832	0	832	#N/A	#N/A	0	832	TCGA-GV-A3QK-01	4.13333	0.19
TCGA-GV-A40E	BLCA	Wild	75	MALE	WHITE	Stage II	Dead	1	261	1	261	#N/A	#N/A	1	219	TCGA-GV-A40E-01	4.73333	0.07
TCGA-GV-A40G	BLCA	Wild	77	MALE	WHITE	Stage II	Alive	0	580	0	580	0	580	0	580	TCGA-GV-A40G-01	4.93333	0.38
TCGA-GV-A6ZA	BLCA	Wild	54	MALE	WHITE	Stage II	Alive	0	691	0	691	0	691	0	691	TCGA-GV-A6ZA-01	9.73333	0.04
TCGA-H4-A2HO	BLCA	Wild	53	MALE	WHITE	Stage III	Alive	0	46	0	46	0	46	0	46	TCGA-H4-A2HO-01	11.3333	0
TCGA-H4-A2HQ	BLCA	Wild	64	FEMALE	BLACK OR AFRICAN AMERICAN	Stage IV	Alive	0	590	0	590	#N/A	#N/A	1	318	TCGA-H4-A2HQ-01	14.2333	0.68
TCGA-HQ-A2OE	BLCA	Wild	69	MALE	[Not Evaluated]	[Not Available]	Alive	0	1174	0	1174	#N/A	#N/A	0	1174	TCGA-HQ-A2OE-01	4.66667	0.11
TCGA-HQ-A2OF	BLCA	Wild	52	FEMALE	[Not Evaluated]	Stage III	Alive	0	1947	0	1947	1	907	1	907	TCGA-HQ-A2OF-01	3.23333	0.3
TCGA-HQ-A5ND	BLCA	Wild	78	MALE	[Not Evaluated]	Stage IV	Dead	1	274	1	274	#N/A	#N/A	1	84	TCGA-HQ-A5ND-01	2.63333	0.11
TCGA-HQ-A5NE	BLCA	Wild	57	MALE	[Not Evaluated]	Stage III	Dead	1	370	1	370	1	211	1	211	TCGA-HQ-A5NE-01	11.2667	0
TCGA-K4-A3WS	BLCA	Wild	66	MALE	WHITE	Stage III	Alive	0	761	0	761	0	761	0	761	TCGA-K4-A3WS-01	8.86667	0
TCGA-K4-A3WU	BLCA	Wild	87	MALE	WHITE	Stage III	Alive	0	105	0	105	#N/A	#N/A	0	105	TCGA-K4-A3WU-01	6	0.07
TCGA-K4-A3WV	BLCA	Wild	77	FEMALE	WHITE	Stage II	Alive	0	646	0	646	#N/A	#N/A	0	646	TCGA-K4-A3WV-01	3.83333	0.17
TCGA-K4-A4AB	BLCA	Wild	76	MALE	WHITE	Stage III	Alive	0	84	0	84	#N/A	#N/A	0	84	TCGA-K4-A4AB-01	2.93333	0.19
TCGA-K4-A4AC	BLCA	Wild	83	MALE	WHITE	Stage II	Dead	1	278	1	278	#N/A	#N/A	1	170	TCGA-K4-A4AC-01	4.56667	0
TCGA-K4-A54R	BLCA	Wild	59	MALE	WHITE	Stage II	Alive	0	842	0	842	0	842	0	842	TCGA-K4-A54R-01	55.8333	0
TCGA-K4-A5RH	BLCA	Wild	69	MALE	WHITE	Stage III	Alive	0	276	0	276	#N/A	#N/A	1	196	TCGA-K4-A5RH-01	11.3333	0.09
TCGA-K4-A5RI	BLCA	Wild	67	FEMALE	WHITE	Stage III	Dead	1	356	1	356	#N/A	#N/A	1	236	TCGA-K4-A5RI-01	8.2	0.29
TCGA-K4-A5RJ	BLCA	Wild	75	MALE	WHITE	Stage II	Alive	0	539	0	539	0	539	0	539	TCGA-K4-A5RJ-01	10.7	0.01
TCGA-K4-A6FZ	BLCA	Wild	75	FEMALE	WHITE	Stage III	Alive	0	55	0	55	0	55	0	55	TCGA-K4-A6FZ-01	23.9	0
TCGA-K4-A6MB	BLCA	Wild	64	MALE	WHITE	Stage IV	Alive	0	469	0	469	#N/A	#N/A	0	469	TCGA-K4-A6MB-01	10.0667	0.3
TCGA-K4-A83P	BLCA	Wild	77	MALE	WHITE	Stage IV	Alive	0	495	0	495	#N/A	#N/A	1	70	TCGA-K4-A83P-01	15.5333	0
TCGA-K4-AAQO	BLCA	Wild	56	MALE	WHITE	Stage III	Alive	0	359	0	359	#N/A	#N/A	0	359	TCGA-K4-AAQO-01	7.73333	0
TCGA-KQ-A41N	BLCA	Wild	73	MALE	BLACK OR AFRICAN AMERICAN	Stage III	Alive	0	1604	0	1604	0	1604	0	1604	TCGA-KQ-A41N-01	84.6	0
TCGA-KQ-A41O	BLCA	Wild	84	MALE	[Unknown]	Stage IV	Alive	0	1538	0	1538	#N/A	#N/A	0	1538	TCGA-KQ-A41O-01	7.06667	0.17
TCGA-KQ-A41P	BLCA	Wild	76	MALE	WHITE	Stage IV	Alive	0	1094	0	1094	#N/A	#N/A	1	178	TCGA-KQ-A41P-01	9.3	0.37
TCGA-KQ-A41Q	BLCA	Wild	89	MALE	WHITE	Stage III	Alive	0	1429	0	1429	#N/A	#N/A	1	1314	TCGA-KQ-A41Q-01	7.73333	0.15
TCGA-KQ-A41R	BLCA	Wild	80	FEMALE	WHITE	Stage II	Alive	0	1350	0	1350	0	1350	0	1350	TCGA-KQ-A41R-01	22.7667	0.06
TCGA-KQ-A41S	BLCA	Wild	87	FEMALE	WHITE	Stage III	Alive	0	35	0	35	0	35	0	35	TCGA-KQ-A41S-01	7.93333	0.03
TCGA-LC-A66R	BLCA	Wild	78	MALE	WHITE	Stage IV	Alive	0	466	0	466	#N/A	#N/A	0	466	TCGA-LC-A66R-01	4.23333	0.04
TCGA-LT-A5Z6	BLCA	Wild	56	MALE	WHITE	Stage II	Alive	0	474	0	474	0	474	0	474	TCGA-LT-A5Z6-01	15.3667	0.23
TCGA-LT-A8JT	BLCA	Wild	69	FEMALE	WHITE	Stage II	Alive	0	641	0	641	0	641	0	641	TCGA-LT-A8JT-01	2.36667	0
TCGA-MV-A51V	BLCA	Wild	75	MALE	WHITE	Stage III	Alive	0	410	0	410	0	410	0	410	TCGA-MV-A51V-01	47.6	0
TCGA-PQ-A6FI	BLCA	Wild	70	MALE	WHITE	Stage II	Alive	0	372	0	372	0	372	0	372	TCGA-PQ-A6FI-01	4.76667	0.6
TCGA-PQ-A6FN	BLCA	Wild	78	FEMALE	WHITE	Stage III	Alive	0	507	0	507	#N/A	#N/A	0	507	TCGA-PQ-A6FN-01	2.53333	0
TCGA-R3-A69X	BLCA	Wild	70	MALE	WHITE	Stage III	Alive	0	433	0	433	0	433	0	433	TCGA-R3-A69X-01	6.66667	0
TCGA-S5-A6DX	BLCA	Wild	83	MALE	WHITE	Stage IV	Dead	1	56	1	56	#N/A	#N/A	1	56	TCGA-S5-A6DX-01	20.0667	0.06
TCGA-S5-AA26	BLCA	Wild	46	MALE	BLACK OR AFRICAN AMERICAN	Stage III	Alive	0	503	0	503	0	503	0	503	TCGA-S5-AA26-01	7.13333	0.35
TCGA-SY-A9G0	BLCA	Wild	82	MALE	WHITE	Stage IV	Dead	1	1008	0	1008	#N/A	#N/A	0	1008	TCGA-SY-A9G0-01	1.53333	0
TCGA-SY-A9G5	BLCA	Wild	66	MALE	WHITE	Stage III	Alive	0	1186	0	1186	0	1186	0	1186	TCGA-SY-A9G5-01	31	0
TCGA-UY-A78K	BLCA	Wild	60	MALE	WHITE	Stage IV	Dead	1	536	#N/A	536	#N/A	#N/A	0	536	TCGA-UY-A78K-01	25.7667	0.08
TCGA-UY-A78L	BLCA	Wild	62	MALE	WHITE	Stage IV	Alive	0	1127	0	1127	#N/A	#N/A	1	355	TCGA-UY-A78L-01	6.26667	0.03
TCGA-UY-A78M	BLCA	Wild	81	FEMALE	ASIAN	Stage IV	Dead	1	690	1	690	#N/A	#N/A	1	690	TCGA-UY-A78M-01	4.9	0.03
TCGA-UY-A78N	BLCA	Wild	80	MALE	WHITE	Stage IV	Dead	1	2641	1	2641	#N/A	#N/A	1	2472	TCGA-UY-A78N-01	8.9	0.15
TCGA-UY-A78O	BLCA	Wild	75	FEMALE	WHITE	Stage II	Alive	0	2312	0	2312	0	2312	0	2312	TCGA-UY-A78O-01	5.86667	0.05
TCGA-UY-A78P	BLCA	Wild	78	FEMALE	WHITE	Stage II	Alive	0	2380	0	2380	0	2380	0	2380	TCGA-UY-A78P-01	8.53333	0
TCGA-UY-A8OB	BLCA	Wild	63	MALE	WHITE	Stage IV	Alive	0	2109	0	2109	#N/A	#N/A	0	2109	TCGA-UY-A8OB-01	10.4667	0.27
TCGA-UY-A8OC	BLCA	Wild	90	MALE	WHITE	Stage IV	Dead	1	92	1	92	#N/A	#N/A	1	32	TCGA-UY-A8OC-01	2.9	0
TCGA-UY-A8OD	BLCA	Wild	68	FEMALE	BLACK OR AFRICAN AMERICAN	Stage II	Alive	0	3432	0	3432	0	3432	0	3432	TCGA-UY-A8OD-01	2.93333	0.11
TCGA-UY-A9PA	BLCA	Wild	48	MALE	WHITE	Stage III	Alive	0	1072	0	1072	0	1072	0	1072	TCGA-UY-A9PA-01	5.33333	0.01
TCGA-UY-A9PB	BLCA	Wild	49	MALE	WHITE	Stage III	Alive	0	899	0	899	0	899	0	899	TCGA-UY-A9PB-01	16.7333	0
TCGA-UY-A9PD	BLCA	Wild	80	MALE	WHITE	Stage III	Alive	0	542	0	542	0	542	0	542	TCGA-UY-A9PD-01	8.76667	0.09
TCGA-UY-A9PE	BLCA	Wild	86	MALE	WHITE	Stage IV	Alive	0	189	0	189	#N/A	#N/A	1	473	TCGA-UY-A9PE-01	6.73333	0.05
TCGA-UY-A9PF	BLCA	Wild	77	MALE	WHITE	Stage IV	Alive	0	117	0	117	#N/A	#N/A	0	117	TCGA-UY-A9PF-01	13.9333	0
TCGA-UY-A9PH	BLCA	Wild	73	MALE	WHITE	Stage II	Alive	0	1561	0	1561	0	1561	0	1561	TCGA-UY-A9PH-01	10.9	0.05
TCGA-XF-A8HB	BLCA	Wild	50	FEMALE	[Unknown]	Stage II	Alive	0	1370	0	1370	0	1370	0	1370	TCGA-XF-A8HB-01	2.33333	0
TCGA-XF-A8HC	BLCA	Wild	79	MALE	ASIAN	Stage IV	Dead	1	200	#N/A	200	#N/A	#N/A	0	200	TCGA-XF-A8HC-01	3.9	0.16
TCGA-XF-A8HD	BLCA	Wild	77	MALE	WHITE	Stage III	Alive	0	2964	0	2964	0	2964	0	2964	TCGA-XF-A8HD-01	14.3333	0.01
TCGA-XF-A8HE	BLCA	Wild	47	MALE	WHITE	Stage III	Alive	0	3817	0	3817	0	3817	0	3817	TCGA-XF-A8HE-01	12.7333	0
TCGA-XF-A8HF	BLCA	Wild	80	MALE	WHITE	Stage III	Dead	1	2954	0	2954	0	2954	0	2954	TCGA-XF-A8HF-01	4.86667	0
TCGA-XF-A8HG	BLCA	Wild	69	MALE	WHITE	Stage III	Dead	1	467	1	467	1	398	1	398	TCGA-XF-A8HG-01	9.1	1.05
TCGA-XF-A8HH	BLCA	Wild	61	FEMALE	WHITE	Stage IV	Dead	1	57	1	57	#N/A	#N/A	1	57	TCGA-XF-A8HH-01	2.8	0.03
TCGA-XF-A8HI	BLCA	Wild	57	FEMALE	WHITE	Stage IV	Dead	1	544	1	544	#N/A	#N/A	1	468	TCGA-XF-A8HI-01	2.2	0
TCGA-XF-A9SG	BLCA	Wild	81	MALE	[Unknown]	Stage II	Alive	0	1479	0	1479	0	1479	0	1479	TCGA-XF-A9SG-01	5.96667	0
TCGA-XF-A9SH	BLCA	Wild	65	FEMALE	ASIAN	Stage II	Dead	1	1971	1	1971	#N/A	#N/A	1	547	TCGA-XF-A9SH-01	1.26667	0
TCGA-XF-A9SI	BLCA	Wild	73	FEMALE	ASIAN	Stage II	Alive	0	2423	0	2423	0	2423	0	2423	TCGA-XF-A9SI-01	10.8	0
TCGA-XF-A9SJ	BLCA	Wild	83	MALE	WHITE	Stage IV	Dead	1	98	1	98	#N/A	#N/A	1	98	TCGA-XF-A9SJ-01	8.7	0
TCGA-XF-A9SK	BLCA	Wild	65	MALE	WHITE	Stage IV	Dead	1	486	1	486	#N/A	#N/A	1	382	TCGA-XF-A9SK-01	4.56667	0
TCGA-XF-A9SL	BLCA	Wild	69	MALE	WHITE	Stage IV	Dead	1	2020	0	2020	#N/A	#N/A	0	2020	TCGA-XF-A9SL-01	2.96667	0
TCGA-XF-A9SM	BLCA	Wild	76	MALE	WHITE	Stage III	Alive	0	1048	0	1048	0	1048	0	1048	TCGA-XF-A9SM-01	7.3	0
TCGA-XF-A9SP	BLCA	Wild	59	MALE	WHITE	Stage III	Dead	1	454	1	454	#N/A	#N/A	1	310	TCGA-XF-A9SP-01	9.5	0.05
TCGA-XF-A9ST	BLCA	Wild	68	MALE	WHITE	Stage III	Dead	1	128	#N/A	128	#N/A	#N/A	0	128	TCGA-XF-A9ST-01	17.4667	0.59
TCGA-XF-A9SU	BLCA	Wild	74	FEMALE	WHITE	Stage IV	Dead	1	182	1	182	#N/A	#N/A	1	103	TCGA-XF-A9SU-01	1.86667	0
TCGA-XF-A9SV	BLCA	Wild	82	MALE	WHITE	Stage IV	Dead	1	388	1	388	#N/A	#N/A	1	237	TCGA-XF-A9SV-01	2.06667	0.13
TCGA-XF-A9SW	BLCA	Wild	85	MALE	WHITE	Stage IV	Dead	1	362	1	362	#N/A	#N/A	1	362	TCGA-XF-A9SW-01	1.53333	0
TCGA-XF-A9SX	BLCA	Wild	63	FEMALE	WHITE	Stage IV	Dead	1	719	1	719	#N/A	#N/A	1	475	TCGA-XF-A9SX-01	3.33333	0.01
TCGA-XF-A9SY	BLCA	Wild	60	FEMALE	WHITE	Stage IV	Alive	0	640	0	640	#N/A	#N/A	1	168	TCGA-XF-A9SY-01	13.4667	0
TCGA-XF-A9SZ	BLCA	Wild	79	MALE	WHITE	Stage IV	Dead	1	859	1	859	#N/A	#N/A	1	854	TCGA-XF-A9SZ-01	6.76667	0.03
TCGA-XF-A9T0	BLCA	Wild	68	MALE	WHITE	Stage III	Alive	0	799	0	799	0	799	0	799	TCGA-XF-A9T0-01	22.7667	0.12
TCGA-XF-A9T2	BLCA	Wild	54	MALE	WHITE	Stage III	Dead	1	575	#N/A	575	#N/A	#N/A	0	575	TCGA-XF-A9T2-01	2.63333	0.08
TCGA-XF-A9T3	BLCA	Wild	69	FEMALE	WHITE	Stage IV	Alive	0	68	0	68	#N/A	#N/A	0	68	TCGA-XF-A9T3-01	11.9667	0
TCGA-XF-A9T4	BLCA	Wild	48	MALE	WHITE	Stage IV	Dead	1	495	1	495	#N/A	#N/A	1	182	TCGA-XF-A9T4-01	1.13333	0
TCGA-XF-A9T5	BLCA	Wild	78	FEMALE	WHITE	Stage IV	Alive	0	2027	0	2027	#N/A	#N/A	1	664	TCGA-XF-A9T5-01	21.0667	0.02
TCGA-XF-A9T6	BLCA	Wild	88	FEMALE	WHITE	Stage III	Alive	0	64	0	64	#N/A	#N/A	0	64	TCGA-XF-A9T6-01	9.66667	0.04
TCGA-XF-A9T8	BLCA	Wild	64	MALE	WHITE	Stage III	Dead	1	418	#N/A	418	#N/A	#N/A	0	418	TCGA-XF-A9T8-01	21.5667	0
TCGA-XF-AAME	BLCA	Wild	64	FEMALE	WHITE	Stage II	Dead	1	2828	1	2828	#N/A	#N/A	1	1651	TCGA-XF-AAME-01	0.733333	0.05
TCGA-XF-AAMF	BLCA	Wild	68	MALE	WHITE	Stage IV	Dead	1	329	1	329	#N/A	#N/A	1	157	TCGA-XF-AAMF-01	2.36667	0.12
TCGA-XF-AAMG	BLCA	Wild	49	MALE	WHITE	Stage III	Alive	0	3364	0	3364	0	3364	0	3364	TCGA-XF-AAMG-01	30.0333	0.26
TCGA-XF-AAMH	BLCA	Wild	80	MALE	WHITE	Stage IV	Dead	1	344	1	344	#N/A	#N/A	1	313	TCGA-XF-AAMH-01	1.9	0.09
TCGA-XF-AAMJ	BLCA	Wild	70	MALE	ASIAN	Stage III	Dead	1	1670	0	1670	0	1670	0	1670	TCGA-XF-AAMJ-01	1.33333	0
TCGA-XF-AAML	BLCA	Wild	75	MALE	WHITE	Stage II	Dead	1	232	0	232	0	232	0	232	TCGA-XF-AAML-01	15	0
TCGA-XF-AAMQ	BLCA	Wild	59	FEMALE	WHITE	Stage II	Alive	0	2177	0	2177	0	2177	0	2177	TCGA-XF-AAMQ-01	5.63333	0.2
TCGA-XF-AAMR	BLCA	Wild	48	MALE	WHITE	Stage III	Alive	0	2790	0	2790	0	2790	0	2790	TCGA-XF-AAMR-01	3.06667	0
TCGA-XF-AAMT	BLCA	Wild	75	FEMALE	WHITE	Stage IV	Dead	1	90	1	90	#N/A	#N/A	1	90	TCGA-XF-AAMT-01	3.33333	0.02
TCGA-XF-AAMW	BLCA	Wild	79	FEMALE	WHITE	Stage IV	Dead	1	253	1	253	#N/A	#N/A	1	253	TCGA-XF-AAMW-01	0.8	0
TCGA-XF-AAMY	BLCA	Wild	78	MALE	WHITE	Stage III	Alive	0	3011	0	3011	1	637	1	637	TCGA-XF-AAMY-01	3.6	0
TCGA-XF-AAMZ	BLCA	Wild	81	FEMALE	WHITE	Stage IV	Dead	1	1348	1	1348	#N/A	#N/A	1	1344	TCGA-XF-AAMZ-01	8.86667	0.04
TCGA-XF-AAN0	BLCA	Wild	68	MALE	WHITE	Stage IV	Dead	1	1718	1	1718	#N/A	#N/A	1	603	TCGA-XF-AAN0-01	13.0667	0.01
TCGA-XF-AAN1	BLCA	Wild	75	FEMALE	[Unknown]	Stage III	Dead	1	941	1	941	#N/A	#N/A	1	650	TCGA-XF-AAN1-01	2.36667	0.06
TCGA-XF-AAN2	BLCA	Wild	73	MALE	WHITE	Stage II	Dead	1	1869	0	1869	0	1869	0	1869	TCGA-XF-AAN2-01	13.8	0.17
TCGA-XF-AAN3	BLCA	Wild	76	MALE	WHITE	Stage IV	Alive	0	2625	0	2625	#N/A	#N/A	0	2625	TCGA-XF-AAN3-01	4.33333	0
TCGA-XF-AAN4	BLCA	Wild	77	FEMALE	WHITE	Stage III	Dead	1	823	0	823	0	823	0	823	TCGA-XF-AAN4-01	1.4	0.01
TCGA-XF-AAN5	BLCA	Wild	61	FEMALE	WHITE	Stage III	Alive	0	2293	0	2293	0	2293	0	2293	TCGA-XF-AAN5-01	9.8	0
TCGA-XF-AAN7	BLCA	Wild	60	MALE	WHITE	Stage IV	Dead	1	565	1	565	#N/A	#N/A	1	321	TCGA-XF-AAN7-01	4.36667	0.19
TCGA-XF-AAN8	BLCA	Wild	74	FEMALE	WHITE	Stage III	Dead	1	118	#N/A	118	#N/A	#N/A	0	118	TCGA-XF-AAN8-01	0.0333333	0
TCGA-YC-A89H	BLCA	Wild	78	FEMALE	WHITE	Stage II	Alive	0	573	0	573	0	573	0	573	TCGA-YC-A89H-01	45.7333	0
TCGA-YC-A8S6	BLCA	Wild	71	MALE	WHITE	Stage II	Alive	0	293	0	293	0	293	0	293	TCGA-YC-A8S6-01	3.26667	0
TCGA-YC-A9TC	BLCA	Wild	71	MALE	WHITE	Stage IV	Dead	1	20	1	20	#N/A	#N/A	1	20	TCGA-YC-A9TC-01	3.73333	0
TCGA-YF-AA3L	BLCA	Wild	47	FEMALE	[Unknown]	Stage II	Alive	0	364	0	364	0	364	0	364	TCGA-YF-AA3L-01	9.4	0.26
TCGA-YF-AA3M	BLCA	Wild	57	MALE	[Unknown]	Stage II	Alive	0	415	0	415	1	381	1	381	TCGA-YF-AA3M-01	4.63333	0.31
TCGA-ZF-A9R0	BLCA	Wild	82	MALE	WHITE	Stage III	Dead	1	680	1	680	#N/A	#N/A	1	559	TCGA-ZF-A9R0-01	5.9	0.09
TCGA-ZF-A9R1	BLCA	Wild	81	MALE	WHITE	Stage IV	Alive	0	773	0	773	#N/A	#N/A	1	758	TCGA-ZF-A9R1-01	2.9	0
TCGA-ZF-A9R2	BLCA	Wild	75	MALE	WHITE	Stage II	Alive	0	642	0	642	0	642	0	642	TCGA-ZF-A9R2-01	4.5	0.23
TCGA-ZF-A9R3	BLCA	Wild	53	FEMALE	WHITE	Stage II	Dead	1	949	1	949	1	917	1	917	TCGA-ZF-A9R3-01	2.66667	0
TCGA-ZF-A9R5	BLCA	Wild	59	MALE	WHITE	Stage III	Alive	0	1090	0	1090	0	1090	0	1090	TCGA-ZF-A9R5-01	3.2	0
TCGA-ZF-A9R9	BLCA	Wild	58	MALE	WHITE	Stage IV	Dead	1	864	1	864	#N/A	#N/A	1	629	TCGA-ZF-A9R9-01	6.1	0.04
TCGA-ZF-A9RC	BLCA	Wild	77	MALE	WHITE	Stage III	Alive	0	2868	0	2868	0	2868	0	2868	TCGA-ZF-A9RC-01	28.2667	0.01
TCGA-ZF-A9RD	BLCA	Wild	75	FEMALE	WHITE	Stage IV	Dead	1	408	#N/A	408	#N/A	#N/A	0	408	TCGA-ZF-A9RD-01	5.26667	0.01
TCGA-ZF-A9RE	BLCA	Wild	78	FEMALE	WHITE	Stage II	Dead	1	106	1	106	#N/A	#N/A	1	106	TCGA-ZF-A9RE-01	2.1	0.04
TCGA-ZF-A9RF	BLCA	Wild	74	MALE	WHITE	Stage II	Alive	0	1949	0	1949	1	1565	1	1565	TCGA-ZF-A9RF-01	7.7	0.01
TCGA-ZF-A9RG	BLCA	Wild	70	FEMALE	WHITE	Stage III	Alive	0	1786	0	1786	1	440	1	440	TCGA-ZF-A9RG-01	7.3	0
TCGA-ZF-A9RL	BLCA	Wild	61	MALE	WHITE	Stage II	Alive	0	2703	0	2703	1	1064	1	1064	TCGA-ZF-A9RL-01	10.4333	0.03
TCGA-ZF-A9RM	BLCA	Wild	70	MALE	WHITE	Stage II	Alive	0	1455	0	1455	0	1455	0	1455	TCGA-ZF-A9RM-01	2.8	0.01
TCGA-ZF-A9RN	BLCA	Wild	67	FEMALE	WHITE	Stage III	Dead	1	615	1	615	#N/A	#N/A	1	516	TCGA-ZF-A9RN-01	5.56667	0.51
TCGA-ZF-AA4N	BLCA	Wild	74	MALE	WHITE	Stage II	Dead	1	88	1	88	#N/A	#N/A	1	88	TCGA-ZF-AA4N-01	5.03333	0.01
TCGA-ZF-AA4R	BLCA	Wild	67	MALE	WHITE	Stage IV	Dead	1	1036	1	1036	#N/A	#N/A	1	750	TCGA-ZF-AA4R-01	2.1	0
TCGA-ZF-AA4T	BLCA	Wild	65	MALE	WHITE	Stage IV	Dead	1	599	1	599	#N/A	#N/A	1	511	TCGA-ZF-AA4T-01	2.96667	0.05
TCGA-ZF-AA4U	BLCA	Wild	70	MALE	WHITE	Stage III	Dead	1	262	1	262	#N/A	#N/A	1	199	TCGA-ZF-AA4U-01	1.8	0.01
TCGA-ZF-AA4V	BLCA	Wild	66	MALE	WHITE	Stage III	Alive	0	1806	0	1806	0	1806	0	1806	TCGA-ZF-AA4V-01	19.4667	0.06
TCGA-ZF-AA4W	BLCA	Wild	56	MALE	WHITE	Stage III	Alive	0	1830	0	1830	1	1679	1	1679	TCGA-ZF-AA4W-01	16.7667	1.31
TCGA-ZF-AA4X	BLCA	Wild	56	MALE	WHITE	Stage II	Alive	0	2044	0	2044	1	1665	1	1665	TCGA-ZF-AA4X-01	19.5	0
TCGA-ZF-AA51	BLCA	Wild	69	FEMALE	WHITE	Stage II	Alive	0	1714	0	1714	0	1714	0	1714	TCGA-ZF-AA51-01	20.8667	0.02
TCGA-ZF-AA52	BLCA	Wild	70	MALE	WHITE	Stage III	Dead	1	1077	#N/A	1077	#N/A	#N/A	0	1077	TCGA-ZF-AA52-01	3.53333	0.03
TCGA-ZF-AA53	BLCA	Wild	60	MALE	WHITE	Stage II	Alive	0	1761	0	1761	0	1761	0	1761	TCGA-ZF-AA53-01	5.53333	0
TCGA-ZF-AA54	BLCA	Wild	71	MALE	WHITE	Stage III	Dead	1	590	#N/A	590	#N/A	#N/A	0	590	TCGA-ZF-AA54-01	5.9	0.01
TCGA-ZF-AA56	BLCA	Wild	79	FEMALE	WHITE	Stage III	Dead	1	259	1	259	#N/A	#N/A	1	248	TCGA-ZF-AA56-01	3.43333	0.01
TCGA-ZF-AA58	BLCA	Wild	61	FEMALE	WHITE	Stage IV	Alive	0	1649	0	1649	#N/A	#N/A	0	1649	TCGA-ZF-AA58-01	6.86667	0
TCGA-ZF-AA5H	BLCA	Wild	60	FEMALE	WHITE	Stage IV	Alive	0	897	0	897	#N/A	#N/A	1	177	TCGA-ZF-AA5H-01	1.86667	0.07
TCGA-ZF-AA5N	BLCA	Wild	62	FEMALE	WHITE	Stage IV	Dead	1	168	1	168	#N/A	#N/A	1	168	TCGA-ZF-AA5N-01	1.7	0
TCGA-ZF-AA5P	BLCA	Wild	65	MALE	WHITE	Stage IV	Alive	0	372	0	372	#N/A	#N/A	0	372	TCGA-ZF-AA5P-01	1.7	0.05
TCGA-A8-A09N	BRCA	Mut	57	FEMALE	[Not Available]	Stage IIIC	Alive	0	31	0	31	0	31	0	31	TCGA-A8-A09N-01	1.96667	0.97
TCGA-AC-A5EH	BRCA	Mut	76	FEMALE	BLACK OR AFRICAN AMERICAN	Stage IIB	Alive	0	511	0	511	0	511	0	511	TCGA-AC-A5EH-01	4.3	0.08
TCGA-BH-A0DZ	BRCA	Mut	43	FEMALE	WHITE	Stage IIB	Alive	0	495	0	495	0	495	0	495	TCGA-BH-A0DZ-01	14.6667	0.32
TCGA-D8-A1XQ	BRCA	Mut	69	FEMALE	WHITE	Stage IIA	Alive	0	499	0	499	0	499	0	499	TCGA-D8-A1XQ-01	26.6333	16.36
TCGA-E2-A14R	BRCA	Mut	62	FEMALE	WHITE	Stage IIA	Alive	0	1174	0	1174	0	1174	1	971	TCGA-E2-A14R-01	3.7	1.89
TCGA-E2-A1B1	BRCA	Mut	45	FEMALE	WHITE	Stage IIB	Alive	0	2653	0	2653	0	2653	0	2653	TCGA-E2-A1B1-01	1.76667	0.01
TCGA-EW-A2FV	BRCA	Mut	39	FEMALE	WHITE	Stage IIIC	Alive	0	788	0	788	0	788	0	788	TCGA-EW-A2FV-01	130.3	1.49
TCGA-GM-A2DM	BRCA	Mut	57	FEMALE	WHITE	Stage IIA	Alive	0	3226	0	3226	0	3226	0	3226	TCGA-GM-A2DM-01	0.8	0.05
TCGA-3C-AAAU	BRCA	Wild	55	FEMALE	WHITE	Stage X	Alive	0	4047	0	4047	1	1808	1	1808	TCGA-3C-AAAU-01	0.8	0.55
TCGA-3C-AALI	BRCA	Wild	50	FEMALE	BLACK OR AFRICAN AMERICAN	Stage IIB	Alive	0	4005	0	4005	0	4005	0	4005	TCGA-3C-AALI-01	15.2667	0.74
TCGA-3C-AALJ	BRCA	Wild	62	FEMALE	BLACK OR AFRICAN AMERICAN	Stage IIB	Alive	0	1474	0	1474	0	1474	0	1474	TCGA-3C-AALJ-01	0.933333	0.31
TCGA-3C-AALK	BRCA	Wild	52	FEMALE	BLACK OR AFRICAN AMERICAN	Stage IA	Alive	0	1448	0	1448	#N/A	#N/A	0	1448	TCGA-3C-AALK-01	1.5	0.03
TCGA-4H-AAAK	BRCA	Wild	50	FEMALE	WHITE	Stage IIIA	Alive	0	348	0	348	0	348	0	348	TCGA-4H-AAAK-01	0.7	0.01
TCGA-5L-AAT0	BRCA	Wild	42	FEMALE	WHITE	Stage IIA	Alive	0	1477	0	1477	#N/A	#N/A	0	1477	TCGA-5L-AAT0-01	4.6	0
TCGA-5T-A9QA	BRCA	Wild	52	FEMALE	BLACK OR AFRICAN AMERICAN	Stage IIA	Alive	0	303	0	303	#N/A	#N/A	0	303	TCGA-5T-A9QA-01	1.9	0.46
TCGA-A1-A0SB	BRCA	Wild	70	FEMALE	WHITE	Stage I	Alive	0	259	0	259	0	259	0	259	TCGA-A1-A0SB-01	0.5	0.2
TCGA-A1-A0SD	BRCA	Wild	59	FEMALE	WHITE	Stage IIA	Alive	0	437	0	437	0	437	0	437	TCGA-A1-A0SD-01	1.1	0.02
TCGA-A1-A0SE	BRCA	Wild	56	FEMALE	WHITE	Stage I	Alive	0	1321	0	1321	0	1321	0	1321	TCGA-A1-A0SE-01	0.933333	0.01
TCGA-A1-A0SF	BRCA	Wild	54	FEMALE	WHITE	Stage IIA	Alive	0	1463	0	1463	0	1463	0	1463	TCGA-A1-A0SF-01	1.66667	0.36
TCGA-A1-A0SG	BRCA	Wild	61	FEMALE	WHITE	Stage IIB	Alive	0	434	0	434	0	434	0	434	TCGA-A1-A0SG-01	0.9	0
TCGA-A1-A0SH	BRCA	Wild	39	FEMALE	WHITE	Stage IIA	Alive	0	1437	0	1437	0	1437	0	1437	TCGA-A1-A0SH-01	3.13333	0.02
TCGA-A1-A0SI	BRCA	Wild	52	FEMALE	WHITE	Stage IIB	Alive	0	635	0	635	0	635	0	635	TCGA-A1-A0SI-01	6.03333	0.63
TCGA-A1-A0SJ	BRCA	Wild	39	FEMALE	BLACK OR AFRICAN AMERICAN	Stage IIIA	Alive	0	416	0	416	0	416	0	416	TCGA-A1-A0SJ-01	1.03333	0.37
TCGA-A1-A0SK	BRCA	Wild	54	FEMALE	ASIAN	Stage IIA	Dead	1	967	1	967	#N/A	#N/A	1	967	TCGA-A1-A0SK-01	2.03333	1.02
TCGA-A1-A0SM	BRCA	Wild	77	MALE	WHITE	Stage IIA	Alive	0	242	0	242	0	242	0	242	TCGA-A1-A0SM-01	0.633333	0.12
TCGA-A1-A0SN	BRCA	Wild	50	FEMALE	WHITE	Stage IIA	Alive	0	1196	0	1196	0	1196	0	1196	TCGA-A1-A0SN-01	1.7	0.57
TCGA-A1-A0SO	BRCA	Wild	67	FEMALE	WHITE	Stage IIB	Alive	0	852	0	852	0	852	0	852	TCGA-A1-A0SO-01	9.06667	2.84
TCGA-A1-A0SP	BRCA	Wild	40	FEMALE	[Not Available]	Stage IIA	Alive	0	584	0	584	0	584	0	584	TCGA-A1-A0SP-01	1.7	0.26
TCGA-A1-A0SQ	BRCA	Wild	45	FEMALE	WHITE	Stage IIB	Alive	0	554	0	554	0	554	0	554	TCGA-A1-A0SQ-01	0.766667	0.18
TCGA-A2-A04N	BRCA	Wild	66	FEMALE	WHITE	Stage IA	Alive	0	4354	0	4354	0	4354	0	4354	TCGA-A2-A04N-01	1.36667	0
TCGA-A2-A04P	BRCA	Wild	36	FEMALE	BLACK OR AFRICAN AMERICAN	Stage IIIC	Dead	1	548	1	548	#N/A	#N/A	1	102	TCGA-A2-A04P-01	4.26667	1.12
TCGA-A2-A04Q	BRCA	Wild	48	FEMALE	WHITE	Stage IA	Alive	0	2385	0	2385	0	2385	0	2385	TCGA-A2-A04Q-01	1.56667	0.03
TCGA-A2-A04R	BRCA	Wild	36	FEMALE	BLACK OR AFRICAN AMERICAN	Stage IA	Alive	0	3709	0	3709	0	3709	0	3709	TCGA-A2-A04R-01	2.53333	0.77
TCGA-A2-A04T	BRCA	Wild	62	FEMALE	WHITE	Stage IIA	Alive	0	2246	0	2246	0	2246	0	2246	TCGA-A2-A04T-01	2.93333	1.39
TCGA-A2-A04U	BRCA	Wild	47	FEMALE	WHITE	Stage IIA	Alive	0	2654	0	2654	0	2654	0	2654	TCGA-A2-A04U-01	1.63333	1.39
TCGA-A2-A04V	BRCA	Wild	39	FEMALE	WHITE	Stage IIA	Dead	1	1920	1	1920	1	1470	1	1470	TCGA-A2-A04V-01	0.9	0.04
TCGA-A2-A04W	BRCA	Wild	50	FEMALE	WHITE	Stage IIB	Alive	0	3102	0	3102	0	3102	0	3102	TCGA-A2-A04W-01	4.26667	0.04
TCGA-A2-A04X	BRCA	Wild	34	FEMALE	WHITE	Stage IIA	Alive	0	1686	0	1686	0	1686	0	1686	TCGA-A2-A04X-01	0.933333	0.05
TCGA-A2-A04Y	BRCA	Wild	53	FEMALE	WHITE	Stage IIB	Alive	0	1099	0	1099	0	1099	0	1099	TCGA-A2-A04Y-01	1.6	0.1
TCGA-A2-A0CK	BRCA	Wild	60	FEMALE	WHITE	Stage IIIA	Alive	0	4159	0	4159	1	1364	1	1364	TCGA-A2-A0CK-01	0.433333	0
TCGA-A2-A0CL	BRCA	Wild	37	FEMALE	BLACK OR AFRICAN AMERICAN	Stage IIIA	Alive	0	3015	0	3015	#N/A	#N/A	0	3015	TCGA-A2-A0CL-01	4.43333	0.13
TCGA-A2-A0CM	BRCA	Wild	40	FEMALE	BLACK OR AFRICAN AMERICAN	Stage IIA	Dead	1	754	1	754	1	382	1	382	TCGA-A2-A0CM-01	1.73333	0.39
TCGA-A2-A0CO	BRCA	Wild	85	FEMALE	WHITE	Stage IIB	Dead	1	3492	0	3492	#N/A	#N/A	0	3492	TCGA-A2-A0CO-01	0	0.01
TCGA-A2-A0CP	BRCA	Wild	60	FEMALE	WHITE	Stage IA	Alive	0	2813	0	2813	0	2813	0	2813	TCGA-A2-A0CP-01	1.23333	0.04
TCGA-A2-A0CQ	BRCA	Wild	62	FEMALE	BLACK OR AFRICAN AMERICAN	Stage IA	Alive	0	2695	0	2695	0	2695	0	2695	TCGA-A2-A0CQ-01	1	0.07
TCGA-A2-A0CR	BRCA	Wild	54	FEMALE	ASIAN	Stage IIB	Alive	0	3283	0	3283	#N/A	#N/A	0	3283	TCGA-A2-A0CR-01	4.5	0
TCGA-A2-A0CS	BRCA	Wild	73	FEMALE	WHITE	Stage IV	Dead	1	2348	0	2348	#N/A	#N/A	0	2348	TCGA-A2-A0CS-01	1.03333	0.27
TCGA-A2-A0CT	BRCA	Wild	71	FEMALE	WHITE	Stage IIA	Alive	0	2289	0	2289	0	2289	0	2289	TCGA-A2-A0CT-01	2.66667	1.11
TCGA-A2-A0CU	BRCA	Wild	73	FEMALE	WHITE	Stage IIA	Dead	1	158	0	158	#N/A	#N/A	0	158	TCGA-A2-A0CU-01	1.43333	0.06
TCGA-A2-A0CV	BRCA	Wild	41	FEMALE	ASIAN	Stage IIB	Alive	0	3011	0	3011	0	3011	0	3011	TCGA-A2-A0CV-01	0.733333	0
TCGA-A2-A0CW	BRCA	Wild	67	FEMALE	WHITE	Stage IIB	Alive	0	3283	0	3283	0	3283	0	3283	TCGA-A2-A0CW-01	2.16667	0.32
TCGA-A2-A0CX	BRCA	Wild	52	FEMALE	WHITE	Stage IIA	Alive	0	1728	0	1728	0	1728	0	1728	TCGA-A2-A0CX-01	8.33333	0.41
TCGA-A2-A0CZ	BRCA	Wild	46	FEMALE	WHITE	Stage IIA	Alive	0	1616	0	1616	#N/A	#N/A	0	1616	TCGA-A2-A0CZ-01	0.8	0.01
TCGA-A2-A0D0	BRCA	Wild	60	FEMALE	BLACK OR AFRICAN AMERICAN	Stage IIA	Alive	0	2048	0	2048	0	2048	0	2048	TCGA-A2-A0D0-01	2.46667	1.96
TCGA-A2-A0D1	BRCA	Wild	76	FEMALE	WHITE	Stage IIA	Alive	0	1051	0	1051	0	1051	0	1051	TCGA-A2-A0D1-01	1.46667	0.63
TCGA-A2-A0D2	BRCA	Wild	45	FEMALE	WHITE	Stage IIA	Alive	0	1027	0	1027	0	1027	0	1027	TCGA-A2-A0D2-01	2.7	0.35
TCGA-A2-A0D3	BRCA	Wild	42	FEMALE	WHITE	Stage IA	Alive	0	1873	0	1873	0	1873	0	1873	TCGA-A2-A0D3-01	0.833333	0.01
TCGA-A2-A0D4	BRCA	Wild	37	FEMALE	BLACK OR AFRICAN AMERICAN	Stage IIB	Alive	0	767	0	767	0	767	0	767	TCGA-A2-A0D4-01	1.2	0.86
TCGA-A2-A0EM	BRCA	Wild	73	FEMALE	WHITE	Stage IA	Alive	0	3094	0	3094	0	3094	0	3094	TCGA-A2-A0EM-01	1.03333	0.06
TCGA-A2-A0EN	BRCA	Wild	70	FEMALE	WHITE	Stage IIA	Alive	0	4088	0	4088	0	4088	0	4088	TCGA-A2-A0EN-01	1.1	0
TCGA-A2-A0EO	BRCA	Wild	54	FEMALE	WHITE	Stage IA	Alive	0	2442	0	2442	#N/A	#N/A	0	2442	TCGA-A2-A0EO-01	0.933333	0.08
TCGA-A2-A0EP	BRCA	Wild	56	FEMALE	WHITE	Stage I	Alive	0	3603	0	3603	0	3603	0	3603	TCGA-A2-A0EP-01	0.3	0
TCGA-A2-A0EQ	BRCA	Wild	64	FEMALE	BLACK OR AFRICAN AMERICAN	Stage IIA	Alive	0	2426	0	2426	0	2426	0	2426	TCGA-A2-A0EQ-01	7.1	0.11
TCGA-A2-A0ER	BRCA	Wild	63	FEMALE	WHITE	Stage IB	Alive	0	2263	0	2263	0	2263	0	2263	TCGA-A2-A0ER-01	0.9	0.06
TCGA-A2-A0ES	BRCA	Wild	52	FEMALE	WHITE	Stage IIA	Alive	0	2190	0	2190	0	2190	0	2190	TCGA-A2-A0ES-01	0.433333	0.04
TCGA-A2-A0ET	BRCA	Wild	58	FEMALE	WHITE	Stage IIIA	Alive	0	1066	0	1066	0	1066	0	1066	TCGA-A2-A0ET-01	1.43333	0.64
TCGA-A2-A0EU	BRCA	Wild	79	FEMALE	WHITE	Stage IA	Alive	0	1043	0	1043	0	1043	0	1043	TCGA-A2-A0EU-01	1.46667	0.1
TCGA-A2-A0EV	BRCA	Wild	80	FEMALE	WHITE	Stage IA	Alive	0	968	0	968	0	968	0	968	TCGA-A2-A0EV-01	2.1	0.2
TCGA-A2-A0EW	BRCA	Wild	53	FEMALE	WHITE	Stage IIIC	Dead	1	1884	1	1884	#N/A	#N/A	1	1353	TCGA-A2-A0EW-01	0.5	0
TCGA-A2-A0EX	BRCA	Wild	46	FEMALE	WHITE	Stage IIB	Alive	0	752	0	752	0	752	0	752	TCGA-A2-A0EX-01	0.9	0.01
TCGA-A2-A0EY	BRCA	Wild	62	FEMALE	WHITE	Stage IIB	Alive	0	1925	0	1925	0	1925	0	1925	TCGA-A2-A0EY-01	6.13333	0.24
TCGA-A2-A0ST	BRCA	Wild	62	FEMALE	WHITE	Stage IIA	Alive	0	3017	0	3017	0	3017	0	3017	TCGA-A2-A0ST-01	0.5	0.01
TCGA-A2-A0SU	BRCA	Wild	66	FEMALE	WHITE	Stage IIA	Alive	0	1662	0	1662	0	1662	0	1662	TCGA-A2-A0SU-01	1.06667	0.04
TCGA-A2-A0SV	BRCA	Wild	63	FEMALE	WHITE	Stage IV	Dead	1	825	1	825	#N/A	#N/A	1	825	TCGA-A2-A0SV-01	1.1	0.59
TCGA-A2-A0SW	BRCA	Wild	82	FEMALE	WHITE	Stage IV	Dead	1	1365	1	1365	#N/A	#N/A	1	653	TCGA-A2-A0SW-01	1.73333	1.59
TCGA-A2-A0SX	BRCA	Wild	48	FEMALE	WHITE	Stage IA	Alive	0	1534	0	1534	1	1239	1	1239	TCGA-A2-A0SX-01	0.766667	0.31
TCGA-A2-A0SY	BRCA	Wild	62	FEMALE	WHITE	Stage IIIA	Alive	0	1347	0	1347	0	1347	0	1347	TCGA-A2-A0SY-01	3.86667	0
TCGA-A2-A0T0	BRCA	Wild	59	FEMALE	WHITE	Stage IIB	Alive	0	533	0	533	0	533	0	533	TCGA-A2-A0T0-01	5.56667	0.28
TCGA-A2-A0T1	BRCA	Wild	55	FEMALE	AMERICAN INDIAN OR ALASKA NATIVE	Stage IIIC	Alive	0	521	0	521	0	521	0	521	TCGA-A2-A0T1-01	0.8	0.02
TCGA-A2-A0T2	BRCA	Wild	66	FEMALE	WHITE	Stage IV	Dead	1	255	1	255	#N/A	#N/A	1	255	TCGA-A2-A0T2-01	0.933333	1.48
TCGA-A2-A0T3	BRCA	Wild	37	FEMALE	WHITE	Stage IB	Alive	0	1516	0	1516	0	1516	0	1516	TCGA-A2-A0T3-01	1	0.51
TCGA-A2-A0T4	BRCA	Wild	62	FEMALE	WHITE	Stage IIA	Alive	0	624	0	624	0	624	0	624	TCGA-A2-A0T4-01	1.03333	0.01
TCGA-A2-A0T5	BRCA	Wild	39	FEMALE	WHITE	Stage IIA	Alive	0	531	0	531	0	531	0	531	TCGA-A2-A0T5-01	0.5	0.06
TCGA-A2-A0T6	BRCA	Wild	50	FEMALE	WHITE	Stage IIB	Alive	0	575	0	575	0	575	0	575	TCGA-A2-A0T6-01	0.566667	0.04
TCGA-A2-A0T7	BRCA	Wild	51	FEMALE	WHITE	Stage IIA	Alive	0	631	0	631	0	631	0	631	TCGA-A2-A0T7-01	0.766667	0.02
TCGA-A2-A0YC	BRCA	Wild	59	FEMALE	WHITE	Stage IIB	Alive	0	990	0	990	#N/A	#N/A	1	756	TCGA-A2-A0YC-01	0.766667	0.02
TCGA-A2-A0YD	BRCA	Wild	63	FEMALE	WHITE	Stage IIB	Alive	0	769	0	769	0	769	0	769	TCGA-A2-A0YD-01	1.86667	0.14
TCGA-A2-A0YE	BRCA	Wild	48	FEMALE	WHITE	Stage IIB	Alive	0	554	0	554	0	554	0	554	TCGA-A2-A0YE-01	0.933333	1.48
TCGA-A2-A0YF	BRCA	Wild	67	FEMALE	BLACK OR AFRICAN AMERICAN	Stage I	Alive	0	1535	0	1535	0	1535	0	1535	TCGA-A2-A0YF-01	0.866667	0.17
TCGA-A2-A0YG	BRCA	Wild	63	FEMALE	WHITE	Stage IIIC	Alive	0	666	0	666	0	666	0	666	TCGA-A2-A0YG-01	1.73333	0.29
TCGA-A2-A0YH	BRCA	Wild	53	FEMALE	WHITE	Stage IIIA	Alive	0	659	0	659	0	659	0	659	TCGA-A2-A0YH-01	2.26667	0.26
TCGA-A2-A0YI	BRCA	Wild	62	FEMALE	WHITE	Stage I	Alive	0	1505	0	1505	0	1505	0	1505	TCGA-A2-A0YI-01	0.4	0
TCGA-A2-A0YJ	BRCA	Wild	39	FEMALE	WHITE	Stage IIIA	Alive	0	566	0	566	1	559	1	559	TCGA-A2-A0YJ-01	2.5	0.47
TCGA-A2-A0YK	BRCA	Wild	61	FEMALE	WHITE	Stage IIA	Alive	0	588	0	588	#N/A	#N/A	0	588	TCGA-A2-A0YK-01	10.6	0
TCGA-A2-A0YL	BRCA	Wild	48	FEMALE	WHITE	Stage IIIA	Alive	0	1474	0	1474	0	1474	0	1474	TCGA-A2-A0YL-01	0.933333	0
TCGA-A2-A0YM	BRCA	Wild	67	FEMALE	WHITE	Stage IIA	Alive	0	965	0	965	0	965	0	965	TCGA-A2-A0YM-01	2.56667	1.2
TCGA-A2-A0YT	BRCA	Wild	56	FEMALE	WHITE	Stage IIIB	Dead	1	723	0	723	0	723	0	723	TCGA-A2-A0YT-01	1.93333	0.84
TCGA-A2-A1FV	BRCA	Wild	74	FEMALE	WHITE	Stage IIB	Alive	0	714	0	714	0	714	0	714	TCGA-A2-A1FV-01	1.3	0.21
TCGA-A2-A1FW	BRCA	Wild	62	FEMALE	WHITE	Stage IIIA	Alive	0	528	0	528	0	528	0	528	TCGA-A2-A1FW-01	2.03333	0.89
TCGA-A2-A1FX	BRCA	Wild	61	FEMALE	WHITE	Stage IIIA	Alive	0	1847	0	1847	0	1847	0	1847	TCGA-A2-A1FX-01	0.8	0.3
TCGA-A2-A1FZ	BRCA	Wild	63	FEMALE	WHITE	Stage IIA	Alive	0	683	0	683	0	683	0	683	TCGA-A2-A1FZ-01	0.866667	0.06
TCGA-A2-A1G0	BRCA	Wild	49	FEMALE	WHITE	Stage IIB	Alive	0	616	0	616	0	616	0	616	TCGA-A2-A1G0-01	0.666667	0.2
TCGA-A2-A1G1	BRCA	Wild	85	FEMALE	WHITE	Stage IIB	Alive	0	584	0	584	0	584	0	584	TCGA-A2-A1G1-01	0.966667	1.11
TCGA-A2-A1G4	BRCA	Wild	71	FEMALE	WHITE	Stage IIIA	Alive	0	595	0	595	0	595	0	595	TCGA-A2-A1G4-01	0.933333	0.24
TCGA-A2-A1G6	BRCA	Wild	50	FEMALE	WHITE	Stage IIIA	Alive	0	501	0	501	0	501	0	501	TCGA-A2-A1G6-01	0.266667	0.07
TCGA-A2-A259	BRCA	Wild	70	FEMALE	BLACK OR AFRICAN AMERICAN	Stage I	Alive	0	1596	0	1596	#N/A	#N/A	0	1596	TCGA-A2-A259-01	0.733333	0.1
TCGA-A2-A25A	BRCA	Wild	44	FEMALE	WHITE	Stage IIA	Alive	0	3276	0	3276	0	3276	0	3276	TCGA-A2-A25A-01	10.1	0.08
TCGA-A2-A25B	BRCA	Wild	39	FEMALE	BLACK OR AFRICAN AMERICAN	Stage IIB	Alive	0	1291	0	1291	#N/A	#N/A	1	1290	TCGA-A2-A25B-01	3.26667	0.61
TCGA-A2-A25C	BRCA	Wild	50	FEMALE	WHITE	Stage IIB	Alive	0	523	0	523	0	523	0	523	TCGA-A2-A25C-01	1.13333	0.98
TCGA-A2-A25D	BRCA	Wild	90	FEMALE	WHITE	Stage IIIC	Alive	0	552	0	552	#N/A	#N/A	0	552	TCGA-A2-A25D-01	1.7	0
TCGA-A2-A25E	BRCA	Wild	34	FEMALE	BLACK OR AFRICAN AMERICAN	Stage IIIA	Alive	0	3204	0	3204	1	2989	1	2989	TCGA-A2-A25E-01	1.7	1.75
TCGA-A2-A25F	BRCA	Wild	66	FEMALE	WHITE	Stage IIA	Alive	0	322	0	322	0	322	0	322	TCGA-A2-A25F-01	0.166667	0.55
TCGA-A2-A3KC	BRCA	Wild	55	FEMALE	BLACK OR AFRICAN AMERICAN	Stage IIB	Alive	0	1102	0	1102	0	1102	0	1102	TCGA-A2-A3KC-01	0	0.01
TCGA-A2-A3KD	BRCA	Wild	47	FEMALE	WHITE	Stage IIIA	Alive	0	1206	0	1206	#N/A	#N/A	0	1206	TCGA-A2-A3KD-01	0.233333	0
TCGA-A2-A3XS	BRCA	Wild	62	FEMALE	BLACK OR AFRICAN AMERICAN	Stage IIIA	Dead	1	1032	1	1032	1	682	1	682	TCGA-A2-A3XS-01	0	0.38
TCGA-A2-A3XT	BRCA	Wild	45	FEMALE	BLACK OR AFRICAN AMERICAN	Stage IIB	Alive	0	2770	0	2770	0	2770	0	2770	TCGA-A2-A3XT-01	2.26667	0.16
TCGA-A2-A3XU	BRCA	Wild	35	FEMALE	BLACK OR AFRICAN AMERICAN	Stage IIB	Dead	1	912	1	912	1	574	1	574	TCGA-A2-A3XU-01	0.7	0.6
TCGA-A2-A3XV	BRCA	Wild	46	FEMALE	BLACK OR AFRICAN AMERICAN	Stage IIA	Alive	0	996	0	996	0	996	0	996	TCGA-A2-A3XV-01	1.3	0.01
TCGA-A2-A3XW	BRCA	Wild	42	FEMALE	BLACK OR AFRICAN AMERICAN	Stage IIB	Alive	0	1712	0	1712	0	1712	0	1712	TCGA-A2-A3XW-01	0.266667	0
TCGA-A2-A3XX	BRCA	Wild	49	FEMALE	BLACK OR AFRICAN AMERICAN	Stage IIA	Dead	1	1439	0	1439	0	1439	0	1439	TCGA-A2-A3XX-01	1.1	0.21
TCGA-A2-A3XY	BRCA	Wild	49	FEMALE	BLACK OR AFRICAN AMERICAN	Stage IIB	Dead	1	1093	1	1093	1	802	1	802	TCGA-A2-A3XY-01	0	0.02
TCGA-A2-A3XZ	BRCA	Wild	46	FEMALE	BLACK OR AFRICAN AMERICAN	Stage I	Alive	0	1532	0	1532	0	1532	0	1532	TCGA-A2-A3XZ-01	1.06667	0.03
TCGA-A2-A3Y0	BRCA	Wild	57	FEMALE	BLACK OR AFRICAN AMERICAN	Stage IIB	Alive	0	1546	0	1546	#N/A	#N/A	0	1546	TCGA-A2-A3Y0-01	4.96667	0.07
TCGA-A2-A4RW	BRCA	Wild	49	FEMALE	WHITE	Stage IIIC	Alive	0	222	0	222	0	222	0	222	TCGA-A2-A4RW-01	0	0
TCGA-A2-A4RX	BRCA	Wild	67	FEMALE	BLACK OR AFRICAN AMERICAN	Stage IIA	Alive	0	742	0	742	0	742	0	742	TCGA-A2-A4RX-01	NA	0.03
TCGA-A2-A4RY	BRCA	Wild	46	FEMALE	WHITE	Stage IIIC	Alive	0	648	0	648	0	648	0	648	TCGA-A2-A4RY-01	0	0.01
TCGA-A2-A4S0	BRCA	Wild	77	FEMALE	WHITE	Stage IIA	Alive	0	706	0	706	0	706	0	706	TCGA-A2-A4S0-01	NA	0
TCGA-A2-A4S1	BRCA	Wild	66	FEMALE	WHITE	Stage IIA	Alive	0	820	0	820	0	820	0	820	TCGA-A2-A4S1-01	2.36667	0.04
TCGA-A2-A4S2	BRCA	Wild	62	FEMALE	WHITE	Stage IIIA	Alive	0	643	0	643	0	643	0	643	TCGA-A2-A4S2-01	0.9	0
TCGA-A2-A4S3	BRCA	Wild	59	FEMALE	BLACK OR AFRICAN AMERICAN	Stage IIB	Alive	0	666	0	666	0	666	0	666	TCGA-A2-A4S3-01	1.8	0.13
TCGA-A7-A0CD	BRCA	Wild	66	FEMALE	WHITE	Stage I	Alive	0	1165	0	1165	0	1165	0	1165	TCGA-A7-A0CD-01	0.733333	0.63
TCGA-A7-A0CE	BRCA	Wild	57	FEMALE	WHITE	Stage IIA	Alive	0	1074	0	1074	0	1074	0	1074	TCGA-A7-A0CE-01	6	1.68
TCGA-A7-A0CG	BRCA	Wild	78	FEMALE	WHITE	Stage IIA	Alive	0	1043	0	1043	#N/A	#N/A	0	1043	TCGA-A7-A0CG-01	1.56667	0.16
TCGA-A7-A0CH	BRCA	Wild	79	FEMALE	WHITE	Stage IIA	Alive	0	1079	0	1079	0	1079	0	1079	TCGA-A7-A0CH-01	1.83333	0.32
TCGA-A7-A0CJ	BRCA	Wild	57	FEMALE	WHITE	Stage IIA	Alive	0	931	0	931	#N/A	#N/A	0	931	TCGA-A7-A0CJ-01	1.76667	1.26
TCGA-A7-A0D9	BRCA	Wild	37	FEMALE	WHITE	Stage IIA	Alive	0	1139	0	1139	0	1139	0	1139	TCGA-A7-A0D9-01	1.33333	0.34
TCGA-A7-A0DA	BRCA	Wild	62	FEMALE	WHITE	Stage IIA	Alive	0	1085	0	1085	0	1085	0	1085	TCGA-A7-A0DA-01	5.03333	1.1
TCGA-A7-A0DB	BRCA	Wild	56	FEMALE	WHITE	Stage IIA	Alive	0	1007	0	1007	#N/A	#N/A	0	1007	TCGA-A7-A0DB-01	1.03333	0.64
TCGA-A7-A0DC	BRCA	Wild	63	FEMALE	WHITE	Stage IA	Alive	0	906	0	906	0	906	0	906	TCGA-A7-A0DC-01	0	NA
TCGA-A7-A13D	BRCA	Wild	46	FEMALE	BLACK OR AFRICAN AMERICAN	Stage IIA	Alive	0	965	0	965	0	965	0	965	TCGA-A7-A13D-01	2.93333	2.07
TCGA-A7-A13E	BRCA	Wild	62	FEMALE	WHITE	Stage IIB	Dead	1	614	1	614	1	556	1	556	TCGA-A7-A13E-01	3.1	4.87
TCGA-A7-A13F	BRCA	Wild	44	FEMALE	WHITE	Stage IIIA	Alive	0	765	0	765	0	765	0	765	TCGA-A7-A13F-01	2.43333	0.27
TCGA-A7-A13G	BRCA	Wild	79	FEMALE	WHITE	Stage IIA	Alive	0	718	0	718	0	718	1	586	TCGA-A7-A13G-01	0.666667	0.18
TCGA-A7-A13H	BRCA	Wild	61	FEMALE	WHITE	Stage IIB	Alive	0	899	0	899	0	899	1	795	TCGA-A7-A13H-01	NA	0
TCGA-A7-A26E	BRCA	Wild	71	FEMALE	WHITE	Stage IIIA	Alive	0	954	0	954	0	954	0	954	TCGA-A7-A26E-01	1.3	3.15
TCGA-A7-A26F	BRCA	Wild	55	FEMALE	WHITE	Stage IA	Alive	0	738	0	738	0	738	0	738	TCGA-A7-A26F-01	1.23333	1.3
TCGA-A7-A26G	BRCA	Wild	50	FEMALE	BLACK OR AFRICAN AMERICAN	Stage IIA	Alive	0	722	0	722	0	722	0	722	TCGA-A7-A26G-01	1.5	0.77
TCGA-A7-A26H	BRCA	Wild	72	FEMALE	WHITE	Stage IIA	Alive	0	724	0	724	1	291	1	291	TCGA-A7-A26H-01	3.66667	0.18
TCGA-A7-A26I	BRCA	Wild	65	FEMALE	WHITE	Stage IIA	Alive	0	661	0	661	0	661	0	661	TCGA-A7-A26I-01	1.16667	0.68
TCGA-A7-A26J	BRCA	Wild	49	FEMALE	WHITE	Stage IIA	Alive	0	627	0	627	0	627	0	627	TCGA-A7-A26J-01	0.766667	0.35
TCGA-A7-A2KD	BRCA	Wild	53	FEMALE	BLACK OR AFRICAN AMERICAN	Stage IIIA	Alive	0	679	0	679	0	679	0	679	TCGA-A7-A2KD-01	1.03333	0.11
TCGA-A7-A3IY	BRCA	Wild	71	FEMALE	WHITE	Stage I	Alive	0	345	0	345	0	345	0	345	TCGA-A7-A3IY-01	NA	0
TCGA-A7-A3IZ	BRCA	Wild	62	FEMALE	WHITE	Stage IIA	Alive	0	322	0	322	0	322	0	322	TCGA-A7-A3IZ-01	0	0.02
TCGA-A7-A3J0	BRCA	Wild	62	FEMALE	WHITE	Stage IIA	Alive	0	313	0	313	0	313	0	313	TCGA-A7-A3J0-01	0	0
TCGA-A7-A3J1	BRCA	Wild	63	FEMALE	WHITE	Stage IA	Alive	0	343	0	343	0	343	0	343	TCGA-A7-A3J1-01	0	0.01
TCGA-A7-A3RF	BRCA	Wild	79	FEMALE	WHITE	Stage IIA	Alive	0	408	0	408	1	174	1	174	TCGA-A7-A3RF-01	1.06667	0.01
TCGA-A7-A425	BRCA	Wild	70	FEMALE	WHITE	Stage IIIC	Alive	0	447	0	447	1	419	1	419	TCGA-A7-A425-01	0.933333	0
TCGA-A7-A426	BRCA	Wild	50	FEMALE	WHITE	Stage IIIC	Alive	0	364	0	364	0	364	0	364	TCGA-A7-A426-01	0	0
TCGA-A7-A4SA	BRCA	Wild	40	FEMALE	WHITE	Stage IIB	Alive	0	454	0	454	0	454	0	454	TCGA-A7-A4SA-01	0	0.03
TCGA-A7-A4SB	BRCA	Wild	56	FEMALE	WHITE	Stage IIIA	Alive	0	418	0	418	0	418	0	418	TCGA-A7-A4SB-01	0	0.27
TCGA-A7-A4SC	BRCA	Wild	62	FEMALE	WHITE	Stage IIB	Alive	0	446	0	446	0	446	0	446	TCGA-A7-A4SC-01	1.8	0.01
TCGA-A7-A4SD	BRCA	Wild	52	FEMALE	BLACK OR AFRICAN AMERICAN	Stage IIA	Alive	0	441	0	441	0	441	0	441	TCGA-A7-A4SD-01	2.96667	0.21
TCGA-A7-A4SE	BRCA	Wild	54	FEMALE	BLACK OR AFRICAN AMERICAN	Stage IIA	Alive	0	644	0	644	0	644	0	644	TCGA-A7-A4SE-01	6.13333	0.28
TCGA-A7-A4SF	BRCA	Wild	54	FEMALE	BLACK OR AFRICAN AMERICAN	Stage IIA	Alive	0	545	0	545	#N/A	#N/A	0	545	TCGA-A7-A4SF-01	0	0.57
TCGA-A7-A56D	BRCA	Wild	84	FEMALE	BLACK OR AFRICAN AMERICAN	Stage IIA	Alive	0	448	0	448	0	448	0	448	TCGA-A7-A56D-01	8.26667	0.06
TCGA-A7-A5ZV	BRCA	Wild	62	FEMALE	BLACK OR AFRICAN AMERICAN	Stage IIA	Alive	0	368	0	368	0	368	0	368	TCGA-A7-A5ZV-01	5.4	0.91
TCGA-A7-A5ZW	BRCA	Wild	47	FEMALE	BLACK OR AFRICAN AMERICAN	Stage IIA	Alive	0	326	0	326	0	326	0	326	TCGA-A7-A5ZW-01	0.966667	0
TCGA-A7-A5ZX	BRCA	Wild	48	FEMALE	WHITE	Stage IIIC	Alive	0	336	0	336	#N/A	#N/A	0	336	TCGA-A7-A5ZX-01	2.06667	0
TCGA-A7-A6VV	BRCA	Wild	51	FEMALE	BLACK OR AFRICAN AMERICAN	Stage IIA	Alive	0	313	0	313	0	313	0	313	TCGA-A7-A6VV-01	1.43333	0.17
TCGA-A7-A6VW	BRCA	Wild	48	FEMALE	BLACK OR AFRICAN AMERICAN	Stage IIA	Alive	0	285	0	285	#N/A	#N/A	0	285	TCGA-A7-A6VW-01	1.86667	0.47
TCGA-A7-A6VX	BRCA	Wild	68	FEMALE	BLACK OR AFRICAN AMERICAN	Stage IIA	Alive	0	317	0	317	0	317	0	317	TCGA-A7-A6VX-01	3.96667	1.31
TCGA-A7-A6VY	BRCA	Wild	48	FEMALE	BLACK OR AFRICAN AMERICAN	Stage IIB	Alive	0	266	0	266	0	266	0	266	TCGA-A7-A6VY-01	3.16667	0.26
TCGA-A8-A06N	BRCA	Wild	66	FEMALE	[Not Available]	Stage IIIB	Alive	0	0	0	0	0	0	0	0	TCGA-A8-A06N-01	1.13333	0.72
TCGA-A8-A06O	BRCA	Wild	60	FEMALE	[Not Available]	Stage I	Alive	0	396	0	396	0	396	0	396	TCGA-A8-A06O-01	2.3	0.85
TCGA-A8-A06P	BRCA	Wild	63	FEMALE	[Not Available]	Stage IIIA	Alive	0	396	0	396	0	396	0	396	TCGA-A8-A06P-01	1.06667	0.04
TCGA-A8-A06Q	BRCA	Wild	63	FEMALE	[Not Available]	Stage IIIA	Alive	0	31	0	31	0	31	0	31	TCGA-A8-A06Q-01	7.2	0.37
TCGA-A8-A06R	BRCA	Wild	69	FEMALE	[Not Available]	Stage IIB	Alive	0	547	0	547	0	547	0	547	TCGA-A8-A06R-01	1.93333	1.23
TCGA-A8-A06T	BRCA	Wild	75	FEMALE	[Not Available]	Stage IIIA	Alive	0	1614	0	1614	0	1614	0	1614	TCGA-A8-A06T-01	0.866667	0.2
TCGA-A8-A06U	BRCA	Wild	80	FEMALE	[Not Available]	Stage IIB	Dead	1	883	0	883	0	883	0	883	TCGA-A8-A06U-01	2.1	1.75
TCGA-A8-A06X	BRCA	Wild	77	FEMALE	[Not Available]	Stage IIB	Dead	1	943	0	943	0	943	0	943	TCGA-A8-A06X-01	6.16667	0.54
TCGA-A8-A06Y	BRCA	Wild	66	FEMALE	[Not Available]	Stage IIA	Alive	0	791	0	791	1	791	1	791	TCGA-A8-A06Y-01	0.966667	0.87
TCGA-A8-A06Z	BRCA	Wild	84	FEMALE	[Not Available]	Stage IIB	Alive	0	31	0	31	#N/A	#N/A	0	31	TCGA-A8-A06Z-01	2.33333	1.69
TCGA-A8-A075	BRCA	Wild	42	FEMALE	[Not Available]	Stage IIB	Alive	0	518	0	518	0	518	0	518	TCGA-A8-A075-01	2.5	0.47
TCGA-A8-A076	BRCA	Wild	66	FEMALE	[Not Available]	Stage IIA	Alive	0	1642	0	1642	0	1642	0	1642	TCGA-A8-A076-01	2.36667	0.25
TCGA-A8-A079	BRCA	Wild	69	FEMALE	[Not Available]	Stage IIIB	Alive	0	274	0	274	0	274	0	274	TCGA-A8-A079-01	2.13333	0.95
TCGA-A8-A07B	BRCA	Wild	69	FEMALE	[Not Available]	Stage IIA	Alive	0	1308	0	1308	0	1308	0	1308	TCGA-A8-A07B-01	2.13333	0.68
TCGA-A8-A07C	BRCA	Wild	57	FEMALE	[Not Available]	Stage IIA	Alive	0	1034	0	1034	0	1034	0	1034	TCGA-A8-A07C-01	4.56667	1.74
TCGA-A8-A07E	BRCA	Wild	81	FEMALE	[Not Available]	Stage X	Alive	0	608	0	608	0	608	0	608	TCGA-A8-A07E-01	1.9	0.03
TCGA-A8-A07F	BRCA	Wild	65	FEMALE	[Not Available]	Stage IIB	Alive	0	577	0	577	0	577	0	577	TCGA-A8-A07F-01	0.933333	0.11
TCGA-A8-A07G	BRCA	Wild	65	FEMALE	[Not Available]	Stage IIA	Alive	0	577	0	577	0	577	0	577	TCGA-A8-A07G-01	1.96667	0.03
TCGA-A8-A07I	BRCA	Wild	69	FEMALE	[Not Available]	Stage IIIA	Alive	0	426	0	426	0	426	0	426	TCGA-A8-A07I-01	1.33333	0.43
TCGA-A8-A07J	BRCA	Wild	35	FEMALE	[Not Available]	Stage IIB	Alive	0	365	0	365	0	365	0	365	TCGA-A8-A07J-01	1.23333	0.08
TCGA-A8-A07L	BRCA	Wild	58	FEMALE	[Not Available]	Stage IIIA	Alive	0	975	0	975	0	975	0	975	TCGA-A8-A07L-01	2.66667	1.33
TCGA-A8-A07O	BRCA	Wild	51	FEMALE	[Not Available]	Stage IIA	Alive	0	304	0	304	0	304	0	304	TCGA-A8-A07O-01	1.26667	0.07
TCGA-A8-A07P	BRCA	Wild	68	FEMALE	[Not Available]	Stage IIB	Alive	0	334	0	334	0	334	0	334	TCGA-A8-A07P-01	1.53333	0.54
TCGA-A8-A07R	BRCA	Wild	80	FEMALE	[Not Available]	Stage IIIC	Alive	0	273	0	273	#N/A	#N/A	0	273	TCGA-A8-A07R-01	0	3.2
TCGA-A8-A07S	BRCA	Wild	73	FEMALE	[Not Available]	Stage IIA	Alive	0	243	0	243	#N/A	#N/A	0	243	TCGA-A8-A07S-01	NA	NA
TCGA-A8-A07U	BRCA	Wild	66	FEMALE	[Not Available]	Stage IIIA	Alive	0	760	0	760	0	760	0	760	TCGA-A8-A07U-01	2.06667	0.01
TCGA-A8-A07W	BRCA	Wild	76	FEMALE	[Not Available]	Stage IV	Alive	0	304	0	304	#N/A	#N/A	0	304	TCGA-A8-A07W-01	4.3	0.97
TCGA-A8-A07Z	BRCA	Wild	85	FEMALE	[Not Available]	Stage IIA	Alive	0	1371	0	1371	0	1371	0	1371	TCGA-A8-A07Z-01	0.5	2.61
TCGA-A8-A081	BRCA	Wild	80	FEMALE	[Not Available]	Stage IIA	Alive	0	0	0	0	0	0	0	0	TCGA-A8-A081-01	3.66667	0.84
TCGA-A8-A082	BRCA	Wild	58	FEMALE	[Not Available]	Stage IIB	Alive	0	549	0	549	0	549	0	549	TCGA-A8-A082-01	0.666667	0.1
TCGA-A8-A083	BRCA	Wild	67	FEMALE	[Not Available]	Stage IIB	Alive	0	0	0	0	0	0	0	0	TCGA-A8-A083-01	0.966667	0.2
TCGA-A8-A085	BRCA	Wild	44	MALE	[Not Available]	Stage IIB	Alive	0	1124	0	1124	0	1124	0	1124	TCGA-A8-A085-01	2	0.45
TCGA-A8-A086	BRCA	Wild	59	FEMALE	[Not Available]	Stage IIA	Alive	0	396	0	396	0	396	0	396	TCGA-A8-A086-01	0.6	0.31
TCGA-A8-A08A	BRCA	Wild	89	FEMALE	[Not Available]	Stage I	Alive	0	30	0	30	0	30	0	30	TCGA-A8-A08A-01	0.8	0.06
TCGA-A8-A08B	BRCA	Wild	52	FEMALE	[Not Available]	Stage IIA	Alive	0	1156	0	1156	0	1156	0	1156	TCGA-A8-A08B-01	1.56667	0.63
TCGA-A8-A08C	BRCA	Wild	65	FEMALE	[Not Available]	Stage IIA	Alive	0	881	0	881	0	881	0	881	TCGA-A8-A08C-01	NA	0.16
TCGA-A8-A08G	BRCA	Wild	41	FEMALE	[Not Available]	Stage IIA	Alive	0	607	0	607	0	607	0	607	TCGA-A8-A08G-01	1.46667	0.35
TCGA-A8-A08H	BRCA	Wild	66	FEMALE	[Not Available]	Stage IIA	Alive	0	0	0	0	0	0	0	0	TCGA-A8-A08H-01	3.56667	0.02
TCGA-A8-A08I	BRCA	Wild	53	FEMALE	[Not Available]	Stage IIA	Alive	0	365	0	365	0	365	0	365	TCGA-A8-A08I-01	1.13333	1.21
TCGA-A8-A08J	BRCA	Wild	52	FEMALE	[Not Available]	Stage IV	Dead	1	1127	1	1127	#N/A	#N/A	1	1127	TCGA-A8-A08J-01	1.2	0.49
TCGA-A8-A08L	BRCA	Wild	89	FEMALE	[Not Available]	Stage IIIA	Dead	1	304	0	304	0	304	0	304	TCGA-A8-A08L-01	6.53333	1
TCGA-A8-A08O	BRCA	Wild	45	FEMALE	[Not Available]	Stage IV	Alive	0	943	0	943	#N/A	#N/A	1	762	TCGA-A8-A08O-01	0.7	0.08
TCGA-A8-A08P	BRCA	Wild	70	FEMALE	[Not Available]	Stage IIIA	Alive	0	943	0	943	0	943	0	943	TCGA-A8-A08P-01	2.2	0.19
TCGA-A8-A08R	BRCA	Wild	52	FEMALE	[Not Available]	Stage IIB	Alive	0	30	0	30	0	30	0	30	TCGA-A8-A08R-01	7.56667	0.41
TCGA-A8-A08T	BRCA	Wild	64	FEMALE	[Not Available]	Stage IV	Dead	1	3409	1	3409	#N/A	#N/A	1	2557	TCGA-A8-A08T-01	1.3	0.24
TCGA-A8-A08X	BRCA	Wild	43	FEMALE	[Not Available]	Stage IIIC	Alive	0	1308	0	1308	1	366	1	366	TCGA-A8-A08X-01	1.1	0
TCGA-A8-A08Z	BRCA	Wild	76	FEMALE	[Not Available]	[Discrepancy]	Alive	0	1217	0	1217	0	1217	0	1217	TCGA-A8-A08Z-01	0.966667	0.16
TCGA-A8-A090	BRCA	Wild	74	FEMALE	[Not Available]	Stage IIA	Alive	0	0	0	0	0	0	0	0	TCGA-A8-A090-01	1.13333	0.5
TCGA-A8-A091	BRCA	Wild	61	FEMALE	[Not Available]	Stage IIA	Alive	0	1004	0	1004	1	243	1	243	TCGA-A8-A091-01	0.633333	0.28
TCGA-A8-A092	BRCA	Wild	48	FEMALE	[Not Available]	Stage IIIA	Alive	0	942	0	942	0	942	0	942	TCGA-A8-A092-01	2.36667	1.22
TCGA-A8-A093	BRCA	Wild	61	FEMALE	[Not Available]	Stage IIA	Alive	0	546	0	546	0	546	0	546	TCGA-A8-A093-01	3.03333	0.42
TCGA-A8-A094	BRCA	Wild	75	FEMALE	[Not Available]	Stage IIA	Alive	0	0	0	0	0	0	0	0	TCGA-A8-A094-01	5.76667	0.36
TCGA-A8-A095	BRCA	Wild	45	FEMALE	[Not Available]	Stage I	Alive	0	1277	0	1277	0	1277	0	1277	TCGA-A8-A095-01	4.26667	0.2
TCGA-A8-A096	BRCA	Wild	73	FEMALE	[Not Available]	Stage IIA	Alive	0	0	0	0	0	0	0	0	TCGA-A8-A096-01	0.966667	0.1
TCGA-A8-A097	BRCA	Wild	65	FEMALE	[Not Available]	Stage IIB	Alive	0	365	0	365	0	365	0	365	TCGA-A8-A097-01	3.03333	0.29
TCGA-A8-A099	BRCA	Wild	76	FEMALE	[Not Available]	Stage X	Alive	0	304	0	304	#N/A	#N/A	0	304	TCGA-A8-A099-01	0.9	0.62
TCGA-A8-A09A	BRCA	Wild	40	FEMALE	[Not Available]	Stage X	Alive	0	304	0	304	#N/A	#N/A	0	304	TCGA-A8-A09A-01	6.96667	0.03
TCGA-A8-A09B	BRCA	Wild	58	FEMALE	[Not Available]	Stage IIIB	Alive	0	365	0	365	0	365	0	365	TCGA-A8-A09B-01	1.33333	0.27
TCGA-A8-A09C	BRCA	Wild	69	FEMALE	[Not Available]	Stage X	Alive	0	31	0	31	#N/A	#N/A	0	31	TCGA-A8-A09C-01	0.8	1.23
TCGA-A8-A09D	BRCA	Wild	47	FEMALE	[Not Available]	Stage IIB	Alive	0	1522	0	1522	0	1522	0	1522	TCGA-A8-A09D-01	1.3	0.16
TCGA-A8-A09G	BRCA	Wild	79	FEMALE	[Not Available]	Stage IIIC	Alive	0	0	0	0	0	0	0	0	TCGA-A8-A09G-01	8.03333	0.11
TCGA-A8-A09I	BRCA	Wild	84	FEMALE	[Not Available]	Stage IIA	Alive	0	1371	0	1371	0	1371	0	1371	TCGA-A8-A09I-01	4.3	0.21
TCGA-A8-A09M	BRCA	Wild	75	FEMALE	[Not Available]	Stage IIIC	Alive	0	1006	0	1006	0	1006	0	1006	TCGA-A8-A09M-01	4.36667	0.31
TCGA-A8-A09Q	BRCA	Wild	83	FEMALE	[Not Available]	Stage IIIB	Alive	0	761	0	761	#N/A	#N/A	0	761	TCGA-A8-A09Q-01	4.3	0.94
TCGA-A8-A09R	BRCA	Wild	82	FEMALE	[Not Available]	Stage IIB	Alive	0	273	0	273	0	273	0	273	TCGA-A8-A09R-01	2.16667	0.41
TCGA-A8-A09T	BRCA	Wild	68	FEMALE	[Not Available]	[Discrepancy]	Alive	0	579	0	579	0	579	0	579	TCGA-A8-A09T-01	0.733333	0.26
TCGA-A8-A09V	BRCA	Wild	51	FEMALE	[Not Available]	Stage IIA	Alive	0	457	0	457	0	457	0	457	TCGA-A8-A09V-01	1.03333	0.18
TCGA-A8-A09W	BRCA	Wild	70	FEMALE	[Not Available]	Stage IIIB	Alive	0	30	0	30	#N/A	#N/A	0	30	TCGA-A8-A09W-01	2.7	0.52
TCGA-A8-A09X	BRCA	Wild	62	FEMALE	[Not Available]	Stage IIIC	Dead	1	426	#N/A	426	#N/A	#N/A	0	426	TCGA-A8-A09X-01	1.53333	0.01
TCGA-A8-A09Z	BRCA	Wild	83	FEMALE	[Not Available]	Stage IIB	Alive	0	0	0	0	#N/A	#N/A	0	0	TCGA-A8-A09Z-01	36.9333	26.38
TCGA-A8-A0A1	BRCA	Wild	84	FEMALE	[Not Available]	Stage IIA	Alive	0	365	0	365	0	365	0	365	TCGA-A8-A0A1-01	1.5	0.03
TCGA-A8-A0A2	BRCA	Wild	66	FEMALE	[Not Available]	Stage IIA	Alive	0	579	0	579	0	579	0	579	TCGA-A8-A0A2-01	0.933333	0.12
TCGA-A8-A0A4	BRCA	Wild	73	FEMALE	[Not Available]	Stage IIA	Alive	0	396	0	396	0	396	0	396	TCGA-A8-A0A4-01	0.8	0.25
TCGA-A8-A0A6	BRCA	Wild	64	FEMALE	[Not Available]	Stage IIIC	Alive	0	640	0	640	0	640	0	640	TCGA-A8-A0A6-01	0.866667	0.12
TCGA-A8-A0A7	BRCA	Wild	57	FEMALE	[Not Available]	Stage IIB	Alive	0	30	0	30	0	30	0	30	TCGA-A8-A0A7-01	6.5	0
TCGA-A8-A0A9	BRCA	Wild	80	FEMALE	[Not Available]	Stage IIA	Alive	0	822	0	822	0	822	0	822	TCGA-A8-A0A9-01	1.73333	0.3
TCGA-A8-A0AB	BRCA	Wild	54	FEMALE	[Not Available]	Stage IIA	Alive	0	518	0	518	0	518	0	518	TCGA-A8-A0AB-01	1	0.22
TCGA-A8-A0AD	BRCA	Wild	83	FEMALE	[Not Available]	Stage I	Alive	0	1157	0	1157	0	1157	0	1157	TCGA-A8-A0AD-01	0.8	0.09
TCGA-AC-A23C	BRCA	Wild	62	FEMALE	WHITE	Stage IIB	Alive	0	585	0	585	0	585	0	585	TCGA-AC-A23C-01	3.73333	0.77
TCGA-AC-A23E	BRCA	Wild	50	FEMALE	WHITE	Stage IIB	Alive	0	698	0	698	0	698	0	698	TCGA-AC-A23E-01	0.633333	0.05
TCGA-AC-A23G	BRCA	Wild	76	FEMALE	WHITE	Stage IIA	Alive	0	2248	0	2248	0	2248	0	2248	TCGA-AC-A23G-01	NA	0.01
TCGA-AC-A23H	BRCA	Wild	90	FEMALE	WHITE	Stage IIA	Dead	1	174	1	174	#N/A	#N/A	1	174	TCGA-AC-A23H-01	142.667	0.54
TCGA-AC-A2B8	BRCA	Wild	84	FEMALE	WHITE	Stage IIB	Alive	0	677	0	677	0	677	1	654	TCGA-AC-A2B8-01	2.76667	0.54
TCGA-AC-A2BK	BRCA	Wild	78	FEMALE	BLACK OR AFRICAN AMERICAN	Stage IIIA	Alive	0	2222	0	2222	0	2222	0	2222	TCGA-AC-A2BK-01	2.63333	2.61
TCGA-AC-A2BM	BRCA	Wild	41	FEMALE	BLACK OR AFRICAN AMERICAN	Stage IIB	Alive	0	3022	0	3022	0	3022	0	3022	TCGA-AC-A2BM-01	0.7	0.26
TCGA-AC-A2FB	BRCA	Wild	65	FEMALE	WHITE	Stage IIA	Alive	0	1234	0	1234	0	1234	0	1234	TCGA-AC-A2FB-01	0.333333	0.01
TCGA-AC-A2FE	BRCA	Wild	62	FEMALE	WHITE	Stage IIIC	Dead	1	2636	1	2636	1	766	1	766	TCGA-AC-A2FE-01	0	0
TCGA-AC-A2FF	BRCA	Wild	40	FEMALE	ASIAN	Stage IIB	Alive	0	2759	0	2759	0	2759	0	2759	TCGA-AC-A2FF-01	0.533333	0.21
TCGA-AC-A2FG	BRCA	Wild	79	FEMALE	WHITE	Stage IIB	Alive	0	1853	0	1853	0	1853	0	1853	TCGA-AC-A2FG-01	0.9	0.66
TCGA-AC-A2FK	BRCA	Wild	45	FEMALE	WHITE	Stage IIIC	Alive	0	2650	0	2650	0	2650	0	2650	TCGA-AC-A2FK-01	0.0333333	0
TCGA-AC-A2FM	BRCA	Wild	87	FEMALE	WHITE	Stage IIB	Dead	1	792	1	792	1	780	1	780	TCGA-AC-A2FM-01	0	0.07
TCGA-AC-A2FO	BRCA	Wild	65	FEMALE	WHITE	Stage IIB	Alive	0	2255	0	2255	0	2255	0	2255	TCGA-AC-A2FO-01	0.8	0
TCGA-AC-A2QH	BRCA	Wild	58	FEMALE	WHITE	Stage IIB	Alive	0	1005	0	1005	0	1005	0	1005	TCGA-AC-A2QH-01	0.9	1.54
TCGA-AC-A2QI	BRCA	Wild	76	FEMALE	WHITE	Stage IIIA	Alive	0	588	0	588	0	588	0	588	TCGA-AC-A2QI-01	NA	0
TCGA-AC-A2QJ	BRCA	Wild	48	FEMALE	WHITE	Stage IIIB	Dead	1	446	1	446	1	237	1	237	TCGA-AC-A2QJ-01	0	0
TCGA-AC-A3BB	BRCA	Wild	46	FEMALE	BLACK OR AFRICAN AMERICAN	Stage IIIA	Alive	0	987	0	987	0	987	0	987	TCGA-AC-A3BB-01	NA	0
TCGA-AC-A3EH	BRCA	Wild	79	FEMALE	WHITE	Stage IIIC	Dead	1	197	0	197	0	197	0	197	TCGA-AC-A3EH-01	0	0.18
TCGA-AC-A3HN	BRCA	Wild	87	FEMALE	WHITE	Stage IIB	Alive	0	496	0	496	0	496	0	496	TCGA-AC-A3HN-01	0.433333	0.02
TCGA-AC-A3OD	BRCA	Wild	68	FEMALE	WHITE	Stage IIB	Alive	0	451	0	451	0	451	0	451	TCGA-AC-A3OD-01	0.933333	0.05
TCGA-AC-A3QP	BRCA	Wild	79	FEMALE	WHITE	Stage IIB	Alive	0	675	0	675	0	675	0	675	TCGA-AC-A3QP-01	0.733333	0
TCGA-AC-A3QQ	BRCA	Wild	54	FEMALE	WHITE	Stage IA	Alive	0	734	0	734	#N/A	#N/A	0	734	TCGA-AC-A3QQ-01	0.866667	0.45
TCGA-AC-A3TM	BRCA	Wild	50	FEMALE	WHITE	Stage IIIA	Alive	0	762	0	762	0	762	0	762	TCGA-AC-A3TM-01	0	0
TCGA-AC-A3TN	BRCA	Wild	75	FEMALE	WHITE	Stage IIB	Alive	0	456	0	456	0	456	0	456	TCGA-AC-A3TN-01	0	0
TCGA-AC-A3W5	BRCA	Wild	65	FEMALE	BLACK OR AFRICAN AMERICAN	Stage IIA	Alive	0	504	0	504	#N/A	#N/A	0	504	TCGA-AC-A3W5-01	4.03333	0.05
TCGA-AC-A3W6	BRCA	Wild	90	FEMALE	WHITE	Stage IIIA	Alive	0	602	0	602	0	602	0	602	TCGA-AC-A3W6-01	NA	0
TCGA-AC-A3W7	BRCA	Wild	66	FEMALE	WHITE	Stage IIB	Alive	0	471	0	471	0	471	0	471	TCGA-AC-A3W7-01	0	0.01
TCGA-AC-A3YI	BRCA	Wild	74	FEMALE	WHITE	Stage IIIC	Alive	0	707	0	707	0	707	0	707	TCGA-AC-A3YI-01	0.466667	0
TCGA-AC-A3YJ	BRCA	Wild	66	FEMALE	WHITE	Stage IIA	Alive	0	754	0	754	0	754	0	754	TCGA-AC-A3YJ-01	0.566667	0
TCGA-AC-A4ZE	BRCA	Wild	63	FEMALE	WHITE	Stage IIB	Alive	0	890	0	890	0	890	0	890	TCGA-AC-A4ZE-01	1.5	0.43
TCGA-AC-A5EI	BRCA	Wild	88	FEMALE	WHITE	Stage IB	Alive	0	442	0	442	0	442	0	442	TCGA-AC-A5EI-01	0.966667	0.16
TCGA-AC-A5XS	BRCA	Wild	74	FEMALE	WHITE	Stage IIA	Alive	0	588	0	588	0	588	0	588	TCGA-AC-A5XS-01	27.1333	0
TCGA-AC-A5XU	BRCA	Wild	74	FEMALE	BLACK OR AFRICAN AMERICAN	Stage IIB	Alive	0	455	0	455	0	455	0	455	TCGA-AC-A5XU-01	1.86667	0.25
TCGA-AC-A62V	BRCA	Wild	58	MALE	BLACK OR AFRICAN AMERICAN	Stage IV	Dead	1	348	1	348	#N/A	#N/A	1	348	TCGA-AC-A62V-01	2.26667	0.07
TCGA-AC-A62X	BRCA	Wild	72	FEMALE	BLACK OR AFRICAN AMERICAN	Stage IIA	Alive	0	417	0	417	0	417	0	417	TCGA-AC-A62X-01	1.76667	0.68
TCGA-AC-A62Y	BRCA	Wild	79	FEMALE	WHITE	Stage IIB	Alive	0	530	0	530	#N/A	#N/A	0	530	TCGA-AC-A62Y-01	1.9	0.02
TCGA-AC-A6IV	BRCA	Wild	47	FEMALE	WHITE	Stage IIB	Alive	0	568	0	568	0	568	0	568	TCGA-AC-A6IV-01	0.6	0
TCGA-AC-A6IW	BRCA	Wild	73	FEMALE	BLACK OR AFRICAN AMERICAN	Stage IIA	Alive	0	413	0	413	0	413	0	413	TCGA-AC-A6IW-01	4.36667	0.32
TCGA-AC-A6IX	BRCA	Wild	49	FEMALE	WHITE	Stage IIIC	Alive	0	373	0	373	0	373	0	373	TCGA-AC-A6IX-01	1.63333	0
TCGA-AC-A6NO	BRCA	Wild	43	FEMALE	BLACK OR AFRICAN AMERICAN	Stage IIB	Alive	0	51	0	51	0	51	0	51	TCGA-AC-A6NO-01	0.866667	0.01
TCGA-AC-A7VB	BRCA	Wild	51	FEMALE	BLACK OR AFRICAN AMERICAN	Stage IIA	Alive	0	250	0	250	0	250	0	250	TCGA-AC-A7VB-01	0.733333	0.19
TCGA-AC-A7VC	BRCA	Wild	56	FEMALE	WHITE	Stage IIB	Alive	0	1	0	1	0	1	0	1	TCGA-AC-A7VC-01	0.5	0.02
TCGA-AC-A8OP	BRCA	Wild	72	FEMALE	BLACK OR AFRICAN AMERICAN	Stage IA	Alive	0	614	0	614	0	614	0	614	TCGA-AC-A8OP-01	4.63333	0.05
TCGA-AC-A8OQ	BRCA	Wild	72	FEMALE	BLACK OR AFRICAN AMERICAN	Stage IIB	Alive	0	34	0	34	0	34	0	34	TCGA-AC-A8OQ-01	2.6	0.32
TCGA-AC-A8OR	BRCA	Wild	75	FEMALE	WHITE	Stage IA	Alive	0	40	0	40	0	40	0	40	TCGA-AC-A8OR-01	1.93333	0.06
TCGA-AC-A8OS	BRCA	Wild	71	FEMALE	WHITE	Stage IIA	Alive	0	70	0	70	0	70	0	70	TCGA-AC-A8OS-01	1.36667	0.01
TCGA-AN-A03X	BRCA	Wild	74	FEMALE	WHITE	Stage IIA	Alive	0	10	0	10	0	10	0	10	TCGA-AN-A03X-01	1.16667	0.22
TCGA-AN-A03Y	BRCA	Wild	66	FEMALE	WHITE	Stage IIA	Alive	0	10	0	10	0	10	0	10	TCGA-AN-A03Y-01	0.933333	0.92
TCGA-AN-A041	BRCA	Wild	29	FEMALE	WHITE	Stage IIB	Alive	0	7	0	7	0	7	0	7	TCGA-AN-A041-01	0.933333	0.32
TCGA-AN-A046	BRCA	Wild	68	FEMALE	WHITE	Stage IIA	Alive	0	10	0	10	0	10	0	10	TCGA-AN-A046-01	180.833	0.04
TCGA-AN-A049	BRCA	Wild	62	FEMALE	WHITE	Stage IIA	Alive	0	19	0	19	#N/A	#N/A	0	19	TCGA-AN-A049-01	0.966667	0.37
TCGA-AN-A04A	BRCA	Wild	36	FEMALE	WHITE	Stage IIIA	Alive	0	90	0	90	#N/A	#N/A	0	90	TCGA-AN-A04A-01	1.36667	0.34
TCGA-AN-A04C	BRCA	Wild	51	FEMALE	WHITE	Stage IIB	Alive	0	54	0	54	#N/A	#N/A	0	54	TCGA-AN-A04C-01	2.23333	0.75
TCGA-AN-A04D	BRCA	Wild	58	FEMALE	WHITE	Stage IIB	Alive	0	52	0	52	#N/A	#N/A	0	52	TCGA-AN-A04D-01	2.8	0.66
TCGA-AN-A0AJ	BRCA	Wild	79	FEMALE	WHITE	Stage IIB	Alive	0	303	0	303	0	303	0	303	TCGA-AN-A0AJ-01	2.56667	1.25
TCGA-AN-A0AK	BRCA	Wild	76	FEMALE	WHITE	Stage IIA	Alive	0	224	0	224	0	224	0	224	TCGA-AN-A0AK-01	37.3667	32.92
TCGA-AN-A0AL	BRCA	Wild	41	FEMALE	WHITE	Stage IIIB	Alive	0	227	0	227	0	227	0	227	TCGA-AN-A0AL-01	2.66667	0.87
TCGA-AN-A0AM	BRCA	Wild	56	FEMALE	WHITE	Stage IIA	Alive	0	5	0	5	0	5	0	5	TCGA-AN-A0AM-01	2.93333	0.09
TCGA-AN-A0AR	BRCA	Wild	55	FEMALE	WHITE	Stage IIA	Alive	0	10	0	10	0	10	0	10	TCGA-AN-A0AR-01	3.66667	2.5
TCGA-AN-A0AS	BRCA	Wild	70	FEMALE	WHITE	Stage IIIA	Alive	0	10	0	10	0	10	0	10	TCGA-AN-A0AS-01	1.4	0.25
TCGA-AN-A0AT	BRCA	Wild	62	FEMALE	WHITE	Stage IIA	Alive	0	10	0	10	0	10	0	10	TCGA-AN-A0AT-01	3.93333	1.3
TCGA-AN-A0FD	BRCA	Wild	71	FEMALE	WHITE	Stage IIA	Alive	0	196	0	196	0	196	0	196	TCGA-AN-A0FD-01	1.06667	0.25
TCGA-AN-A0FF	BRCA	Wild	32	FEMALE	WHITE	Stage IA	Alive	0	172	0	172	0	172	0	172	TCGA-AN-A0FF-01	0.666667	0.05
TCGA-AN-A0FJ	BRCA	Wild	59	FEMALE	WHITE	Stage IV	Alive	0	242	0	242	#N/A	#N/A	0	242	TCGA-AN-A0FJ-01	2.63333	1.15
TCGA-AN-A0FK	BRCA	Wild	88	FEMALE	WHITE	Stage IIIB	Alive	0	213	0	213	0	213	0	213	TCGA-AN-A0FK-01	1.16667	0.07
TCGA-AN-A0FL	BRCA	Wild	62	FEMALE	WHITE	Stage IIA	Alive	0	231	0	231	0	231	0	231	TCGA-AN-A0FL-01	5.06667	0.62
TCGA-AN-A0FN	BRCA	Wild	61	FEMALE	WHITE	Stage IA	Alive	0	218	0	218	0	218	0	218	TCGA-AN-A0FN-01	1.33333	0.05
TCGA-AN-A0FS	BRCA	Wild	55	FEMALE	WHITE	Stage IA	Alive	0	210	0	210	0	210	0	210	TCGA-AN-A0FS-01	2.03333	0.1
TCGA-AN-A0FT	BRCA	Wild	63	FEMALE	WHITE	Stage IIB	Alive	0	214	0	214	0	214	0	214	TCGA-AN-A0FT-01	2.8	0.5
TCGA-AN-A0FV	BRCA	Wild	58	FEMALE	WHITE	Stage IIA	Alive	0	10	0	10	0	10	0	10	TCGA-AN-A0FV-01	2.7	0.67
TCGA-AN-A0FW	BRCA	Wild	67	FEMALE	WHITE	Stage IIIA	Alive	0	11	0	11	0	11	0	11	TCGA-AN-A0FW-01	3.56667	0.56
TCGA-AN-A0FX	BRCA	Wild	52	FEMALE	WHITE	Stage IIA	Alive	0	10	0	10	0	10	0	10	TCGA-AN-A0FX-01	4	0.53
TCGA-AN-A0FY	BRCA	Wild	55	FEMALE	WHITE	Stage IA	Alive	0	10	0	10	0	10	0	10	TCGA-AN-A0FY-01	1.6	1.39
TCGA-AN-A0FZ	BRCA	Wild	45	FEMALE	WHITE	Stage IIIA	Alive	0	10	0	10	0	10	0	10	TCGA-AN-A0FZ-01	2.23333	0.5
TCGA-AN-A0G0	BRCA	Wild	56	FEMALE	WHITE	Stage IIA	Alive	0	16	0	16	0	16	0	16	TCGA-AN-A0G0-01	1.06667	0.73
TCGA-AN-A0XL	BRCA	Wild	61	FEMALE	WHITE	Stage IIA	Alive	0	163	0	163	0	163	0	163	TCGA-AN-A0XL-01	1.1	0.09
TCGA-AN-A0XN	BRCA	Wild	68	FEMALE	WHITE	Stage IIIA	Alive	0	10	0	10	0	10	0	10	TCGA-AN-A0XN-01	4.86667	0.45
TCGA-AN-A0XO	BRCA	Wild	59	FEMALE	WHITE	Stage IIIA	Alive	0	375	0	375	0	375	0	375	TCGA-AN-A0XO-01	1.1	0.1
TCGA-AN-A0XP	BRCA	Wild	69	FEMALE	WHITE	Stage IIIA	Alive	0	9	0	9	0	9	0	9	TCGA-AN-A0XP-01	0.866667	0.03
TCGA-AN-A0XR	BRCA	Wild	55	FEMALE	WHITE	Stage IIIA	Alive	0	10	0	10	0	10	0	10	TCGA-AN-A0XR-01	1	0.36
TCGA-AN-A0XS	BRCA	Wild	63	FEMALE	WHITE	Stage IIIA	Alive	0	10	0	10	0	10	0	10	TCGA-AN-A0XS-01	0.866667	0.04
TCGA-AN-A0XT	BRCA	Wild	54	FEMALE	WHITE	Stage IIIA	Alive	0	10	0	10	0	10	0	10	TCGA-AN-A0XT-01	0.366667	0.31
TCGA-AN-A0XU	BRCA	Wild	54	FEMALE	WHITE	Stage IIA	Alive	0	10	0	10	0	10	0	10	TCGA-AN-A0XU-01	3.83333	1.04
TCGA-AN-A0XV	BRCA	Wild	67	FEMALE	WHITE	Stage IIIA	Alive	0	162	0	162	0	162	0	162	TCGA-AN-A0XV-01	1.06667	0.08
TCGA-AN-A0XW	BRCA	Wild	36	FEMALE	WHITE	Stage IIIA	Alive	0	170	0	170	0	170	0	170	TCGA-AN-A0XW-01	9.6	0.21
TCGA-AO-A03L	BRCA	Wild	34	FEMALE	ASIAN	Stage IIIA	Alive	0	2442	0	2442	0	2442	0	2442	TCGA-AO-A03L-01	0.933333	0.1
TCGA-AO-A03M	BRCA	Wild	29	FEMALE	WHITE	Stage I	Alive	0	1866	0	1866	0	1866	0	1866	TCGA-AO-A03M-01	25.2667	0.07
TCGA-AO-A03N	BRCA	Wild	59	FEMALE	WHITE	Stage IIB	Alive	0	2031	0	2031	1	1645	1	1645	TCGA-AO-A03N-01	3	0.23
TCGA-AO-A03O	BRCA	Wild	69	FEMALE	BLACK OR AFRICAN AMERICAN	Stage IIA	Dead	1	2483	0	2483	0	2483	0	2483	TCGA-AO-A03O-01	2.46667	0.88
TCGA-AO-A03P	BRCA	Wild	54	FEMALE	BLACK OR AFRICAN AMERICAN	Stage IIB	Dead	1	2911	1	2911	#N/A	#N/A	1	1922	TCGA-AO-A03P-01	1.33333	1.02
TCGA-AO-A03R	BRCA	Wild	57	FEMALE	WHITE	Stage IIB	Alive	0	2091	0	2091	0	2091	0	2091	TCGA-AO-A03R-01	1.23333	0.09
TCGA-AO-A03T	BRCA	Wild	42	FEMALE	WHITE	Stage IIB	Alive	0	2124	0	2124	0	2124	0	2124	TCGA-AO-A03T-01	2.96667	0.02
TCGA-AO-A03U	BRCA	Wild	31	FEMALE	WHITE	Stage I	Dead	1	1793	0	1793	0	1793	1	1614	TCGA-AO-A03U-01	0.166667	0.01
TCGA-AO-A03V	BRCA	Wild	41	FEMALE	WHITE	Stage I	Alive	0	1351	0	1351	0	1351	0	1351	TCGA-AO-A03V-01	1.7	0.23
TCGA-AO-A0J2	BRCA	Wild	41	FEMALE	WHITE	Stage IA	Alive	0	997	0	997	0	997	0	997	TCGA-AO-A0J2-01	1.76667	1.15
TCGA-AO-A0J3	BRCA	Wild	67	FEMALE	WHITE	Stage IIB	Alive	0	651	0	651	0	651	0	651	TCGA-AO-A0J3-01	2.53333	0.77
TCGA-AO-A0J4	BRCA	Wild	41	FEMALE	BLACK OR AFRICAN AMERICAN	Stage IA	Alive	0	1587	0	1587	0	1587	0	1587	TCGA-AO-A0J4-01	3.46667	0.14
TCGA-AO-A0J5	BRCA	Wild	48	FEMALE	WHITE	Stage IV	Dead	1	792	1	792	#N/A	#N/A	1	792	TCGA-AO-A0J5-01	1.76667	0.12
TCGA-AO-A0J6	BRCA	Wild	61	FEMALE	WHITE	Stage IIA	Alive	0	1140	0	1140	0	1140	0	1140	TCGA-AO-A0J6-01	3.33333	0.67
TCGA-AO-A0J7	BRCA	Wild	71	FEMALE	WHITE	Stage IIB	Alive	0	618	0	618	0	618	0	618	TCGA-AO-A0J7-01	0.6	1.24
TCGA-AO-A0J8	BRCA	Wild	61	FEMALE	WHITE	Stage IIA	Alive	0	680	0	680	0	680	0	680	TCGA-AO-A0J8-01	0.733333	0.15
TCGA-AO-A0J9	BRCA	Wild	61	FEMALE	WHITE	Stage IIIC	Alive	0	1613	0	1613	1	1066	1	1066	TCGA-AO-A0J9-01	3.56667	0.05
TCGA-AO-A0JA	BRCA	Wild	36	FEMALE	BLACK OR AFRICAN AMERICAN	Stage IIIC	Alive	0	655	0	655	1	143	1	143	TCGA-AO-A0JA-01	0.7	0.11
TCGA-AO-A0JB	BRCA	Wild	50	FEMALE	WHITE	Stage IIIA	Alive	0	1542	0	1542	0	1542	0	1542	TCGA-AO-A0JB-01	3.13333	0.96
TCGA-AO-A0JC	BRCA	Wild	64	FEMALE	WHITE	Stage IIA	Alive	0	1547	0	1547	0	1547	0	1547	TCGA-AO-A0JC-01	4.56667	0.01
TCGA-AO-A0JD	BRCA	Wild	59	FEMALE	WHITE	Stage IIIA	Alive	0	2190	0	2190	0	2190	0	2190	TCGA-AO-A0JD-01	3.36667	0.18
TCGA-AO-A0JE	BRCA	Wild	53	FEMALE	BLACK OR AFRICAN AMERICAN	Stage IIIA	Alive	0	2335	0	2335	#N/A	#N/A	0	2335	TCGA-AO-A0JE-01	1.5	0.15
TCGA-AO-A0JF	BRCA	Wild	68	FEMALE	WHITE	Stage IIA	Alive	0	1980	0	1980	0	1980	0	1980	TCGA-AO-A0JF-01	0.866667	0
TCGA-AO-A0JG	BRCA	Wild	49	FEMALE	WHITE	Stage IIIA	Alive	0	798	0	798	#N/A	#N/A	0	798	TCGA-AO-A0JG-01	0.533333	0.02
TCGA-AO-A0JI	BRCA	Wild	56	FEMALE	WHITE	Stage IIA	Alive	0	1528	0	1528	0	1528	0	1528	TCGA-AO-A0JI-01	0.466667	0.28
TCGA-AO-A0JJ	BRCA	Wild	54	FEMALE	WHITE	Stage IIB	Alive	0	1887	0	1887	0	1887	0	1887	TCGA-AO-A0JJ-01	0.5	0.03
TCGA-AO-A0JL	BRCA	Wild	59	FEMALE	WHITE	Stage IIIA	Alive	0	1683	0	1683	0	1683	0	1683	TCGA-AO-A0JL-01	0	1.34
TCGA-AO-A0JM	BRCA	Wild	40	FEMALE	[Not Available]	Stage IIB	Alive	0	2184	0	2184	0	2184	0	2184	TCGA-AO-A0JM-01	1.16667	0.38
TCGA-AO-A124	BRCA	Wild	38	FEMALE	WHITE	Stage IIA	Alive	0	3506	0	3506	0	3506	0	3506	TCGA-AO-A124-01	4.53333	2.42
TCGA-AO-A125	BRCA	Wild	72	FEMALE	BLACK OR AFRICAN AMERICAN	Stage IIA	Alive	0	3456	0	3456	0	3456	0	3456	TCGA-AO-A125-01	1.03333	0.2
TCGA-AO-A126	BRCA	Wild	39	FEMALE	ASIAN	Stage IIA	Alive	0	3307	0	3307	1	267	1	267	TCGA-AO-A126-01	0.633333	0.16
TCGA-AO-A128	BRCA	Wild	61	FEMALE	WHITE	Stage IIA	Alive	0	3248	0	3248	0	3248	0	3248	TCGA-AO-A128-01	27.9667	1.03
TCGA-AO-A129	BRCA	Wild	29	FEMALE	WHITE	Stage IIB	Alive	0	3286	0	3286	0	3286	0	3286	TCGA-AO-A129-01	3.66667	0.07
TCGA-AO-A12A	BRCA	Wild	47	FEMALE	WHITE	Stage IIA	Alive	0	3112	0	3112	#N/A	#N/A	0	3112	TCGA-AO-A12A-01	0.466667	0.02
TCGA-AO-A12B	BRCA	Wild	63	FEMALE	WHITE	Stage IIA	Alive	0	2989	0	2989	0	2989	0	2989	TCGA-AO-A12B-01	0.6	0.15
TCGA-AO-A12D	BRCA	Wild	43	FEMALE	WHITE	Stage IIA	Alive	0	2515	0	2515	0	2515	0	2515	TCGA-AO-A12D-01	1.76667	0.07
TCGA-AO-A12E	BRCA	Wild	51	FEMALE	WHITE	Stage IIB	Alive	0	2142	0	2142	0	2142	0	2142	TCGA-AO-A12E-01	0.9	0
TCGA-AO-A12F	BRCA	Wild	36	FEMALE	WHITE	Stage IIA	Alive	0	1842	0	1842	0	1842	0	1842	TCGA-AO-A12F-01	1.16667	1.59
TCGA-AO-A12G	BRCA	Wild	75	FEMALE	WHITE	Stage IIA	Alive	0	1639	0	1639	0	1639	0	1639	TCGA-AO-A12G-01	1.13333	0.16
TCGA-AO-A12H	BRCA	Wild	69	FEMALE	BLACK OR AFRICAN AMERICAN	Stage IIA	Alive	0	1234	0	1234	0	1234	0	1234	TCGA-AO-A12H-01	0.7	0.02
TCGA-AO-A1KO	BRCA	Wild	46	FEMALE	WHITE	Stage IIB	Alive	0	622	0	622	0	622	0	622	TCGA-AO-A1KO-01	0.166667	0.53
TCGA-AO-A1KP	BRCA	Wild	77	FEMALE	WHITE	Stage IIA	Alive	0	2953	0	2953	0	2953	0	2953	TCGA-AO-A1KP-01	0.533333	0.23
TCGA-AO-A1KQ	BRCA	Wild	84	MALE	WHITE	Stage IIIB	Alive	0	1882	0	1882	0	1882	0	1882	TCGA-AO-A1KQ-01	0	NA
TCGA-AO-A1KR	BRCA	Wild	51	FEMALE	WHITE	Stage IIA	Alive	0	2513	0	2513	0	2513	0	2513	TCGA-AO-A1KR-01	2.13333	0.18
TCGA-AO-A1KS	BRCA	Wild	69	FEMALE	WHITE	Stage IIA	Alive	0	350	0	350	0	350	0	350	TCGA-AO-A1KS-01	1.1	0.26
TCGA-AO-A1KT	BRCA	Wild	78	FEMALE	WHITE	Stage IIA	Alive	0	541	0	541	0	541	0	541	TCGA-AO-A1KT-01	1.16667	0.96
TCGA-AQ-A04H	BRCA	Wild	61	FEMALE	WHITE	Stage IIIA	Alive	0	754	0	754	0	754	0	754	TCGA-AQ-A04H-01	2	0.73
TCGA-AQ-A04J	BRCA	Wild	45	FEMALE	WHITE	Stage IIA	Alive	0	819	0	819	0	819	0	819	TCGA-AQ-A04J-01	2.3	0.01
TCGA-AQ-A04L	BRCA	Wild	48	FEMALE	WHITE	Stage IIA	Alive	0	3957	0	3957	0	3957	0	3957	TCGA-AQ-A04L-01	0	1.8
TCGA-AQ-A0Y5	BRCA	Wild	70	FEMALE	WHITE	Stage IIIA	Dead	1	172	0	172	0	172	0	172	TCGA-AQ-A0Y5-01	1.83333	0.27
TCGA-AQ-A1H2	BRCA	Wild	84	FEMALE	WHITE	Stage IIIA	Alive	0	475	0	475	0	475	0	475	TCGA-AQ-A1H2-01	0.8	0.19
TCGA-AQ-A1H3	BRCA	Wild	49	FEMALE	WHITE	Stage IIIC	Alive	0	989	0	989	0	989	0	989	TCGA-AQ-A1H3-01	0.666667	0.28
TCGA-AQ-A54N	BRCA	Wild	51	FEMALE	BLACK OR AFRICAN AMERICAN	Stage IIA	Alive	0	78	0	78	0	78	0	78	TCGA-AQ-A54N-01	0	1.1
TCGA-AQ-A54O	BRCA	Wild	51	MALE	BLACK OR AFRICAN AMERICAN	Stage IIA	Alive	0	1001	0	1001	0	1001	0	1001	TCGA-AQ-A54O-01	0.6	0.08
TCGA-AQ-A7U7	BRCA	Wild	55	FEMALE	WHITE	Stage IIIA	Dead	1	584	0	584	0	584	0	584	TCGA-AQ-A7U7-01	1.93333	0
TCGA-AR-A0TP	BRCA	Wild	43	FEMALE	WHITE	Stage IIA	Alive	0	4275	0	4275	0	4275	0	4275	TCGA-AR-A0TP-01	1.8	1.38
TCGA-AR-A0TQ	BRCA	Wild	27	FEMALE	WHITE	Stage IIIA	Alive	0	2991	0	2991	0	2991	0	2991	TCGA-AR-A0TQ-01	1.06667	0.13
TCGA-AR-A0TR	BRCA	Wild	68	FEMALE	WHITE	Stage IIB	Dead	1	160	#N/A	160	0	160	0	160	TCGA-AR-A0TR-01	1.03333	0.26
TCGA-AR-A0TS	BRCA	Wild	46	FEMALE	WHITE	Stage IIB	Alive	0	2558	0	2558	0	2558	0	2558	TCGA-AR-A0TS-01	2.3	0
TCGA-AR-A0TT	BRCA	Wild	53	FEMALE	BLACK OR AFRICAN AMERICAN	Stage IIIA	Alive	0	3316	0	3316	0	3316	0	3316	TCGA-AR-A0TT-01	1.83333	0.22
TCGA-AR-A0TU	BRCA	Wild	35	FEMALE	[Not Available]	Stage IIA	Alive	0	709	0	709	0	709	0	709	TCGA-AR-A0TU-01	2.06667	1.08
TCGA-AR-A0TV	BRCA	Wild	66	FEMALE	[Not Available]	Stage IIA	Alive	0	2288	0	2288	0	2288	0	2288	TCGA-AR-A0TV-01	1.9	0.3
TCGA-AR-A0TW	BRCA	Wild	50	FEMALE	WHITE	Stage IIIA	Alive	0	3009	0	3009	1	739	1	739	TCGA-AR-A0TW-01	1.6	0.2
TCGA-AR-A0TX	BRCA	Wild	64	FEMALE	[Not Available]	Stage IIA	Alive	0	1972	0	1972	0	1972	0	1972	TCGA-AR-A0TX-01	9.3	0.08
TCGA-AR-A0TY	BRCA	Wild	54	FEMALE	WHITE	Stage IIA	Dead	1	1699	1	1699	1	544	1	544	TCGA-AR-A0TY-01	2.7	0.75
TCGA-AR-A0TZ	BRCA	Wild	43	FEMALE	WHITE	[Discrepancy]	Dead	1	3262	#N/A	3262	1	1313	1	1313	TCGA-AR-A0TZ-01	1.86667	0.45
TCGA-AR-A0U0	BRCA	Wild	73	FEMALE	WHITE	Stage IIB	Alive	0	1988	0	1988	0	1988	0	1988	TCGA-AR-A0U0-01	1.23333	0.78
TCGA-AR-A0U1	BRCA	Wild	36	FEMALE	WHITE	Stage IIB	Alive	0	4052	0	4052	0	4052	0	4052	TCGA-AR-A0U1-01	2.56667	0.15
TCGA-AR-A0U2	BRCA	Wild	47	FEMALE	WHITE	Stage IIIA	Dead	1	2551	1	2551	1	1609	1	1609	TCGA-AR-A0U2-01	1.43333	1.19
TCGA-AR-A0U3	BRCA	Wild	59	FEMALE	WHITE	Stage IIB	Alive	0	4080	0	4080	0	4080	0	4080	TCGA-AR-A0U3-01	1.03333	0.58
TCGA-AR-A0U4	BRCA	Wild	54	FEMALE	WHITE	Stage IIA	Alive	0	3261	0	3261	0	3261	0	3261	TCGA-AR-A0U4-01	4.83333	0.17
TCGA-AR-A1AH	BRCA	Wild	51	FEMALE	WHITE	Stage IIB	Alive	0	3807	0	3807	0	3807	1	1136	TCGA-AR-A1AH-01	2.66667	1.35
TCGA-AR-A1AI	BRCA	Wild	47	FEMALE	WHITE	Stage IIA	Alive	0	3296	0	3296	1	588	1	588	TCGA-AR-A1AI-01	2.33333	0.79
TCGA-AR-A1AJ	BRCA	Wild	83	FEMALE	WHITE	Stage I	Alive	0	3072	0	3072	0	3072	0	3072	TCGA-AR-A1AJ-01	1.4	0
TCGA-AR-A1AK	BRCA	Wild	70	FEMALE	WHITE	Stage I	Alive	0	3159	0	3159	0	3159	0	3159	TCGA-AR-A1AK-01	1.93333	0.07
TCGA-AR-A1AL	BRCA	Wild	60	FEMALE	WHITE	Stage IIIA	Alive	0	2971	0	2971	0	2971	0	2971	TCGA-AR-A1AL-01	0.8	0.01
TCGA-AR-A1AM	BRCA	Wild	52	FEMALE	WHITE	Stage IIIA	Alive	0	2991	0	2991	0	2991	0	2991	TCGA-AR-A1AM-01	NA	0
TCGA-AR-A1AN	BRCA	Wild	46	FEMALE	WHITE	Stage IIA	Alive	0	2920	0	2920	0	2920	0	2920	TCGA-AR-A1AN-01	0.833333	0.23
TCGA-AR-A1AO	BRCA	Wild	47	FEMALE	WHITE	Stage IIA	Alive	0	2618	0	2618	0	2618	0	2618	TCGA-AR-A1AO-01	3	0
TCGA-AR-A1AP	BRCA	Wild	80	FEMALE	WHITE	Stage I	Alive	0	2856	0	2856	0	2856	0	2856	TCGA-AR-A1AP-01	1.06667	0.69
TCGA-AR-A1AQ	BRCA	Wild	49	FEMALE	WHITE	Stage IIA	Alive	0	3021	0	3021	0	3021	0	3021	TCGA-AR-A1AQ-01	1.26667	0.39
TCGA-AR-A1AR	BRCA	Wild	50	FEMALE	WHITE	Stage IIIA	Dead	1	524	1	524	1	268	1	268	TCGA-AR-A1AR-01	1.56667	0.03
TCGA-AR-A1AS	BRCA	Wild	54	FEMALE	ASIAN	Stage IIB	Alive	0	1150	0	1150	0	1150	0	1150	TCGA-AR-A1AS-01	0.966667	0.17
TCGA-AR-A1AT	BRCA	Wild	62	FEMALE	WHITE	Stage IIA	Dead	1	1272	#N/A	1272	0	1272	0	1272	TCGA-AR-A1AT-01	0.9	0.07
TCGA-AR-A1AU	BRCA	Wild	39	FEMALE	WHITE	Stage IIIA	Alive	0	2868	0	2868	0	2868	0	2868	TCGA-AR-A1AU-01	0.6	0.16
TCGA-AR-A1AV	BRCA	Wild	68	MALE	WHITE	Stage IIB	Alive	0	1864	0	1864	0	1864	0	1864	TCGA-AR-A1AV-01	1.4	0.47
TCGA-AR-A1AW	BRCA	Wild	65	FEMALE	WHITE	Stage IIA	Alive	0	2632	0	2632	0	2632	0	2632	TCGA-AR-A1AW-01	1	0.02
TCGA-AR-A1AX	BRCA	Wild	64	FEMALE	WHITE	Stage I	Alive	0	2629	0	2629	0	2629	0	2629	TCGA-AR-A1AX-01	0.866667	0
TCGA-AR-A1AY	BRCA	Wild	65	FEMALE	WHITE	Stage I	Alive	0	1026	0	1026	0	1026	0	1026	TCGA-AR-A1AY-01	1.9	1.18
TCGA-AR-A24H	BRCA	Wild	65	FEMALE	WHITE	Stage IIA	Alive	0	4894	0	4894	0	4894	0	4894	TCGA-AR-A24H-01	4.16667	0.61
TCGA-AR-A24K	BRCA	Wild	46	FEMALE	WHITE	Stage IIA	Alive	0	1548	0	1548	0	1548	0	1548	TCGA-AR-A24K-01	0.966667	1.28
TCGA-AR-A24L	BRCA	Wild	26	FEMALE	WHITE	Stage IIB	Dead	1	2866	1	2866	1	1414	1	1414	TCGA-AR-A24L-01	1.33333	0.09
TCGA-AR-A24M	BRCA	Wild	38	FEMALE	WHITE	Stage IIIA	Alive	0	3660	0	3660	0	3660	0	3660	TCGA-AR-A24M-01	0.466667	0.28
TCGA-AR-A24N	BRCA	Wild	54	FEMALE	WHITE	Stage I	Alive	0	3035	0	3035	0	3035	0	3035	TCGA-AR-A24N-01	1.06667	0.05
TCGA-AR-A24O	BRCA	Wild	43	FEMALE	WHITE	Stage IIIA	Alive	0	3607	0	3607	1	2561	1	2561	TCGA-AR-A24O-01	0.666667	0.08
TCGA-AR-A24P	BRCA	Wild	47	FEMALE	WHITE	Stage I	Alive	0	84	0	84	0	84	0	84	TCGA-AR-A24P-01	0.7	0.21
TCGA-AR-A24Q	BRCA	Wild	49	FEMALE	WHITE	Stage IIB	Alive	0	3172	0	3172	0	3172	0	3172	TCGA-AR-A24Q-01	5.43333	0.42
TCGA-AR-A24R	BRCA	Wild	45	FEMALE	WHITE	Stage IIIA	Alive	0	3430	0	3430	0	3430	0	3430	TCGA-AR-A24R-01	0.733333	0.72
TCGA-AR-A24S	BRCA	Wild	61	FEMALE	WHITE	Stage I	Alive	0	2976	0	2976	0	2976	0	2976	TCGA-AR-A24S-01	1.46667	0.04
TCGA-AR-A24T	BRCA	Wild	46	FEMALE	WHITE	Stage IIIC	Alive	0	3202	0	3202	0	3202	0	3202	TCGA-AR-A24T-01	0.766667	0.17
TCGA-AR-A24U	BRCA	Wild	47	FEMALE	WHITE	Stage IIA	Alive	0	3128	0	3128	0	3128	0	3128	TCGA-AR-A24U-01	1.13333	0.49
TCGA-AR-A24V	BRCA	Wild	52	FEMALE	WHITE	Stage IIB	Alive	0	3203	0	3203	0	3203	0	3203	TCGA-AR-A24V-01	0.666667	0.59
TCGA-AR-A24W	BRCA	Wild	55	FEMALE	WHITE	Stage IIB	Alive	0	1550	0	1550	0	1550	0	1550	TCGA-AR-A24W-01	0.466667	0.03
TCGA-AR-A24X	BRCA	Wild	52	FEMALE	WHITE	Stage IIA	Alive	0	3004	0	3004	0	3004	0	3004	TCGA-AR-A24X-01	0.9	1.71
TCGA-AR-A24Z	BRCA	Wild	57	FEMALE	WHITE	Stage IIA	Alive	0	3001	0	3001	0	3001	0	3001	TCGA-AR-A24Z-01	1.43333	1.07
TCGA-AR-A250	BRCA	Wild	58	FEMALE	WHITE	Stage IIA	Alive	0	2707	0	2707	0	2707	0	2707	TCGA-AR-A250-01	3.93333	1.63
TCGA-AR-A251	BRCA	Wild	51	FEMALE	WHITE	Stage IIIA	Alive	0	3030	0	3030	0	3030	0	3030	TCGA-AR-A251-01	5.3	1.79
TCGA-AR-A252	BRCA	Wild	50	FEMALE	WHITE	Stage I	Alive	0	2838	0	2838	0	2838	0	2838	TCGA-AR-A252-01	0.466667	0.21
TCGA-AR-A254	BRCA	Wild	50	FEMALE	WHITE	Stage IIIA	Alive	0	2605	0	2605	0	2605	0	2605	TCGA-AR-A254-01	1.1	0.52
TCGA-AR-A255	BRCA	Wild	62	FEMALE	WHITE	Stage I	Alive	0	2161	0	2161	0	2161	0	2161	TCGA-AR-A255-01	2.23333	1.78
TCGA-AR-A256	BRCA	Wild	45	FEMALE	WHITE	Stage IIA	Dead	1	2854	#N/A	2854	1	1640	1	1640	TCGA-AR-A256-01	5.66667	4.53
TCGA-AR-A2LE	BRCA	Wild	69	FEMALE	WHITE	Stage I	Alive	0	5062	0	5062	0	5062	1	4203	TCGA-AR-A2LE-01	8.63333	0.03
TCGA-AR-A2LH	BRCA	Wild	55	FEMALE	WHITE	Stage III	Dead	1	616	#N/A	616	1	434	1	434	TCGA-AR-A2LH-01	2	0.01
TCGA-AR-A2LJ	BRCA	Wild	40	FEMALE	WHITE	Stage IIIA	Alive	0	2632	0	2632	0	2632	0	2632	TCGA-AR-A2LJ-01	0	0.01
TCGA-AR-A2LK	BRCA	Wild	62	FEMALE	WHITE	Stage III	Dead	1	1649	#N/A	1649	1	1304	1	1304	TCGA-AR-A2LK-01	1.06667	1.05
TCGA-AR-A2LM	BRCA	Wild	49	FEMALE	WHITE	Stage II	Alive	0	1935	0	1935	0	1935	0	1935	TCGA-AR-A2LM-01	0.366667	0.13
TCGA-AR-A2LN	BRCA	Wild	65	FEMALE	WHITE	Stage IIA	Alive	0	1161	0	1161	0	1161	0	1161	TCGA-AR-A2LN-01	1.26667	0.03
TCGA-AR-A2LO	BRCA	Wild	46	FEMALE	WHITE	Stage IIB	Alive	0	1198	0	1198	0	1198	0	1198	TCGA-AR-A2LO-01	0.533333	0.09
TCGA-AR-A2LQ	BRCA	Wild	59	FEMALE	WHITE	Stage IIB	Alive	0	1233	0	1233	0	1233	0	1233	TCGA-AR-A2LQ-01	0.333333	0
TCGA-AR-A5QM	BRCA	Wild	62	FEMALE	WHITE	Stage IIA	Alive	0	2231	0	2231	#N/A	#N/A	1	968	TCGA-AR-A5QM-01	0.866667	0.04
TCGA-AR-A5QN	BRCA	Wild	68	FEMALE	WHITE	Stage IIIC	Alive	0	1013	0	1013	#N/A	#N/A	0	1013	TCGA-AR-A5QN-01	1	0.03
TCGA-AR-A5QP	BRCA	Wild	54	FEMALE	WHITE	Stage IIB	Alive	0	1185	0	1185	#N/A	#N/A	0	1185	TCGA-AR-A5QP-01	0.866667	0
TCGA-AR-A5QQ	BRCA	Wild	68	FEMALE	WHITE	Stage IIIA	Dead	1	322	1	322	#N/A	#N/A	1	301	TCGA-AR-A5QQ-01	2.23333	0
TCGA-B6-A0I1	BRCA	Wild	73	FEMALE	BLACK OR AFRICAN AMERICAN	Stage IIA	Dead	1	2361	0	2361	1	1120	1	1120	TCGA-B6-A0I1-01	1.7	0.82
TCGA-B6-A0I2	BRCA	Wild	45	FEMALE	WHITE	Stage IA	Alive	0	4361	0	4361	#N/A	#N/A	0	4361	TCGA-B6-A0I2-01	1.8	0.46
TCGA-B6-A0I5	BRCA	Wild	49	FEMALE	WHITE	Stage IIB	Alive	0	8556	0	8556	0	8556	0	8556	TCGA-B6-A0I5-01	0.833333	0.08
TCGA-B6-A0I6	BRCA	Wild	49	FEMALE	BLACK OR AFRICAN AMERICAN	Stage IIA	Dead	1	991	1	991	1	859	1	859	TCGA-B6-A0I6-01	0	2.69
TCGA-B6-A0I8	BRCA	Wild	46	FEMALE	WHITE	Stage X	Dead	1	749	1	749	#N/A	#N/A	1	746	TCGA-B6-A0I8-01	3.73333	0.57
TCGA-B6-A0I9	BRCA	Wild	62	FEMALE	WHITE	Stage IV	Dead	1	362	1	362	#N/A	#N/A	1	362	TCGA-B6-A0I9-01	2.4	0.58
TCGA-B6-A0IA	BRCA	Wild	51	FEMALE	WHITE	Stage IIA	Alive	0	8391	0	8391	0	8391	0	8391	TCGA-B6-A0IA-01	0.9	0.3
TCGA-B6-A0IB	BRCA	Wild	64	FEMALE	WHITE	Stage IV	Dead	1	3941	1	3941	#N/A	#N/A	1	2717	TCGA-B6-A0IB-01	2.2	0.25
TCGA-B6-A0IC	BRCA	Wild	90	FEMALE	WHITE	Stage X	Dead	1	1542	0	1542	0	1542	0	1542	TCGA-B6-A0IC-01	1	0.11
TCGA-B6-A0IE	BRCA	Wild	38	FEMALE	BLACK OR AFRICAN AMERICAN	Stage IIIA	Dead	1	1993	1	1993	1	834	1	834	TCGA-B6-A0IE-01	1	0.22
TCGA-B6-A0IG	BRCA	Wild	50	FEMALE	WHITE	Stage IIB	Dead	1	4456	1	4456	#N/A	#N/A	1	4456	TCGA-B6-A0IG-01	1.23333	0.24
TCGA-B6-A0IH	BRCA	Wild	81	FEMALE	WHITE	Stage IIIA	Dead	1	3418	#N/A	3418	0	3418	0	3418	TCGA-B6-A0IH-01	1.23333	0.02
TCGA-B6-A0IJ	BRCA	Wild	42	FEMALE	BLACK OR AFRICAN AMERICAN	Stage IIB	Alive	0	7106	0	7106	0	7106	0	7106	TCGA-B6-A0IJ-01	4.4	0.38
TCGA-B6-A0IK	BRCA	Wild	63	FEMALE	WHITE	Stage IIIB	Dead	1	571	1	571	1	489	1	489	TCGA-B6-A0IK-01	3.8	0.25
TCGA-B6-A0IM	BRCA	Wild	75	FEMALE	BLACK OR AFRICAN AMERICAN	Stage IIB	Dead	1	3873	0	3873	0	3873	0	3873	TCGA-B6-A0IM-01	0.933333	0.17
TCGA-B6-A0IN	BRCA	Wild	45	FEMALE	WHITE	Stage X	Dead	1	2573	1	2573	1	1412	1	1412	TCGA-B6-A0IN-01	0.966667	0.12
TCGA-B6-A0IO	BRCA	Wild	66	FEMALE	WHITE	Stage IIA	Alive	0	5042	0	5042	0	5042	0	5042	TCGA-B6-A0IO-01	1.93333	0.24
TCGA-B6-A0IP	BRCA	Wild	74	FEMALE	WHITE	Stage IA	Dead	1	3926	0	3926	0	3926	0	3926	TCGA-B6-A0IP-01	1.2	0.01
TCGA-B6-A0IQ	BRCA	Wild	40	FEMALE	WHITE	Stage IIIA	Alive	0	4285	0	4285	0	4285	0	4285	TCGA-B6-A0IQ-01	2.16667	0.53
TCGA-B6-A0RE	BRCA	Wild	61	FEMALE	BLACK OR AFRICAN AMERICAN	Stage X	Alive	0	7777	0	7777	0	7777	0	7777	TCGA-B6-A0RE-01	4.66667	1.22
TCGA-B6-A0RG	BRCA	Wild	26	FEMALE	WHITE	Stage IIB	Alive	0	2082	0	2082	0	2082	0	2082	TCGA-B6-A0RG-01	2.26667	0.49
TCGA-B6-A0RH	BRCA	Wild	51	FEMALE	BLACK OR AFRICAN AMERICAN	Stage IIA	Dead	1	6456	0	6456	1	2165	1	2165	TCGA-B6-A0RH-01	1.26667	0.22
TCGA-B6-A0RI	BRCA	Wild	44	FEMALE	WHITE	Stage IIIB	Alive	0	7126	0	7126	1	1100	1	1100	TCGA-B6-A0RI-01	0.666667	0.02
TCGA-B6-A0RL	BRCA	Wild	60	FEMALE	BLACK OR AFRICAN AMERICAN	Stage IIA	Dead	1	2469	0	2469	0	2469	0	2469	TCGA-B6-A0RL-01	1.73333	0.93
TCGA-B6-A0RM	BRCA	Wild	57	FEMALE	BLACK OR AFRICAN AMERICAN	Stage X	Dead	1	2373	0	2373	#N/A	#N/A	0	2373	TCGA-B6-A0RM-01	0.933333	0.09
TCGA-B6-A0RN	BRCA	Wild	60	FEMALE	WHITE	Stage IA	Alive	0	8008	0	8008	0	8008	0	8008	TCGA-B6-A0RN-01	0.833333	0.04
TCGA-B6-A0RO	BRCA	Wild	71	FEMALE	WHITE	Stage IIIB	Alive	0	4929	0	4929	0	4929	0	4929	TCGA-B6-A0RO-01	1.16667	0.13
TCGA-B6-A0RP	BRCA	Wild	73	FEMALE	WHITE	[Discrepancy]	Dead	1	3126	1	3126	1	2787	1	2787	TCGA-B6-A0RP-01	0.7	0.01
TCGA-B6-A0RQ	BRCA	Wild	68	FEMALE	WHITE	Stage IIB	Dead	1	4267	0	4267	0	4267	0	4267	TCGA-B6-A0RQ-01	1.36667	0.02
TCGA-B6-A0RS	BRCA	Wild	38	FEMALE	WHITE	Stage IIA	Dead	1	3063	1	3063	1	2041	1	2041	TCGA-B6-A0RS-01	4.63333	0.22
TCGA-B6-A0RT	BRCA	Wild	39	FEMALE	WHITE	Stage IIIA	Alive	0	2721	0	2721	#N/A	#N/A	0	2721	TCGA-B6-A0RT-01	1.86667	0.01
TCGA-B6-A0RU	BRCA	Wild	40	FEMALE	WHITE	Stage IA	Alive	0	8605	0	8605	1	3076	1	3076	TCGA-B6-A0RU-01	1.53333	0.25
TCGA-B6-A0RV	BRCA	Wild	42	FEMALE	WHITE	Stage IIIA	Alive	0	5156	0	5156	0	5156	0	5156	TCGA-B6-A0RV-01	1.26667	0
TCGA-B6-A0WS	BRCA	Wild	58	FEMALE	BLACK OR AFRICAN AMERICAN	Stage X	Dead	1	2965	0	2965	#N/A	#N/A	0	2965	TCGA-B6-A0WS-01	0.466667	0.12
TCGA-B6-A0WT	BRCA	Wild	61	FEMALE	WHITE	Stage IIB	Alive	0	5739	0	5739	1	3862	1	3862	TCGA-B6-A0WT-01	0.466667	0.05
TCGA-B6-A0WV	BRCA	Wild	67	FEMALE	WHITE	Stage IIB	Dead	1	2417	0	2417	0	2417	0	2417	TCGA-B6-A0WV-01	0.966667	0.52
TCGA-B6-A0WW	BRCA	Wild	58	FEMALE	BLACK OR AFRICAN AMERICAN	Stage X	Dead	1	558	1	558	1	447	1	447	TCGA-B6-A0WW-01	1.13333	0.67
TCGA-B6-A0WX	BRCA	Wild	40	FEMALE	BLACK OR AFRICAN AMERICAN	Stage IIIA	Dead	1	639	1	639	1	563	1	563	TCGA-B6-A0WX-01	0.9	0.18
TCGA-B6-A0WY	BRCA	Wild	40	FEMALE	WHITE	Stage IIIA	Dead	1	3461	1	3461	1	2011	1	2011	TCGA-B6-A0WY-01	1.03333	0.08
TCGA-B6-A0WZ	BRCA	Wild	50	FEMALE	BLACK OR AFRICAN AMERICAN	Stage II	Alive	0	6292	0	6292	0	6292	1	5117	TCGA-B6-A0WZ-01	1.86667	0.04
TCGA-B6-A0X0	BRCA	Wild	54	FEMALE	WHITE	Stage I	Dead	1	3945	#N/A	3945	0	3945	0	3945	TCGA-B6-A0X0-01	0.633333	0.05
TCGA-B6-A0X1	BRCA	Wild	48	FEMALE	WHITE	[Discrepancy]	Dead	1	7455	0	7455	1	490	1	490	TCGA-B6-A0X1-01	2.26667	1.54
TCGA-B6-A0X4	BRCA	Wild	62	FEMALE	WHITE	Stage IIB	Dead	1	860	1	860	1	716	1	716	TCGA-B6-A0X4-01	0.6	0
TCGA-B6-A0X5	BRCA	Wild	61	FEMALE	BLACK OR AFRICAN AMERICAN	Stage IIB	Dead	1	2097	1	2097	1	1343	1	1343	TCGA-B6-A0X5-01	1.2	0.01
TCGA-B6-A0X7	BRCA	Wild	62	FEMALE	WHITE	Stage X	Dead	1	1781	0	1781	#N/A	#N/A	1	1104	TCGA-B6-A0X7-01	0.533333	0.16
TCGA-B6-A1KC	BRCA	Wild	67	FEMALE	WHITE	Stage IIB	Alive	0	1326	0	1326	0	1326	0	1326	TCGA-B6-A1KC-01	0.866667	1.45
TCGA-B6-A1KF	BRCA	Wild	68	FEMALE	WHITE	Stage IIB	Alive	0	3088	0	3088	0	3088	0	3088	TCGA-B6-A1KF-01	1.56667	0.99
TCGA-B6-A1KI	BRCA	Wild	63	FEMALE	WHITE	Stage I	Alive	0	2236	0	2236	0	2236	0	2236	TCGA-B6-A1KI-01	0.7	0.28
TCGA-B6-A1KN	BRCA	Wild	57	FEMALE	WHITE	Stage IIIB	Alive	0	4233	0	4233	0	4233	0	4233	TCGA-B6-A1KN-01	1.96667	0.82
TCGA-B6-A2IU	BRCA	Wild	62	FEMALE	WHITE	Stage IIA	Alive	0	5176	0	5176	0	5176	1	4224	TCGA-B6-A2IU-01	1.23333	0.03
TCGA-B6-A3ZX	BRCA	Wild	50	FEMALE	BLACK OR AFRICAN AMERICAN	Stage IV	Dead	1	1152	1	1152	#N/A	#N/A	1	994	TCGA-B6-A3ZX-01	0	0
TCGA-B6-A400	BRCA	Wild	43	FEMALE	BLACK OR AFRICAN AMERICAN	Stage IIIA	Alive	0	215	0	215	0	215	0	215	TCGA-B6-A400-01	0	0.48
TCGA-B6-A401	BRCA	Wild	47	FEMALE	BLACK OR AFRICAN AMERICAN	Stage IIA	Alive	0	2596	0	2596	0	2596	0	2596	TCGA-B6-A401-01	0.633333	0
TCGA-B6-A402	BRCA	Wild	47	FEMALE	BLACK OR AFRICAN AMERICAN	Stage I	Alive	0	2281	0	2281	1	1516	1	1516	TCGA-B6-A402-01	0	0.48
TCGA-B6-A408	BRCA	Wild	55	FEMALE	BLACK OR AFRICAN AMERICAN	Stage IIIC	Alive	0	2072	0	2072	0	2072	0	2072	TCGA-B6-A408-01	0	0.05
TCGA-B6-A409	BRCA	Wild	44	FEMALE	BLACK OR AFRICAN AMERICAN	Stage IIIA	Dead	1	573	1	573	1	456	1	456	TCGA-B6-A409-01	0.966667	0.07
TCGA-B6-A40B	BRCA	Wild	76	FEMALE	WHITE	Stage I	Alive	0	3152	0	3152	0	3152	0	3152	TCGA-B6-A40B-01	1.36667	0.01
TCGA-B6-A40C	BRCA	Wild	51	FEMALE	WHITE	Stage IIB	Alive	0	2164	0	2164	0	2164	0	2164	TCGA-B6-A40C-01	1.13333	0.05
TCGA-BH-A0AU	BRCA	Wild	45	FEMALE	WHITE	Stage IIA	Alive	0	1914	0	1914	0	1914	0	1914	TCGA-BH-A0AU-01	0.566667	0.16
TCGA-BH-A0AV	BRCA	Wild	52	FEMALE	BLACK OR AFRICAN AMERICAN	Stage I	Alive	0	1820	0	1820	0	1820	0	1820	TCGA-BH-A0AV-01	1.86667	0.11
TCGA-BH-A0AW	BRCA	Wild	56	FEMALE	WHITE	Stage IIA	Alive	0	622	0	622	0	622	0	622	TCGA-BH-A0AW-01	4.6	0.21
TCGA-BH-A0AY	BRCA	Wild	62	FEMALE	WHITE	Stage IIA	Alive	0	777	0	777	0	777	0	777	TCGA-BH-A0AY-01	3.4	0.73
TCGA-BH-A0AZ	BRCA	Wild	47	FEMALE	WHITE	Stage IIIA	Alive	0	1919	0	1919	0	1919	0	1919	TCGA-BH-A0AZ-01	1.93333	0.16
TCGA-BH-A0B0	BRCA	Wild	56	FEMALE	BLACK OR AFRICAN AMERICAN	Stage I	Alive	0	2477	0	2477	0	2477	0	2477	TCGA-BH-A0B0-01	2.2	0.08
TCGA-BH-A0B1	BRCA	Wild	66	FEMALE	WHITE	Stage IIB	Alive	0	1148	0	1148	0	1148	0	1148	TCGA-BH-A0B1-01	1.63333	0.6
TCGA-BH-A0B3	BRCA	Wild	53	FEMALE	WHITE	Stage IIB	Alive	0	1203	0	1203	0	1203	0	1203	TCGA-BH-A0B3-01	2.46667	0.41
TCGA-BH-A0B4	BRCA	Wild	65	MALE	WHITE	Stage IIIA	Alive	0	1191	0	1191	0	1191	0	1191	TCGA-BH-A0B4-01	2.16667	0.08
TCGA-BH-A0B5	BRCA	Wild	40	FEMALE	WHITE	Stage IIIA	Alive	0	2136	0	2136	#N/A	#N/A	0	2136	TCGA-BH-A0B5-01	2.03333	0.18
TCGA-BH-A0B7	BRCA	Wild	42	FEMALE	WHITE	Stage IIB	Alive	0	2559	0	2559	0	2559	0	2559	TCGA-BH-A0B7-01	2.36667	0.02
TCGA-BH-A0B8	BRCA	Wild	64	FEMALE	WHITE	Stage I	Alive	0	1569	0	1569	0	1569	0	1569	TCGA-BH-A0B8-01	4	1.28
TCGA-BH-A0B9	BRCA	Wild	44	FEMALE	WHITE	Stage IA	Alive	0	1572	0	1572	0	1572	0	1572	TCGA-BH-A0B9-01	1	0.51
TCGA-BH-A0BA	BRCA	Wild	51	FEMALE	WHITE	Stage IIIC	Alive	0	1132	0	1132	0	1132	0	1132	TCGA-BH-A0BA-01	2.4	0.78
TCGA-BH-A0BC	BRCA	Wild	60	FEMALE	WHITE	Stage IIIC	Alive	0	974	0	974	0	974	0	974	TCGA-BH-A0BC-01	1.93333	0.04
TCGA-BH-A0BD	BRCA	Wild	47	FEMALE	WHITE	Stage IIA	Alive	0	554	0	554	0	554	0	554	TCGA-BH-A0BD-01	0.966667	0.18
TCGA-BH-A0BF	BRCA	Wild	56	FEMALE	WHITE	Stage IIB	Dead	1	1324	0	1324	0	1324	0	1324	TCGA-BH-A0BF-01	0.7	0.02
TCGA-BH-A0BG	BRCA	Wild	73	FEMALE	WHITE	Stage I	Alive	0	1871	0	1871	0	1871	0	1871	TCGA-BH-A0BG-01	1.13333	0.7
TCGA-BH-A0BJ	BRCA	Wild	41	FEMALE	WHITE	Stage IIB	Alive	0	660	0	660	0	660	0	660	TCGA-BH-A0BJ-01	1.7	0.66
TCGA-BH-A0BL	BRCA	Wild	35	FEMALE	WHITE	Stage I	Alive	0	2278	0	2278	0	2278	0	2278	TCGA-BH-A0BL-01	3.6	0.08
TCGA-BH-A0BM	BRCA	Wild	54	FEMALE	WHITE	Stage IIB	Alive	0	1876	0	1876	0	1876	0	1876	TCGA-BH-A0BM-01	1.73333	0.04
TCGA-BH-A0BO	BRCA	Wild	54	FEMALE	WHITE	Stage I	Alive	0	2197	0	2197	0	2197	0	2197	TCGA-BH-A0BO-01	1.73333	0
TCGA-BH-A0BP	BRCA	Wild	76	FEMALE	WHITE	Stage I	Dead	1	2296	0	2296	0	2296	0	2296	TCGA-BH-A0BP-01	4.63333	0.47
TCGA-BH-A0BQ	BRCA	Wild	39	FEMALE	WHITE	Stage I	Alive	0	2255	0	2255	1	1709	1	1709	TCGA-BH-A0BQ-01	1.5	0
TCGA-BH-A0BR	BRCA	Wild	59	FEMALE	WHITE	Stage I	Alive	0	2330	0	2330	0	2330	0	2330	TCGA-BH-A0BR-01	1.7	0.09
TCGA-BH-A0BS	BRCA	Wild	55	FEMALE	WHITE	Stage IIIA	Alive	0	2612	0	2612	0	2612	0	2612	TCGA-BH-A0BS-01	0.433333	0.06
TCGA-BH-A0BT	BRCA	Wild	56	FEMALE	WHITE	Stage IIA	Alive	0	2365	0	2365	0	2365	0	2365	TCGA-BH-A0BT-01	1.23333	0.72
TCGA-BH-A0BV	BRCA	Wild	78	FEMALE	WHITE	Stage IIB	Alive	0	1519	0	1519	0	1519	0	1519	TCGA-BH-A0BV-01	1.76667	0.27
TCGA-BH-A0BW	BRCA	Wild	71	FEMALE	BLACK OR AFRICAN AMERICAN	Stage I	Alive	0	2371	0	2371	0	2371	0	2371	TCGA-BH-A0BW-01	4.7	0.68
TCGA-BH-A0BZ	BRCA	Wild	59	FEMALE	WHITE	Stage IIIA	Alive	0	2255	0	2255	0	2255	0	2255	TCGA-BH-A0BZ-01	8.2	0.32
TCGA-BH-A0C0	BRCA	Wild	62	FEMALE	WHITE	Stage IIA	Alive	0	1270	0	1270	0	1270	0	1270	TCGA-BH-A0C0-01	6.16667	0.3
TCGA-BH-A0C1	BRCA	Wild	61	FEMALE	WHITE	Stage IIIA	Dead	1	1411	1	1411	1	1123	1	1123	TCGA-BH-A0C1-01	1.06667	0.08
TCGA-BH-A0C3	BRCA	Wild	47	FEMALE	WHITE	Stage I	Alive	0	2709	0	2709	1	2674	1	2674	TCGA-BH-A0C3-01	0.366667	0.05
TCGA-BH-A0C7	BRCA	Wild	48	FEMALE	WHITE	Stage IIB	Alive	0	2767	0	2767	0	2767	0	2767	TCGA-BH-A0C7-01	1.43333	0.03
TCGA-BH-A0DD	BRCA	Wild	58	MALE	WHITE	Stage IIB	Alive	0	2486	0	2486	0	2486	0	2486	TCGA-BH-A0DD-01	0.666667	0.28
TCGA-BH-A0DE	BRCA	Wild	62	FEMALE	WHITE	Stage IIA	Alive	0	2372	0	2372	0	2372	0	2372	TCGA-BH-A0DE-01	1.9	0.04
TCGA-BH-A0DG	BRCA	Wild	30	FEMALE	BLACK OR AFRICAN AMERICAN	Stage IIA	Alive	0	2041	0	2041	0	2041	0	2041	TCGA-BH-A0DG-01	1.13333	0.12
TCGA-BH-A0DH	BRCA	Wild	63	FEMALE	WHITE	Stage IIB	Alive	0	1156	0	1156	0	1156	0	1156	TCGA-BH-A0DH-01	2.3	0.03
TCGA-BH-A0DI	BRCA	Wild	63	FEMALE	WHITE	Stage IIB	Alive	0	912	0	912	0	912	0	912	TCGA-BH-A0DI-01	1.3	0.01
TCGA-BH-A0DK	BRCA	Wild	49	FEMALE	WHITE	Stage IIA	Alive	0	423	0	423	0	423	0	423	TCGA-BH-A0DK-01	5.73333	0.32
TCGA-BH-A0DL	BRCA	Wild	64	FEMALE	WHITE	Stage IIA	Alive	0	2381	0	2381	0	2381	0	2381	TCGA-BH-A0DL-01	3.3	0.18
TCGA-BH-A0DO	BRCA	Wild	78	FEMALE	WHITE	Stage I	Alive	0	1644	0	1644	0	1644	0	1644	TCGA-BH-A0DO-01	0.7	0.01
TCGA-BH-A0DP	BRCA	Wild	60	FEMALE	WHITE	Stage IIB	Alive	0	476	0	476	0	476	0	476	TCGA-BH-A0DP-01	1.76667	0.14
TCGA-BH-A0DQ	BRCA	Wild	42	FEMALE	WHITE	Stage IIB	Alive	0	98	0	98	0	98	0	98	TCGA-BH-A0DQ-01	2.03333	0.03
TCGA-BH-A0DS	BRCA	Wild	71	FEMALE	WHITE	Stage IIIA	Alive	0	78	0	78	0	78	0	78	TCGA-BH-A0DS-01	1.16667	0.58
TCGA-BH-A0DT	BRCA	Wild	41	FEMALE	WHITE	Stage IIA	Alive	0	2403	0	2403	0	2403	0	2403	TCGA-BH-A0DT-01	0.5	0.02
TCGA-BH-A0DV	BRCA	Wild	54	FEMALE	WHITE	Stage IIIA	Alive	0	2064	0	2064	0	2064	0	2064	TCGA-BH-A0DV-01	0.566667	0
TCGA-BH-A0DX	BRCA	Wild	62	FEMALE	WHITE	Stage I	Alive	0	2156	0	2156	0	2156	0	2156	TCGA-BH-A0DX-01	1.96667	0.02
TCGA-BH-A0E0	BRCA	Wild	38	FEMALE	WHITE	Stage IIIC	Alive	0	134	0	134	0	134	0	134	TCGA-BH-A0E0-01	1.96667	0.73
TCGA-BH-A0E1	BRCA	Wild	52	FEMALE	WHITE	Stage IIB	Alive	0	477	0	477	0	477	0	477	TCGA-BH-A0E1-01	1.46667	0.36
TCGA-BH-A0E2	BRCA	Wild	49	FEMALE	BLACK OR AFRICAN AMERICAN	Stage IIIA	Alive	0	435	0	435	0	435	0	435	TCGA-BH-A0E2-01	1.43333	0.64
TCGA-BH-A0E6	BRCA	Wild	69	FEMALE	WHITE	Stage IA	Alive	0	293	0	293	0	293	0	293	TCGA-BH-A0E6-01	2.3	0
TCGA-BH-A0E7	BRCA	Wild	79	FEMALE	WHITE	Stage IIB	Alive	0	1363	0	1363	0	1363	0	1363	TCGA-BH-A0E7-01	1.36667	0.01
TCGA-BH-A0E9	BRCA	Wild	53	FEMALE	WHITE	Stage IIB	Alive	0	2489	0	2489	0	2489	0	2489	TCGA-BH-A0E9-01	1.1	0.01
TCGA-BH-A0EA	BRCA	Wild	72	FEMALE	WHITE	Stage IIA	Dead	1	991	0	991	0	991	0	991	TCGA-BH-A0EA-01	0.833333	0.05
TCGA-BH-A0EB	BRCA	Wild	69	FEMALE	WHITE	Stage IA	Alive	0	745	0	745	0	745	0	745	TCGA-BH-A0EB-01	1.53333	0
TCGA-BH-A0EE	BRCA	Wild	68	FEMALE	WHITE	Stage IIB	Alive	0	943	0	943	0	943	0	943	TCGA-BH-A0EE-01	4.1	0.09
TCGA-BH-A0EI	BRCA	Wild	51	FEMALE	WHITE	Stage IIA	Alive	0	1926	0	1926	0	1926	0	1926	TCGA-BH-A0EI-01	0.533333	0.07
TCGA-BH-A0GY	BRCA	Wild	67	FEMALE	WHITE	Stage IIA	Alive	0	923	0	923	0	923	0	923	TCGA-BH-A0GY-01	1.13333	0.4
TCGA-BH-A0GZ	BRCA	Wild	62	FEMALE	WHITE	Stage IIA	Alive	0	328	0	328	0	328	0	328	TCGA-BH-A0GZ-01	1.13333	0.07
TCGA-BH-A0H0	BRCA	Wild	69	FEMALE	WHITE	Stage IA	Alive	0	461	0	461	0	461	0	461	TCGA-BH-A0H0-01	0.6	0.7
TCGA-BH-A0H3	BRCA	Wild	46	FEMALE	WHITE	Stage I	Alive	0	1928	0	1928	0	1928	0	1928	TCGA-BH-A0H3-01	0.433333	0.01
TCGA-BH-A0H5	BRCA	Wild	45	FEMALE	WHITE	Stage I	Alive	0	1620	0	1620	0	1620	0	1620	TCGA-BH-A0H5-01	7.63333	0
TCGA-BH-A0H6	BRCA	Wild	82	FEMALE	WHITE	Stage I	Alive	0	747	0	747	0	747	0	747	TCGA-BH-A0H6-01	0.566667	0.11
TCGA-BH-A0H7	BRCA	Wild	65	FEMALE	WHITE	Stage IIIA	Alive	0	702	0	702	0	702	0	702	TCGA-BH-A0H7-01	2.66667	0.85
TCGA-BH-A0H9	BRCA	Wild	69	FEMALE	WHITE	Stage IIA	Alive	0	1247	0	1247	0	1247	0	1247	TCGA-BH-A0H9-01	2.2	0.36
TCGA-BH-A0HA	BRCA	Wild	31	FEMALE	WHITE	Stage I	Alive	0	1611	0	1611	0	1611	0	1611	TCGA-BH-A0HA-01	11.0333	8.53
TCGA-BH-A0HB	BRCA	Wild	55	FEMALE	WHITE	Stage IA	Alive	0	806	0	806	0	806	0	806	TCGA-BH-A0HB-01	1.06667	0.25
TCGA-BH-A0HF	BRCA	Wild	77	FEMALE	WHITE	Stage IA	Alive	0	727	0	727	0	727	0	727	TCGA-BH-A0HF-01	28	0.19
TCGA-BH-A0HI	BRCA	Wild	78	FEMALE	WHITE	Stage IA	Alive	0	620	0	620	0	620	0	620	TCGA-BH-A0HI-01	1.03333	0.01
TCGA-BH-A0HK	BRCA	Wild	81	FEMALE	WHITE	Stage IIB	Alive	0	178	0	178	0	178	0	178	TCGA-BH-A0HK-01	5.7	0.63
TCGA-BH-A0HL	BRCA	Wild	56	FEMALE	WHITE	Stage IIB	Alive	0	72	0	72	0	72	0	72	TCGA-BH-A0HL-01	1.1	0.56
TCGA-BH-A0HN	BRCA	Wild	67	FEMALE	WHITE	Stage IA	Alive	0	516	0	516	0	516	0	516	TCGA-BH-A0HN-01	0.833333	0.75
TCGA-BH-A0HO	BRCA	Wild	48	FEMALE	WHITE	Stage IIA	Alive	0	76	0	76	0	76	0	76	TCGA-BH-A0HO-01	0.466667	0.01
TCGA-BH-A0HP	BRCA	Wild	65	FEMALE	WHITE	Stage IIIA	Alive	0	414	0	414	0	414	0	414	TCGA-BH-A0HP-01	7.93333	0
TCGA-BH-A0HQ	BRCA	Wild	56	FEMALE	WHITE	Stage IIA	Alive	0	1121	0	1121	0	1121	0	1121	TCGA-BH-A0HQ-01	0.9	0.21
TCGA-BH-A0HU	BRCA	Wild	52	FEMALE	WHITE	Stage IA	Alive	0	392	0	392	0	392	0	392	TCGA-BH-A0HU-01	1.06667	0.47
TCGA-BH-A0HW	BRCA	Wild	62	FEMALE	ASIAN	Stage IA	Alive	0	1561	0	1561	0	1561	0	1561	TCGA-BH-A0HW-01	1.13333	0.32
TCGA-BH-A0HX	BRCA	Wild	54	FEMALE	WHITE	Stage IIB	Alive	0	829	0	829	0	829	0	829	TCGA-BH-A0HX-01	1.93333	0.43
TCGA-BH-A0HY	BRCA	Wild	60	FEMALE	WHITE	Stage I	Alive	0	1545	0	1545	0	1545	0	1545	TCGA-BH-A0HY-01	1.8	1.06
TCGA-BH-A0RX	BRCA	Wild	59	FEMALE	WHITE	Stage IIA	Alive	0	170	0	170	0	170	0	170	TCGA-BH-A0RX-01	1.3	0.01
TCGA-BH-A0W3	BRCA	Wild	58	FEMALE	WHITE	Stage IIA	Alive	0	728	0	728	#N/A	#N/A	0	728	TCGA-BH-A0W3-01	0.466667	0.33
TCGA-BH-A0W4	BRCA	Wild	46	FEMALE	WHITE	Stage IIA	Alive	0	759	0	759	#N/A	#N/A	0	759	TCGA-BH-A0W4-01	1.1	0.03
TCGA-BH-A0W5	BRCA	Wild	77	FEMALE	WHITE	Stage IIA	Alive	0	1288	0	1288	0	1288	0	1288	TCGA-BH-A0W5-01	0.866667	0.01
TCGA-BH-A0W7	BRCA	Wild	49	FEMALE	WHITE	Stage I	Alive	0	1363	0	1363	0	1363	0	1363	TCGA-BH-A0W7-01	5.5	0.05
TCGA-BH-A0WA	BRCA	Wild	82	FEMALE	WHITE	Stage I	Alive	0	701	0	701	0	701	0	701	TCGA-BH-A0WA-01	2.96667	0.54
TCGA-BH-A18F	BRCA	Wild	50	FEMALE	WHITE	Stage IIA	Alive	0	1001	0	1001	0	1001	0	1001	TCGA-BH-A18F-01	1.56667	0.02
TCGA-BH-A18G	BRCA	Wild	81	FEMALE	WHITE	Stage IA	Alive	0	149	0	149	0	149	0	149	TCGA-BH-A18G-01	41.8333	26.46
TCGA-BH-A18H	BRCA	Wild	63	FEMALE	WHITE	Stage IA	Alive	0	652	0	652	0	652	0	652	TCGA-BH-A18H-01	1.36667	0.04
TCGA-BH-A18I	BRCA	Wild	53	FEMALE	WHITE	Stage IIA	Alive	0	1093	0	1093	0	1093	0	1093	TCGA-BH-A18I-01	0.833333	0.04
TCGA-BH-A18J	BRCA	Wild	56	FEMALE	WHITE	Stage IV	Dead	1	612	1	612	#N/A	#N/A	1	612	TCGA-BH-A18J-01	2.5	0.08
TCGA-BH-A18K	BRCA	Wild	46	FEMALE	WHITE	Stage I	Dead	1	2763	1	2763	#N/A	#N/A	1	2763	TCGA-BH-A18K-01	1.66667	0.3
TCGA-BH-A18L	BRCA	Wild	50	FEMALE	WHITE	Stage IIIA	Dead	1	811	#N/A	811	0	811	0	811	TCGA-BH-A18L-01	1.5	0.77
TCGA-BH-A18M	BRCA	Wild	39	FEMALE	WHITE	Stage IIIA	Dead	1	2207	#N/A	2207	0	2207	0	2207	TCGA-BH-A18M-01	0.566667	0.01
TCGA-BH-A18N	BRCA	Wild	88	FEMALE	WHITE	Stage IIA	Dead	1	1148	#N/A	1148	0	1148	0	1148	TCGA-BH-A18N-01	1.03333	0.26
TCGA-BH-A18P	BRCA	Wild	60	FEMALE	WHITE	Stage I	Dead	1	921	1	921	#N/A	#N/A	1	921	TCGA-BH-A18P-01	9.2	0.06
TCGA-BH-A18Q	BRCA	Wild	56	FEMALE	WHITE	Stage IIB	Dead	1	1692	#N/A	1692	0	1692	0	1692	TCGA-BH-A18Q-01	2.5	1.55
TCGA-BH-A18R	BRCA	Wild	50	FEMALE	WHITE	Stage IIA	Dead	1	1142	0	1142	0	1142	0	1142	TCGA-BH-A18R-01	0.966667	0.22
TCGA-BH-A18S	BRCA	Wild	79	FEMALE	WHITE	Stage I	Dead	1	2009	0	2009	0	2009	0	2009	TCGA-BH-A18S-01	0.866667	0.17
TCGA-BH-A18T	BRCA	Wild	70	FEMALE	WHITE	Stage IIA	Dead	1	224	1	224	#N/A	#N/A	1	224	TCGA-BH-A18T-01	2.43333	1.63
TCGA-BH-A18U	BRCA	Wild	72	FEMALE	WHITE	Stage IIIA	Dead	1	1563	0	1563	0	1563	0	1563	TCGA-BH-A18U-01	4.13333	1.48
TCGA-BH-A18V	BRCA	Wild	48	FEMALE	WHITE	Stage IIB	Dead	1	1556	#N/A	1556	0	1556	0	1556	TCGA-BH-A18V-01	5.93333	1.38
TCGA-BH-A1EN	BRCA	Wild	78	FEMALE	WHITE	Stage IIA	Dead	1	2127	0	2127	0	2127	0	2127	TCGA-BH-A1EN-01	2.13333	0.37
TCGA-BH-A1EO	BRCA	Wild	68	FEMALE	WHITE	Stage IIA	Dead	1	2798	0	2798	#N/A	#N/A	0	2798	TCGA-BH-A1EO-01	1.36667	0.2
TCGA-BH-A1ES	BRCA	Wild	35	FEMALE	WHITE	Stage IIB	Dead	1	3462	1	3462	#N/A	#N/A	1	3462	TCGA-BH-A1ES-01	0	0.25
TCGA-BH-A1ET	BRCA	Wild	55	FEMALE	WHITE	Stage I	Dead	1	2520	0	2520	#N/A	#N/A	0	2520	TCGA-BH-A1ET-01	0.833333	0.06
TCGA-BH-A1EU	BRCA	Wild	83	FEMALE	WHITE	Stage I	Dead	1	1286	0	1286	#N/A	#N/A	0	1286	TCGA-BH-A1EU-01	0.866667	0.01
TCGA-BH-A1EV	BRCA	Wild	45	FEMALE	WHITE	Stage IIIA	Dead	1	365	1	365	#N/A	#N/A	1	365	TCGA-BH-A1EV-01	2.83333	0.41
TCGA-BH-A1EW	BRCA	Wild	38	FEMALE	WHITE	Stage IIA	Dead	1	1694	1	1694	#N/A	#N/A	1	1694	TCGA-BH-A1EW-01	0.466667	0.03
TCGA-BH-A1EX	BRCA	Wild	67	FEMALE	WHITE	Stage IIB	Dead	1	1508	1	1508	#N/A	#N/A	1	1508	TCGA-BH-A1EX-01	0.8	0.23
TCGA-BH-A1EY	BRCA	Wild	79	FEMALE	WHITE	Stage IIA	Dead	1	538	1	538	#N/A	#N/A	1	396	TCGA-BH-A1EY-01	1.23333	0.05
TCGA-BH-A1F0	BRCA	Wild	80	FEMALE	WHITE	Stage IIA	Dead	1	785	1	785	#N/A	#N/A	1	785	TCGA-BH-A1F0-01	1.96667	0.01
TCGA-BH-A1F2	BRCA	Wild	53	FEMALE	WHITE	Stage IIIB	Dead	1	959	0	959	#N/A	#N/A	0	959	TCGA-BH-A1F2-01	1.66667	0.34
TCGA-BH-A1F5	BRCA	Wild	62	FEMALE	WHITE	Stage IIA	Dead	1	2712	0	2712	#N/A	#N/A	0	2712	TCGA-BH-A1F5-01	1.03333	0.28
TCGA-BH-A1F6	BRCA	Wild	51	FEMALE	WHITE	[Not Available]	Dead	1	2965	#N/A	2965	#N/A	#N/A	0	2965	TCGA-BH-A1F6-01	1.1	0.46
TCGA-BH-A1F8	BRCA	Wild	90	FEMALE	WHITE	Stage IIIB	Dead	1	763	1	763	#N/A	#N/A	1	763	TCGA-BH-A1F8-01	4.33333	0.62
TCGA-BH-A1FB	BRCA	Wild	60	FEMALE	WHITE	Stage IIB	Dead	1	3669	1	3669	#N/A	#N/A	1	3669	TCGA-BH-A1FB-01	0	NA
TCGA-BH-A1FC	BRCA	Wild	78	FEMALE	BLACK OR AFRICAN AMERICAN	Stage IIA	Dead	1	3472	0	3472	#N/A	#N/A	0	3472	TCGA-BH-A1FC-01	3.43333	0.49
TCGA-BH-A1FD	BRCA	Wild	68	FEMALE	WHITE	Stage I	Dead	1	1009	1	1009	#N/A	#N/A	1	1009	TCGA-BH-A1FD-01	0.966667	0.29
TCGA-BH-A1FE	BRCA	Wild	31	FEMALE	WHITE	Stage IIB	Dead	1	2273	1	2273	#N/A	#N/A	1	2273	TCGA-BH-A1FE-01	0.633333	0.03
TCGA-BH-A1FG	BRCA	Wild	88	FEMALE	WHITE	Stage I	Dead	1	3736	#N/A	3736	#N/A	#N/A	0	3736	TCGA-BH-A1FG-01	0.6	0.44
TCGA-BH-A1FH	BRCA	Wild	47	FEMALE	WHITE	Stage IV	Dead	1	1034	1	1034	#N/A	#N/A	1	1034	TCGA-BH-A1FH-01	0.8	0.05
TCGA-BH-A1FJ	BRCA	Wild	66	FEMALE	WHITE	Stage IIIA	Dead	1	1927	#N/A	1927	#N/A	#N/A	0	1927	TCGA-BH-A1FJ-01	0.833333	1.53
TCGA-BH-A1FL	BRCA	Wild	69	FEMALE	WHITE	Stage IIB	Dead	1	1673	1	1673	#N/A	#N/A	1	1673	TCGA-BH-A1FL-01	0.6	0.94
TCGA-BH-A1FM	BRCA	Wild	44	FEMALE	WHITE	Stage IIIA	Dead	1	1388	#N/A	1388	#N/A	#N/A	0	1388	TCGA-BH-A1FM-01	1.66667	0.89
[truncated: 9,120 more rows]

## Sheet: Table S4
Table S4: The clinical data for each sample used in the Zehir cohort.
[truncated: 10,337 more rows]

## Sheet: Table S5
Table S5: Univariate and multivariate cox analyses of clincal characteristics, NTRK3 status and immunotherapy outcomes in discovery and validation cohorts.
[truncated: 30 more rows]

[truncated: 6 more sheets: Table S6, Table S7, Table S8, Table S9, Table S10, Table S11]
